# Supplementary material for: Stepped wedge cluster randomized controlled trial designs: a review of reporting quality and design features
Source: Trials. 2017 Jan 21;18:33. doi: 10.1186/s13063-017-1783-0 (PMC5251280; doi:10.1186/s13063-017-1783-0)
Supplement: Additional file 3: — Included studies and the information extracted from them, along with the records from each of the major stages of the review. (XLSX 5750 kb) [file 13063_2017_1783_MOESM3_ESM.xlsx]

## Sheet: Final included studies
Type of record	Lead author	Title	Publication year	Subject area	Disease/Domain	Nature of intervention	Setting	Country	Received industry support	Motivation for SW-CRCT design use (see Sheet 2)	Level of stepping	Number of steps	Number of clusters	Time period between steps	Design type	Primary outcome measures	Statistical method of data analysis	Intended sample size	Significant result on any primary outcome measure observed with prior specified MCID/type-I error rate	Significant result on any primary outcome measure observed without prior specified MCID/type-I error rate	Phrase "step wedge" or "stepped wedge" used	Phrase "randomised" used	Rationale for stepped wedge design given	Rationale for clustering given	Specific objectives of the trial given	Diagram of the design provided	Description of the trial design provided	Eligiblity criteira for clusters provided	Eligibility criteria for individuals provided	Settings and locations where data collected adequately described	Interventions adequetly described	Completely defined primary outcomes	Completely defined secondary outcomes	Justification for sample size provided	Use or non-use of ICC/CV stated	Type-I error rate used reported	Type-II error rate for design stated	Method of random allocation used	Type of randomisation used	Allocation concealment mechanism used	Who implemented the randomisation detailed	Consent sought from	Blinding adequately described	Flow diagram provided	Losses and exlusions detailed	Dates of the trial provided	Dates of each time period provided	Baseline data reported	Final number of clusters analysed detailed
Report	Bacchieri	A community intervention to prevent traffic accidents among bicycle commuters.	2010	Health	Traffic accidents	Educational	Neighbourhoods	Brazil	N	1, 2	Census sectors	20	40	15 days	Open cohort	Occurrence of traffic accidents	Poisson regression model	1200	N	NA	Y	N	Y	N	Y	N	Y	Y	Y	Y	Y	Y	NA	Y	N	Y	Y	Y	Y	N	N	Y	N	N	Y	Y	N	Y	Y
Report	Bashour	The effect of training doctors in communication skills on women's satisfaction with doctor-woman relationship during labour and delivery: A stepped wedge cluster randomised trial in Damascus.	2013	Health	Women's satisfaction with doctor-woman relationships in labour and delivery rooms	Training package delivered to doctors	Hospitals	Syria	N	1, 2	Hospitals	4	4	2 months	Continuous recruitment short exposure	Women's satisfaction	Generalised linear mixed model	2000	N	NA	Y	Y	Y	N	Y	Y	Y	N	Y	Y	Y	Y	Y	Y	N	Y	Y	Y	Y	Y	Y	Y	Y	Y	Y	Y	N	Y	Y
Report	Chinbuah	Impact of community management of fever (using antimalarials with or without antibiotics) on childhood mortality: A cluster-randomized controlled trial in Ghana.	2012	Health	Childhood mortality	Antimalarials with our without antibiotics to control fever	District	Ghana	N	1, 2	Bespoke clusters of communities	2	114	Variable	Open cohort	All-cause mortality	Poisson regression model	10000	Y	NA	Y	Y	Y	Y	Y	Y	Y	N	Y	Y	Y	Y	NA	Y	Y	Y	Y	Y	Y	Y	Y	Y	Y	Y	Y	Y	Y	Y	Y
Report	Dixon	Is Implementation of the 5 A's of Smoking Cessation at Community Mental Health Centers Effective for Reduction of Smoking by Patients with Serious Mental Illness?	2009	Health	Smoking	Multifcated guidelines	Community mental health centres	USA	N	NS	Mental health clinics	2	6	6 months	Closed cohort	Self reported total number of cigarettes smoked per week, and self reported smoking of any cigarettes in the past seven days	Mixed effects models (linear models for continuous responses and three-level hierarchical logistic models for dichotmous responses)	304	NA	Y	N	N	N	N	Y	N	Y	Y	Y	Y	Y	Y	Y	N	N	N	N	N	Y	N	N	Y	N	N	Y	Y	N	Y	Y
Report	Dryden-Peterson	An Augmented SMS Intervention to Improve Access to Antenatal CD4 Testing and ART Initiation in HIV-Infected Pregnant Women: A Cluster Randomized Trial	2015	Health	HIV	SMS intervention	Antenatal clinics	Botswana	N	1, 2, 11	Antenatal clinics	10	20	4 weeks	Continuous recruitment short exposure	Proportion of HIV infected, ART naive pregnant women completing phlebotomy for CD4 enumaration by 26 weeks gstation and initiating ART by 30 weeks gestation	Generalised estimating equations	N	N	NA	Y	Y	Y	N	Y	Y	Y	Y	Y	Y	Y	Y	N	Y	N	Y	Y	Y	Y	Y	N	Y	Y	Y	Y	Y	N	Y	Y
Report	Durovni	Impact of Replacing Smear Microscopy with Xpert MTB/RIF for Diagnosing Tuberculosis in Brazil: A Stepped-Wedge Cluster-Randomized Trial.	2014	Health	TB	Xpert MTB/RIF for diagnosis	Primary care laboratories	Brazil	N	8	Laborotories	7	14	1 month	Continuous recruitment short exposure	Notification rate of laboratory confirmed pulmonary TB and time to treatment initiation	Multivariable poisson regression model with t/Wilcoxon tests	N	Y	Y	Y	Y	Y	N	Y	Y	Y	N	Y	Y	Y	Y	Y	Y	Y	Y	Y	Y	Y	Y	N	Y	Y	Y	Y	Y	N	Y	Y
Report	Durovni	Impact of tuberculosis screening and isoniazid preventive therapy on incidence of tuberculosis and death in patients with HIV infection receiving care in public clinics in Rio de Janeiro, Brazil: the Tuberculosis/HIV in Rio de Janeiro (THRio) study: a stepped wedge, cluster randomized trial	2013	Health	TB/HIV	TB screening and isoniazid therapy	HIV clinics	Brazil	N	1, 2	HIV clinics	15	29	2 months	Open cohort	TB incidence alone or combined with death	Poisson regression model	2400	N	Y	Y	Y	Y	N	Y	N	Y	Y	Y	Y	Y	Y	Y	Y	Y	Y	Y	N	Y	N	N	Y	N	Y	Y	Y	N	Y	Y
Report	Enns	A controlled quality improvement trial to reduce the use of physical restraints in older hospitalized adults.	2014	Health	Physical restraint in older hospitalized adults	Multicomponent strategy	Hospital	Canada	N	2	Medical units	4	4	1 month	Open cohort	Rate of restraint use	Generalised estimating equations with a Poisson distribution and log link	N	NA	Y	Y	N	Y	N	Y	Y	Y	N	N	Y	Y	Y	Y	N	N	N	N	Y	Y	N	N	Y	Y	N	N	N	N	N	Y
Report	Farrell	The effectiveness of a school-based curriculum for reducing violence among urban sixth-grade students.	1997	Education	Violence prevention	Curriculum	Schools	USA	N	1, 2	Schools	2	6	1 semester	Closed cohort	Violent behaviour scale	ANOVA	N	NA	Y	N	N	Y	N	Y	N	Y	N	N	Y	Y	Y	Y	N	N	N	N	N	N	N	N	N	N	N	Y	Y	Y	Y	Y
Report	Fernald	The Importance of Cash in Conditional Cash Transfer Programs for Child Health, Growth and Development:: An Analysis of Mexico's Oportunidades	2008	Social	Child development	Conditional cash transfer	Communities	Mexico	N	2, 16	Communities	2	506	19 months	Closed cohort	Height-for-age and BMI	Linear and logistic regression	N	Y	NA	N	Y	Y	Y	Y	N	Y	Y	Y	Y	Y	Y	NA	Y	Y	N	N	Y	Y	Y	N	Y	Y	Y	N	Y	Y	Y	Y
Report	Flannery	Initial behavior outcomes for the peacebuilders universal school-based violence prevention program.	2003	Education	Violence prevention	Multifaceted program	Schools	USA	N	10	Schools	2	8	1 year	Open cohort	Bespoke scales designed for this study	Hierarchical linear modelling	N	NA	Y	N	Y	N	Y	Y	Y	Y	Y	Y	Y	Y	Y	NA	N	N	N	N	N	Y	N	N	Y	N	Y	Y	Y	Y	Y	Y
Report	Fluttert	Preventing aggressive incidents and seclusions in forensic care by means of the 'Early Recognition Method'.	2010	Health	Aggression in forensic psychiatric care	Early recognition method	Forensic hospital	Netherlands	Unclear	NS	Wards	3	16	Unclear	Closed cohort	Number of seclusions	Wilcoxon signed rank	N	NA	Y	N	N	N	N	Y	Y	Y	N	Y	Y	Y	Y	NA	N	N	N	N	N	Y	N	N	N	N	N	Y	Y	N	Y	Y
Report	Foster	Practice development plans to improve the primary care management of acute asthma: Randomised controlled trial.	2007	Health	Asthma	Professional development plan	General practices	UK	N	NS	General practices	2	23	6 months	Closed cohort	Recording of peak flow compared to best/predicted	ANCOVA	1500	N	NA	N	Y	N	N	Y	N	Y	Y	N	Y	Y	Y	Y	Y	Y	Y	Y	Y	Y	Y	Y	Y	Y	Y	Y	Y	N	Y	Y
Report	Fuller	The Feedback Intervention Trial (FIT) - Improving Hand-Hygiene Compliance in UK Healthcare Workers: A Stepped Wedge Cluster Randomised Controlled Trial.	2012	Health	Hand-hygeine	Feedback	Hospitals	UK	Y	1, 3, 5	Hospitals	5	16	2 months	Open cohort	Direct blinded hand hygeine compliance	Mixed effects regression analysis	N	Y	NA	Y	Y	Y	N	Y	Y	Y	Y	Y	Y	Y	Y	Y	Y	N	N	N	Y	Y	Y	Y	Y	Y	Y	Y	Y	N	Y	Y
Report	Gnawali	The effect of community-based health insurance on the utilization of modern health care services: evidence from Burkina Faso.	2009	Health	Healthcare financing	Community health insurance	Villages	Burkina Faso	N	1, 2, 5, 16	Villages	3	33	1 year	Open cohort	Health service utilization	Hierarchical modelling, kernel matching method	990	Y	N	N	N	N	N	Y	Y	Y	Y	Y	Y	Y	Y	NA	Y	Y	N	Y	N	Y	N	N	N	N	N	N	Y	Y	Y	Y
Report	Golden	Uptake and Population-Level Impact of Expedited Partner Therapy (EPT) on Chlamydia trachomatis and Neisseria gonorrhoeae: The Washington State Community-Level Randomized Trial of EPT	2015	Health	Sexually Transmitted Infections	Expedited partner therapy	Local health jurisdictions	USA	Y	1	Local health jurisdictions	4	23	6-8 months	Continuous recruitment short exposure	Chlamydia test positivity and incidence of reported gonorrhea in women	Mixed effects generalised linear model and a marginal poisson regression model	N	N	N	Y	Y	Y	Y	Y	N	Y	Y	Y	Y	Y	Y	Y	Y	Y	Y	Y	Y	Y	Y	Y	Y	Y	Y	Y	Y	N	Y	Y
Report	Gozalo	Effect of the bathing without a battle training intervention on bathing-associated physical and verbal outcomes in nursing home residents with dementia: A randomized crossover diffusion study.	2014	Health	Dementia	Training intervention	Nursing homes	USA	N	NS	Nursing homes	2	6	2-4 months	Closed cohort	Rate of physical aggressive behaviours and rate of veral agressie or agitated behaviours during bathing	Fixed effects regression model	N	NA	Y	N	Y	N	N	Y	Y	Y	Y	Y	Y	Y	Y	Y	N	N	N	N	N	Y	N	N	Y	Y	N	Y	Y	N	Y	Y
Report	Gruber	A stepped wedge, cluster-randomized trial of a household UV-disinfection and safe storage drinking water intervention in rural Baja California Sur, Mexico.	2013	Health	Water contamination	Ultraviolet disinfection system	Communities	Mexico	N	2	Communities	6	24	2 months	Closed cohort	Percentage of households with contaminated drinking water and 7-day prevalence of diarrhea	Mixed effects model	10710	Y	NA	Y	Y	Y	N	Y	Y	Y	Y	Y	Y	Y	Y	NA	Y	Y	N	Y	Y	Y	N	Y	Y	Y	Y	Y	Y	N	Y	Y
Report	Happ	Quality of care and resource use among mechanically ventilated patients before and after an intervention to assist nurse-nonvocal patient communication.	2015	Health	Mechanically ventilated patients	Nurse training in nonvocal patient communication	Hospitals	USA	N	1, 5, 10	ICUs	6	6	3 months	Continuous recruitment short exposure	Pre and post training tests (nurses), phsyical restraint, heavy sedation, come-free days, apin documentation, any ICU-acquired pressure ulcer grade II or greater and unplanned endotracheal or tracheal tube (patients) extubation	Mixed effects linear regression model	1440	Y	N	Y	Y	Y	N	Y	Y	Y	N	Y	Y	Y	Y	Y	Y	Y	Y	Y	N	Y	N	N	Y	Y	Y	Y	Y	Y	Y	Y
Report	Haugen	Effect of the World Health Organization Checklist on Patient Outcomes: A Stepped Wedge Cluster Randomized Controlled Trial.	2015	Health	In-hopital morbidity, mortality and length of stay	Surgical safety checklist	Hospitals	Norway	N	1, 2, 3, 5, 10	Surgical specialities	5	5	3-4 weeks	Continuous recruitment short exposure	Major and minor complications and in-hospital mortality up to 30 days after surgery	Chi squared and t tests	2220	Y	NA	Y	Y	Y	N	Y	Y	Y	Y	Y	Y	Y	Y	Y	Y	N	Y	Y	Y	Y	N	Y	Y	Y	Y	Y	Y	Y	N	Y
Report	Horner	The longitudinal prevalence of MRSA in care home residents and the effectiveness of improving infection prevention knowledge and practice on colonisation using a stepped wedge study design.	2012	Health	MRSA	Staff education and training	Care homes	UK	N	NS	Care homes	3	68	8-10 months	Open cohort	Unclear	Random effects logistic regression model	N	NA	Y	Y	N	N	N	Y	Y	Y	Y	Y	Y	Y	N	NA	N	N	N	N	N	Y	N	N	Y	N	N	Y	Y	Y	Y	Y
Report	Husaini	A church-based program on prostate cancer screening for African American men: Reducing health disparities.	2008	Health	Prostate cancer	Education program	Churches	USA	N	NS	Churches	2	47	3 months	Closed cohort	Changes in perceived threat and knowledge of prostate cancer	Multilevel linear and logistic regression models	430	NA	Y	N	Y	N	N	Y	N	Y	Y	Y	Y	Y	Y	NA	N	N	N	N	N	N	N	N	N	N	N	N	N	N	Y	Y
Report	Leontjevas	A structural multidisciplinary approach to depression management in nursing-home residents: A multicentre, stepped-wedge cluster-randomised trial.	2013	Health	Depression	Multidisciplinary care programme	Nursing homes	Netherlands	N	6	Nursing home units	5	32	4 months	Open cohort	Proportion of residents per unit with a score of more than seven on the proxy-based Cornell scale for depression in dementia	Linear mixed model	720	NA	Y	Y	Y	Y	N	Y	Y	Y	Y	Y	Y	Y	Y	Y	Y	Y	Y	Y	Y	Y	Y	Y	Y	Y	Y	Y	Y	N	Y	Y
Report	Mhurchu	Effects of a free school breakfast programme on children's attendance, academic achievement and short-term hunger: results from a stepped-wedge, cluster randomised controlled trial.	2013	Education	Attendance	Free daily school breakfast programme	Schools	New Zealand	Y	15	Schools	4	16	1 term	Closed cohort	School attendance	Generalised linear and linear mixed models	400	N	NA	Y	Y	Y	N	Y	Y	Y	Y	Y	Y	Y	Y	Y	Y	Y	Y	Y	Y	Y	Y	Y	Y	Y	Y	Y	Y	N	Y	Y
Report	Monse	The effects of extraction of pulpally involved primary teeth on weight, height and BMI in underweight Filipino children. A cluster randomized clinical trial.	2012	Health	Dental caries	Extraction of severely decayed pulpally involved primary teeth	Day care centers	Phillipines	N	NS	Day care centers	2	13	4 months	Closed cohort	Unclear	Multi-level modelling	N	NA	Y	Y	Y	N	N	Y	Y	Y	N	Y	Y	Y	N	NA	N	N	Y	N	N	Y	N	N	Y	N	Y	Y	N	N	Y	Y
Report	Newhouse	A phased cluster-randomized trial of rural hospitals testing a quality collaborative to improve heart failure care: Organizational context matters.	2013	Health	Heart failure	Quality collaborative	Rural hospitals	USA	Unclear	NS	Hospitals	2	30	6 months	Unclear	Heart failure core measures	Generalised estimating equation autoregressive methods	N	N	NA	N	Y	N	N	Y	Y	Y	Y	N	Y	Y	Y	NA	N	N	N	Y	Y	Y	N	N	N	N	Y	N	Y	N	Y	Y
Report	Palmay	Hospital-wide rollout of antimicrobial stewardship: A stepped-wedge randomized trial.	2014	Health	Bacterial resistance	Antimicrobial stewardship	Hospital	Canada	N	1, 2, 11	ICUs	6	6	1 month	Continuous recruitment short exposure	Targeted antimicrobial utilization	Negative binomial regression model	N	NA	Y	Y	Y	Y	N	Y	Y	Y	N	Y	Y	N	Y	Y	N	N	N	N	Y	Y	N	Y	N	N	Y	N	Y	Y	N	Y
Report	Pearson	Evaluation of the Citizenship Evidence-Based Probation Supervision Program Using a Stepped Wedge Cluster Randomized Controlled Trial	2014	Social	Criminal Justice	Probation supervision program	Probation offices	UK	N	3, 16	Probation offices	6	12	2 months	Closed cohort	Re-offending rates	Kaplan Meier and discrete time survival analysis with a log-log link function	N	N	NA	Y	Y	Y	N	Y	Y	Y	Y	Y	Y	Y	Y	NA	N	N	N	N	N	Y	N	N	Y	N	Y	N	Y	Y	Y	Y
Report	Pickering	The implementation of clinician designed, human-centered electronic medical record viewer in the intensive care unit: A pilot step-wedge cluster randomized trial	2015	Health	Medical record keeping	Electronic medical record dashboard	Hospital	USA	N	NS	ICUs	4	4	2 weeks	Open cohort	Observed efficiency of data utilisation	Wilcoxon rank-sum tests	80	Y	NA	Y	Y	N	N	Y	N	Y	N	N	Y	Y	Y	Y	Y	N	Y	Y	N	Y	N	N	Y	N	N	Y	Y	N	Y	Y
Report	Priestly	Introducing Critical Care Outreach: A ward-randomised trial of phased introduction in a general hospital.	2004	Health	Critical care	Critical care outreach services	Hospitals	UK	N	1	Wards	8	16	4 weeks	Continuous recruitment short exposure	In-hospital mortality, length of stay	Logistic regression, cox proportional hazards regression model	2300	Y	Y	N	Y	N	N	Y	Y	Y	N	Y	Y	N	N	NA	Y	N	Y	Y	N	Y	N	Y	N	Y	Y	N	N	N	Y	Y
Report	Roy	Universal HIV testing in London tuberculosis clinics: A cluster randomised controlled trial.	2013	Health	HIV	Multifaceted intervention	TB clinics	UK	N	1, 8	Clinics	6	27	1 month	Continuous recruitment short exposure	HIV test acceptance	Mixed effects logistic regression moedel and Chi-squared tests	800	N	NA	Y	Y	N	N	Y	Y	N	Y	Y	Y	Y	Y	Y	Y	Y	Y	Y	Y	Y	N	Y	Y	N	Y	Y	Y	Y	Y	Y
Report	Schultz	Does a multidisciplinary nutritional intervention prevent nutritional decline in hospital patients? A stepped wedge randomised cluster trial.	2014	Health	Malnutrition	Multifaceted	Hospital	Australia	N	1, 2, 4, 7, 11, 14, 15	Wards	4	25	4 months	Continuous recruitment short exposure	Proportion of patients experiencing weightloss	Logistic regression model	400	N	NA	Y	Y	Y	N	Y	Y	Y	Y	Y	Y	Y	Y	Y	Y	Y	N	Y	Y	Y	Y	Y	Y	Y	N	Y	Y	Y	Y	Y
Report	Solomon	The Devon Active Villages Evaluation (DAVE) trial of a community-level physical activity intervention in rural south-west England: a stepped wedge cluster randomised controlled trial	2014	Health	Physical activity	Multifaceted community needs approach	Rural villages	UK	N	1, 2	Villages	4	128	12 weeks	Open cohort	Proportion of adults reporting sufficient physical activity to meet internationally recognised guidelines	Random effects linear regression and marginal logistic regression models	6400	N	NA	Y	Y	Y	Y	Y	Y	Y	Y	Y	Y	Y	Y	Y	Y	Y	Y	Y	Y	Y	N	N	Y	N	N	Y	Y	Y	N	Y
Report	Stern	Pressure ulcer multidisciplinary teams via telemedicine: a pragmatic cluster randomized stepped wedge trial in long term care.	2014	Health	Pressure ulcers	Enhanced multi-disciplinary teams	Long term care facilities	Canada	N	1, 2, 8	Long term care facilities	11	12	1 month	Other	Rate of reduction in pressure ulcer surface	Linear mixed effects model, Cox proportional hazard frailty models	1700	N	NA	Y	Y	Y	Y	Y	Y	Y	Y	Y	Y	Y	Y	Y	Y	Y	Y	Y	Y	Y	N	Y	Y	Y	Y	Y	Y	N	Y	Y
Report	van Beljouw	Implementing an outreaching, preference-led stepped care intervention programme to reduce late life depressive symptoms: results of a mixed-methods study	2014	Health	Depression	Stepped care programme; self-help course, exercise programme, life review, problem solving treatment, GP referral	General practices	Netherlands	N	1, 7	Groups of general practices	4	80	4 months	Closed cohort	Severity of Depression through the PHQ-9	Generalised estimating equations	450	NA	Y	N	N	Y	N	Y	N	N	N	Y	Y	Y	Y	NA	N	N	N	N	N	Y	N	N	Y	N	Y	Y	N	N	N	Y
Report	van de Steeg	Can an e-learning course improve nursing care for older people at risk of delirium: a stepped wedge cluster randomised trial.	2014	Health	Delirium	e-learning	Hospitals	Netherlands	N	1, 3, 4, 11	Hospitals	10	18	1 month	Continuous recruitment short exposure	Percentage of elderly patients screened for delirium	Multilevel linear regression	396	Y	NA	Y	Y	Y	N	Y	Y	Y	Y	Y	Y	Y	Y	Y	Y	Y	Y	Y	Y	Y	Y	N	Y	Y	N	Y	Y	N	Y	Y
Report	Weiner	A Web-based Generalist-Specialist System to Improve Scheduling of Outpatient Specialty Consultations in an Academic Center.	2009	Health	Scheduling of patients	Web-based system	Primary care clinics	USA	N	2	Clinics	36	36	Unclear	Continuous recruitment short exposure	Referral scheduling, time from referral to appointment	Chi-square tests and logistic regression model	N	NA	Y	N	N	Y	N	Y	N	Y	N	Y	Y	Y	Y	NA	N	N	Y	N	Y	Y	N	Y	N	N	N	N	Y	N	N	Y
Report	Winani	Use of A Clean Delivery Kit and Factors Associated with Cord Infection and Puerperal Sepsis in Mwanza, Tanzania.	2007	Health	Maternal and child health	Clean delivery kits	Surveillance sites	Tanzania	N	1, 2	Surveillance sites	10	10	6 weeks	Continuous recruitment short exposure	Incidence of cord infection and puerperal sepsis	Uni/multivariate analysis, logistic regression model	N	NA	Y	Y	N	N	N	Y	N	N	N	Y	Y	Y	Y	NA	N	N	Y	N	N	N	N	N	Y	N	N	Y	N	N	Y	Y
Report	Zwijsen	Coming to grips with challenging behavior: A cluster randomized controlled trial on the effects of a multidisciplinary care program for challenging behavior in Dementia.	2014	Health	Dementia	Multidisciplinary care programme	Nursing homes	Netherlands	N	1, 2, 6	Nursing homes	5	17	4 months	Open cohort	CMAI (questionaire) and NPI-NH (structured interview)	Linear mixed models and logistic mixed models	1596	Y	NA	Y	Y	Y	N	Y	N	Y	Y	Y	Y	Y	Y	Y	Y	Y	Y	Y	Y	Y	N	N	Y	Y	Y	Y	Y	Y	Y	Y
Other	Andersson	Proof of impact and pipeline planning: directions and challenges for social audit in the health sector.	2011	Health	Maternal morbidity	Video based education, health worker training, and improved care through visitation	Communities	Nigeria	N	7	Local government authorities	2	16	2 years	Open cohort	Maternal mortality rate	Mantel Haenszel procedure	N
Other	Andersson	A scaled up structural intervention program versus current national HIV prevention program	2013	Health	HIV	A structural intervention	Districts	Botswana	N	NS	Districts	Unclear	30	Unclear	Unclear	HIV sero-pervalance	Unclear	N
Other	Andersson	Rebuilding from Resilience: Research Framework for a Randomized Controlled Trial of Community-led Interventions to Prevent Domestic Violence in Aboriginal Communities	2010	Health	Domestic violence	Undetermined; could include education based interventions and improved service offerings	Women's shelters	Canada	N	1, 8	Women's shelters	2	12	Unclear	Open cohort	Unclear	Unclear	N
Other	Badenbroek	Design of the INTEGRATE study: effectiveness and cost-effectiveness of a cardiometabolic risk assessment and treatment program integrated in primary care	2014	Health	Cardiometabolic disease	Personalized Prevention Approach for CardioMetabolic Risk	General practices	Netherlands	N	2	General practices	4	4	1 year	Closed cohort	Number of newly detected patients with CMD at 1 year follow-up	Multivariable multilevel regression models	3605
Other	Banga	The impact of transmural multiprofessional simulation-based obstetric team training on perinatal outcome and quality of care in the Netherlands	2014	Health	Perinatal mortality	Nurse training in crew resource management	Hospitals	Netherlands	N	1, 2	Hospitals	4	4	16 weeks	Continuous recruitment short exposure	Adverse perinatal outcome	Mixed model	4000
Other	Beets	Physical Activity and Nutrition Intervention in Afterschool Programs	2014	Health	Physical activity and nutrition	Staff proffesional development, site snack modification	After school programmes	USA	N	NS	After school programmes	2	20	Unclear	Unclear	Change in proportion of children meeting physical activity policy	Unclear	1200
Other	Beets	Turn up the HEAT - Healthy Eating and Activity Time in Summer Day Camps	2014	Health	Healthy eating	Multi-component	Summer day camps	USA	N	NS	Summer day camps	2	20	1 year	Unclear	Changes in precentage of children meeting 60min of MVPA	Unclear	1000
Other	Bennett	The impact of an exercise physiologist coordinated resistance exercise program on the physical function of people receiving hemodialysis: A stepped wedge randomised control study.	2013	Health	Hemodialysis	Exercise programme	Hemodialysis clinicis	Australia	N	NS	Hemodialysis clinics	3	15	12 weeks	Open cohort	Objective Physical Function	ANCOVA	180
Other	Bernabe-Ortiz	Launching a salt substitute to reduce blood pressure at the population level: A cluster randomized stepped wedge trial in Peru.	2014	Health	Hypertension/High blood pressure	Salt substitute	Villages	Peru	N	2	Villages	6	6	6 months	Open cohort	Blood Pressure	Generalised estimating equations	N
Other	Blanchet	A Trial of an Integrated E-diagnosis Assessment to Improve the Management of Childhood Illnesses in Burkina Faso	2014	Health	Childhood Illnesses	E-diagnosis Assessment	Primary health care centres	Burkina Faso	N	NS	Unclear	Unclear	80	Unclear	Continuous recruitment short exposure	Adherence to IMCI guidelines	Unclear	7200
Other	Boulkedid	Impact of Monitoring Quality Indicators in Maternity Departments on Mother and Infant Health	2011	Health	Maternal and neonatal mortality and morbidity	Continuously monitroing quailty indicators	Maternity departments	France	N	2, 6	Hospitals	2	10	1 year	Continuous recruitment short exposure	Indicator of mother health and indicator of newborn health	Hierarchical models	7500
Other	Bouwsma	The Cost Effectiveness of a Tailored, Web-Based Care Program to Enhance Postoperative Recovery in Gynecologic Patients in Comparison With Usual Care: Protocol of a Stepped Wedge Cluster Randomized Controlled Trial	2014	Health	Postoperative recovery in gynecologic patients	Care program including new guidance at the cluster and individual levels	Hospitals	Netherlands	N	1, 9	Hospitals	9	9	2 months	Continuous recruitment short exposure	Sick leave duration until full sustainable return to work	Cox regression analyses and generalized linear longitudinal mixed models	454
Other	Brady	Stroke Oral healthCare pLan Evaluation	2013	Health	Stroke	Enhance oral health care to reduce pneumonia incidence	Stroke care settings	UK	N	NS	Wards	Unclear	4	Unclear	Continuous recruitment short exposure	Pneumonia	Unclear	400
Other	Brimblecome	Stores Healthy Options Project in Remote Indigenous Communities (SHOP@RIC): a protocol of a randomised trial promoting healthy food and beverage purchases through price discounts and in-store nutrition education.	2013	Health	Diet	Nutrition education and price discount on fruit and vegetables	Communities	Australia	N	2	Communities	4	20	2 months	Closed cohort	Per capita daily weight of combined fruit and veg purchased	Mixed model	N
Other	Britton	EAT: A stepped wedge cluster randomised trial to improve nutrition in head and neck cancer patients undergoing radiotherapy.	2012	Health	Head and neck cancer	Health behaviour intervention to reduce malnutrition	Radiotherapy departments	Australia	Unclear	NS	Radiotherapy departments	5	5	4 months	Unclear	Nutritional status 12 weeks post treatment	ANCOVA	400
Other	Brown	Clinician-led improvement in cancer care (CLICC)--testing a multifaceted implementation strategy to increase evidence-based prostate cancer care: phased randomised controlled trial--study protocol.	2014	Health	Prostate cancer	Multifaceted educational intervention	Hospitals	Australia	N	1, 2, 5	Hospitals	5	9	2 months	Continuous recruitment short exposure	Patient referral to radiation oncology	Generalised estimating equations	404
Other	Carroll	POC - Transfusion Algorithm Cardiac Study	2014	Health	Blood transfusions	POC-based algorithm	Hospitals	Canada	N	NS	Hospitals	Unclear	10	Unclear	Continuous recruitment short exposure	Avoidance of redblood cell transfusion during hospitalization	Unclear	7000
Other	Castellon	Enhanced Access to HIV Care for Drug Users in San Juan, Puerto Rico	2013	Health	HIV	Enhanced access to care	Drug users in San Juan	Puerto Rico	N	NS	Neighbourhoods	5	5	6 months	Other	HIV virologic suppression	Unclear	400
Other	Chavane	Implementation of evidence-based antenatal care in Mozambique: a cluster randomized controlled trial: study protocol	2014	Health	Antenatal care	Multifaceted intervention to increase evidence-based practices; including kits and training sessions	ANC clinics	Mozambique	N	1, 2	ANC clinics	10	10	2 months	Open cohort	Delivery of selected health care practices	Generalised linear mixed model	N
Other	Christensen	Feeling Well with True Colours for community patients	2013	Health	Mental illness	Education and user-friendly technology	Oxford health NHS foundation trust	UK	N	NS	Community mental health teams	Unclear	11	Unclear	Unclear	HoNOS score	Unclear	500
Other	Davidson	Measuring and Monitoring Patient Informed Clinical Outcomes In Psychological Therapy Supervision	2012	Health	Ppyschological disorders	Providing feedback on patient progress through a supervision process	Patients seen for psychological therapry in the NHS	UK	N	NS	Unclear	Unclear	Unclear	Unclear	Unclear	Overall CORE-OM score	Mixed model	470
Other	Doyle	Reconciling research and implementation in micro health insurance experiments in India: study protocol for a randomized controlled trial	2011	Health	Healthcare financing	Education and CBHI Scheme	Villages	India	N	1, 3	Carefully constructured groups of villages	3	15	Unclear	Closed cohort	Number of consultations with a physician per case	Unclear	8933
Other	Dreischulte	A cluster randomised stepped wedge trial to evaluate the effectiveness of a multifaceted information technology-based intervention in reducing high-risk prescribing of non-steroidal anti-inflammatory drugs and antiplatelets in primary medical care: the DQIP study protocol.	2012	Health	High-risk prescribing	Multi-faceted; education, informatics and financial incentive based	Medical practices	UK	N	2, 4	Medical practices	10	40	4 weeks	Open cohort	Composite of prescribing outcomes	Non-linear mixed model	N
Other	Emond	Improving the implementation of perioperative safety guidelines using a multifaceted intervention approach: protocol of the IMPROVE study, a stepped wedge cluster randomized trial	2015	Health	Perioperative safety	Multifaceted implementation strategy e.g. including educational meetings	Hospitals	Netherlands	N	1, 8	Hospitals	3	9	7 months	Continuous recruitment short exposure	Guideline adherence according to PSIs	Multilevel linear and logistic regression	1800
Other	Everingham	A medical trial looking at ways to improve the quality and delivery of care for patients having emergency abdominal surgery	2014	Health	Emergency laparotomy	Quality improvement project to implement a modified version of the RCS integrated care pathway	Hospitals	UK	N	1, 5, 11, 12	Geographically based groups of hospitals	15	90	5 weeks	Continuous recruitment short exposure	All cause morality at 90 days following surgery	Unclear	27500
Other	Fearon	Evaluation of a telephone hotline to enhance rapid outpatient assessment of minor stroke or TIA: A stepped wedge cluster randomised control trial.	2013	Health	Stroke	Telephone hotline	GP practices	UK	Unclear	NS	Groups of general practices based on postcode	6	6	6 weeks	Continuous recruitment short exposure	Reduction in time from referral to specialist stroke team input	Unclear	N
Other	Flenady	'Moving with the times': Raising awareness of decreased fetal movements (DFM) in australia and New Zealand through a stepped-wedge cluster RCT.	2014	Health	Stillbirth	Multi-faceted	Maternity hospitals	Multiple	N	1, 2, 10	Groups of hopitals	8	8	4 months	Continuous recruitment short exposure	Stillbirth at 28 weeks or more gestation	Unclear	256700
Other	Gambia Hepatitis Study Group	The Gambia Hepatitis Intervention Study.	1987	Health	Hepatocellular carcinoma and other liver diseases	Vaccination	Regions	The Gambia	Y	1, 2, 5	Vaccination team	17	17	3 months	Continuous recruitment short exposure	Incidences of hepatocellular carcinoma and chronic liver disease	Unclear	120000
Other	Gucciardi	Will Mobile Diabetes Education Teams (MDETs) in primary care improve patient care processes and health outcomes? Study protocol for a randomized controlled trial.	2012	Health	Diabetes	Educational	Primary care sites	Canada	N	1	Primary care physicians	4	12	6 months	Open cohort	Difference in proportion of patients achieving recommended HbA1c target	Generalised linear mixed model	1200
Other	Guertin	Management of Albuminuria in Hypertensive Diabetics	2013	Health	Albuminuria in hypertensive diabetics	Point of Care Testing for urine albumin	Family practice clinics	Canada	Y	NS	Unclear	Unclear	Unclear	Unclear	Unclear	Stabilisation or improvement of urine albumin extrcretion status	Unclear	280
Other	Havlir	The START (a Streamlined ART Initiation Strategy) Study	2013	Health	HIV	Multi-faceted intervention to catalyze ART initiation	Clinics	Uganda	N	NS	Clinics	6	24	6 months	Unclear	Cumulative incidence of ART initiation in newly treatment eligible HIV-infected patients receiving care under routine program conditions	Cox proportional hazard's models	12500
Other	Hill	A stepped-wedge cluster randomised controlled trial for evaluating rates of falls among inpatients in aged care rehabilitation units receiving tailored multimedia education in addition to usual care: A trial protocol.	2014	Health	Falling in inpatients	Education	Subacute units	Australia	N	13	Subacute units	4	8	10 weeks	Continuous recruitment short exposure	Patient falls during hospitalisation	Logistic regression model	3744
Other	Huffman	Study of a Quality Improvement Toolkit in Kerala, India, Among Hospitals Treating Acute Coronary Syndrome Patients	2014	Health	Acute coronary syndrome	Quality improvement toolkit	Hospitals	India	N	NS	Hospitals	5	Unclear	4 months	Continuous recruitment short exposure	30-Day major adverse cardioascular events	Unclear	15750
Other	Hutchings	Predictive risk stratification model: A progressive cluster-randomised trial in chronic conditions management (PRISMATIC) research protocol.	2013	Health	Emergency hospital admission	Predictive risk stratification tool	General practices	UK	N	1, 3, 4, 5	General practice clusters	11	11	1 month	Closed cohort	Number of emergency admissions to hospital	Generalised linear model	2400
Other	Jarvik	Trial of Inserting Prevalence Information Into Lumbar Spine Imaging Reports	2013	Health	Lumbar pain	Inserting epidemiological evidencein lumbar spine imaging reports	Primary care clinics	USA	N	1, 5	Primary care clinics	Unclear	4	Unclear	Continuous recruitment short exposure	Relative value unit for spine-related interventions	Unclear	250000
Other	Johnson	Community Choirs To Promote Healthy Aging; Community of Voices Chorus	2013	Health	Aging	Choir program	Senior centres	USA	N	NS	Senior centres	2	12	6 months	Closed cohort	Physical function, cognitive function, depressive symptoms	Unclear	450
Other	Jordan	Nurse-led medication monitoring for patients with dementia and adverse events	2013	Health	Dementia	Adverse drug reaction profile	Care homes	UK	N	NS	Care homes	5	5	1 month	Closed cohort	Problems found and actions taken at each step in the trial	Unclear	50
Other	Kenyon	Stepped wedge cluster trial to evaluate training to community midwives to improve membrane sweeping to reduce induction of labour.	2014	Health	Induction of labour	Nurse training	Midwifery teams	UK	Unclear	NS	Unclear	Unclear	10	Unclear	Continuous recruitment short exposure	Number of women offered and accepting membrane sweeping	Generalised linear mixed model	2864
Other	Keriel-Gascou	Evaluation of an interactive program for preventing adverse drug events in primary care: study protocol of the InPAct cluster randomised stepped wedge trial.	2013	Health	Adverse drug events	Interactive educating programe	General practices	France	N	2, 5, 6, 10, 11	Groups of general practioners	4	8	3 months	Continuous recruitment short exposure	Reporting of adverse drug events by patients	Mixed logistic model	1200
Other	Kjeken	Evaluation of a structured goal planning and tailored follow-up programme in rehabilitation for patients with rheumatic diseases: Protocol for a pragmatic, stepped-wedge cluster randomized trial.	2014	Health	Rheumatic diseases	Goal planning and follow-up programme in rehabilitation	Rehabilitation centres	Norway	N	1, 2	Rehabilitation centres	6	6	5 weeks	Continuous recruitment short exposure	Goal attainment and health-related quality of life	Generalised linear repeated measures mixed model	312
Other	Koberlein-Neu	WestGem study: WESTphalian study on a medication therapy management and home care based intervention under Gender specific aspects in Elderly Multimorbid patients	2013	Health	Multimorbidity	Medication therapy management	GP surgeries	Germany	N	2, 3	General practice surgeries	3	14	3 months	Open cohort	Change in the medication appropriateness index scores	Mixed model	240
Other	Krolak-Salmon	Impact of Multidisciplinary Program on Falls in Elderly Inpatients	2011	Health	Falls in elderly patients	Multidisciplinary prevention program	Hospices	France	N	NS	Unclear	Unclear	Unclear	Unclear	Open cohort	Incidence of falls among elderly inpatients	Unclear	1852
Other	Kullgren	Primary Care Clinician Commitments to Choosing Wisely	2014	Health	Mixed	3 choosing wisely recommendations	Clinics	USA	N	NS	Clinics	6	6	1 month	Closed cohort	Composite rates of ordering 3 potentially low-value services in primary care visits by adult patients	Unclear	60
Other	Kurth	Testing and Linkage to Care for Injecting Drug Users in Kenya	2012	Health	Injecting drug users	Needle exchange program	NSP service sites	Kenya	N	NS	NSP service sites	5	Unclear	6 months	Unclear	Linkage to care and time to ART, community viral load, retention in care	Linear mixed effects model	4500
Other	Leff	Using Community-Based Participatory Research to Develop the PARTNERS Youth Violence Prevention Program	2010	Social	Violence prevention	Educational program	After school sites	USA	N	1, 2	After-school sites	3	6	1 year	Unclear	Unclear	Unclear	N
Other	Lenguerrand	The thistle study: a stepped-wedge clustered trial of an intrapartum emergencies training package in Scottish maternity units	2013	Health	Perinatal care	Intrapartum emergencies training package	Maternity units	UK	Unclear	NS	Groups of maternity units	3	12	6 months	Continuous recruitment short exposure	Prevalence of babies born with a low Apgar score	Generalised linear mixed model	N
Other	Li	Rational and design of a stepped-wedge cluster randomized trial evaluating quality improvement initiative for reducing cardiovascular events among patients with acute coronary syndromes in resource-constrained hospitals in China.	2014	Health	Acute coronary syndromes	Quality improvement intervention	Hospitals	China	N	1, 11	Hospitals	4	104	6 months	Open cohort	Incidence of in-hospital major adverse cardiovascular events	Logistic regression model and generalised estimating equations	25000
Other	Liddy	Improved delivery of cardiovascular care (IDOCC) through outreach facilitation: study protocol and implementation details of a cluster randomized controlled trial in primary care.	2011	Health	Cardiovascular care	Practice outreach facilitation	Primary care practices	Canada	Y	1, 2, 11, 13	Groups of practices by region	3	83	1 year	Closed cohort	Quality of care score	General linear mixed effects model	1782
Other	Limmathurotsakul	A Single-blind Stepped Wedge Cluster Randomized Controlled Behaviour Change Trial to Determine Effectiveness of Prevention Programme of Melioidosis in Diabetics in Ubon Ratchathani, Northeast Thailand	2014	Health	Melioidosis in diabetics	Behaviour change prevention programme	Ubon Ratchathani	Thailand	N	NS	Diabetic clinics	3	30	1 year	Other	Overall hospital admissions due to infectious diseases and culture-confirmed melioidosis	Unclear	9000
Other	Marshall	Mixed methods evaluation of targeted case finding for cardiovascular disease prevention using a stepped wedged cluster RCT.	2012	Health	Cardiovascular disease	Targeted case finding	General practices	UK	N	2	Groups of general practices	Unclear	32	Unclear	Closed cohort	Number of high risk patients started on at least one preventive treatment	Mixed logistic regression model	6241
Other	Meya	Operational Research for Cryptococcal Antigen Screening	2012	Health	HIV	Cryptococcal antigen screening	Unclear	Uganda	N	NS	Unclear	Unclear	Unclear	Unclear	Continuous recruitment short exposure	Retention in care	Unclear	3000
Other	Mills	High-Sensitivity Troponin in the Evaluation of Patients With Acute Coronary Syndrome	2013	Health	Acute coronary syndrome	Trponin test to identify myocardial infarction	Secondary and tertiary care hospitals	UK	N	NS	Hospitals	2	10	6 months	Continuous recruitment short exposure	One-year rate of cardiovascular death or recurrent myocardial infarction	Unclear	23800
Other	Mouchoux	Impact of a multifaceted program to prevent postoperative delirium in the elderly: the CONFUCIUS stepped wedge protocol.	2011	Health	Postoperative delirium	Multifaceted program	Hospitals	France	N	1, 2, 5, 11	Wards	3	3	6 months	Continuous recruitment short exposure	Postoperative delirium rate within 7 days after surgery	Logistic regression model	360
Other	Muntinga	Implementing the chronic care model for frail older adults in the Netherlands: study protocol of ACT (frail older adults: care in transition).	2012	Health	Chronic care	Geriatric care model	Primary care practices	Netherlands	N	1, 4, 11	Primary care practices	4	35	6 months	Closed cohort	Quality of life assessed through a questionnaire	Multi-level regression model	1200
Other	Nanayakkara	Prehospital Antibiotics Against Sepsis	2013	Health	Sepsis	Prehospital antibiotics	Hospitals	Netherlands	N	NS	Unclear	Unclear	Unclear	Unclear	Continuous recruitment short exposure	Mortality	Unclear	2200
Other	None provided	Hand Hygiene Intervention Study	2013	Health	Infection	Multimodal intervention to improve hand hygeine	Hospital	Thailand	Unclear	1, 2	Wards	Unclear	Unclear	Unclear	Open cohort	Directly observed hand hygeine compliance	Unclear	58
Other	Norman	Promoting Awareness Fetal Movements to Reduce Fetal Mortality Stillbirth, a Stepped Wedge Cluster Randomised Trial.	2013	Health	Fetal mortality	Package of care to increase pregnant women's awareness of the need for prompt reporting of decreased fetal movements	Hospitals	Multiple	N	NS	Hospitals	Unclear	Unclear	Unclear	Unclear	Rate of stillbirth	Unclear	110000
Other	Odeny	Texting to Improve Testing (TextIT)	2015	Health	HIV	Text messaging to improve testing	Clinics	Kenya	N	NS	Health facilities	2	20	6 months	Open cohort	Postpartum retention in prevention of mother-to-child HIV transmission programs, infant HIV testing by DNA PCR within 8 weeks after birth, cost-effectiveness of TextIT	Unclear	2508
Other	Page	Cambodia Integrated HIV and Drug Prevention Implementation Program	2013	Health	HIV and drug prevention	Multi-faceted programme	Unclear	Cambodia	N	2	Provinces	Unclear	10	Unclear	Open cohort	HIV risk behaviour	Unclear	1200
Other	Palmer	The CORE study protocol: a stepped wedge cluster randomised controlled trial to test a co-design technique to optimise psychosocial recovery outcomes for people affected by mental illness in the community mental health setting	2015	Health	Mental illness	User engagement through experience based co-design	Mental health service providers	Australia	N	1, 2, 6, 10	Mental health service provider teams	3	11	9 months	Open cohort	Improvement in recovery score	Linear mixed models and generalised lienar mixed models	330
Other	Poldervaart	The impact of the HEART risk score in the early assessment of patients with acute chest pain: Design of a stepped wedge, cluster randomised trial.	2013	Health	Acute chest pain	Risk score	Hospitals	Netherlands	N	1, 5, 9	Hospitals	10	10	1 month	Continuous recruitment short exposure	Occurrence of major adverse cardiac events	Generalised linear mixed model	6600
Other	Praveen	A multifaceted strategy using mobile technology to assist rural primary healthcare doctors and frontline health workers in cardiovascular disease risk management: protocol for the SMARTHealth India cluster randomised controlled trial.	2013	Health	Cardiovascular disease	Mobile technology to assist disease risk management	Villages	India	N	1, 13	Groups of primary health care centres	3	54	6 months	Closed cohort	Proportion of people meeting guideline recommended blood pressure targets	Mixed effects models	10800
Other	Rasmussen	Prevention of low back pain and its consequences among nurses' aides in elderly care: a stepped-wedge multi-faceted cluster-randomized controlled trial.	2013	Health	Low back pain	Multi-faceted work place intervention	Nursing homes	Denmark	N	2, 3, 4	Groups of working teams	4	4	3 months	Closed cohort	Low back pain and its consequences measured monthly by text messages	Generalised linear mixed model	594
Other	Reuther	Effect evaluation of two types of dementia-specific case conferences in German nursing homes (FallDem) using a stepped-wedge design: Study protocol for a randomized controlled trial.	2014	Health	Dementia	Case conferences	Nursing homes	Germany	N	1, 2, 8, 11	Nursing homes	5	12	3 months	Open cohort	Reduction of challenging behaviour	Bayesian mixed effect model	360
Other	Rosett	Wellness Program Implementation: School & Student Toolkits	2014	Health	Weight	Toolkit	High schools	USA	N	NS	High schools	Unclear	Unclear	1 year	Unclear	Change in key behaviours	Unclear	14520
Other	Scales	Premature Termination of Resuscitation in Survivors of Cardiac Arrest	2011	Health	Cardiac arrest	Knowledge translation strategies to improve neuroprognostication	Hospitals	Canada	N	NS	Hospitals	4	18	5 months	Continuous recruitment short exposure	Effective knowledge strategy	Unclear	560
Other	Shah	Effectiveness of Active Case Finding of Household Contacts in a Routine Tuberculosis (TB) Control Program	2014	Health	TB	Case-finding program	Households	Peru	N	NS	Health centres	Unclear	35	Unclear	Continuous recruitment short exposure	Yield of secondary TB cases	Generalised estimating equations	1900
Other	Stille	Adapting Practice-Based Intervention Research to Electronic Environments: Opportunities and Complexities at Two Institutions	2013	Health	Patient referrals	Tool to coordinate referrals between parents and physicians	Nine pediatric primary care and subspeciality practices	USA	N	NS	Practices	Unclear	9	Unclear	Continuous recruitment short exposure	Number of days of lost parent work time or child school time, numberof child ER visits and number of unplanned hospital admissions in the 3 months afer the specialty visit	Unclear	400
Other	Strijbos	Design and methods of the Hospital Elder Life Program (HELP), a multicomponent targeted intervention to prevent delirium in hospitalized older patients: efficacy and cost-effectiveness in Dutch health care.	2013	Health	Delirium	Multicomponent targeted intervention in hospitalized older patients	Hospital care system	Netherlands	N	1, 2, 5	Care units	4	8	3 months	Continuous recruitment short exposure	Incidence of delirium	Multi-level analyses	1081
Other	Stringer	Protocol-driven primary care and community linkages to improve population health in rural Zambia: the Better Health Outcomes through Mentoring and Assessment (BHOMA) project	2013	Health	Mortality	Quality improvement intervention	Lusaka province	Zambia	N	13	Primary health care facilities	7	42	3 months	Open cohort	Age-adjusted overall mortality and under-5 mortality	Generalised linear model	113400
Other	Sylvie	283 Impact of a training and organisational program on the care of CVA in the acute phase.	2010	Health	Stroke	Training programme on thrombolysis	Emergency departments	France	Unclear	1	Emergency departments	4	12	Unclear	Continuous recruitment short exposure	Unclear	Mixed effect logistic regression	300
Other	Thompson	PCORI-1310-06998 Trial of a Decision Support Intervention for Patients and Caregivers Offered Destination Therapy Heart Assist Device	2015	Health	Heart failure	Decision aid to help people offered DT LVAD	Medical centres	USA	N	NS	Medical centres	Unclear	6	Unclear	Continuous recruitment short exposure	Reach, effectiveness, adoption, implementation and maintanence of intervention	Unclear	400
Other	Tielsch	Designs of two randomized, community-based trials to assess the impact of alternative cookstove installation on respiratory illness among young children and reproductive outcomes in rural Nepal	2014	Health	Acute lower respiratory infections	Alternative stove designs	Rural district	Nepal	N	NS	Sectors of households	12	12	1 month	Closed cohort	Incidence of ALRI among children <36 months	Generalised mixed effects model	2350
Other	Tirlea	Investigation of the effectiveness of the "Girls on the Go!" program for building self-esteem in young women: trial protocol	2013	Health	Body image	Multi-faceted programme	Schools	Australia	N	10	Schools	2	6	1 term	Closed cohort	Rosenberg self-esteem scale and eating disorders assessment	Linear mixed model	60
Other	Toftegaard	A geographical cluster randomised stepped wedge study of continuing medical education and cancer diagnosis in general practice	2014	Health	Cancer	Continuing medical education and early diagnosis	General practices in a Danish region	Denmark	N	1	Geographical groups of general practices	8	8	3 weeks	Continuous recruitment short exposure	Primry care interval and GP referral rate on cancer suspicion	Generalised linear random effets model	1653
Other	Turner	A randomised trial of a psychosocial intervention for cancer patients integrated into routine care: The PROMPT study (promoting optimal outcomes in mood through tailored psychosocial therapies).	2011	Health	Cancer	Psychosocial care	Clinical sites	Australia	N	11	Clinical sites	5	5	10 weeks	Continuous recruitment short exposure	Change in HADS score	Generalised estimating equations	600
Other	van der Kooi	O083: Prohibit (preventing hospital-acquired infections by intervention and training): preliminary results of a European multi-center study on the effectiveness of a hand hygiene campaign and a central venous catheter bundle	2013	Health	Hospital-acquired infections	Hand hygeine campaign and a central venous catheter bundle	Hospitals	Multiple	Unclear	NS	Hospitals	5	14	3 month	Unclear	CVC-related bloodstream infection	Multivariate Cox regression	N
Other	van Holland	Sustained employability of workers in a production environment: design of a stepped wedge trial to evaluate effectiveness and cost-benefit of the POSE program	2012	Health	Sustained employability	Assessments and counselling	Meat processing company	Netherlands	N	5	Company plants	5	5	20 weeks	Closed cohort	Work ability, productivity and absenteeism	Multi-level regression	176
Other	Ward	STI in remote communities: improved and enhanced primary health care (STRIVE) study protocol: a cluster randomised controlled trial comparing 'usual practice' STI care to enhanced care in remote primary health care services in Australia	2013	Health	STIs	Multi-faceted sexual health quality imprvoement programme	Remote primary health care services	Australia	N	1	Communities	3	24	1 year	Continuous recruitment short exposure	Prevelance of chlamydia and gonorrhoea and trichomonas in Aboriginal residents aged 16-34	Generalised linear mixed model	N
Other	White	Improving Patient and Family Centered Care in Advanced Critical Illness	2013	Health	Advanced critical illness	Multi-faceted to improve patient care	ICUs	USA	N	NS	ICUs	Unclear	5	Unclear	Continuous recruitment short exposure	Hospital anxiety and depression scale	Unclear	1000
Other	Williams	The effect of work-based mentoring on patient outcome in musculoskeletal physiotherapy: study protocol for a randomised controlled trial	2014	Health	Musculoskeletal physiotherapy	Work-based mentoring	Musculoskeletal outpatient departments	UK	N	1, 2, 6, 10, 11	Departments	3	3	Unclear	Other	Patient-specific functional scale	Linear mixed model	720
Other	Williamson (The CIPHER Investigators)	Supporting Policy In health with Research: an Intervention Trial (SPIRIT) protocol for a stepped wedge trial	2014	Health	Implementing research	Multi-faceted program	Health policy agencies	Australia	N	10	Health policy agencies	3	6	6 months	Closed cohort	Measure of extent to which research engagement actions are undertaken and research is used in development of policy	Generalised linear model	144
Other	Wilson-Smith	Does Menstrual Hygiene Matter? Investigating the Impact of a Menstrual Hygiene Program on Ugandan Girls' School Absenteeism	2014	Health	Menstrual hygeine	Multi-faceted program	Schools	Uganda	N	5	Schools or predefined groups of schools in close proximity	2	Unclear	6 months	Closed cohort	Number of days of school missed per month	Unclear	40
Other	Zhan	Strengths and weaknesses of a stepped wedge cluster randomized design: Its application in a colorectal cancer follow-up study.	2014	Health	Colorectal cancer	Follow-up CEA measurements	Hospitals	Netherlands	N	1, 2, 4	Hospitals	5	5	3 months	Continuous recruitment short exposure	Proportion of resectable recurrences among all recurrences	Conditional logistic regression model	4000
[truncated: 18 more columns]

## Sheet: Key to "Motivation for..."
Category indicator	Meaning
1	Desired everyone to receive the intervention, on ethical or equity grounds
2	Practical/logistical constraints
3	Prevent contamination bias
4	Encourage patient or cluster participation
5	Methodoligcal relating to the use of clusters e.g. provides a comparison group at each time period, allows within and between cluster comparisons
6	More efficient/powerful design
7	Allows tuning of the intervention throughout the trial
8	Incorporates randomisation
9	Allows the study of barriers to future implementation
10	Needed cluster level randomisation
11	Allows adjustification for/the study of time effects
12	Allows cluster level delivery, with patient level evaluation
13	A rigorous design i.e. it is randomised and controlled
14	Reduces the impact of the ICC upon power
15	Allows for a trial to be conducted within routine practice
16	It is social and politically acceptable
NS	None stated

## Sheet: All screened records
ID	AU	TI	SO	YR	NO	PB	KY	CC	DOI	US	VL	PG	PM	PT	Search.Engine	AU.Sort	Manual.AU	Manual.TI	TI.Sort	DESCRIPTORS	PMID	T1	JF	A1	IS	SP	EP	Y1	CY	AD	SN	N2	KW	M3	DO	ER	r...?...60...Furthermore..the.children.who.received.the.intervention.made.significantly.more.positive.statements.about.the.game.and.about.their.partners..p....02..r...?...34..suggesting.that.the.intervention.increased.their.confidence.and.enjoyment...PsycINFO.Database.Record..c..2014.APA..all.rights.reserved.	T2	A2	PUB.DET	PMCID	AU.Adj	Database	Accession.Number	Author	Title	Source	Status	Document.Type
NA		[No title available]	NA	NA	NA	NA	NA	NA	NA	NA	NA	NA	NA	NA	NCBI				[No title available]	NA	NA	NA	NA	NA	NA	NA	NA	NA	NA	NA	NA	NA	NA	NA	NA	NA	NA	NA	NA	Sex Transm Infect. 2006 June; 82(Suppl 2): A1???A6.	PMC2563890		NA	NA	NA	NA	NA	NA	NA
NA		111th Annual Meeting of the American Association of Colleges of Pharmacy, Seattle, Washington, July 10-14, 2010	NA	NA	NA	NA	NA	NA	NA	NA	NA	NA	NA	NA	NCBI				111th Annual Meeting of the American Association of Colleges of Pharmacy, Seattle, Washington, July 10-14, 2010	NA	NA	NA	NA	NA	NA	NA	NA	NA	NA	NA	NA	NA	NA	NA	NA	NA	NA	NA	NA	Am J Pharm Educ. 2010 June 15; 74(5): 96.	PMC2907861		NA	NA	NA	NA	NA	NA	NA
NA		48th Annual General Conference: ADDRESS BY THE PRESIDENT, DR. FRANCIS ADU-ABABIO AT THE OPENING CEREMONY ON FRIDAY, NOVEMBER 10, 2006	NA	NA	NA	NA	NA	NA	NA	NA	NA	NA	NA	NA	NCBI				48th Annual General Conference: ADDRESS BY THE PRESIDENT, DR. FRANCIS ADU-ABABIO AT THE OPENING CEREMONY ON FRIDAY, NOVEMBER 10, 2006	NA	NA	NA	NA	NA	NA	NA	NA	NA	NA	NA	NA	NA	NA	NA	NA	NA	NA	NA	NA	Ghana Med J. 2006 December; 40(4): 154???156.	PMC1868011		NA	NA	NA	NA	NA	NA	NA
NA	NA	NA	NA	NA	NA	NA	NA	NA	NA	NA	NA	NA	NA	NA	ClinicalTrials		NA	NA	A Bicycle Training Intervention	NA	NA	NA	NA	NA	NA	NA	NA	NA	NA	NA	NA	NA	NA	NA	NA	NA	NA	NA	NA	NA	NA	NA	NA	NA	NA	A Bicycle Training Intervention	NA	NA	NA
NA	NA	NA	NA	NA	NA	NA	NA	NA	NA	NA	NA	NA	NA	NA	ClinicalTrials		NA	NA	A Pilot Study Evaluating a Multidisciplinary Chronic Pain Group Therapy in a Primary Care Setting	NA	NA	NA	NA	NA	NA	NA	NA	NA	NA	NA	NA	NA	NA	NA	NA	NA	NA	NA	NA	NA	NA	NA	NA	NA	NA	A Pilot Study Evaluating a Multidisciplinary Chronic Pain Group Therapy in a Primary Care Setting	NA	NA	NA
NA		A programme for controlling acute respiratory infections in children: Memorandum from a WHO Meeting	NA	NA	NA	NA	NA	NA	NA	NA	NA	NA	NA	NA	NCBI				A programme for controlling acute respiratory infections in children: Memorandum from a WHO Meeting	NA	NA	NA	NA	NA	NA	NA	NA	NA	NA	NA	NA	NA	NA	NA	NA	NA	NA	NA	NA	Bull World Health Organ. 1984; 62(1): 47???58.	PMC2536276		NA	NA	NA	NA	NA	NA	NA
NA	NA	NA	NA	NA	NA	NA	NA	NA	NA	NA	NA	NA	NA	NA	ClinicalTrials		NA	NA	A Randomized Controlled Trial Using the TAPESTRY Approach to Care for Older Adults	NA	NA	NA	NA	NA	NA	NA	NA	NA	NA	NA	NA	NA	NA	NA	NA	NA	NA	NA	NA	NA	NA	NA	NA	NA	NA	A Randomized Controlled Trial Using the TAPESTRY Approach to Care for Older Adults	NA	NA	NA
NA	NA	NA	NA	NA	NA	NA	NA	NA	NA	NA	NA	NA	NA	NA	ClinicalTrials		NA	NA	A Self-Administered Maneuver to Relieve Symptoms Suggestive of Benign Prostatic Hyperplasia	NA	NA	NA	NA	NA	NA	NA	NA	NA	NA	NA	NA	NA	NA	NA	NA	NA	NA	NA	NA	NA	NA	NA	NA	NA	NA	A Self-Administered Maneuver to Relieve Symptoms Suggestive of Benign Prostatic Hyperplasia	NA	NA	NA
NA	NA	NA	NA	NA	NA	NA	NA	NA	NA	NA	NA	NA	NA	NA	ClinicalTrials		NA	NA	A Single-blind Stepped Wedge Cluster Randomized Controlled Behaviour Change Trial to Determine Effectiveness of Prevention Programme of Melioidosis in Diabetics in Ubon Ratchathani, Northeast Thailand	NA	NA	NA	NA	NA	NA	NA	NA	NA	NA	NA	NA	NA	NA	NA	NA	NA	NA	NA	NA	NA	NA	NA	NA	NA	NA	A Single-blind Stepped Wedge Cluster Randomized Controlled Behaviour Change Trial to Determine Effectiveness of Prevention Programme of Melioidosis in Diabetics in Ubon Ratchathani, Northeast Thailand	NA	NA	NA
NA	NA	NA	NA	NA	NA	NA	NA	NA	NA	NA	NA	NA	NA	NA	ClinicalTrials		NA	NA	A Study of Insulin Lispro Mix in Type 2 Diabetic Asian Patients	NA	NA	NA	NA	NA	NA	NA	NA	NA	NA	NA	NA	NA	NA	NA	NA	NA	NA	NA	NA	NA	NA	NA	NA	NA	NA	A Study of Insulin Lispro Mix in Type 2 Diabetic Asian Patients	NA	NA	NA
NA	NA	NA	NA	NA	NA	NA	NA	NA	NA	NA	NA	NA	NA	NA	ClinicalTrials		NA	NA	A Trial of an Integrated E-diagnosis Assessment to Improve the Management of Childhood Illnesses in Burkina Faso	NA	NA	NA	NA	NA	NA	NA	NA	NA	NA	NA	NA	NA	NA	NA	NA	NA	NA	NA	NA	NA	NA	NA	NA	NA	NA	A Trial of an Integrated E-diagnosis Assessment to Improve the Management of Childhood Illnesses in Burkina Faso	NA	NA	NA
NA		Abstracts	NA	NA	NA	NA	NA	NA	NA	NA	NA	NA	NA	NA	NCBI				Abstracts	NA	NA	NA	NA	NA	NA	NA	NA	NA	NA	NA	NA	NA	NA	NA	NA	NA	NA	NA	NA	HPB (Oxford) 2007; 9(Suppl 1): 36???110. doi:??10.1080/16515320701258846	PMC2023963		NA	NA	NA	NA	NA	NA	NA
NA		Abstracts of papers presented at the ISLAR (International Symposium on Laboratory Automation and Robotics) 1998	NA	NA	NA	NA	NA	NA	NA	NA	NA	NA	NA	NA	NCBI				Abstracts of papers presented at the ISLAR (International Symposium on Laboratory Automation and Robotics) 1998	NA	NA	NA	NA	NA	NA	NA	NA	NA	NA	NA	NA	NA	NA	NA	NA	NA	NA	NA	NA	J Autom Methods Manag Chem. 1999; 21(3): 65???105. doi:??10.1155/S1463924699000115	PMC2548241		NA	NA	NA	NA	NA	NA	NA
NA		ACTRIMS-ECTRIMS MSBoston 2014: Poster Sessions 2	NA	NA	NA	NA	NA	NA	NA	NA	NA	NA	NA	NA	NCBI				ACTRIMS-ECTRIMS MSBoston 2014: Poster Sessions 2	NA	NA	NA	NA	NA	NA	NA	NA	NA	NA	NA	NA	NA	NA	NA	NA	NA	NA	NA	NA	Mult Scler. 2014 September; 20(1 Suppl): 285???496. doi:??10.1177/1352458514547846	PMC4244175		NA	NA	NA	NA	NA	NA	NA
NA		Allergy, Immunity and Infection, and Allergy and Clinical Immunology Joint Session	NA	NA	NA	NA	NA	NA	NA	NA	NA	NA	NA	NA	NCBI				Allergy, Immunity and Infection, and Allergy and Clinical Immunology Joint Session	NA	NA	NA	NA	NA	NA	NA	NA	NA	NA	NA	NA	NA	NA	NA	NA	NA	NA	NA	NA	Arch Dis Child. 2006 April; 91(Suppl1): A64???A70.	PMC2066055		NA	NA	NA	NA	NA	NA	NA
NA	NA	NA	NA	NA	NA	NA	NA	NA	NA	NA	NA	NA	NA	NA	ClinicalTrials		NA	NA	An Intergenerational Community Based Participatory Research (CBPR) Intervention to Reduce Appalachian Health Disparities	NA	NA	NA	NA	NA	NA	NA	NA	NA	NA	NA	NA	NA	NA	NA	NA	NA	NA	NA	NA	NA	NA	NA	NA	NA	NA	An Intergenerational Community Based Participatory Research (CBPR) Intervention to Reduce Appalachian Health Disparities	NA	NA	NA
NA	NA	NA	NA	NA	NA	NA	NA	NA	NA	NA	NA	NA	NA	NA	ClinicalTrials		NA	NA	Angioplasty to Blunt the Rise of Troponin in Acute Coronary Syndrome (ACS)	NA	NA	NA	NA	NA	NA	NA	NA	NA	NA	NA	NA	NA	NA	NA	NA	NA	NA	NA	NA	NA	NA	NA	NA	NA	NA	Angioplasty to Blunt the Rise of Troponin in Acute Coronary Syndrome (ACS)	NA	NA	NA
NA		Annex 2: Studying the weaning process	NA	NA	NA	NA	NA	NA	NA	NA	NA	NA	NA	NA	NCBI				Annex 2: Studying the weaning process	NA	NA	NA	NA	NA	NA	NA	NA	NA	NA	NA	NA	NA	NA	NA	NA	NA	NA	NA	NA	Bull World Health Organ. 1989; 67(Suppl): 100???106.	PMC2491204		NA	NA	NA	NA	NA	NA	NA
NA	NA	NA	NA	NA	NA	NA	NA	NA	NA	NA	NA	NA	NA	NA	ClinicalTrials		NA	NA	Arthritis Health Journal Proof of Concept Study	NA	NA	NA	NA	NA	NA	NA	NA	NA	NA	NA	NA	NA	NA	NA	NA	NA	NA	NA	NA	NA	NA	NA	NA	NA	NA	Arthritis Health Journal Proof of Concept Study	NA	NA	NA
NA		Asian Society of Vascular Surgery in 2012???Abstracts from Asia	NA	NA	NA	NA	NA	NA	NA	NA	NA	NA	NA	NA	NCBI				Asian Society of Vascular Surgery in 2012???Abstracts from Asia	NA	NA	NA	NA	NA	NA	NA	NA	NA	NA	NA	NA	NA	NA	NA	NA	NA	NA	NA	NA	Ann Vasc Dis. 2012; 5(4): 475???510. Published online 2012 December 25. doi:??10.3400/avd.asvs2012abstracts	PMC3641551		NA	NA	NA	NA	NA	NA	NA
NA	NA	NA	NA	NA	NA	NA	NA	NA	NA	NA	NA	NA	NA	NA	ClinicalTrials		NA	NA	Assessment and Treatment of Caffeine Dependence	NA	NA	NA	NA	NA	NA	NA	NA	NA	NA	NA	NA	NA	NA	NA	NA	NA	NA	NA	NA	NA	NA	NA	NA	NA	NA	Assessment and Treatment of Caffeine Dependence	NA	NA	NA
NA	NA	NA	NA	NA	NA	NA	NA	NA	NA	NA	NA	NA	NA	NA	ClinicalTrials		NA	NA	B'More Healthy; Communities for Kids (BHCK)	NA	NA	NA	NA	NA	NA	NA	NA	NA	NA	NA	NA	NA	NA	NA	NA	NA	NA	NA	NA	NA	NA	NA	NA	NA	NA	B'More Healthy; Communities for Kids (BHCK)	NA	NA	NA
NA	NA	NA	NA	NA	NA	NA	NA	NA	NA	NA	NA	NA	NA	NA	ClinicalTrials		NA	NA	BABYDIET-Study - Primary Prevention of Type 1 Diabetes in Relatives at Increased Genetic Risk	NA	NA	NA	NA	NA	NA	NA	NA	NA	NA	NA	NA	NA	NA	NA	NA	NA	NA	NA	NA	NA	NA	NA	NA	NA	NA	BABYDIET-Study - Primary Prevention of Type 1 Diabetes in Relatives at Increased Genetic Risk	NA	NA	NA
NA	NA	NA	NA	NA	NA	NA	NA	NA	NA	NA	NA	NA	NA	NA	ClinicalTrials		NA	NA	Behavioral Intervention Study for Better Breast and Cervical Cancer Control for Korean American Women	NA	NA	NA	NA	NA	NA	NA	NA	NA	NA	NA	NA	NA	NA	NA	NA	NA	NA	NA	NA	NA	NA	NA	NA	NA	NA	Behavioral Intervention Study for Better Breast and Cervical Cancer Control for Korean American Women	NA	NA	NA
NA	NA	NA	NA	NA	NA	NA	NA	NA	NA	NA	NA	NA	NA	NA	ClinicalTrials		NA	NA	Bihar School Teachers Study	NA	NA	NA	NA	NA	NA	NA	NA	NA	NA	NA	NA	NA	NA	NA	NA	NA	NA	NA	NA	NA	NA	NA	NA	NA	NA	Bihar School Teachers Study	NA	NA	NA
NA	NA	NA	NA	NA	NA	NA	NA	NA	NA	NA	NA	NA	NA	NA	ClinicalTrials		NA	NA	Cambodia Integrated HIV and Drug Prevention Implementation Program	NA	NA	NA	NA	NA	NA	NA	NA	NA	NA	NA	NA	NA	NA	NA	NA	NA	NA	NA	NA	NA	NA	NA	NA	NA	NA	Cambodia Integrated HIV and Drug Prevention Implementation Program	NA	NA	NA
NA		Canadian Spine Society abstracts presented at the CSS ninth annual meeting 2009	NA	NA	NA	NA	NA	NA	NA	NA	NA	NA	NA	NA	NCBI				Canadian Spine Society abstracts presented at the CSS ninth annual meeting 2009	NA	NA	NA	NA	NA	NA	NA	NA	NA	NA	NA	NA	NA	NA	NA	NA	NA	NA	NA	NA	Can J Surg. 2009 June; 52(Suppl): 3???23.	PMC2694722		NA	NA	NA	NA	NA	NA	NA
NA	NA	NA	NA	NA	NA	NA	NA	NA	NA	NA	NA	NA	NA	NA	ClinicalTrials		NA	NA	CardioMetabolic Program Meets eHealth: Redesign and Evaluation for Optimal Reach and Impact	NA	NA	NA	NA	NA	NA	NA	NA	NA	NA	NA	NA	NA	NA	NA	NA	NA	NA	NA	NA	NA	NA	NA	NA	NA	NA	CardioMetabolic Program Meets eHealth: Redesign and Evaluation for Optimal Reach and Impact	NA	NA	NA
NA		Changes in Medicare Rules Pertaining to Consignment Closets or Stock/Bill Arrangements	NA	NA	NA	NA	NA	NA	NA	NA	NA	NA	NA	NA	NCBI				Changes in Medicare Rules Pertaining to Consignment Closets or Stock/Bill Arrangements	NA	NA	NA	NA	NA	NA	NA	NA	NA	NA	NA	NA	NA	NA	NA	NA	NA	NA	NA	NA	J Oncol Pract. 2010 January; 6(1): 44. doi:??10.1200/JOP.091069	PMC2805346		NA	NA	NA	NA	NA	NA	NA
NA	NA	NA	NA	NA	NA	NA	NA	NA	NA	NA	NA	NA	NA	NA	ClinicalTrials		NA	NA	Child Care Wellness Study on Nutrition and Physical Activity	NA	NA	NA	NA	NA	NA	NA	NA	NA	NA	NA	NA	NA	NA	NA	NA	NA	NA	NA	NA	NA	NA	NA	NA	NA	NA	Child Care Wellness Study on Nutrition and Physical Activity	NA	NA	NA
NA	NA	NA	NA	NA	NA	NA	NA	NA	NA	NA	NA	NA	NA	NA	ClinicalTrials		NA	NA	Circuit Training and Motivational Interviewing to Reduce Type 2 Diabetes in Youth	NA	NA	NA	NA	NA	NA	NA	NA	NA	NA	NA	NA	NA	NA	NA	NA	NA	NA	NA	NA	NA	NA	NA	NA	NA	NA	Circuit Training and Motivational Interviewing to Reduce Type 2 Diabetes in Youth	NA	NA	NA
NA		Clean air: Air Pollution Control Association meeting. Four briefs	NA	NA	NA	NA	NA	NA	NA	NA	NA	NA	NA	NA	NCBI				Clean air: Air Pollution Control Association meeting. Four briefs	NA	NA	NA	NA	NA	NA	NA	NA	NA	NA	NA	NA	NA	NA	NA	NA	NA	NA	NA	NA	Public Health Rep. 1957 January; 72(1): 67???76.	PMC2031115		NA	NA	NA	NA	NA	NA	NA
NA	NA	NA	NA	NA	NA	NA	NA	NA	NA	NA	NA	NA	NA	NA	ClinicalTrials		NA	NA	Clinical Pathways for the Management of Acute Coronary Syndromes - Phase 3,CPACS-3	NA	NA	NA	NA	NA	NA	NA	NA	NA	NA	NA	NA	NA	NA	NA	NA	NA	NA	NA	NA	NA	NA	NA	NA	NA	NA	Clinical Pathways for the Management of Acute Coronary Syndromes - Phase 3,CPACS-3	NA	NA	NA
NA	NA	NA	NA	NA	NA	NA	NA	NA	NA	NA	NA	NA	NA	NA	ClinicalTrials		NA	NA	Clinical Trial of Air Cleaners to Improve Indoor Air Quality and COPD Health	NA	NA	NA	NA	NA	NA	NA	NA	NA	NA	NA	NA	NA	NA	NA	NA	NA	NA	NA	NA	NA	NA	NA	NA	NA	NA	Clinical Trial of Air Cleaners to Improve Indoor Air Quality and COPD Health	NA	NA	NA
NA		CLINICAL VIGNETTES	NA	NA	NA	NA	NA	NA	NA	NA	NA	NA	NA	NA	NCBI				CLINICAL VIGNETTES	NA	NA	NA	NA	NA	NA	NA	NA	NA	NA	NA	NA	NA	NA	NA	NA	NA	NA	NA	NA	J Gen Intern Med. 2004 April; 19(Suppl 1): 23???83. doi:??10.1111/j.1525-1497.2004.S1006_1.x	PMC1492602		NA	NA	NA	NA	NA	NA	NA
NA	NA	NA	NA	NA	NA	NA	NA	NA	NA	NA	NA	NA	NA	NA	ClinicalTrials		NA	NA	CNI-free \Bottom\"-up Immunosuppression in Patients Undergoing Liver Transplantation"	NA	NA	NA	NA	NA	NA	NA	NA	NA	NA	NA	NA	NA	NA	NA	NA	NA	NA	NA	NA	NA	NA	NA	NA	NA	NA	CNI-free \Bottom\"-up Immunosuppression in Patients Undergoing Liver Transplantation"	NA	NA	NA
NA	NA	NA	NA	NA	NA	NA	NA	NA	NA	NA	NA	NA	NA	NA	ClinicalTrials		NA	NA	Cognitive Behavioral Therapy to Treat Bulimia Nervosa in Adolescents	NA	NA	NA	NA	NA	NA	NA	NA	NA	NA	NA	NA	NA	NA	NA	NA	NA	NA	NA	NA	NA	NA	NA	NA	NA	NA	Cognitive Behavioral Therapy to Treat Bulimia Nervosa in Adolescents	NA	NA	NA
NA	NA	NA	NA	NA	NA	NA	NA	NA	NA	NA	NA	NA	NA	NA	ClinicalTrials		NA	NA	Community-Based Diabetes Care for Korean American Immigrants	NA	NA	NA	NA	NA	NA	NA	NA	NA	NA	NA	NA	NA	NA	NA	NA	NA	NA	NA	NA	NA	NA	NA	NA	NA	NA	Community-Based Diabetes Care for Korean American Immigrants	NA	NA	NA
NA	NA	NA	NA	NA	NA	NA	NA	NA	NA	NA	NA	NA	NA	NA	ClinicalTrials		NA	NA	Community-Partnered Dominican Republic Tobacco Control	NA	NA	NA	NA	NA	NA	NA	NA	NA	NA	NA	NA	NA	NA	NA	NA	NA	NA	NA	NA	NA	NA	NA	NA	NA	NA	Community-Partnered Dominican Republic Tobacco Control	NA	NA	NA
NA	NA	NA	NA	NA	NA	NA	NA	NA	NA	NA	NA	NA	NA	NA	ClinicalTrials		NA	NA	Community Choirs To Promote Healthy Aging; Community of Voices Chorus	NA	NA	NA	NA	NA	NA	NA	NA	NA	NA	NA	NA	NA	NA	NA	NA	NA	NA	NA	NA	NA	NA	NA	NA	NA	NA	Community Choirs To Promote Healthy Aging; Community of Voices Chorus	NA	NA	NA
NA	NA	NA	NA	NA	NA	NA	NA	NA	NA	NA	NA	NA	NA	NA	ClinicalTrials		NA	NA	Community Outreach - Obesity Prevention Trial (CO-OPT)	NA	NA	NA	NA	NA	NA	NA	NA	NA	NA	NA	NA	NA	NA	NA	NA	NA	NA	NA	NA	NA	NA	NA	NA	NA	NA	Community Outreach - Obesity Prevention Trial (CO-OPT)	NA	NA	NA
NA	NA	NA	NA	NA	NA	NA	NA	NA	NA	NA	NA	NA	NA	NA	ClinicalTrials		NA	NA	Community Self-help Using Thought Field Therapy in a Traumatised Population in Uganda: a Randomised Trial	NA	NA	NA	NA	NA	NA	NA	NA	NA	NA	NA	NA	NA	NA	NA	NA	NA	NA	NA	NA	NA	NA	NA	NA	NA	NA	Community Self-help Using Thought Field Therapy in a Traumatised Population in Uganda: a Randomised Trial	NA	NA	NA
NA	NA	NA	NA	NA	NA	NA	NA	NA	NA	NA	NA	NA	NA	NA	ClinicalTrials		NA	NA	Computerised Interventions for Thinking and Anxiety in Delusions (CITADEL) Trial	NA	NA	NA	NA	NA	NA	NA	NA	NA	NA	NA	NA	NA	NA	NA	NA	NA	NA	NA	NA	NA	NA	NA	NA	NA	NA	Computerised Interventions for Thinking and Anxiety in Delusions (CITADEL) Trial	NA	NA	NA
NA	NA	NA	NA	NA	NA	NA	NA	NA	NA	NA	NA	NA	NA	NA	ClinicalTrials		NA	NA	Controlled Trial to Test the Efficacy of Lipid-based Nutrient Supplements to Prevent Severe Stunting Among Infants	NA	NA	NA	NA	NA	NA	NA	NA	NA	NA	NA	NA	NA	NA	NA	NA	NA	NA	NA	NA	NA	NA	NA	NA	NA	NA	Controlled Trial to Test the Efficacy of Lipid-based Nutrient Supplements to Prevent Severe Stunting Among Infants	NA	NA	NA
NA	NA	NA	NA	NA	NA	NA	NA	NA	NA	NA	NA	NA	NA	NA	ClinicalTrials		NA	NA	Cookstove Replacement for Prevention of ALRI and Low Birthweight in Nepal	NA	NA	NA	NA	NA	NA	NA	NA	NA	NA	NA	NA	NA	NA	NA	NA	NA	NA	NA	NA	NA	NA	NA	NA	NA	NA	Cookstove Replacement for Prevention of ALRI and Low Birthweight in Nepal	NA	NA	NA
NA	NA	NA	NA	NA	NA	NA	NA	NA	NA	NA	NA	NA	NA	NA	ClinicalTrials		NA	NA	Daily Subjective and Objective Smartphone Measures of Illness Activity to Treat Bipolar Disorder- The MONARCA II Trial	NA	NA	NA	NA	NA	NA	NA	NA	NA	NA	NA	NA	NA	NA	NA	NA	NA	NA	NA	NA	NA	NA	NA	NA	NA	NA	Daily Subjective and Objective Smartphone Measures of Illness Activity to Treat Bipolar Disorder- The MONARCA II Trial	NA	NA	NA
NA	NA	NA	NA	NA	NA	NA	NA	NA	NA	NA	NA	NA	NA	NA	ClinicalTrials		NA	NA	Data-driven Quality Improvement in Primary Care - Trial	NA	NA	NA	NA	NA	NA	NA	NA	NA	NA	NA	NA	NA	NA	NA	NA	NA	NA	NA	NA	NA	NA	NA	NA	NA	NA	Data-driven Quality Improvement in Primary Care - Trial	NA	NA	NA
NA	NA	NA	NA	NA	NA	NA	NA	NA	NA	NA	NA	NA	NA	NA	ClinicalTrials		NA	NA	Developing and Testing an Implementation Strategy to Improve Perioperative Diabetes Care	NA	NA	NA	NA	NA	NA	NA	NA	NA	NA	NA	NA	NA	NA	NA	NA	NA	NA	NA	NA	NA	NA	NA	NA	NA	NA	Developing and Testing an Implementation Strategy to Improve Perioperative Diabetes Care	NA	NA	NA
NA	NA	NA	NA	NA	NA	NA	NA	NA	NA	NA	NA	NA	NA	NA	ClinicalTrials		NA	NA	Diabetes CKD Lifestyle Technology Study	NA	NA	NA	NA	NA	NA	NA	NA	NA	NA	NA	NA	NA	NA	NA	NA	NA	NA	NA	NA	NA	NA	NA	NA	NA	NA	Diabetes CKD Lifestyle Technology Study	NA	NA	NA
NA	NA	NA	NA	NA	NA	NA	NA	NA	NA	NA	NA	NA	NA	NA	ClinicalTrials		NA	NA	Diabetes Prevention Program for Obese Latino Youth	NA	NA	NA	NA	NA	NA	NA	NA	NA	NA	NA	NA	NA	NA	NA	NA	NA	NA	NA	NA	NA	NA	NA	NA	NA	NA	Diabetes Prevention Program for Obese Latino Youth	NA	NA	NA
NA		Discussion	NA	NA	NA	NA	NA	NA	NA	NA	NA	NA	NA	NA	NCBI		Ravitch M		Discussion	NA	NA	NA	NA	NA	NA	NA	NA	NA	NA	NA	NA	NA	NA	NA	NA	NA	NA	NA	NA	Ann Surg. 1989 May; 209(5): 582???583.	PMC1494077		NA	NA	NA	NA	NA	NA	NA
NA		Discussion	NA	NA	NA	NA	NA	NA	NA	NA	NA	NA	NA	NA	NCBI		Parsons W		Discussion	NA	NA	NA	NA	NA	NA	NA	NA	NA	NA	NA	NA	NA	NA	NA	NA	NA	NA	NA	NA	Ann Surg. 1948 May; 127(5): 825???829.	PMC1513858		NA	NA	NA	NA	NA	NA	NA
NA	NA	NA	NA	NA	NA	NA	NA	NA	NA	NA	NA	NA	NA	NA	ClinicalTrials		NA	NA	Does Menstrual Hygiene Matter? Investigating the Impact of a Menstrual Hygiene Program on Ugandan Girls' School Absenteeism	NA	NA	NA	NA	NA	NA	NA	NA	NA	NA	NA	NA	NA	NA	NA	NA	NA	NA	NA	NA	NA	NA	NA	NA	NA	NA	Does Menstrual Hygiene Matter? Investigating the Impact of a Menstrual Hygiene Program on Ugandan Girls' School Absenteeism	NA	NA	NA
NA	NA	NA	NA	NA	NA	NA	NA	NA	NA	NA	NA	NA	NA	NA	ClinicalTrials		NA	NA	Early Rheumatoid Arthritis COR Intervention	NA	NA	NA	NA	NA	NA	NA	NA	NA	NA	NA	NA	NA	NA	NA	NA	NA	NA	NA	NA	NA	NA	NA	NA	NA	NA	Early Rheumatoid Arthritis COR Intervention	NA	NA	NA
NA	NA	NA	NA	NA	NA	NA	NA	NA	NA	NA	NA	NA	NA	NA	ClinicalTrials		NA	NA	Early Versus Delayed Switch in Medication in Patients With Major Depressive Disorder	NA	NA	NA	NA	NA	NA	NA	NA	NA	NA	NA	NA	NA	NA	NA	NA	NA	NA	NA	NA	NA	NA	NA	NA	NA	NA	Early Versus Delayed Switch in Medication in Patients With Major Depressive Disorder	NA	NA	NA
NA	NA	NA	NA	NA	NA	NA	NA	NA	NA	NA	NA	NA	NA	NA	ClinicalTrials		NA	NA	Early Versus Delayed Timing of Intervention in Patients With Acute Coronary Syndromes	NA	NA	NA	NA	NA	NA	NA	NA	NA	NA	NA	NA	NA	NA	NA	NA	NA	NA	NA	NA	NA	NA	NA	NA	NA	NA	Early Versus Delayed Timing of Intervention in Patients With Acute Coronary Syndromes	NA	NA	NA
NA	NA	NA	NA	NA	NA	NA	NA	NA	NA	NA	NA	NA	NA	NA	ClinicalTrials		NA	NA	Educational Intervention to Reduce Drug-related Hospitalizations in Elderly Primary Health Care Patients	NA	NA	NA	NA	NA	NA	NA	NA	NA	NA	NA	NA	NA	NA	NA	NA	NA	NA	NA	NA	NA	NA	NA	NA	NA	NA	Educational Intervention to Reduce Drug-related Hospitalizations in Elderly Primary Health Care Patients	NA	NA	NA
NA	NA	NA	NA	NA	NA	NA	NA	NA	NA	NA	NA	NA	NA	NA	ClinicalTrials		NA	NA	Effectiveness of a Hospital Addiction Service in Treating Opioid and Alcohol Addiction	NA	NA	NA	NA	NA	NA	NA	NA	NA	NA	NA	NA	NA	NA	NA	NA	NA	NA	NA	NA	NA	NA	NA	NA	NA	NA	Effectiveness of a Hospital Addiction Service in Treating Opioid and Alcohol Addiction	NA	NA	NA
NA	NA	NA	NA	NA	NA	NA	NA	NA	NA	NA	NA	NA	NA	NA	ClinicalTrials		NA	NA	Effectiveness of Active Case Finding of Household Contacts in a Routine Tuberculosis (TB) Control Program	NA	NA	NA	NA	NA	NA	NA	NA	NA	NA	NA	NA	NA	NA	NA	NA	NA	NA	NA	NA	NA	NA	NA	NA	NA	NA	Effectiveness of Active Case Finding of Household Contacts in a Routine Tuberculosis (TB) Control Program	NA	NA	NA
NA	NA	NA	NA	NA	NA	NA	NA	NA	NA	NA	NA	NA	NA	NA	ClinicalTrials		NA	NA	Effectiveness Study of Community-Based, Peer-Led Education on Weight Loss and Diabetes	NA	NA	NA	NA	NA	NA	NA	NA	NA	NA	NA	NA	NA	NA	NA	NA	NA	NA	NA	NA	NA	NA	NA	NA	NA	NA	Effectiveness Study of Community-Based, Peer-Led Education on Weight Loss and Diabetes	NA	NA	NA
NA	NA	NA	NA	NA	NA	NA	NA	NA	NA	NA	NA	NA	NA	NA	ClinicalTrials		NA	NA	Effects of a Music-Based Multitask Exercises Program on Gait, Balance and Fall Risk in the Elderly	NA	NA	NA	NA	NA	NA	NA	NA	NA	NA	NA	NA	NA	NA	NA	NA	NA	NA	NA	NA	NA	NA	NA	NA	NA	NA	Effects of a Music-Based Multitask Exercises Program on Gait, Balance and Fall Risk in the Elderly	NA	NA	NA
NA	NA	NA	NA	NA	NA	NA	NA	NA	NA	NA	NA	NA	NA	NA	ClinicalTrials		NA	NA	Engaging Informal Health Care Providers on Case Detection and Treatment Initiation Rates for TB and HIV in Rural Malawi (Triage Plus)	NA	NA	NA	NA	NA	NA	NA	NA	NA	NA	NA	NA	NA	NA	NA	NA	NA	NA	NA	NA	NA	NA	NA	NA	NA	NA	Engaging Informal Health Care Providers on Case Detection and Treatment Initiation Rates for TB and HIV in Rural Malawi (Triage Plus)	NA	NA	NA
NA	NA	NA	NA	NA	NA	NA	NA	NA	NA	NA	NA	NA	NA	NA	ClinicalTrials		NA	NA	Enhanced Access to HIV Care for Drug Users in San Juan, Puerto Rico	NA	NA	NA	NA	NA	NA	NA	NA	NA	NA	NA	NA	NA	NA	NA	NA	NA	NA	NA	NA	NA	NA	NA	NA	NA	NA	Enhanced Access to HIV Care for Drug Users in San Juan, Puerto Rico	NA	NA	NA
NA	NA	NA	NA	NA	NA	NA	NA	NA	NA	NA	NA	NA	NA	NA	ClinicalTrials		NA	NA	Enhancing Parenting for Depressed Caregivers	NA	NA	NA	NA	NA	NA	NA	NA	NA	NA	NA	NA	NA	NA	NA	NA	NA	NA	NA	NA	NA	NA	NA	NA	NA	NA	Enhancing Parenting for Depressed Caregivers	NA	NA	NA
NA	NA	NA	NA	NA	NA	NA	NA	NA	NA	NA	NA	NA	NA	NA	ClinicalTrials		NA	NA	Enhancing Teachable Moment Communication for Smoking Cessation and Weight Management	NA	NA	NA	NA	NA	NA	NA	NA	NA	NA	NA	NA	NA	NA	NA	NA	NA	NA	NA	NA	NA	NA	NA	NA	NA	NA	Enhancing Teachable Moment Communication for Smoking Cessation and Weight Management	NA	NA	NA
NA	NA	NA	NA	NA	NA	NA	NA	NA	NA	NA	NA	NA	NA	NA	ClinicalTrials		NA	NA	Evaluating a Web-Based Ventilator Management Educational Program for Clinicians (The Lung Injury Knowledge Network [LINK] Study)	NA	NA	NA	NA	NA	NA	NA	NA	NA	NA	NA	NA	NA	NA	NA	NA	NA	NA	NA	NA	NA	NA	NA	NA	NA	NA	Evaluating a Web-Based Ventilator Management Educational Program for Clinicians (The Lung Injury Knowledge Network [LINK] Study)	NA	NA	NA
NA	NA	NA	NA	NA	NA	NA	NA	NA	NA	NA	NA	NA	NA	NA	ClinicalTrials		NA	NA	Evaluating an Internet-based Intervention for Insomnia in Breast Cancer Survivors	NA	NA	NA	NA	NA	NA	NA	NA	NA	NA	NA	NA	NA	NA	NA	NA	NA	NA	NA	NA	NA	NA	NA	NA	NA	NA	Evaluating an Internet-based Intervention for Insomnia in Breast Cancer Survivors	NA	NA	NA
NA	NA	NA	NA	NA	NA	NA	NA	NA	NA	NA	NA	NA	NA	NA	ClinicalTrials		NA	NA	Evaluating the CG ASSIST Program for Caregiving Dyads	NA	NA	NA	NA	NA	NA	NA	NA	NA	NA	NA	NA	NA	NA	NA	NA	NA	NA	NA	NA	NA	NA	NA	NA	NA	NA	Evaluating the CG ASSIST Program for Caregiving Dyads	NA	NA	NA
NA	NA	NA	NA	NA	NA	NA	NA	NA	NA	NA	NA	NA	NA	NA	ClinicalTrials		NA	NA	Evaluating the RelAte Mealtime Program as an Intervention to Treat Social Isolation and Improve Cooking Behaviour Among Older Adults Living Alone	NA	NA	NA	NA	NA	NA	NA	NA	NA	NA	NA	NA	NA	NA	NA	NA	NA	NA	NA	NA	NA	NA	NA	NA	NA	NA	Evaluating the RelAte Mealtime Program as an Intervention to Treat Social Isolation and Improve Cooking Behaviour Among Older Adults Living Alone	NA	NA	NA
NA	NA	NA	NA	NA	NA	NA	NA	NA	NA	NA	NA	NA	NA	NA	ClinicalTrials		NA	NA	Evaluation of Safe-Water Programs in Baja California Sur, Mexico	NA	NA	NA	NA	NA	NA	NA	NA	NA	NA	NA	NA	NA	NA	NA	NA	NA	NA	NA	NA	NA	NA	NA	NA	NA	NA	Evaluation of Safe-Water Programs in Baja California Sur, Mexico	NA	NA	NA
NA	NA	NA	NA	NA	NA	NA	NA	NA	NA	NA	NA	NA	NA	NA	ClinicalTrials		NA	NA	Evaluation of the Public Health Impact of Seasonal Intermittent Preventive Treatment (IPT) in Children in Senegal	NA	NA	NA	NA	NA	NA	NA	NA	NA	NA	NA	NA	NA	NA	NA	NA	NA	NA	NA	NA	NA	NA	NA	NA	NA	NA	Evaluation of the Public Health Impact of Seasonal Intermittent Preventive Treatment (IPT) in Children in Senegal	NA	NA	NA
NA	NA	NA	NA	NA	NA	NA	NA	NA	NA	NA	NA	NA	NA	NA	ClinicalTrials		NA	NA	Everolimus in de Novo Heart Transplant Recipients	NA	NA	NA	NA	NA	NA	NA	NA	NA	NA	NA	NA	NA	NA	NA	NA	NA	NA	NA	NA	NA	NA	NA	NA	NA	NA	Everolimus in de Novo Heart Transplant Recipients	NA	NA	NA
NA	NA	NA	NA	NA	NA	NA	NA	NA	NA	NA	NA	NA	NA	NA	ClinicalTrials		NA	NA	Everolimus in de Novo Kidney Transplant Recipients	NA	NA	NA	NA	NA	NA	NA	NA	NA	NA	NA	NA	NA	NA	NA	NA	NA	NA	NA	NA	NA	NA	NA	NA	NA	NA	Everolimus in de Novo Kidney Transplant Recipients	NA	NA	NA
NA	NA	NA	NA	NA	NA	NA	NA	NA	NA	NA	NA	NA	NA	NA	ClinicalTrials		NA	NA	Experimental Control Investigation of the Impact of Assistive Technology on the User-caregiver Dyad: a Multi-site Trial	NA	NA	NA	NA	NA	NA	NA	NA	NA	NA	NA	NA	NA	NA	NA	NA	NA	NA	NA	NA	NA	NA	NA	NA	NA	NA	Experimental Control Investigation of the Impact of Assistive Technology on the User-caregiver Dyad: a Multi-site Trial	NA	NA	NA
NA	NA	NA	NA	NA	NA	NA	NA	NA	NA	NA	NA	NA	NA	NA	ClinicalTrials		NA	NA	Faith Moves Mountains: A Community Based Participatory Research (CBPR) Appalachian Wellness & Cancer Prevention Program	NA	NA	NA	NA	NA	NA	NA	NA	NA	NA	NA	NA	NA	NA	NA	NA	NA	NA	NA	NA	NA	NA	NA	NA	NA	NA	Faith Moves Mountains: A Community Based Participatory Research (CBPR) Appalachian Wellness & Cancer Prevention Program	NA	NA	NA
NA	NA	NA	NA	NA	NA	NA	NA	NA	NA	NA	NA	NA	NA	NA	ClinicalTrials		NA	NA	Faith Moves Mountains: An Appalachian Cervical Cancer Prevention Project	NA	NA	NA	NA	NA	NA	NA	NA	NA	NA	NA	NA	NA	NA	NA	NA	NA	NA	NA	NA	NA	NA	NA	NA	NA	NA	Faith Moves Mountains: An Appalachian Cervical Cancer Prevention Project	NA	NA	NA
NA	NA	NA	NA	NA	NA	NA	NA	NA	NA	NA	NA	NA	NA	NA	ClinicalTrials		NA	NA	Families Taking Control (FTC): Family-based Problem-solving Intervention for Children With Sickle Cell Disease	NA	NA	NA	NA	NA	NA	NA	NA	NA	NA	NA	NA	NA	NA	NA	NA	NA	NA	NA	NA	NA	NA	NA	NA	NA	NA	Families Taking Control (FTC): Family-based Problem-solving Intervention for Children With Sickle Cell Disease	NA	NA	NA
NA	NA	NA	NA	NA	NA	NA	NA	NA	NA	NA	NA	NA	NA	NA	ClinicalTrials		NA	NA	Family PALS (PArtners in Lifestyle Support)	NA	NA	NA	NA	NA	NA	NA	NA	NA	NA	NA	NA	NA	NA	NA	NA	NA	NA	NA	NA	NA	NA	NA	NA	NA	NA	Family PALS (PArtners in Lifestyle Support)	NA	NA	NA
NA	NA	NA	NA	NA	NA	NA	NA	NA	NA	NA	NA	NA	NA	NA	ClinicalTrials		NA	NA	Feasibility and Preliminary Efficacy of an Activity Tracker-driven Intervention for Promoting Physical Activity in People Living With Osteoarthritis of the Knee	NA	NA	NA	NA	NA	NA	NA	NA	NA	NA	NA	NA	NA	NA	NA	NA	NA	NA	NA	NA	NA	NA	NA	NA	NA	NA	Feasibility and Preliminary Efficacy of an Activity Tracker-driven Intervention for Promoting Physical Activity in People Living With Osteoarthritis of the Knee	NA	NA	NA
NA		From the ARM	NA	NA	NA	NA	NA	NA	NA	NA	NA	NA	NA	NA	NCBI				From the ARM	NA	NA	NA	NA	NA	NA	NA	NA	NA	NA	NA	NA	NA	NA	NA	NA	NA	NA	NA	NA	Br Med J. 1978 July 22; 2(6132): 296???302.	PMC1606361		NA	NA	NA	NA	NA	NA	NA
NA	NA	NA	NA	NA	NA	NA	NA	NA	NA	NA	NA	NA	NA	NA	ClinicalTrials		NA	NA	Goal Setting for Health Behavior and Psychosocial Issues in Primary Care	NA	NA	NA	NA	NA	NA	NA	NA	NA	NA	NA	NA	NA	NA	NA	NA	NA	NA	NA	NA	NA	NA	NA	NA	NA	NA	Goal Setting for Health Behavior and Psychosocial Issues in Primary Care	NA	NA	NA
NA		Guidelines for research on acute respiratory infections: Memorandum from a WHO meeting	NA	NA	NA	NA	NA	NA	NA	NA	NA	NA	NA	NA	NCBI				Guidelines for research on acute respiratory infections: Memorandum from a WHO meeting	NA	NA	NA	NA	NA	NA	NA	NA	NA	NA	NA	NA	NA	NA	NA	NA	NA	NA	NA	NA	Bull World Health Organ. 1982; 60(4): 521???533.	PMC2536077		NA	NA	NA	NA	NA	NA	NA
NA	NA	NA	NA	NA	NA	NA	NA	NA	NA	NA	NA	NA	NA	NA	ClinicalTrials		NA	NA	Hand Hygiene Intervention Study	NA	NA	NA	NA	NA	NA	NA	NA	NA	NA	NA	NA	NA	NA	NA	NA	NA	NA	NA	NA	NA	NA	NA	NA	NA	NA	Hand Hygiene Intervention Study	NA	NA	NA
NA	NA	NA	NA	NA	NA	NA	NA	NA	NA	NA	NA	NA	NA	NA	ClinicalTrials		NA	NA	High-Sensitivity Troponin in the Evaluation of Patients With Acute Coronary Syndrome	NA	NA	NA	NA	NA	NA	NA	NA	NA	NA	NA	NA	NA	NA	NA	NA	NA	NA	NA	NA	NA	NA	NA	NA	NA	NA	High-Sensitivity Troponin in the Evaluation of Patients With Acute Coronary Syndrome	NA	NA	NA
NA	NA	NA	NA	NA	NA	NA	NA	NA	NA	NA	NA	NA	NA	NA	ClinicalTrials		NA	NA	Hip Osteoarthritis: Effects of Exercise Programs on Pain and Disability	NA	NA	NA	NA	NA	NA	NA	NA	NA	NA	NA	NA	NA	NA	NA	NA	NA	NA	NA	NA	NA	NA	NA	NA	NA	NA	Hip Osteoarthritis: Effects of Exercise Programs on Pain and Disability	NA	NA	NA
NA	NA	NA	NA	NA	NA	NA	NA	NA	NA	NA	NA	NA	NA	NA	AdditionalRecords		NA	NA	Home and Community Management of Fevers/Malaria and Pneumonia in Children Under-five: a Cluster Randomised Controlled Trial of an Integrated Approach in a Rural District of Burkina Faso	NA	NA	NA	NA	NA	NA	NA	NA	NA	NA	NA	NA	NA	NA	NA	NA	NA	NA	NA	NA	NA	NA	NA	NA	NA		Home and Community Management of Fevers/Malaria and Pneumonia in Children Under-five: a Cluster Randomised Controlled Trial of an Integrated Approach in a Rural District of Burkina Faso		NA	NA
NA	NA	NA	NA	NA	NA	NA	NA	NA	NA	NA	NA	NA	NA	NA	ClinicalTrials		NA	NA	Hospital Wide Roll-Out of Antimicrobial Stewardship	NA	NA	NA	NA	NA	NA	NA	NA	NA	NA	NA	NA	NA	NA	NA	NA	NA	NA	NA	NA	NA	NA	NA	NA	NA	NA	Hospital Wide Roll-Out of Antimicrobial Stewardship	NA	NA	NA
NA	NA	NA	NA	NA	NA	NA	NA	NA	NA	NA	NA	NA	NA	NA	AdditionalRecords		NA	NA	https://clinicaltrials.gov/ct2/show/NCT01557998	NA	NA	NA	NA	NA	NA	NA	NA	NA	NA	NA	NA	NA	NA	NA	NA	NA	NA	NA	NA	NA	NA	NA	NA	NA		https://clinicaltrials.gov/ct2/show/NCT01557998		NA	NA
NA	NA	NA	NA	NA	NA	NA	NA	NA	NA	NA	NA	NA	NA	NA	AdditionalRecords		NA	NA	https://www.clinicaltrials.gov/ct2/show/NCT01777022	NA	NA	NA	NA	NA	NA	NA	NA	NA	NA	NA	NA	NA	NA	NA	NA	NA	NA	NA	NA	NA	NA	NA	NA	NA		https://www.clinicaltrials.gov/ct2/show/NCT01777022		NA	NA
NA	NA	NA	NA	NA	NA	NA	NA	NA	NA	NA	NA	NA	NA	NA	ClinicalTrials		NA	NA	I-Gel in Out-of-hospital Cardiac Arrest in Norway	NA	NA	NA	NA	NA	NA	NA	NA	NA	NA	NA	NA	NA	NA	NA	NA	NA	NA	NA	NA	NA	NA	NA	NA	NA	NA	I-Gel in Out-of-hospital Cardiac Arrest in Norway	NA	NA	NA
NA	NA	NA	NA	NA	NA	NA	NA	NA	NA	NA	NA	NA	NA	NA	ClinicalTrials		NA	NA	IDEA Study Cognitive Stimulation Therapy (CST) Trial in Tanzania	NA	NA	NA	NA	NA	NA	NA	NA	NA	NA	NA	NA	NA	NA	NA	NA	NA	NA	NA	NA	NA	NA	NA	NA	NA	NA	IDEA Study Cognitive Stimulation Therapy (CST) Trial in Tanzania	NA	NA	NA
NA	NA	NA	NA	NA	NA	NA	NA	NA	NA	NA	NA	NA	NA	NA	ClinicalTrials		NA	NA	Impact of a Multifaceted Program to Prevent Postoperative Delirium in the Elderly	NA	NA	NA	NA	NA	NA	NA	NA	NA	NA	NA	NA	NA	NA	NA	NA	NA	NA	NA	NA	NA	NA	NA	NA	NA	NA	Impact of a Multifaceted Program to Prevent Postoperative Delirium in the Elderly	NA	NA	NA
NA	NA	NA	NA	NA	NA	NA	NA	NA	NA	NA	NA	NA	NA	NA	ClinicalTrials		NA	NA	Impact of Monitoring Quality Indicators in Maternity Departments on Mother and Infant Health	NA	NA	NA	NA	NA	NA	NA	NA	NA	NA	NA	NA	NA	NA	NA	NA	NA	NA	NA	NA	NA	NA	NA	NA	NA	NA	Impact of Monitoring Quality Indicators in Maternity Departments on Mother and Infant Health	NA	NA	NA
NA	NA	NA	NA	NA	NA	NA	NA	NA	NA	NA	NA	NA	NA	NA	ClinicalTrials		NA	NA	Impact of Multidisciplinary Program on Falls in Elderly Inpatients	NA	NA	NA	NA	NA	NA	NA	NA	NA	NA	NA	NA	NA	NA	NA	NA	NA	NA	NA	NA	NA	NA	NA	NA	NA	NA	Impact of Multidisciplinary Program on Falls in Elderly Inpatients	NA	NA	NA
NA	NA	NA	NA	NA	NA	NA	NA	NA	NA	NA	NA	NA	NA	NA	ClinicalTrials		NA	NA	Improvement of Information to Cancer Patients' Caregivers	NA	NA	NA	NA	NA	NA	NA	NA	NA	NA	NA	NA	NA	NA	NA	NA	NA	NA	NA	NA	NA	NA	NA	NA	NA	NA	Improvement of Information to Cancer Patients' Caregivers	NA	NA	NA
NA	NA	NA	NA	NA	NA	NA	NA	NA	NA	NA	NA	NA	NA	NA	ClinicalTrials		NA	NA	Improving Antibiotic Use in Hospitalized Patients With Pneumonia	NA	NA	NA	NA	NA	NA	NA	NA	NA	NA	NA	NA	NA	NA	NA	NA	NA	NA	NA	NA	NA	NA	NA	NA	NA	NA	Improving Antibiotic Use in Hospitalized Patients With Pneumonia	NA	NA	NA
NA	NA	NA	NA	NA	NA	NA	NA	NA	NA	NA	NA	NA	NA	NA	ClinicalTrials		NA	NA	Improving Coronary Prevention in a County Health System	NA	NA	NA	NA	NA	NA	NA	NA	NA	NA	NA	NA	NA	NA	NA	NA	NA	NA	NA	NA	NA	NA	NA	NA	NA	NA	Improving Coronary Prevention in a County Health System	NA	NA	NA
NA	NA	NA	NA	NA	NA	NA	NA	NA	NA	NA	NA	NA	NA	NA	ClinicalTrials		NA	NA	Improving Patient and Family Centered Care in Advanced Critical Illness	NA	NA	NA	NA	NA	NA	NA	NA	NA	NA	NA	NA	NA	NA	NA	NA	NA	NA	NA	NA	NA	NA	NA	NA	NA	NA	Improving Patient and Family Centered Care in Advanced Critical Illness	NA	NA	NA
NA		In situ studies of the primary immune response to (4-hydroxy-3- nitrophenyl)acetyl. IV. Affinity-dependent, antigen-driven B cell apoptosis in germinal centers as a mechanism for maintaining self- tolerance	NA	NA	NA	NA	NA	NA	NA	NA	NA	NA	NA	NA	NCBI		Han S		In situ studies of the primary immune response to (4-hydroxy-3- nitrophenyl)acetyl. IV. Affinity-dependent, antigen-driven B cell apoptosis in germinal centers as a mechanism for maintaining self- tolerance	NA	NA	NA	NA	NA	NA	NA	NA	NA	NA	NA	NA	NA	NA	NA	NA	NA	NA	NA	NA	J Exp Med. 1995 December 1; 182(6): 1635???1644.	PMC2192250		NA	NA	NA	NA	NA	NA	NA
NA		In This Issue	NA	NA	NA	NA	NA	NA	NA	NA	NA	NA	NA	NA	NCBI				In This Issue	NA	NA	NA	NA	NA	NA	NA	NA	NA	NA	NA	NA	NA	NA	NA	NA	NA	NA	NA	NA	Proc Natl Acad Sci U S A. 2006 November 21; 103(47): 17581???17582. doi:??10.1073/iti4706103	PMC1693786		NA	NA	NA	NA	NA	NA	NA
NA		Infant feeding practices revisited. Nutrition Committee of the Canadian Paediatric Society.	NA	NA	NA	NA	NA	NA	NA	NA	NA	NA	NA	NA	NCBI				Infant feeding practices revisited. Nutrition Committee of the Canadian Paediatric Society.	NA	NA	NA	NA	NA	NA	NA	NA	NA	NA	NA	NA	NA	NA	NA	NA	NA	NA	NA	NA	Can Med Assoc J. 1980 May 10; 122(9): 987???989.	PMC1801710		NA	NA	NA	NA	NA	NA	NA
NA	NA	NA	NA	NA	NA	NA	NA	NA	NA	NA	NA	NA	NA	NA	ClinicalTrials		NA	NA	Integrating Palliative and Critical Care (IPACC) Study	NA	NA	NA	NA	NA	NA	NA	NA	NA	NA	NA	NA	NA	NA	NA	NA	NA	NA	NA	NA	NA	NA	NA	NA	NA	NA	Integrating Palliative and Critical Care (IPACC) Study	NA	NA	NA
NA	NA	NA	NA	NA	NA	NA	NA	NA	NA	NA	NA	NA	NA	NA	ClinicalTrials		NA	NA	Integrating Pediatric Care Delivery in Rural Healthcare Systems	NA	NA	NA	NA	NA	NA	NA	NA	NA	NA	NA	NA	NA	NA	NA	NA	NA	NA	NA	NA	NA	NA	NA	NA	NA	NA	Integrating Pediatric Care Delivery in Rural Healthcare Systems	NA	NA	NA
NA	NA	NA	NA	NA	NA	NA	NA	NA	NA	NA	NA	NA	NA	NA	ClinicalTrials		NA	NA	Integration of Chronic Disease Rehabilitation Services Into Primary Care	NA	NA	NA	NA	NA	NA	NA	NA	NA	NA	NA	NA	NA	NA	NA	NA	NA	NA	NA	NA	NA	NA	NA	NA	NA	NA	Integration of Chronic Disease Rehabilitation Services Into Primary Care	NA	NA	NA
NA	NA	NA	NA	NA	NA	NA	NA	NA	NA	NA	NA	NA	NA	NA	ClinicalTrials		NA	NA	Intervention to Increase Parent-provider Communication During Referrals	NA	NA	NA	NA	NA	NA	NA	NA	NA	NA	NA	NA	NA	NA	NA	NA	NA	NA	NA	NA	NA	NA	NA	NA	NA	NA	Intervention to Increase Parent-provider Communication During Referrals	NA	NA	NA
NA	NA	NA	NA	NA	NA	NA	NA	NA	NA	NA	NA	NA	NA	NA	ClinicalTrials		NA	NA	LA Sprouts: The Impact of Gardening and Nutrition Education on Childhood Obesity in Latino Youth	NA	NA	NA	NA	NA	NA	NA	NA	NA	NA	NA	NA	NA	NA	NA	NA	NA	NA	NA	NA	NA	NA	NA	NA	NA	NA	LA Sprouts: The Impact of Gardening and Nutrition Education on Childhood Obesity in Latino Youth	NA	NA	NA
NA	NA	NA	NA	NA	NA	NA	NA	NA	NA	NA	NA	NA	NA	NA	ClinicalTrials		NA	NA	Launching a Salt Substitute to Reduce Blood Pressure at the Population Level in Peru	NA	NA	NA	NA	NA	NA	NA	NA	NA	NA	NA	NA	NA	NA	NA	NA	NA	NA	NA	NA	NA	NA	NA	NA	NA	NA	Launching a Salt Substitute to Reduce Blood Pressure at the Population Level in Peru	NA	NA	NA
NA	NA	NA	NA	NA	NA	NA	NA	NA	NA	NA	NA	NA	NA	NA	ClinicalTrials		NA	NA	Management of Albuminuria in Hypertensive Diabetics	NA	NA	NA	NA	NA	NA	NA	NA	NA	NA	NA	NA	NA	NA	NA	NA	NA	NA	NA	NA	NA	NA	NA	NA	NA	NA	Management of Albuminuria in Hypertensive Diabetics	NA	NA	NA
NA		Management of refractory oedema.	NA	NA	NA	NA	NA	NA	NA	NA	NA	NA	NA	NA	NCBI				Management of refractory oedema.	NA	NA	NA	NA	NA	NA	NA	NA	NA	NA	NA	NA	NA	NA	NA	NA	NA	NA	NA	NA	Br Med J. 1979 January 20; 1(6157): 148???149.	PMC1597592		NA	NA	NA	NA	NA	NA	NA
NA	NA	NA	NA	NA	NA	NA	NA	NA	NA	NA	NA	NA	NA	NA	ClinicalTrials		NA	NA	Marketing Workplace Chronic Disease Prevention	NA	NA	NA	NA	NA	NA	NA	NA	NA	NA	NA	NA	NA	NA	NA	NA	NA	NA	NA	NA	NA	NA	NA	NA	NA	NA	Marketing Workplace Chronic Disease Prevention	NA	NA	NA
NA	NA	NA	NA	NA	NA	NA	NA	NA	NA	NA	NA	NA	NA	NA	ClinicalTrials		NA	NA	Measuring and Monitoring Patient Informed Clinical Outcomes In Psychological Therapy Supervision	NA	NA	NA	NA	NA	NA	NA	NA	NA	NA	NA	NA	NA	NA	NA	NA	NA	NA	NA	NA	NA	NA	NA	NA	NA	NA	Measuring and Monitoring Patient Informed Clinical Outcomes In Psychological Therapy Supervision	NA	NA	NA
NA		Medical care in inner cities.	NA	NA	NA	NA	NA	NA	NA	NA	NA	NA	NA	NA	NCBI		Corfe F		Medical care in inner cities.	NA	NA	NA	NA	NA	NA	NA	NA	NA	NA	NA	NA	NA	NA	NA	NA	NA	NA	NA	NA	Br Med J. 1978 September 9; 2(6139): 766???767.	PMC1607566		NA	NA	NA	NA	NA	NA	NA
NA		Medicopolitical Digest	NA	NA	NA	NA	NA	NA	NA	NA	NA	NA	NA	NA	NCBI				Medicopolitical Digest	NA	NA	NA	NA	NA	NA	NA	NA	NA	NA	NA	NA	NA	NA	NA	NA	NA	NA	NA	NA	BMJ. 1991 March 30; 302(6779): 792???793.	PMC1669563		NA	NA	NA	NA	NA	NA	NA
NA		Medicopolitical Digest	NA	NA	NA	NA	NA	NA	NA	NA	NA	NA	NA	NA	NCBI				Medicopolitical Digest	NA	NA	NA	NA	NA	NA	NA	NA	NA	NA	NA	NA	NA	NA	NA	NA	NA	NA	NA	NA	BMJ. 1991 June 8; 302(6789): 1378-1-22, 1406-2-1407.	PMC1670069		NA	NA	NA	NA	NA	NA	NA
NA	NA	NA	NA	NA	NA	NA	NA	NA	NA	NA	NA	NA	NA	NA	ClinicalTrials		NA	NA	Mental Health Engagement Network (MHEN)	NA	NA	NA	NA	NA	NA	NA	NA	NA	NA	NA	NA	NA	NA	NA	NA	NA	NA	NA	NA	NA	NA	NA	NA	NA	NA	Mental Health Engagement Network (MHEN)	NA	NA	NA
NA	NA	NA	NA	NA	NA	NA	NA	NA	NA	NA	NA	NA	NA	NA	ClinicalTrials		NA	NA	Mindfulness Group-based Intervention for Early Psychosis: A Pilot Study	NA	NA	NA	NA	NA	NA	NA	NA	NA	NA	NA	NA	NA	NA	NA	NA	NA	NA	NA	NA	NA	NA	NA	NA	NA	NA	Mindfulness Group-based Intervention for Early Psychosis: A Pilot Study	NA	NA	NA
NA		Minutes of the Board of Directors Meeting, Alexandria, Virginia, October 8-9, 2008	NA	NA	NA	NA	NA	NA	NA	NA	NA	NA	NA	NA	NCBI				Minutes of the Board of Directors Meeting, Alexandria, Virginia, October 8-9, 2008	NA	NA	NA	NA	NA	NA	NA	NA	NA	NA	NA	NA	NA	NA	NA	NA	NA	NA	NA	NA	Am J Pharm Educ. 2009 December 17; 73(Suppl): S16.	PMC2830030		NA	NA	NA	NA	NA	NA	NA
NA	NA	NA	NA	NA	NA	NA	NA	NA	NA	NA	NA	NA	NA	NA	ClinicalTrials		NA	NA	MONITOR-OA: Using Wearable Activity Trackers to Improve Physical Activity in Knee Osteoarthritis	NA	NA	NA	NA	NA	NA	NA	NA	NA	NA	NA	NA	NA	NA	NA	NA	NA	NA	NA	NA	NA	NA	NA	NA	NA	NA	MONITOR-OA: Using Wearable Activity Trackers to Improve Physical Activity in Knee Osteoarthritis	NA	NA	NA
NA	NA	NA	NA	NA	NA	NA	NA	NA	NA	NA	NA	NA	NA	NA	ClinicalTrials		NA	NA	Multidisciplinary Program \Optimization of Drug Prescription\" : Impact on the Quality of Drug Prescription in Hospitalized Elderly Patients"	NA	NA	NA	NA	NA	NA	NA	NA	NA	NA	NA	NA	NA	NA	NA	NA	NA	NA	NA	NA	NA	NA	NA	NA	NA	NA	Multidisciplinary Program \Optimization of Drug Prescription\" : Impact on the Quality of Drug Prescription in Hospitalized Elderly Patients"	NA	NA	NA
NA	NA	NA	NA	NA	NA	NA	NA	NA	NA	NA	NA	NA	NA	NA	ClinicalTrials		NA	NA	Mumbai Worksite Tobacco Control Study	NA	NA	NA	NA	NA	NA	NA	NA	NA	NA	NA	NA	NA	NA	NA	NA	NA	NA	NA	NA	NA	NA	NA	NA	NA	NA	Mumbai Worksite Tobacco Control Study	NA	NA	NA
NA	NA	NA	NA	NA	NA	NA	NA	NA	NA	NA	NA	NA	NA	NA	ClinicalTrials		NA	NA	Music Therapy for The Rehabilitation of Upper Limb With Stroke Patients	NA	NA	NA	NA	NA	NA	NA	NA	NA	NA	NA	NA	NA	NA	NA	NA	NA	NA	NA	NA	NA	NA	NA	NA	NA	NA	Music Therapy for The Rehabilitation of Upper Limb With Stroke Patients	NA	NA	NA
NA	NA	NA	NA	NA	NA	NA	NA	NA	NA	NA	NA	NA	NA	NA	ClinicalTrials		NA	NA	NAVASET: Nava Level Titration Using Comfort Scales	NA	NA	NA	NA	NA	NA	NA	NA	NA	NA	NA	NA	NA	NA	NA	NA	NA	NA	NA	NA	NA	NA	NA	NA	NA	NA	NAVASET: Nava Level Titration Using Comfort Scales	NA	NA	NA
NA		News	NA	NA	NA	NA	NA	NA	NA	NA	NA	NA	NA	NA	NCBI				News	NA	NA	NA	NA	NA	NA	NA	NA	NA	NA	NA	NA	NA	NA	NA	NA	NA	NA	NA	NA	Can Fam Physician. 1972 September; 18(9): 21, 23, 25-26.	PMC2370588		NA	NA	NA	NA	NA	NA	NA
NA		News	NA	NA	NA	NA	NA	NA	NA	NA	NA	NA	NA	NA	NCBI				News	NA	NA	NA	NA	NA	NA	NA	NA	NA	NA	NA	NA	NA	NA	NA	NA	NA	NA	NA	NA	BMJ. 1990 July 28; 301(6745): 195???200.	PMC1663582		NA	NA	NA	NA	NA	NA	NA
NA		News	NA	NA	NA	NA	NA	NA	NA	NA	NA	NA	NA	NA	NCBI				News	NA	NA	NA	NA	NA	NA	NA	NA	NA	NA	NA	NA	NA	NA	NA	NA	NA	NA	NA	NA	BMJ. 1996 October 26; 313(7064): 1031???1036.	PMC2352383		NA	NA	NA	NA	NA	NA	NA
NA		NEWS AND NOTES	NA	NA	NA	NA	NA	NA	NA	NA	NA	NA	NA	NA	NCBI				NEWS AND NOTES	NA	NA	NA	NA	NA	NA	NA	NA	NA	NA	NA	NA	NA	NA	NA	NA	NA	NA	NA	NA	Br Med J (Clin Res Ed) 1982 April 17; 284(6323): 1199???1201.	PMC1496804		NA	NA	NA	NA	NA	NA	NA
NA	NA	NA	NA	NA	NA	NA	NA	NA	NA	NA	NA	NA	NA	NA	ClinicalTrials		NA	NA	North Carolina WISEWOMAN: Weight-Wise Pilot Study	NA	NA	NA	NA	NA	NA	NA	NA	NA	NA	NA	NA	NA	NA	NA	NA	NA	NA	NA	NA	NA	NA	NA	NA	NA	NA	North Carolina WISEWOMAN: Weight-Wise Pilot Study	NA	NA	NA
NA	NA	NA	NA	NA	NA	NA	NA	NA	NA	NA	NA	NA	NA	NA	ClinicalTrials		NA	NA	Norwegian Constraint-Induced (CI) Therapy Multisite Trial	NA	NA	NA	NA	NA	NA	NA	NA	NA	NA	NA	NA	NA	NA	NA	NA	NA	NA	NA	NA	NA	NA	NA	NA	NA	NA	Norwegian Constraint-Induced (CI) Therapy Multisite Trial	NA	NA	NA
NA	NA	NA	NA	NA	NA	NA	NA	NA	NA	NA	NA	NA	NA	NA	ClinicalTrials		NA	NA	Operational Research for Cryptococcal Antigen Screening	NA	NA	NA	NA	NA	NA	NA	NA	NA	NA	NA	NA	NA	NA	NA	NA	NA	NA	NA	NA	NA	NA	NA	NA	NA	NA	Operational Research for Cryptococcal Antigen Screening	NA	NA	NA
NA	NA	NA	NA	NA	NA	NA	NA	NA	NA	NA	NA	NA	NA	NA	ClinicalTrials		NA	NA	Optimal Amount of Zinc to Include in a Lipid-based Nutrient Supplement (LNS)	NA	NA	NA	NA	NA	NA	NA	NA	NA	NA	NA	NA	NA	NA	NA	NA	NA	NA	NA	NA	NA	NA	NA	NA	NA	NA	Optimal Amount of Zinc to Include in a Lipid-based Nutrient Supplement (LNS)	NA	NA	NA
NA	NA	NA	NA	NA	NA	NA	NA	NA	NA	NA	NA	NA	NA	NA	ClinicalTrials		NA	NA	Overcoming Inactivity in Older Adults: Impact on Vascular Homeostasis	NA	NA	NA	NA	NA	NA	NA	NA	NA	NA	NA	NA	NA	NA	NA	NA	NA	NA	NA	NA	NA	NA	NA	NA	NA	NA	Overcoming Inactivity in Older Adults: Impact on Vascular Homeostasis	NA	NA	NA
NA		Overview of Medicare Parts A-D	NA	NA	NA	NA	NA	NA	NA	NA	NA	NA	NA	NA	NCBI				Overview of Medicare Parts A-D	NA	NA	NA	NA	NA	NA	NA	NA	NA	NA	NA	NA	NA	NA	NA	NA	NA	NA	NA	NA	J Oncol Pract. 2009 March; 5(2): 86???90. doi:??10.1200/JOP.0922502	PMC2790649		NA	NA	NA	NA	NA	NA	NA
NA	NA	NA	NA	NA	NA	NA	NA	NA	NA	NA	NA	NA	NA	NA	ClinicalTrials		NA	NA	Parent-supported Social Skills Training for Teens With Autism Spectrum Disorders (PEERS-K)	NA	NA	NA	NA	NA	NA	NA	NA	NA	NA	NA	NA	NA	NA	NA	NA	NA	NA	NA	NA	NA	NA	NA	NA	NA	NA	Parent-supported Social Skills Training for Teens With Autism Spectrum Disorders (PEERS-K)	NA	NA	NA
NA	NA	NA	NA	NA	NA	NA	NA	NA	NA	NA	NA	NA	NA	NA	ClinicalTrials		NA	NA	Partnership for a Hispanic Diabetes Prevention Program	NA	NA	NA	NA	NA	NA	NA	NA	NA	NA	NA	NA	NA	NA	NA	NA	NA	NA	NA	NA	NA	NA	NA	NA	NA	NA	Partnership for a Hispanic Diabetes Prevention Program	NA	NA	NA
NA	NA	NA	NA	NA	NA	NA	NA	NA	NA	NA	NA	NA	NA	NA	ClinicalTrials		NA	NA	PCORI-1310-06998 Trial of a Decision Support Intervention for Patients and Caregivers Offered Destination Therapy Heart Assist Device	NA	NA	NA	NA	NA	NA	NA	NA	NA	NA	NA	NA	NA	NA	NA	NA	NA	NA	NA	NA	NA	NA	NA	NA	NA	NA	PCORI-1310-06998 Trial of a Decision Support Intervention for Patients and Caregivers Offered Destination Therapy Heart Assist Device	NA	NA	NA
NA		Peer Volunteers Improve Long-term Maintenance of Physical Activity with Older Adults: A Randomized Controlled Trial	NA	NA	NA	NA	NA	NA	NA	NA	NA	NA	NA	NA	NCBI		Buman MP		Peer Volunteers Improve Long-term Maintenance of Physical Activity with Older Adults: A Randomized Controlled Trial	NA	NA	NA	NA	NA	NA	NA	NA	NA	NA	NA	NA	NA	NA	NA	NA	NA	NA	NA	NA	J Phys Act Health. Author manuscript; available in PMC 2011 September 27.Published in final edited form as: J Phys Act Health. 2011 September; 8(Suppl 2): S257???S266.	PMC3181088		NA	NA	NA	NA	NA	NA	NA
NA	NA	NA	NA	NA	NA	NA	NA	NA	NA	NA	NA	NA	NA	NA	ClinicalTrials		NA	NA	Physical Activity and Nutrition Intervention in Afterschool Programs	NA	NA	NA	NA	NA	NA	NA	NA	NA	NA	NA	NA	NA	NA	NA	NA	NA	NA	NA	NA	NA	NA	NA	NA	NA	NA	Physical Activity and Nutrition Intervention in Afterschool Programs	NA	NA	NA
NA		PNAS Plus Significance Statements	NA	NA	NA	NA	NA	NA	NA	NA	NA	NA	NA	NA	NCBI				PNAS Plus Significance Statements	NA	NA	NA	NA	NA	NA	NA	NA	NA	NA	NA	NA	NA	NA	NA	NA	NA	NA	NA	NA	Proc Natl Acad Sci U S A. 2012 December 26; 109(52): 21190. Published online 2012 December 21. doi:??10.1073/pnas.ss10952	PMC3535639		NA	NA	NA	NA	NA	NA	NA
NA	NA	NA	NA	NA	NA	NA	NA	NA	NA	NA	NA	NA	NA	NA	ClinicalTrials		NA	NA	POC - Transfusion Algorithm Cardiac Study	NA	NA	NA	NA	NA	NA	NA	NA	NA	NA	NA	NA	NA	NA	NA	NA	NA	NA	NA	NA	NA	NA	NA	NA	NA	NA	POC - Transfusion Algorithm Cardiac Study	NA	NA	NA
NA	NA	NA	NA	NA	NA	NA	NA	NA	NA	NA	NA	NA	NA	NA	ClinicalTrials		NA	NA	Positive Change Agents Program-Tanzania (Evaluation)	NA	NA	NA	NA	NA	NA	NA	NA	NA	NA	NA	NA	NA	NA	NA	NA	NA	NA	NA	NA	NA	NA	NA	NA	NA	NA	Positive Change Agents Program-Tanzania (Evaluation)	NA	NA	NA
NA	NA	NA	NA	NA	NA	NA	NA	NA	NA	NA	NA	NA	NA	NA	ClinicalTrials		NA	NA	Prehospital Antibiotics Against Sepsis	NA	NA	NA	NA	NA	NA	NA	NA	NA	NA	NA	NA	NA	NA	NA	NA	NA	NA	NA	NA	NA	NA	NA	NA	NA	NA	Prehospital Antibiotics Against Sepsis	NA	NA	NA
NA	NA	NA	NA	NA	NA	NA	NA	NA	NA	NA	NA	NA	NA	NA	ClinicalTrials		NA	NA	Premature Termination of Resuscitation in Survivors of Cardiac Arrest	NA	NA	NA	NA	NA	NA	NA	NA	NA	NA	NA	NA	NA	NA	NA	NA	NA	NA	NA	NA	NA	NA	NA	NA	NA	NA	Premature Termination of Resuscitation in Survivors of Cardiac Arrest	NA	NA	NA
NA	NA	NA	NA	NA	NA	NA	NA	NA	NA	NA	NA	NA	NA	NA	ClinicalTrials		NA	NA	Pressure Ulcer Multi-disciplinary Teams Via Telemedicine (PUMTT): A Trial in Long Term Care	NA	NA	NA	NA	NA	NA	NA	NA	NA	NA	NA	NA	NA	NA	NA	NA	NA	NA	NA	NA	NA	NA	NA	NA	NA	NA	Pressure Ulcer Multi-disciplinary Teams Via Telemedicine (PUMTT): A Trial in Long Term Care	NA	NA	NA
NA	NA	NA	NA	NA	NA	NA	NA	NA	NA	NA	NA	NA	NA	NA	ClinicalTrials		NA	NA	Prevalence of Fabry Disease in a Defined Population at Risk - Patients Formerly Diagnosed With Multiple Sclerosis	NA	NA	NA	NA	NA	NA	NA	NA	NA	NA	NA	NA	NA	NA	NA	NA	NA	NA	NA	NA	NA	NA	NA	NA	NA	NA	Prevalence of Fabry Disease in a Defined Population at Risk - Patients Formerly Diagnosed With Multiple Sclerosis	NA	NA	NA
NA	NA	NA	NA	NA	NA	NA	NA	NA	NA	NA	NA	NA	NA	NA	ClinicalTrials		NA	NA	Prevent Return of Stroke Study	NA	NA	NA	NA	NA	NA	NA	NA	NA	NA	NA	NA	NA	NA	NA	NA	NA	NA	NA	NA	NA	NA	NA	NA	NA	NA	Prevent Return of Stroke Study	NA	NA	NA
NA	NA	NA	NA	NA	NA	NA	NA	NA	NA	NA	NA	NA	NA	NA	ClinicalTrials		NA	NA	Preventing Early Childhood Caries in Indigenous Children: the Baby Teeth Talk Study	NA	NA	NA	NA	NA	NA	NA	NA	NA	NA	NA	NA	NA	NA	NA	NA	NA	NA	NA	NA	NA	NA	NA	NA	NA	NA	Preventing Early Childhood Caries in Indigenous Children: the Baby Teeth Talk Study	NA	NA	NA
NA	NA	NA	NA	NA	NA	NA	NA	NA	NA	NA	NA	NA	NA	NA	ClinicalTrials		NA	NA	Preventing Squamous Cell Skin Cancer	NA	NA	NA	NA	NA	NA	NA	NA	NA	NA	NA	NA	NA	NA	NA	NA	NA	NA	NA	NA	NA	NA	NA	NA	NA	NA	Preventing Squamous Cell Skin Cancer	NA	NA	NA
NA	NA	NA	NA	NA	NA	NA	NA	NA	NA	NA	NA	NA	NA	NA	ClinicalTrials		NA	NA	Prevention of Linear Growth Failure in Infants and Young Children With Lipid-based Nutrient Supplements (iLiNS-DOSE)	NA	NA	NA	NA	NA	NA	NA	NA	NA	NA	NA	NA	NA	NA	NA	NA	NA	NA	NA	NA	NA	NA	NA	NA	NA	NA	Prevention of Linear Growth Failure in Infants and Young Children With Lipid-based Nutrient Supplements (iLiNS-DOSE)	NA	NA	NA
NA	NA	NA	NA	NA	NA	NA	NA	NA	NA	NA	NA	NA	NA	NA	ClinicalTrials		NA	NA	Prevention of Weight Loss in Long Term Care Veterans	NA	NA	NA	NA	NA	NA	NA	NA	NA	NA	NA	NA	NA	NA	NA	NA	NA	NA	NA	NA	NA	NA	NA	NA	NA	NA	Prevention of Weight Loss in Long Term Care Veterans	NA	NA	NA
NA	NA	NA	NA	NA	NA	NA	NA	NA	NA	NA	NA	NA	NA	NA	ClinicalTrials		NA	NA	Primary Care Based Randomized Trial to Reduce Cancer Screening Disparities	NA	NA	NA	NA	NA	NA	NA	NA	NA	NA	NA	NA	NA	NA	NA	NA	NA	NA	NA	NA	NA	NA	NA	NA	NA	NA	Primary Care Based Randomized Trial to Reduce Cancer Screening Disparities	NA	NA	NA
NA	NA	NA	NA	NA	NA	NA	NA	NA	NA	NA	NA	NA	NA	NA	ClinicalTrials		NA	NA	Primary Care Clinician Commitments to Choosing Wisely?ö	NA	NA	NA	NA	NA	NA	NA	NA	NA	NA	NA	NA	NA	NA	NA	NA	NA	NA	NA	NA	NA	NA	NA	NA	NA	NA	Primary Care Clinician Commitments to Choosing Wisely?ö	NA	NA	NA
NA	NA	NA	NA	NA	NA	NA	NA	NA	NA	NA	NA	NA	NA	NA	ClinicalTrials		NA	NA	PROject - Supportive and Palliative Care and INnOvation - Antwerp (Pro-Spinoza)	NA	NA	NA	NA	NA	NA	NA	NA	NA	NA	NA	NA	NA	NA	NA	NA	NA	NA	NA	NA	NA	NA	NA	NA	NA	NA	PROject - Supportive and Palliative Care and INnOvation - Antwerp (Pro-Spinoza)	NA	NA	NA
NA	NA	NA	NA	NA	NA	NA	NA	NA	NA	NA	NA	NA	NA	NA	ClinicalTrials		NA	NA	Promoting Activity and Changes in Eating (PACE) to Reduce Obesity	NA	NA	NA	NA	NA	NA	NA	NA	NA	NA	NA	NA	NA	NA	NA	NA	NA	NA	NA	NA	NA	NA	NA	NA	NA	NA	Promoting Activity and Changes in Eating (PACE) to Reduce Obesity	NA	NA	NA
NA	NA	NA	NA	NA	NA	NA	NA	NA	NA	NA	NA	NA	NA	NA	ClinicalTrials		NA	NA	Promoting Awareness Fetal Movements to Reduce Fetal Mortality Stillbirth, a Stepped Wedge Cluster Randomised Trial.	NA	NA	NA	NA	NA	NA	NA	NA	NA	NA	NA	NA	NA	NA	NA	NA	NA	NA	NA	NA	NA	NA	NA	NA	NA	NA	Promoting Awareness Fetal Movements to Reduce Fetal Mortality Stillbirth, a Stepped Wedge Cluster Randomised Trial.	NA	NA	NA
NA	NA	NA	NA	NA	NA	NA	NA	NA	NA	NA	NA	NA	NA	NA	ClinicalTrials		NA	NA	Promoting Health in Healthy Living Centres - a Clinical Study Among Children	NA	NA	NA	NA	NA	NA	NA	NA	NA	NA	NA	NA	NA	NA	NA	NA	NA	NA	NA	NA	NA	NA	NA	NA	NA	NA	Promoting Health in Healthy Living Centres - a Clinical Study Among Children	NA	NA	NA
NA	NA	NA	NA	NA	NA	NA	NA	NA	NA	NA	NA	NA	NA	NA	ClinicalTrials		NA	NA	Randomized Controlled Trial in South Africa Comparing the Efficacy of Complementary Food Products on Child Growth	NA	NA	NA	NA	NA	NA	NA	NA	NA	NA	NA	NA	NA	NA	NA	NA	NA	NA	NA	NA	NA	NA	NA	NA	NA	NA	Randomized Controlled Trial in South Africa Comparing the Efficacy of Complementary Food Products on Child Growth	NA	NA	NA
NA		Recent advances in rheumatic fever control and future prospects: a WHO Memorandum	NA	NA	NA	NA	NA	NA	NA	NA	NA	NA	NA	NA	NCBI				Recent advances in rheumatic fever control and future prospects: a WHO Memorandum	NA	NA	NA	NA	NA	NA	NA	NA	NA	NA	NA	NA	NA	NA	NA	NA	NA	NA	NA	NA	Bull World Health Organ. 1978; 56(6): 887???912. Correction in: Bull World Health Organ. 1980; 58(1): 159.	PMC2395680		NA	NA	NA	NA	NA	NA	NA
NA	NA	NA	NA	NA	NA	NA	NA	NA	NA	NA	NA	NA	NA	NA	ClinicalTrials		NA	NA	Reducing Hospitalizations of Nursing Home Residents	NA	NA	NA	NA	NA	NA	NA	NA	NA	NA	NA	NA	NA	NA	NA	NA	NA	NA	NA	NA	NA	NA	NA	NA	NA	NA	Reducing Hospitalizations of Nursing Home Residents	NA	NA	NA
NA		Renewal of the Medical Library Assistance Act: a statement of the 1977/78 MLA Legislation Committee.	NA	NA	NA	NA	NA	NA	NA	NA	NA	NA	NA	NA	NCBI				Renewal of the Medical Library Assistance Act: a statement of the 1977/78 MLA Legislation Committee.	NA	NA	NA	NA	NA	NA	NA	NA	NA	NA	NA	NA	NA	NA	NA	NA	NA	NA	NA	NA	Bull Med Libr Assoc. 1978 April; 66(2): 248???252.	PMC199460		NA	NA	NA	NA	NA	NA	NA
NA	NA	NA	NA	NA	NA	NA	NA	NA	NA	NA	NA	NA	NA	NA	ClinicalTrials		NA	NA	Resiliency Program for Medical Interpreters	NA	NA	NA	NA	NA	NA	NA	NA	NA	NA	NA	NA	NA	NA	NA	NA	NA	NA	NA	NA	NA	NA	NA	NA	NA	NA	Resiliency Program for Medical Interpreters	NA	NA	NA
NA	NA	NA	NA	NA	NA	NA	NA	NA	NA	NA	NA	NA	NA	NA	ClinicalTrials		NA	NA	Rhode Island Diastolic Dysfunction - Heart Failure	NA	NA	NA	NA	NA	NA	NA	NA	NA	NA	NA	NA	NA	NA	NA	NA	NA	NA	NA	NA	NA	NA	NA	NA	NA	NA	Rhode Island Diastolic Dysfunction - Heart Failure	NA	NA	NA
NA	NA	NA	NA	NA	NA	NA	NA	NA	NA	NA	NA	NA	NA	NA	ClinicalTrials		NA	NA	Roentgen Stereophotogrammetric Analysis (RSA) to Evaluate Fixation of Biofoam Advance Total Knee Arthroplasty Components	NA	NA	NA	NA	NA	NA	NA	NA	NA	NA	NA	NA	NA	NA	NA	NA	NA	NA	NA	NA	NA	NA	NA	NA	NA	NA	Roentgen Stereophotogrammetric Analysis (RSA) to Evaluate Fixation of Biofoam Advance Total Knee Arthroplasty Components	NA	NA	NA
NA	NA	NA	NA	NA	NA	NA	NA	NA	NA	NA	NA	NA	NA	NA	ClinicalTrials		NA	NA	Safe Touches: A Rigorous Evaluation of a Sexual Abuse Prevention Program for Children	NA	NA	NA	NA	NA	NA	NA	NA	NA	NA	NA	NA	NA	NA	NA	NA	NA	NA	NA	NA	NA	NA	NA	NA	NA	NA	Safe Touches: A Rigorous Evaluation of a Sexual Abuse Prevention Program for Children	NA	NA	NA
NA	NA	NA	NA	NA	NA	NA	NA	NA	NA	NA	NA	NA	NA	NA	ClinicalTrials		NA	NA	Safety and Effectiveness of a Patient Blood Management (PBM) Program in Surgical Patients	NA	NA	NA	NA	NA	NA	NA	NA	NA	NA	NA	NA	NA	NA	NA	NA	NA	NA	NA	NA	NA	NA	NA	NA	NA	NA	Safety and Effectiveness of a Patient Blood Management (PBM) Program in Surgical Patients	NA	NA	NA
NA	NA	NA	NA	NA	NA	NA	NA	NA	NA	NA	NA	NA	NA	NA	ClinicalTrials		NA	NA	Safety and Efficacy of Pimecrolimus Cream 1% in Atopic Disease Modification	NA	NA	NA	NA	NA	NA	NA	NA	NA	NA	NA	NA	NA	NA	NA	NA	NA	NA	NA	NA	NA	NA	NA	NA	NA	NA	Safety and Efficacy of Pimecrolimus Cream 1% in Atopic Disease Modification	NA	NA	NA
NA	NA	NA	NA	NA	NA	NA	NA	NA	NA	NA	NA	NA	NA	NA	ClinicalTrials		NA	NA	Safety Study of the PrePex Device for Non-Surgical Adult Male Circumcision During Phased in National Implementation in an Effort to Prevent the Spread of HIV	NA	NA	NA	NA	NA	NA	NA	NA	NA	NA	NA	NA	NA	NA	NA	NA	NA	NA	NA	NA	NA	NA	NA	NA	NA	NA	Safety Study of the PrePex Device for Non-Surgical Adult Male Circumcision During Phased in National Implementation in an Effort to Prevent the Spread of HIV	NA	NA	NA
NA		Scientific Abstracts	NA	NA	NA	NA	NA	NA	NA	NA	NA	NA	NA	NA	NCBI				Scientific Abstracts	NA	NA	NA	NA	NA	NA	NA	NA	NA	NA	NA	NA	NA	NA	NA	NA	NA	NA	NA	NA	J Gen Intern Med. 2009 April; 24(Suppl 1): 1???380. Published online 2009 April 7. doi:??10.1007/s11606-009-0963-3	PMC2670986		NA	NA	NA	NA	NA	NA	NA
NA	NA	NA	NA	NA	NA	NA	NA	NA	NA	NA	NA	NA	NA	NA	ClinicalTrials		NA	NA	SENSE Theatre Intervention for Children With Autism Spectrum Disorder (ASD)	NA	NA	NA	NA	NA	NA	NA	NA	NA	NA	NA	NA	NA	NA	NA	NA	NA	NA	NA	NA	NA	NA	NA	NA	NA	NA	SENSE Theatre Intervention for Children With Autism Spectrum Disorder (ASD)	NA	NA	NA
NA	NA	NA	NA	NA	NA	NA	NA	NA	NA	NA	NA	NA	NA	NA	ClinicalTrials		NA	NA	Shoe Lifts for Leg Length Inequality in Adults With Knee or Hip Symptoms	NA	NA	NA	NA	NA	NA	NA	NA	NA	NA	NA	NA	NA	NA	NA	NA	NA	NA	NA	NA	NA	NA	NA	NA	NA	NA	Shoe Lifts for Leg Length Inequality in Adults With Knee or Hip Symptoms	NA	NA	NA
NA	NA	NA	NA	NA	NA	NA	NA	NA	NA	NA	NA	NA	NA	NA	ClinicalTrials		NA	NA	Sistas Inspiring Sistas Through Activity and Support	NA	NA	NA	NA	NA	NA	NA	NA	NA	NA	NA	NA	NA	NA	NA	NA	NA	NA	NA	NA	NA	NA	NA	NA	NA	NA	Sistas Inspiring Sistas Through Activity and Support	NA	NA	NA
NA	NA	NA	NA	NA	NA	NA	NA	NA	NA	NA	NA	NA	NA	NA	ClinicalTrials		NA	NA	Skhokho Supporting Success: A Cluster RCT of a Multi-faceted, School-based IPV Prevention Intervention in South Africa	NA	NA	NA	NA	NA	NA	NA	NA	NA	NA	NA	NA	NA	NA	NA	NA	NA	NA	NA	NA	NA	NA	NA	NA	NA	NA	Skhokho Supporting Success: A Cluster RCT of a Multi-faceted, School-based IPV Prevention Intervention in South Africa	NA	NA	NA
NA	NA	NA	NA	NA	NA	NA	NA	NA	NA	NA	NA	NA	NA	NA	ClinicalTrials		NA	NA	Strength and Nutrition Outcomes for Latino Adolescents	NA	NA	NA	NA	NA	NA	NA	NA	NA	NA	NA	NA	NA	NA	NA	NA	NA	NA	NA	NA	NA	NA	NA	NA	NA	NA	Strength and Nutrition Outcomes for Latino Adolescents	NA	NA	NA
NA	NA	NA	NA	NA	NA	NA	NA	NA	NA	NA	NA	NA	NA	NA	ClinicalTrials		NA	NA	Strength Training and Nutrition Development for African American Youth	NA	NA	NA	NA	NA	NA	NA	NA	NA	NA	NA	NA	NA	NA	NA	NA	NA	NA	NA	NA	NA	NA	NA	NA	NA	NA	Strength Training and Nutrition Development for African American Youth	NA	NA	NA
NA	NA	NA	NA	NA	NA	NA	NA	NA	NA	NA	NA	NA	NA	NA	ClinicalTrials		NA	NA	Stroke Oral healthCare pLan Evaluation	NA	NA	NA	NA	NA	NA	NA	NA	NA	NA	NA	NA	NA	NA	NA	NA	NA	NA	NA	NA	NA	NA	NA	NA	NA	NA	Stroke Oral healthCare pLan Evaluation	NA	NA	NA
NA	NA	NA	NA	NA	NA	NA	NA	NA	NA	NA	NA	NA	NA	NA	ClinicalTrials		NA	NA	Study of a Healthy Lifestyle Intervention for Deaf Adults Who Are Overweight or Obese	NA	NA	NA	NA	NA	NA	NA	NA	NA	NA	NA	NA	NA	NA	NA	NA	NA	NA	NA	NA	NA	NA	NA	NA	NA	NA	Study of a Healthy Lifestyle Intervention for Deaf Adults Who Are Overweight or Obese	NA	NA	NA
NA	NA	NA	NA	NA	NA	NA	NA	NA	NA	NA	NA	NA	NA	NA	ClinicalTrials		NA	NA	Study of a Quality Improvement Toolkit in Kerala, India, Among Hospitals Treating Acute Coronary Syndrome Patients	NA	NA	NA	NA	NA	NA	NA	NA	NA	NA	NA	NA	NA	NA	NA	NA	NA	NA	NA	NA	NA	NA	NA	NA	NA	NA	Study of a Quality Improvement Toolkit in Kerala, India, Among Hospitals Treating Acute Coronary Syndrome Patients	NA	NA	NA
NA	NA	NA	NA	NA	NA	NA	NA	NA	NA	NA	NA	NA	NA	NA	ClinicalTrials		NA	NA	Study to Evaluate the Health and Wellness Policies of the New Haven Public School District.	NA	NA	NA	NA	NA	NA	NA	NA	NA	NA	NA	NA	NA	NA	NA	NA	NA	NA	NA	NA	NA	NA	NA	NA	NA	NA	Study to Evaluate the Health and Wellness Policies of the New Haven Public School District.	NA	NA	NA
NA	NA	NA	NA	NA	NA	NA	NA	NA	NA	NA	NA	NA	NA	NA	AdditionalRecords		NA	NA	Supporting family caregivers to identify their own needs in end-of-life care: Qualitative findings from a stepped wedge cluster trial	NA	NA	NA	NA	NA	NA	NA	NA	NA	NA	NA	NA	NA	NA	NA	NA	NA	NA	NA	NA	NA	NA	NA	NA	NA		Supporting family caregivers to identify their own needs in end-of-life care: Qualitative findings from a stepped wedge cluster trial		NA	NA
NA	NA	NA	NA	NA	NA	NA	NA	NA	NA	NA	NA	NA	NA	NA	ClinicalTrials		NA	NA	TB (Tuberculosis) Preventive Therapy for HIV Patients With Access to HAART (Highly Active Antiretroviral Therapy)	NA	NA	NA	NA	NA	NA	NA	NA	NA	NA	NA	NA	NA	NA	NA	NA	NA	NA	NA	NA	NA	NA	NA	NA	NA	NA	TB (Tuberculosis) Preventive Therapy for HIV Patients With Access to HAART (Highly Active Antiretroviral Therapy)	NA	NA	NA
NA	NA	NA	NA	NA	NA	NA	NA	NA	NA	NA	NA	NA	NA	NA	ClinicalTrials		NA	NA	Testing and Linkage to Care for Injecting Drug Users in Kenya	NA	NA	NA	NA	NA	NA	NA	NA	NA	NA	NA	NA	NA	NA	NA	NA	NA	NA	NA	NA	NA	NA	NA	NA	NA	NA	Testing and Linkage to Care for Injecting Drug Users in Kenya	NA	NA	NA
NA	NA	NA	NA	NA	NA	NA	NA	NA	NA	NA	NA	NA	NA	NA	ClinicalTrials		NA	NA	Texting to Improve Testing (TextIT):	NA	NA	NA	NA	NA	NA	NA	NA	NA	NA	NA	NA	NA	NA	NA	NA	NA	NA	NA	NA	NA	NA	NA	NA	NA	NA	Texting to Improve Testing (TextIT):	NA	NA	NA
NA	NA	NA	NA	NA	NA	NA	NA	NA	NA	NA	NA	NA	NA	NA	ClinicalTrials		NA	NA	The \START\" (a Streamlined ART Initiation Strategy) Study"	NA	NA	NA	NA	NA	NA	NA	NA	NA	NA	NA	NA	NA	NA	NA	NA	NA	NA	NA	NA	NA	NA	NA	NA	NA	NA	The \START\" (a Streamlined ART Initiation Strategy) Study"	NA	NA	NA
NA	NA	NA	NA	NA	NA	NA	NA	NA	NA	NA	NA	NA	NA	NA	ClinicalTrials		NA	NA	The Delayed Intervention and Surveillance for Small Renal Masses (DISSRM) Registry	NA	NA	NA	NA	NA	NA	NA	NA	NA	NA	NA	NA	NA	NA	NA	NA	NA	NA	NA	NA	NA	NA	NA	NA	NA	NA	The Delayed Intervention and Surveillance for Small Renal Masses (DISSRM) Registry	NA	NA	NA
NA	NA	NA	NA	NA	NA	NA	NA	NA	NA	NA	NA	NA	NA	NA	ClinicalTrials		NA	NA	The Effect of CME on Early Cancer Diagnosis in General Practice	NA	NA	NA	NA	NA	NA	NA	NA	NA	NA	NA	NA	NA	NA	NA	NA	NA	NA	NA	NA	NA	NA	NA	NA	NA	NA	The Effect of CME on Early Cancer Diagnosis in General Practice	NA	NA	NA
NA	NA	NA	NA	NA	NA	NA	NA	NA	NA	NA	NA	NA	NA	NA	ClinicalTrials		NA	NA	The Effectiveness of Operant Learning Versus Energy Conservation Activity Pacing Treatments in Fibromyalgia	NA	NA	NA	NA	NA	NA	NA	NA	NA	NA	NA	NA	NA	NA	NA	NA	NA	NA	NA	NA	NA	NA	NA	NA	NA	NA	The Effectiveness of Operant Learning Versus Energy Conservation Activity Pacing Treatments in Fibromyalgia	NA	NA	NA
NA	NA	NA	NA	NA	NA	NA	NA	NA	NA	NA	NA	NA	NA	NA	ClinicalTrials		NA	NA	The GREEN Project Lunch Box Study	NA	NA	NA	NA	NA	NA	NA	NA	NA	NA	NA	NA	NA	NA	NA	NA	NA	NA	NA	NA	NA	NA	NA	NA	NA	NA	The GREEN Project Lunch Box Study	NA	NA	NA
NA	NA	NA	NA	NA	NA	NA	NA	NA	NA	NA	NA	NA	NA	NA	ClinicalTrials		NA	NA	The Healthy Lifestyle Project	NA	NA	NA	NA	NA	NA	NA	NA	NA	NA	NA	NA	NA	NA	NA	NA	NA	NA	NA	NA	NA	NA	NA	NA	NA	NA	The Healthy Lifestyle Project	NA	NA	NA
NA	NA	NA	NA	NA	NA	NA	NA	NA	NA	NA	NA	NA	NA	NA	ClinicalTrials		NA	NA	The Healthy Weight for Life Program	NA	NA	NA	NA	NA	NA	NA	NA	NA	NA	NA	NA	NA	NA	NA	NA	NA	NA	NA	NA	NA	NA	NA	NA	NA	NA	The Healthy Weight for Life Program	NA	NA	NA
NA	NA	NA	NA	NA	NA	NA	NA	NA	NA	NA	NA	NA	NA	NA	ClinicalTrials		NA	NA	The Impact of a Brief Educational Intervention on Glaucoma Adherence	NA	NA	NA	NA	NA	NA	NA	NA	NA	NA	NA	NA	NA	NA	NA	NA	NA	NA	NA	NA	NA	NA	NA	NA	NA	NA	The Impact of a Brief Educational Intervention on Glaucoma Adherence	NA	NA	NA
NA	NA	NA	NA	NA	NA	NA	NA	NA	NA	NA	NA	NA	NA	NA	ClinicalTrials		NA	NA	The MONARCA Project (MONitoring, treAtment and pRediCtion of bipolAr Disorder Episodes)	NA	NA	NA	NA	NA	NA	NA	NA	NA	NA	NA	NA	NA	NA	NA	NA	NA	NA	NA	NA	NA	NA	NA	NA	NA	NA	The MONARCA Project (MONitoring, treAtment and pRediCtion of bipolAr Disorder Episodes)	NA	NA	NA
NA	NA	NA	NA	NA	NA	NA	NA	NA	NA	NA	NA	NA	NA	NA	ClinicalTrials		NA	NA	The Neuro-protective Effects of Exercise in Children With Brain Tumors	NA	NA	NA	NA	NA	NA	NA	NA	NA	NA	NA	NA	NA	NA	NA	NA	NA	NA	NA	NA	NA	NA	NA	NA	NA	NA	The Neuro-protective Effects of Exercise in Children With Brain Tumors	NA	NA	NA
NA	NA	NA	NA	NA	NA	NA	NA	NA	NA	NA	NA	NA	NA	NA	ClinicalTrials		NA	NA	The Strategies for Post Arrest Resuscitation and Care Network	NA	NA	NA	NA	NA	NA	NA	NA	NA	NA	NA	NA	NA	NA	NA	NA	NA	NA	NA	NA	NA	NA	NA	NA	NA	NA	The Strategies for Post Arrest Resuscitation and Care Network	NA	NA	NA
NA	NA	NA	NA	NA	NA	NA	NA	NA	NA	NA	NA	NA	NA	NA	ClinicalTrials		NA	NA	The Use of Smart Scales for Weight Gain Prevention in African American Breast Cancer Survivors	NA	NA	NA	NA	NA	NA	NA	NA	NA	NA	NA	NA	NA	NA	NA	NA	NA	NA	NA	NA	NA	NA	NA	NA	NA	NA	The Use of Smart Scales for Weight Gain Prevention in African American Breast Cancer Survivors	NA	NA	NA
NA	NA	NA	NA	NA	NA	NA	NA	NA	NA	NA	NA	NA	NA	NA	ClinicalTrials		NA	NA	The WEIGH Study: Weighing to Improve and Gain Health	NA	NA	NA	NA	NA	NA	NA	NA	NA	NA	NA	NA	NA	NA	NA	NA	NA	NA	NA	NA	NA	NA	NA	NA	NA	NA	The WEIGH Study: Weighing to Improve and Gain Health	NA	NA	NA
NA	NA	NA	NA	NA	NA	NA	NA	NA	NA	NA	NA	NA	NA	NA	ClinicalTrials		NA	NA	The Weight-Wise Weight Loss Translation Study	NA	NA	NA	NA	NA	NA	NA	NA	NA	NA	NA	NA	NA	NA	NA	NA	NA	NA	NA	NA	NA	NA	NA	NA	NA	NA	The Weight-Wise Weight Loss Translation Study	NA	NA	NA
NA	NA	NA	NA	NA	NA	NA	NA	NA	NA	NA	NA	NA	NA	NA	ClinicalTrials		NA	NA	Timing of Initiation of Continuous Glucose Monitoring in Established Pediatric Diabetes (The CGM TIME Trial)	NA	NA	NA	NA	NA	NA	NA	NA	NA	NA	NA	NA	NA	NA	NA	NA	NA	NA	NA	NA	NA	NA	NA	NA	NA	NA	Timing of Initiation of Continuous Glucose Monitoring in Established Pediatric Diabetes (The CGM TIME Trial)	NA	NA	NA
NA	NA	NA	NA	NA	NA	NA	NA	NA	NA	NA	NA	NA	NA	NA	ClinicalTrials		NA	NA	Translating Dietary Trials Into the Community	NA	NA	NA	NA	NA	NA	NA	NA	NA	NA	NA	NA	NA	NA	NA	NA	NA	NA	NA	NA	NA	NA	NA	NA	NA	NA	Translating Dietary Trials Into the Community	NA	NA	NA
NA		Translational regulation of histone synthesis in the sea urchin strongylocentrotus purpuratus	NA	NA	NA	NA	NA	NA	NA	NA	NA	NA	NA	NA	NCBI		Herlands L		Translational regulation of histone synthesis in the sea urchin strongylocentrotus purpuratus	NA	NA	NA	NA	NA	NA	NA	NA	NA	NA	NA	NA	NA	NA	NA	NA	NA	NA	NA	NA	J Cell Biol. 1982 July 1; 94(1): 219???223.	PMC2112183		NA	NA	NA	NA	NA	NA	NA
NA	NA	NA	NA	NA	NA	NA	NA	NA	NA	NA	NA	NA	NA	NA	ClinicalTrials		NA	NA	Treatment of Hypotension of Prematurity (TOHOP)	NA	NA	NA	NA	NA	NA	NA	NA	NA	NA	NA	NA	NA	NA	NA	NA	NA	NA	NA	NA	NA	NA	NA	NA	NA	NA	Treatment of Hypotension of Prematurity (TOHOP)	NA	NA	NA
NA	NA	NA	NA	NA	NA	NA	NA	NA	NA	NA	NA	NA	NA	NA	ClinicalTrials		NA	NA	Treatment of Posttraumatic Stress Disorder in Kosovar High School Students Using Mind-Body Skills Groups	NA	NA	NA	NA	NA	NA	NA	NA	NA	NA	NA	NA	NA	NA	NA	NA	NA	NA	NA	NA	NA	NA	NA	NA	NA	NA	Treatment of Posttraumatic Stress Disorder in Kosovar High School Students Using Mind-Body Skills Groups	NA	NA	NA
NA	NA	NA	NA	NA	NA	NA	NA	NA	NA	NA	NA	NA	NA	NA	ClinicalTrials		NA	NA	Trial of Inserting Prevalence Information Into Lumbar Spine Imaging Reports	NA	NA	NA	NA	NA	NA	NA	NA	NA	NA	NA	NA	NA	NA	NA	NA	NA	NA	NA	NA	NA	NA	NA	NA	NA	NA	Trial of Inserting Prevalence Information Into Lumbar Spine Imaging Reports	NA	NA	NA
NA	NA	NA	NA	NA	NA	NA	NA	NA	NA	NA	NA	NA	NA	NA	ClinicalTrials		NA	NA	Tu Salud Si Cuenta Worksite: Pilot Intervention Study	NA	NA	NA	NA	NA	NA	NA	NA	NA	NA	NA	NA	NA	NA	NA	NA	NA	NA	NA	NA	NA	NA	NA	NA	NA	NA	Tu Salud Si Cuenta Worksite: Pilot Intervention Study	NA	NA	NA
NA	NA	NA	NA	NA	NA	NA	NA	NA	NA	NA	NA	NA	NA	NA	ClinicalTrials		NA	NA	Turn up the HEAT - Healthy Eating and Activity Time in Summer Day Camps	NA	NA	NA	NA	NA	NA	NA	NA	NA	NA	NA	NA	NA	NA	NA	NA	NA	NA	NA	NA	NA	NA	NA	NA	NA	NA	Turn up the HEAT - Healthy Eating and Activity Time in Summer Day Camps	NA	NA	NA
NA	NA	NA	NA	NA	NA	NA	NA	NA	NA	NA	NA	NA	NA	NA	ClinicalTrials		NA	NA	Understanding Health Care Information for African Americans With High Blood Pressure	NA	NA	NA	NA	NA	NA	NA	NA	NA	NA	NA	NA	NA	NA	NA	NA	NA	NA	NA	NA	NA	NA	NA	NA	NA	NA	Understanding Health Care Information for African Americans With High Blood Pressure	NA	NA	NA
NA	NA	NA	NA	NA	NA	NA	NA	NA	NA	NA	NA	NA	NA	NA	ClinicalTrials		NA	NA	Washington State Community Expedited Partner Treatment (EPT) Trial	NA	NA	NA	NA	NA	NA	NA	NA	NA	NA	NA	NA	NA	NA	NA	NA	NA	NA	NA	NA	NA	NA	NA	NA	NA	NA	Washington State Community Expedited Partner Treatment (EPT) Trial	NA	NA	NA
NA	NA	NA	NA	NA	NA	NA	NA	NA	NA	NA	NA	NA	NA	NA	ClinicalTrials		NA	NA	Wellness Interventions After Transplant Study	NA	NA	NA	NA	NA	NA	NA	NA	NA	NA	NA	NA	NA	NA	NA	NA	NA	NA	NA	NA	NA	NA	NA	NA	NA	NA	Wellness Interventions After Transplant Study	NA	NA	NA
NA	NA	NA	NA	NA	NA	NA	NA	NA	NA	NA	NA	NA	NA	NA	ClinicalTrials		NA	NA	Wellness Program Implementation: School & Student Toolkits	NA	NA	NA	NA	NA	NA	NA	NA	NA	NA	NA	NA	NA	NA	NA	NA	NA	NA	NA	NA	NA	NA	NA	NA	NA	NA	Wellness Program Implementation: School & Student Toolkits	NA	NA	NA
NA		Work in brief	NA	NA	NA	NA	NA	NA	NA	NA	NA	NA	NA	NA	NCBI				Work in brief	NA	NA	NA	NA	NA	NA	NA	NA	NA	NA	NA	NA	NA	NA	NA	NA	NA	NA	NA	NA	Occup Environ Med. 2007 March; 64(3): 141.	PMC2092531		NA	NA	NA	NA	NA	NA	NA
NA	NA	NA	NA	NA	NA	NA	NA	NA	NA	NA	NA	NA	NA	NA	ClinicalTrials		NA	NA	Xpert MTB/Rif, a New Tool for the Diagnosis of Pulmonary Tuberculosis in Two Municipalities in Brazil	NA	NA	NA	NA	NA	NA	NA	NA	NA	NA	NA	NA	NA	NA	NA	NA	NA	NA	NA	NA	NA	NA	NA	NA	NA	NA	Xpert MTB/Rif, a New Tool for the Diagnosis of Pulmonary Tuberculosis in Two Municipalities in Brazil	NA	NA	NA
NA		Yale University School of Medicine Thesis Abstracts - 2004.	NA	NA	NA	NA	NA	NA	NA	NA	NA	NA	NA	NA	NCBI				Yale University School of Medicine Thesis Abstracts - 2004.	NA	NA	NA	NA	NA	NA	NA	NA	NA	NA	NA	NA	NA	NA	NA	NA	NA	NA	NA	NA	Yale J Biol Med. 2004 January; 77(1-2): 1???52.	PMC2259133		NA	NA	NA	NA	NA	NA	NA
NA	NA	NA	NA	NA	NA	NA	NA	NA	NA	NA	NA	NA	NA	NA	Ovid	,			Hospitals disappointed with final payment rule.[Article]	NA	NA	NA	NA	NA	NA	NA	NA	NA	NA	NA	NA	NA	NA	NA	NA	NA	NA	NA	NA	NA	NA	NA	Journals@Ovid Full Text	00007447-201402000-00012.	,	Hospitals disappointed with final payment rule.[Article]	Same-Day Surgery. 38(2):21-22, February 2014.	NA	Article.
NA	NA	NA	NA	NA	NA	NA	NA	NA	NA	NA	NA	NA	NA	NA	Ovid	,			On-again, off-again ICD-10 is on again.[Article]	NA	NA	NA	NA	NA	NA	NA	NA	NA	NA	NA	NA	NA	NA	NA	NA	NA	NA	NA	NA	NA	NA	NA	Journals@Ovid Full Text	00055757-201410000-00008.	,	On-again, off-again ICD-10 is on again.[Article]	Hospital Case Management. 22(10):143, October 2014.	NA	Articles.
NA	NA	NA	NA	NA	NA	NA	NA	NA	NA	NA	NA	NA	NA	NA	Ovid	,			Symbol.Thermal Therapy for Back Pain Draws Criticism.[Article]	NA	NA	NA	NA	NA	NA	NA	NA	NA	NA	NA	NA	NA	NA	NA	NA	NA	NA	NA	NA	NA	NA	NA	Journals@Ovid Full Text	00129290-200007000-00001.	,	Symbol.Thermal Therapy for Back Pain Draws Criticism.[Article]	Joint Letter. 6(7):73,80,81,82,, July 2000.	NA	article.
NA	[Anonymous]	DELAYED INTRODUCTION OF REGULATORY SYSTEM FOR SALES TAXES IN EUROPEAN COMMON MARKET	ERDOL UND KOHLE ERDGAS PETROCHEMIE	NA	NA	NA	NA	NA	NA	NA	22	NA	NA	NA	WebOfKnowledge	[Anonymous]			DELAYED INTRODUCTION OF REGULATORY SYSTEM FOR SALES TAXES IN EUROPEAN COMMON MARKET	NA	NA	NA	NA	NA	11		2	NA		NA		NA	NA	NA	NA	NA	NA	NA	NA	NA	NA	NA	NA	NA	NA	NA	NA	NA	NA
NA	[Anonymous]	Geographic composition of the Health Service Delivery Areas (HSDA) established by regulations of the Indian Health Service--PHS. Notice.	Federal register	NA	NA	NA	NA	NA	NA	NA	53	NA	10288494	NA	WebOfKnowledge	[Anonymous]			Geographic composition of the Health Service Delivery Areas (HSDA) established by regulations of the Indian Health Service--PHS. Notice.	NA	NA	NA	NA	NA	165		645	NA		NA	0097-6326	NA	NA	NA	NA	NA	NA	NA	NA	NA	NA	NA	NA	NA	NA	NA	NA	NA	NA
NA	???Ð????Ý; ??????¸; HwangInNam; HwangYunChan; ??????; ????; ??í??; OhWonMann	A COMPARATIVE STUDY ON RADIOPACITY OF ROOT CANAL SEALERS	Restorative Dentistry and Endodontics	NA	NA	NA	NA	NA	NA	NA	61	NA	NA	NA	WebOfKnowledge	???Ð????Ý; ??????¸; HwangInNam; HwangYunChan; ??????; ????; ??í??; OhWonMann			A COMPARATIVE STUDY ON RADIOPACITY OF ROOT CANAL SEALERS	NA	NA	NA	NA	NA	1		696	NA		NA	2234-7658	NA	NA	NA	NA	NA	NA	NA	NA	NA	NA	NA	NA	NA	NA	NA	NA	NA	NA
NA	????”?; ??????¸; HwangYunChan; HwangInNam; OhWonMann	A comparative study on radiopacity of canal filling and retrograde root-end filling materials	Restorative Dentistry and Endodontics	NA	NA	NA	NA	NA	NA	NA	60	NA	NA	NA	WebOfKnowledge	????”?; ??????¸; HwangYunChan; HwangInNam; OhWonMann			A comparative study on radiopacity of canal filling and retrograde root-end filling materials	NA	NA	NA	NA	NA	2		58	NA		NA	2234-7658	NA	NA	NA	NA	NA	NA	NA	NA	NA	NA	NA	NA	NA	NA	NA	NA	NA	NA
NA	????í??; ??¸??; ???????	A fractal analysis of bone phantoms from digital images	Imaging Science in Dentistry	NA	NA	NA	NA	NA	NA	NA	63	NA	NA	NA	WebOfKnowledge	????í??; ??¸??; ???????			A fractal analysis of bone phantoms from digital images	NA	NA	NA	NA	NA	1		505	NA		NA	2233-7822	NA	NA	NA	NA	NA	NA	NA	NA	NA	NA	NA	NA	NA	NA	NA	NA	NA	NA
NA	?¸?”Ð??; ????Ý??; Ð??Ý??; ??????	A Case of Rapidly Progressive Dementia caused by Idiopathic Hypereosinophilic Syndrome	Journal of the Korean Neurological Association	NA	NA	NA	NA	NA	NA	NA	72	NA	NA	NA	WebOfKnowledge	?¸?”Ð??; ????Ý??; Ð??Ý??; ??????	Kwak YT		A Case of Rapidly Progressive Dementia caused by Idiopathic Hypereosinophilic Syndrome	NA	NA	NA	NA	NA	5		694	NA		NA	1225-7044	NA	NA	NA	NA	NA	NA	NA	NA	NA	NA	NA	NA	NA	NA	NA	NA	NA	NA
NA	Ð?”??; HO, HWANG JAE	Noise Modeling for CR Images of High-strength Materials	Signal Processing	NA	NA	NA	NA	NA	NA	NA	77	NA	NA	NA	WebOfKnowledge	Ð?”??; HO, HWANG JAE			Noise Modeling for CR Images of High-strength Materials	NA	NA	NA	NA	NA	5		14	NA		NA	1229-6384	NA	NA	NA	NA	NA	NA	NA	NA	NA	NA	NA	NA	NA	NA	NA	NA	NA	NA
NA	??Ø????; ??Ý??; ????????; Ð???¸Ð??; ????; Ð????Ý?; ?????	The effects of voltage of x-ray tube on fractal dimension and anisotropy of diagnostic image	Imaging Science in Dentistry	NA	NA	NA	NA	NA	NA	NA	66	NA	NA	NA	WebOfKnowledge	??Ø????; ??Ý??; ????????; Ð???¸Ð??; ????; Ð????Ý?; ?????	Baik JS		The effects of voltage of x-ray tube on fractal dimension and anisotropy of diagnostic image	NA	NA	NA	NA	NA	4		287	NA		NA	2233-7822	NA	NA	NA	NA	NA	NA	NA	NA	NA	NA	NA	NA	NA	NA	NA	NA	NA	NA
NA	?????; Ð????Ð?; Kwon, Taeyub	Radiopacity of Self-Adhesive Resin Cements using a Digital X-ray System	J. Korea Res. Soc. Dent. Mater.	NA	NA	NA	NA	NA	NA	NA	68	NA	NA	NA	WebOfKnowledge	?????; Ð????Ð?; Kwon, Taeyub			Radiopacity of Self-Adhesive Resin Cements using a Digital X-ray System	NA	NA	NA	NA	NA	2		184	NA		NA	1225-1631	NA	NA	NA	NA	NA	NA	NA	NA	NA	NA	NA	NA	NA	NA	NA	NA	NA	NA
NA	?????; ???Ð??; LEE, Kyu-Bok	Evaluation of the Radiopacity of Contemporary Luting Cements by Digital Radiography	Journal of Dental Rehabilitation and Applied Science	NA	NA	NA	NA	NA	NA	NA	54	NA	NA	NA	WebOfKnowledge	?????; ???Ð??; LEE, Kyu-Bok			Evaluation of the Radiopacity of Contemporary Luting Cements by Digital Radiography	NA	NA	NA	NA	NA	4		487	NA		NA	2233-4084	NA	NA	NA	NA	NA	NA	NA	NA	NA	NA	NA	NA	NA	NA	NA	NA	NA	NA
NA	?í??	Search for Peaceful Resolution of the North Korean Nuclear Issue	International Journal of Korean Unification Studies	NA	NA	NA	NA	NA	NA	NA	15	NA	NA	NA	WebOfKnowledge	?í??			Search for Peaceful Resolution of the North Korean Nuclear Issue	NA	NA	NA	NA	NA	1		676	NA		NA	1229-6902	NA	NA	NA	NA	NA	NA	NA	NA	NA	NA	NA	NA	NA	NA	NA	NA	NA	NA
NA	??¸???	The Institution of Court Costume in the Year 1900 (the 4th Year of Korean Empire Gwangmu) and the Symbolism of Mugunghwa, the Rose of Sharon Pattern	Journal of the Korean Society of Costume	NA	NA	NA	NA	NA	NA	NA	41	NA	NA	NA	WebOfKnowledge	??¸???			The Institution of Court Costume in the Year 1900 (the 4th Year of Korean Empire Gwangmu) and the Symbolism of Mugunghwa, the Rose of Sharon Pattern	NA	NA	NA	NA	NA	3		131	NA		NA	1229-6880	NA	NA	NA	NA	NA	NA	NA	NA	NA	NA	NA	NA	NA	NA	NA	NA	NA	NA
NA	??Ð??; ??Ð?¥?í?; ?????Ðí; ???????; Ñ??¸?¡?	EVALUATION OF RADIOPACITY AND DISCRIMINABILITY OF VARIOUS FIBER REINFORCED COMPOSITE POSTS	Restorative Dentistry and Endodontics	NA	NA	NA	NA	NA	NA	NA	63	NA	NA	NA	WebOfKnowledge	??Ð??; ??Ð?¥?í?; ?????Ðí; ???????; Ñ??¸?¡?			EVALUATION OF RADIOPACITY AND DISCRIMINABILITY OF VARIOUS FIBER REINFORCED COMPOSITE POSTS	NA	NA	NA	NA	NA	3		263	NA		NA	2234-7658	NA	NA	NA	NA	NA	NA	NA	NA	NA	NA	NA	NA	NA	NA	NA	NA	NA	NA
NA	??Ý?; ??????; ???Ð????; ?????Ð??	The Effect of Early Removal of Mesiodens for the Correction of Central Incisor Rotation	Journal of the Korean academy of pediatric dentistry	NA	NA	NA	NA	NA	NA	NA	101	NA	NA	NA	WebOfKnowledge	??Ý?; ??????; ???Ð????; ?????Ð??			The Effect of Early Removal of Mesiodens for the Correction of Central Incisor Rotation	NA	NA	NA	NA	NA	1		715	NA		NA	1226-8496	NA	NA	NA	NA	NA	NA	NA	NA	NA	NA	NA	NA	NA	NA	NA	NA	NA	NA
NA	????; Ñ??½?; ?Ý????; Park, Jeongkil; Ð????; Kim, Hyeoncheol	Physical properties of novel composite using Portland cement for retro-filling material	Restorative Dentistry and Endodontics	NA	NA	NA	NA	NA	NA	NA	63	NA	NA	NA	WebOfKnowledge	????; Ñ??½?; ?Ý????; Park, Jeongkil; Ð????; Kim, Hyeoncheol			Physical properties of novel composite using Portland cement for retro-filling material	NA	NA	NA	NA	NA	6		549	NA		NA	2234-7658	NA	NA	NA	NA	NA	NA	NA	NA	NA	NA	NA	NA	NA	NA	NA	NA	NA	NA
NA	?????Ø; ?????¸; ??????; Ñ??Ð??	The efficacy evaluation of PostPlant(TM) Calcium in dental implant placement	The Journal of Korean Academy of Prosthodontics	NA	NA	NA	NA	NA	NA	NA	84	NA	NA	NA	WebOfKnowledge	?????Ø; ?????¸; ??????; Ñ??Ð??			The efficacy evaluation of PostPlant(TM) Calcium in dental implant placement	NA	NA	NA	NA	NA	2		123	NA		NA	0301-2875	NA	NA	NA	NA	NA	NA	NA	NA	NA	NA	NA	NA	NA	NA	NA	NA	NA	NA
NA	Ñ??Ø??í	Delayed Introduction of Private Investigation and Direction	The Korean Association of Police Science Review	NA	NA	NA	NA	NA	NA	NA	15	NA	NA	NA	WebOfKnowledge	Ñ??Ø??í			Delayed Introduction of Private Investigation and Direction	NA	NA	NA	NA	NA	4		271	NA		NA	1598-6829	NA	NA	NA	NA	NA	NA	NA	NA	NA	NA	NA	NA	NA	NA	NA	NA	NA	NA
NA	?Ð???; Bang, Myung-Ha	The Impact of the ERP Go-Live Issues on User Satisfaction	Information Systems Review	NA	NA	NA	NA	NA	NA	NA	70	NA	NA	NA	WebOfKnowledge	?Ð???; Bang, Myung-Ha			The Impact of the ERP Go-Live Issues on User Satisfaction	NA	NA	NA	NA	NA	1		187	NA		NA	1229-5078	NA	NA	NA	NA	NA	NA	NA	NA	NA	NA	NA	NA	NA	NA	NA	NA	NA	NA
NA	NA	NA	NA	NA	NA	NA	NA	NA	NA	NA	NA	NA	NA	NA	Ovid	2007 WRITING COMMITTEE MEMBERS; Anderson, Jeffrey L. MD, FACC, FAHA; Chair; Adams, Cynthia D. RN, PhD, FAHA; Antman, Elliott M. MD, FACC, FAHA; Bridges, Charles R. MD, ScD, FACC, FAHA; Califf, Robert M. MD, MACC; Casey, Donald E. Jr MD, MPH, MBA, FACP; Chavey, William E. II MD, MS; Fesmire, Francis M. MD, FACEP; Hochman, Judith S. MD, FACC, FAHA; Levin, Thomas N. MD, FACC, FSCAI; Lincoff, A. Mich…			2012 ACCF/AHA Focused Update Incorporated Into the ACCF/AHA 2007 Guidelines for the Management of Patients With Unstable Angina/Non-ST-Elevation Myocardial Infarction: A Report of the American College of Cardiology Foundation/American Heart Association Task Force on Practice Guidelines.[Miscellaneous Article]	NA	NA	NA	NA	NA	NA	NA	NA	NA	NA	NA	NA	NA	NA	NA	NA	NA	NA	NA	NA	NA	NA	NA	Journals@Ovid Full Text	00003017-201306110-00017.	2007 WRITING COMMITTEE MEMBERS; Anderson, Jeffrey L. MD, FACC, FAHA; Chair; Adams, Cynthia D. RN, PhD, FAHA; Antman, Elliott M. MD, FACC, FAHA; Bridges, Charles R. MD, ScD, FACC, FAHA; Califf, Robert M. MD, MACC; Casey, Donald E. Jr MD, MPH, MBA, FACP; Chavey, William E. II MD, MS; Fesmire, Francis M. MD, FACEP; Hochman, Judith S. MD, FACC, FAHA; Levin, Thomas N. MD, FACC, FSCAI; Lincoff, A. Mich…	2012 ACCF/AHA Focused Update Incorporated Into the ACCF/AHA 2007 Guidelines for the Management of Patients With Unstable Angina/Non-ST-Elevation Myocardial Infarction: A Report of the American College of Cardiology Foundation/American Heart Association Task Force on Practice Guidelines.[Miscellaneous Article]	Circulation. 127(23):e663-e828, June 11, 2013.	NA	ACCF/AHA Practice Guideline.
NA	NA	NA	NA	NA	NA	NA	NA	NA	NA	NA	NA	NA	NA	NA	Ovid	2011 Writing Group Members; Wright, R. Scott MD, FACC, FAHA; Chair *; Anderson, Jeffrey L. MD, FACC, FAHA, Vice; Chair *,+; Adams, Cynthia D. RN, PhD, FAHA *; Bridges, Charles R. MD, ScD, FACC, FAHA +,++; Casey, Donald E. Jr MD, MPH, MBA, FACP, FAHA [S]; Ettinger, Steven M. MD, FACC ||; Fesmire, Francis M. MD, FACEP [P]; Ganiats, Theodore G. MD #; Jneid, Hani MD, FACC, FAHA *; Lincoff, A. Michael…			2011 ACCF/AHA Focused Update of the Guidelines for the Management of Patients With Unstable Angina/ Non-ST-Elevation Myocardial Infarction (Updating the 2007 Guideline): A Report of the American College of Cardiology Foundation/American Heart Association Task Force on Practice Guidelines.[Miscellaneous Article]	NA	NA	NA	NA	NA	NA	NA	NA	NA	NA	NA	NA	NA	NA	NA	NA	NA	NA	NA	NA	NA	NA	NA	Journals@Ovid Full Text	00003017-201105100-00016.	2011 Writing Group Members; Wright, R. Scott MD, FACC, FAHA; Chair *; Anderson, Jeffrey L. MD, FACC, FAHA, Vice; Chair *,+; Adams, Cynthia D. RN, PhD, FAHA *; Bridges, Charles R. MD, ScD, FACC, FAHA +,++; Casey, Donald E. Jr MD, MPH, MBA, FACP, FAHA [S]; Ettinger, Steven M. MD, FACC ||; Fesmire, Francis M. MD, FACEP [P]; Ganiats, Theodore G. MD #; Jneid, Hani MD, FACC, FAHA *; Lincoff, A. Michael…	2011 ACCF/AHA Focused Update of the Guidelines for the Management of Patients With Unstable Angina/ Non-ST-Elevation Myocardial Infarction (Updating the 2007 Guideline): A Report of the American College of Cardiology Foundation/American Heart Association Task Force on Practice Guidelines.[Miscellaneous Article]	Circulation. 123(18):2022-2060, May 10, 2011.	NA	ACCF/AHA Focused Update.
NA	NA	NA	NA	NA	NA	NA	NA	NA	NA	NA	NA	NA	NA	NA	Ovid	2012 Writing Committee Members *; Jneid, Hani MD, FACC, FAHA; Chair +; Anderson, Jeffrey L. MD, FACC, FAHA; Vice Chair +,++; Wright, R. Scott MD, FACC, FAHA; Vice Chair +; Adams, Cynthia D. RN, PhD, FAHA +; Bridges, Charles R. MD, ScD, FACC, FAHA [S]; Casey, Donald E. Jr MD, MPH, MBA, FACP, FAHA [//]; Ettinger, Steven M. MD, FACC +; Fesmire, Francis M. MD, FACEP [P]; Ganiats, Theodore G. MD #; Li…			2012 ACCF/AHA Focused Update of the Guideline for the Management of Patients With Unstable Angina/Non-ST-Elevation Myocardial Infarction (Updating the 2007 Guideline and Replacing the 2011 Focused Update): A Report of the American College of Cardiology Foundation/American Heart Association Task Force on Practice Guidelines.[Miscellaneous Article]	NA	NA	NA	NA	NA	NA	NA	NA	NA	NA	NA	NA	NA	NA	NA	NA	NA	NA	NA	NA	NA	NA	NA	Journals@Ovid Full Text	00003017-201208140-00016.	2012 Writing Committee Members *; Jneid, Hani MD, FACC, FAHA; Chair +; Anderson, Jeffrey L. MD, FACC, FAHA; Vice Chair +,++; Wright, R. Scott MD, FACC, FAHA; Vice Chair +; Adams, Cynthia D. RN, PhD, FAHA +; Bridges, Charles R. MD, ScD, FACC, FAHA [S]; Casey, Donald E. Jr MD, MPH, MBA, FACP, FAHA [//]; Ettinger, Steven M. MD, FACC +; Fesmire, Francis M. MD, FACEP [P]; Ganiats, Theodore G. MD #; Li…	2012 ACCF/AHA Focused Update of the Guideline for the Management of Patients With Unstable Angina/Non-ST-Elevation Myocardial Infarction (Updating the 2007 Guideline and Replacing the 2011 Focused Update): A Report of the American College of Cardiology Foundation/American Heart Association Task Force on Practice Guidelines.[Miscellaneous Article]	Circulation. 126(7):875-910, August 14, 2012.	NA	ACCF/AHA Focused Update.
NA	NA	NA	NA	NA	NA	NA	NA	NA	NA	NA	NA	NA	NA	NA	Ovid	A'Campo, L. E. I. 1; Wekking, E. M. 2; Spliethoff-Kamminga, N. G. A. 1; Stijnen, T. 3; Roos, R. A. C. 1			Treatment effect modifiers for the patient education programme for Parkinson's disease.[Article]	NA	NA	NA	NA	NA	NA	NA	NA	NA	NA	NA	NA	NA	NA	NA	NA	NA	NA	NA	NA	NA	NA	NA	Journals@Ovid Full Text	00066764-201201000-00014.	A'Campo, L. E. I. 1; Wekking, E. M. 2; Spliethoff-Kamminga, N. G. A. 1; Stijnen, T. 3; Roos, R. A. C. 1	Treatment effect modifiers for the patient education programme for Parkinson's disease.[Article]	International Journal of Clinical Practice. 66(1):77-83, January 2012.	NA	ORIGINAL PAPER: Neurology.
NA	NA	NA	NA	NA	NA	NA	NA	NA	NA	NA	NA	NA	NA	NA	AdditionalRecords	A FORM-VERSION	NA	NA	NHS CONNECTING FOR HEALTH EVALUATION PROGRAMME	NA	NA	NA	NA	NA	NA	NA	NA	NA	NA	NA	NA	NA	NA	NA	NA	NA	NA	NA	NA	NA	NA	NA	NA	NA	A FORM-VERSION	NHS CONNECTING FOR HEALTH EVALUATION PROGRAMME		NA	NA
NA	S. A.	Age-related changes in cortical porosity of the midshaft of the human femur	NA	NA	NA	NA	NA	NA	NA	NA	NA	NA	NA	NA	NCBI	A., S.			Age-related changes in cortical porosity of the midshaft of the human femur	NA	NA	NA	NA	NA	NA	NA	NA	NA	NA	NA	NA	NA	NA	NA	NA	NA	NA	NA	NA	FEIK, C. D. L.	NA	A., S.	NA	NA	NA	NA	NA	NA	NA
NA	Peter Aaby, Christine Benn, Jens Nielsen, Ida Maria Lisse, Amabelia Rodrigues, Henrik Ravn	Testing the hypothesis that diphtheria???tetanus???pertussis vaccine has negative non-specific and sex-differential effects on child survival in high-mortality countries	NA	NA	NA	NA	NA	NA	NA	NA	NA	NA	NA	NA	NCBI	Aaby, Peter; Benn, Christine; Nielsen, Jens; Lisse, Ida Maria; Rodrigues, Amabelia; Ravn, Henrik			Testing the hypothesis that diphtheria???tetanus???pertussis vaccine has negative non-specific and sex-differential effects on child survival in high-mortality countries	NA	NA	NA	NA	NA	NA	NA	NA	NA	NA	NA	NA	NA	NA	NA	NA	NA	NA	NA	NA	BMJ Open. 2012; 2(3): e000707. Published online 2012 May 22. doi:??10.1136/bmjopen-2011-000707	PMC3364456	Aaby, Peter; Benn, Christine; Nielsen, Jens; Lisse, Ida Maria; Rodrigues, Amabelia; Ravn, Henrik	NA	NA	NA	NA	NA	NA	NA
NA	Leif Edvard Aar??, Catherine Mathews, Sylvia Kaaya, Anne Ruhweza Katahoire, Hans Onya, Charles Abraham, Knut-Inge Klepp, Annegreet Wubs, Sander Matthijs Eggers, Hein de Vries	Promoting sexual and reproductive health among adolescents in southern and eastern Africa (PREPARE): project design and conceptual framework	NA	NA	NA	NA	NA	NA	NA	NA	NA	NA	NA	NA	NCBI	Aar??, Leif Edvard; Mathews, Catherine; Kaaya, Sylvia; Katahoire, Anne Ruhweza; Onya, Hans; Abraham, Charles; Klepp, Knut-Inge; Wubs, Annegreet; Eggers, Sander Matthijs; Vries, Hein de			Promoting sexual and reproductive health among adolescents in southern and eastern Africa (PREPARE): project design and conceptual framework	NA	NA	NA	NA	NA	NA	NA	NA	NA	NA	NA	NA	NA	NA	NA	NA	NA	NA	NA	NA	BMC Public Health. 2014; 14: 54. Published online 2014 January 18. doi:??10.1186/1471-2458-14-54	PMC3908968	Aar??, Leif Edvard; Mathews, Catherine; Kaaya, Sylvia; Katahoire, Anne Ruhweza; Onya, Hans; Abraham, Charles; Klepp, Knut-Inge; Wubs, Annegreet; Eggers, Sander Matthijs; Vries, Hein de	NA	NA	NA	NA	NA	NA	NA
NA	NA	NA	NA	NA	NA	NA	NA	NA	NA	NA	NA	NA	NA	NA	Ovid	Aaro L.E. Flisher A.J. Kaaya S. Onya H. Fuglesang M. Klepp K.-I. Schaalma H.			Promoting sexual and reproductive health in early adolescence in South Africa and Tanzania: Development of a theory- and evidence-based intervention programme.	NA	NA	NA	NA	NA	NA	NA	NA	NA	NA	NA	NA	NA	NA	NA	NA	NA	NA	NA	NA	NA	NA	NA	Embase	2006166934	Aaro L.E. Flisher A.J. Kaaya S. Onya H. Fuglesang M. Klepp K.-I. Schaalma H.	Promoting sexual and reproductive health in early adolescence in South Africa and Tanzania: Development of a theory- and evidence-based intervention programme.	Scandinavian Journal of Public Health. 34 (2) (pp 150-158), 2006. Date of Publication: April 2006.	NA	NA
NA	NA	NA	NA	NA	NA	NA	NA	NA	NA	NA	NA	NA	NA	NA	Ovid	Abbeddou S. Hess S.Y. Yakes E. Some W.J. Ouedraogo Z.P. Ouedraogo J.B. Brown K.H.			Supplementation with low-dose, lipid-based nutrient supplements increases iron reserves and hemoglobin, but not vitamin a status, of young burkinabe children.	NA	NA	NA	NA	NA	NA	NA	NA	NA	NA	NA	NA	NA	NA	NA	NA	NA	NA	NA	NA	NA	NA	NA	Embase	71179663	Abbeddou S. Hess S.Y. Yakes E. Some W.J. Ouedraogo Z.P. Ouedraogo J.B. Brown K.H.	Supplementation with low-dose, lipid-based nutrient supplements increases iron reserves and hemoglobin, but not vitamin a status, of young burkinabe children.	Annals of Nutrition and Metabolism. Conference: 20th International Congress of Nutrition Granada Spain. Conference Start: 20130915 Conference End: 20130920. Conference Publication: (var.pagings). 63 (pp 1032), 2013. Date of Publication: 2013.	NA	NA
NA	NA	NA	NA	NA	NA	NA	NA	NA	NA	NA	NA	NA	NA	NA	Ovid	ABBOTT, ALISON			Biomedicine: THE CHANGING FACE OF PRIMATE RESEARCH.[Miscellaneous]	NA	NA	NA	NA	NA	NA	NA	NA	NA	NA	NA	NA	NA	NA	NA	NA	NA	NA	NA	NA	NA	NA	NA	Journals@Ovid Full Text	00006056-201402060-00023.	ABBOTT, ALISON	Biomedicine: THE CHANGING FACE OF PRIMATE RESEARCH.[Miscellaneous]	Nature. 506(7486):24-26, February 6, 2014.	NA	NEWS: FEATURE.
NA	NA	NA	NA	NA	NA	NA	NA	NA	NA	NA	NA	NA	NA	NA	Ovid	Abbott, Stephen BA MA(Econ) CQSW 1; Hobby, Lindsay RN RM BSocSc(Hons) 2; Cotter, Sarah BSc PhD 3			What is the impact on individual health of services in general practice settings which offer welfare benefits advice?.[Article]	NA	NA	NA	NA	NA	NA	NA	NA	NA	NA	NA	NA	NA	NA	NA	NA	NA	NA	NA	NA	NA	NA	NA	Journals@Ovid Full Text	00021764-200601000-00001.	Abbott, Stephen BA MA(Econ) CQSW 1; Hobby, Lindsay RN RM BSocSc(Hons) 2; Cotter, Sarah BSc PhD 3	What is the impact on individual health of services in general practice settings which offer welfare benefits advice?.[Article]	Health & Social Care in the Community. 14(1):1-8, January 2006.	NA	Original paper.
NA	Alaa Abd-Elsayed, John P. Lawrence	Editorial - Can Distance Learning Improve the Quality of Medical Education?	NA	NA	NA	NA	NA	NA	NA	NA	NA	NA	NA	NA	NCBI	Abd-Elsayed, Alaa; Lawrence, John P.			Editorial - Can Distance Learning Improve the Quality of Medical Education?	NA	NA	NA	NA	NA	NA	NA	NA	NA	NA	NA	NA	NA	NA	NA	NA	NA	NA	NA	NA	Ochsner J. 2013 Fall; 13(3): 298.	PMC3776502	Abd-Elsayed, Alaa; Lawrence, John P.	NA	NA	NA	NA	NA	NA	NA
NA	Abdel-Wahed, N; Ahmed, AWS; Elabedeen, AZ; Gadallah, SM; Solouma, NH; Kadah, YM	Computer assisted radiographic characterization of alloimplant materials used as bone substitutes in dentistry	MEDICAL IMAGING 2003: IMAGE PROCESSING, PTS 1-3	NA	NA	NA	NA	NA	NA	NA	90	NA	NA	NA	WebOfKnowledge	Abdel-Wahed, N; Ahmed, AWS; Elabedeen, AZ; Gadallah, SM; Solouma, NH; Kadah, YM			Computer assisted radiographic characterization of alloimplant materials used as bone substitutes in dentistry	NA	NA	NA	NA	NA		SPIE; Amer Assoc Phys Med; Amer Physiol Soc; Ctr Devices & Radiol Hlth; Soc Imaging Sci & Technol; Natl Elect Mfg Assoc, Diagnost Imaging & Therapy Syst Div; Radiol Soc N Amer; Soc Comp Appl Radiol	227	NA	FEB 17-20, 2003	NA	0277-786X	NA	NA	NA	NA	NA	NA	NA	NA	NA	NA	NA	NA	NA	NA	NA	NA	NA	NA
NA	Amir Abdulmawjood, Holger Sch??nenbr?Ýcher, Michael B?Ýlte	Novel Molecular Method for Detection of Bovine-Specific Central Nervous System Tissues as Bovine Spongiform Encephalopathy Risk Material in Meat and Meat Products	NA	NA	NA	NA	NA	NA	NA	NA	NA	NA	NA	NA	NCBI	Abdulmawjood, Amir; Sch??nenbr?Ýcher, Holger; B?Ýlte, Michael			Novel Molecular Method for Detection of Bovine-Specific Central Nervous System Tissues as Bovine Spongiform Encephalopathy Risk Material in Meat and Meat Products	NA	NA	NA	NA	NA	NA	NA	NA	NA	NA	NA	NA	NA	NA	NA	NA	NA	NA	NA	NA	J Mol Diagn. 2005 August; 7(3): 368???374. doi:??10.1016/S1525-1578(10)60566-1	PMC1867545	Abdulmawjood, Amir; Sch??nenbr?Ýcher, Holger; B?Ýlte, Michael	NA	NA	NA	NA	NA	NA	NA
NA	NA	NA	NA	NA	NA	NA	NA	NA	NA	NA	NA	NA	NA	NA	Ovid	Abe, Hiroaki RPT, MSc; Kondo, Takeo MD, PhD; Oouchida, Yutaka PhD; Suzukamo, Yoshimi PhD; Fujiwara, Satoru MD, PhD; Izumi, Shin-Ichi MD, PhD			Prevalence and Length of Recovery of Pusher Syndrome Based on Cerebral Hemispheric Lesion Side in Patients With Acute Stroke.[Report]	NA	NA	NA	NA	NA	NA	NA	NA	NA	NA	NA	NA	NA	NA	NA	NA	NA	NA	NA	NA	NA	NA	NA	Journals@Ovid Full Text	00007670-201206000-00035.	Abe, Hiroaki RPT, MSc; Kondo, Takeo MD, PhD; Oouchida, Yutaka PhD; Suzukamo, Yoshimi PhD; Fujiwara, Satoru MD, PhD; Izumi, Shin-Ichi MD, PhD	Prevalence and Length of Recovery of Pusher Syndrome Based on Cerebral Hemispheric Lesion Side in Patients With Acute Stroke.[Report]	Stroke. 43(6):1654-1656, June 2012.	NA	Original Contributions; Brief Reports.
NA	Abe, Shinji; Imada, Ryou; Terauchi, Takashi; Fujisaki, Tatsuya; Monma, Masahiko; Nishimura, Katsuyuki; Saitoh, Hidetoshi; Mochizuki, Yasuo	[Sensitometry of Mammographic Screen-film System Using Bootstrap Aluminum Step-Wedge.].	Igaku butsuri : Nihon Igaku Butsuri Gakkai kikanshi = Japanese journal of medical physics : an official journal of Japan Society of Medical Physics	NA	NA	NA	NA	NA	NA	NA	49	NA	16479054	NA	WebOfKnowledge	Abe, Shinji; Imada, Ryou; Terauchi, Takashi; Fujisaki, Tatsuya; Monma, Masahiko; Nishimura, Katsuyuki; Saitoh, Hidetoshi; Mochizuki, Yasuo			[Sensitometry of Mammographic Screen-film System Using Bootstrap Aluminum Step-Wedge.].	NA	NA	NA	NA	NA	4		720	NA		NA	1345-5354	NA	NA	NA	NA	NA	NA	NA	NA	NA	NA	NA	NA	NA	NA	NA	NA	NA	NA
NA	NA	NA	NA	NA	NA	NA	NA	NA	NA	NA	NA	NA	NA	NA	Ovid	Abebe, Yigeremu; Schaap, Ab a; Mamo, Girmatchew; Negussie, Asheber; Darimo, Birke; Wolday, Dawit a			HIV prevalence in 72 000 urban and rural male army recruits, Ethiopia.[Miscellaneous Article]	NA	NA	NA	NA	NA	NA	NA	NA	NA	NA	NA	NA	NA	NA	NA	NA	NA	NA	NA	NA	NA	NA	NA	Journals@Ovid Full Text	00002030-200308150-00013.	Abebe, Yigeremu; Schaap, Ab a; Mamo, Girmatchew; Negussie, Asheber; Darimo, Birke; Wolday, Dawit a	HIV prevalence in 72 000 urban and rural male army recruits, Ethiopia.[Miscellaneous Article]	AIDS. 17(12):1835-1840, August 15, 2003.	NA	EPIDEMIOLOGY & SOCIAL: CONCISE COMMUNICATIONS.
NA	NA	NA	NA	NA	NA	NA	NA	NA	NA	NA	NA	NA	NA	NA	Ovid	Abela, Noel MSc; Borg, Michael A. PhD &lowast;			Impact on hand hygiene compliance following migration to a new hospital with improved resources and the sequential introduction of World Health Organization recommendations.[Article]	NA	NA	NA	NA	NA	NA	NA	NA	NA	NA	NA	NA	NA	NA	NA	NA	NA	NA	NA	NA	NA	NA	NA	Journals@Ovid Full Text	00000545-201210000-00013.	Abela, Noel MSc; Borg, Michael A. PhD &lowast;	Impact on hand hygiene compliance following migration to a new hospital with improved resources and the sequential introduction of World Health Organization recommendations.[Article]	AJIC: American Journal of Infection Control. 40(8):737-741, October 2012.	NA	Major article.
NA	J. Pablo Abonia, Jenny Hallgren, Tatiana Jones, Tong Shi, Yuhui Xu, Pandelakis Koni, Richard A. Flavell, Joshua A. Boyce, K. Frank Austen, Michael F. Gurish	Alpha-4 integrins and VCAM-1, but not MAdCAM-1, are essential for recruitment of mast cell progenitors to the inflamed lung	NA	NA	NA	NA	NA	NA	NA	NA	NA	NA	NA	NA	NCBI	Abonia, J. Pablo; Hallgren, Jenny; Jones, Tatiana; Shi, Tong; Xu, Yuhui; Koni, Pandelakis; Flavell, Richard A.; Boyce, Joshua A.; Austen, K. Frank; Gurish, Michael F.			Alpha-4 integrins and VCAM-1, but not MAdCAM-1, are essential for recruitment of mast cell progenitors to the inflamed lung	NA	NA	NA	NA	NA	NA	NA	NA	NA	NA	NA	NA	NA	NA	NA	NA	NA	NA	NA	NA	Blood. 2006 September 1; 108(5): 1588???1594. Prepublished online 2006 May 2. doi:??10.1182/blood-2005-12-012781	PMC1895513	Abonia, J. Pablo; Hallgren, Jenny; Jones, Tatiana; Shi, Tong; Xu, Yuhui; Koni, Pandelakis; Flavell, Richard A.; Boyce, Joshua A.; Austen, K. Frank; Gurish, Michael F.	NA	NA	NA	NA	NA	NA	NA
NA	NA	NA	NA	NA	NA	NA	NA	NA	NA	NA	NA	NA	NA	NA	Ovid	Abood, Sheila MS, RN			The Bush Regulatory Agenda: Federal review reshapes Clinton initiatives.[Miscellaneous]	NA	NA	NA	NA	NA	NA	NA	NA	NA	NA	NA	NA	NA	NA	NA	NA	NA	NA	NA	NA	NA	NA	NA	Journals@Ovid Full Text	00000446-200108000-00013.	Abood, Sheila MS, RN	The Bush Regulatory Agenda: Federal review reshapes Clinton initiatives.[Miscellaneous]	AJN, American Journal of Nursing. 101(8):22, August 2001.	NA	Departments: From the ANA: Washington Watch.
NA	NA	NA	NA	NA	NA	NA	NA	NA	NA	NA	NA	NA	NA	NA	Ovid	Abou-Ayache, Ramzi 1; Buchler, Mathias 2; Lepogamp, Patrick 3; Westeel, Pierre-Francois 4; le Meur, Yannick 5; Etienne, Isabelle 6; Lobbedez, Thierry 7; Toupance, Olivier 8; Caillard, Sophie 9; Goujon, Jean-Michel 10; Bergougnoux, Loic 11; Touchard, Guy 1			CMV infections after two doses of daclizumab versus thymoglobulin in renal transplant patients receiving mycophenolate mofetil, steroids and delayed cyclosporine A.[Article]	NA	NA	NA	NA	NA	NA	NA	NA	NA	NA	NA	NA	NA	NA	NA	NA	NA	NA	NA	NA	NA	NA	NA	Journals@Ovid Full Text	00005884-200806000-00041.	Abou-Ayache, Ramzi 1; Buchler, Mathias 2; Lepogamp, Patrick 3; Westeel, Pierre-Francois 4; le Meur, Yannick 5; Etienne, Isabelle 6; Lobbedez, Thierry 7; Toupance, Olivier 8; Caillard, Sophie 9; Goujon, Jean-Michel 10; Bergougnoux, Loic 11; Touchard, Guy 1	CMV infections after two doses of daclizumab versus thymoglobulin in renal transplant patients receiving mycophenolate mofetil, steroids and delayed cyclosporine A.[Article]	Nephrology Dialysis Transplantation. 23(6):2024-2032, June 2008.	NA	ORIGINAL ARTICLE: DIALYSIS AND TRANSPLANTATION.
NA	Abou Youssif, T.; Tanguay, S.	Natural history and management of small renal masses	CURRENT ONCOLOGY	NA	NA	NA	NA	NA	NA	NA	43	NA	NA	NA	WebOfKnowledge	Abou Youssif, T.; Tanguay, S.			Natural history and management of small renal masses	NA	NA	NA	NA	NA			937	NA		NA	1198-0052	NA	NA	NA	NA	NA	NA	NA	NA	NA	NA	NA	NA	NA	NA	NA	NA	NA	NA
NA	Abouassaly, Robert; Lane, Brian R.; Jones, J. Stephen	Staging saturation biopsy in patients with prostate cancer on active surveillance protocol	UROLOGY	NA	NA	NA	NA	NA	NA	NA	132	NA	18387385	NA	WebOfKnowledge	Abouassaly, Robert; Lane, Brian R.; Jones, J. Stephen			Staging saturation biopsy in patients with prostate cancer on active surveillance protocol	NA	NA	NA	NA	NA	4		630	NA		NA	0090-4295	NA	NA	NA	NA	NA	NA	NA	NA	NA	NA	NA	NA	NA	NA	NA	NA	NA	NA
NA	Abrahamsson, Per-Anders	Active surveillance vs radical prostatectomy	BJU INTERNATIONAL	NA	NA	NA	NA	NA	NA	NA	6	NA	17594354	NA	WebOfKnowledge	Abrahamsson, Per-Anders			Active surveillance vs radical prostatectomy	NA	NA	NA	NA	NA			376	NA		NA	1464-4096	NA	NA	NA	NA	NA	NA	NA	NA	NA	NA	NA	NA	NA	NA	NA	NA	NA	NA
NA	Abrahamsson, Per-Anders	Prostate cancer and active surveillance	CONTROVERSIES IN THE TREATMENT OF PROSTATE CANCER	NA	NA	NA	NA	NA	NA	NA	101	NA	18544979	NA	WebOfKnowledge	Abrahamsson, Per-Anders			Prostate cancer and active surveillance	NA	NA	NA	NA	NA			645	NA	SEP 02-08, 2006	NA	0071-9676	NA	NA	NA	NA	NA	NA	NA	NA	NA	NA	NA	NA	NA	NA	NA	NA	NA	NA
NA	Abrahamsson, Per-Anders	Prostate Cancer: To Treat or Not to Treat?	EUROPEAN UROLOGY SUPPLEMENTS	NA	NA	NA	NA	NA	NA	NA	139	NA	NA	NA	WebOfKnowledge	Abrahamsson, Per-Anders			Prostate Cancer: To Treat or Not to Treat?	NA	NA	NA	NA	NA	5		525	NA		NA	1569-9056	NA	NA	NA	NA	NA	NA	NA	NA	NA	NA	NA	NA	NA	NA	NA	NA	NA	NA
NA	NA	NA	NA	NA	NA	NA	NA	NA	NA	NA	NA	NA	NA	NA	Ovid	Abramowicz, Daniel MD, PhD; Wissing, K Martin MD; Broeders, Nilufer MD			Induction with anti-CD3 antibodies.[Miscellaneous]	NA	NA	NA	NA	NA	NA	NA	NA	NA	NA	NA	NA	NA	NA	NA	NA	NA	NA	NA	NA	NA	NA	NA	Journals@Ovid Full Text	00075200-199912000-00003.	Abramowicz, Daniel MD, PhD; Wissing, K Martin MD; Broeders, Nilufer MD	Induction with anti-CD3 antibodies.[Miscellaneous]	Current Opinion in Organ Transplantation. 4(4):312, December 1999.	NA	Renal Transplantation.
NA	Elissa Michele Abrams, Allan B. Becker	Introducing solid food: Age of introduction and its effect on risk of food allergy and other atopic diseases	NA	NA	NA	NA	NA	NA	NA	NA	NA	NA	NA	NA	NCBI	Abrams, Elissa Michele; Becker, Allan B.			Introducing solid food: Age of introduction and its effect on risk of food allergy and other atopic diseases	NA	NA	NA	NA	NA	NA	NA	NA	NA	NA	NA	NA	NA	NA	NA	NA	NA	NA	NA	NA	Can Fam Physician. 2013 July; 59(7): 721-722. Cet article est disponible en fran??ais: Can Fam Physician. 2013 juillet; 59(7): e298-e299.	PMC3710027	Abrams, Elissa Michele; Becker, Allan B.	NA	NA	NA	NA	NA	NA	NA
NA	NA	NA	NA	NA	NA	NA	NA	NA	NA	NA	NA	NA	NA	NA	Ovid	Abrams, Paul.			Fortnightly Review: Managing Lower Urinary Tract Symptoms in Older Men.[Miscellaneous Article]	NA	NA	NA	NA	NA	NA	NA	NA	NA	NA	NA	NA	NA	NA	NA	NA	NA	NA	NA	NA	NA	NA	NA	Journals@Ovid Full Text	00002591-199504290-00013.	Abrams, Paul.	Fortnightly Review: Managing Lower Urinary Tract Symptoms in Older Men.[Miscellaneous Article]	BMJ. 310(6987):1113-1117, April 29, 1995.	NA	Education & Debate.
NA	Emily M. Abramsohn, Carole Decker, Brian Garavalia, Linda Garavalia, Kensey Gosch, Harlan M. Krumholz, John A. Spertus, Stacy Tessler Lindau	???I'm Not Just a Heart, I'm a Whole Person Here??: A Qualitative Study to Improve Sexual Outcomes in Women With Myocardial Infarction	NA	NA	NA	NA	NA	NA	NA	NA	NA	NA	NA	NA	NCBI	Abramsohn, Emily M.; Decker, Carole; Garavalia, Brian; Garavalia, Linda; Gosch, Kensey; Krumholz, Harlan M.; Spertus, John A.; Lindau, Stacy Tessler			???I'm Not Just a Heart, I'm a Whole Person Here??: A Qualitative Study to Improve Sexual Outcomes in Women With Myocardial Infarction	NA	NA	NA	NA	NA	NA	NA	NA	NA	NA	NA	NA	NA	NA	NA	NA	NA	NA	NA	NA	J Am Heart Assoc. 2013 August; 2(4): e000199. Published online 2013 August 23. doi:??10.1161/JAHA.113.000199	PMC3828784	Abramsohn, Emily M.; Decker, Carole; Garavalia, Brian; Garavalia, Linda; Gosch, Kensey; Krumholz, Harlan M.; Spertus, John A.; Lindau, Stacy Tessler	NA	NA	NA	NA	NA	NA	NA
NA	NA	NA	NA	NA	NA	NA	NA	NA	NA	NA	NA	NA	NA	NA	Ovid	ABREU, SIDNEY C.; GOLDFARB, DAVID A. *; DERWEESH, ITHAAR; THORNTON, JULIE; URBAIN, JEAN L.; MASCHA, EDWARD; STEINBERG, ANDREW P.; KAOUK, JIHAD H.; FLECHNER, STUART; MODLIN, CHARLES; KRISHNAMURTHI, VENKATESH; NOVICK, ANDREW C.; GILL, INDERBIR S.			Factors Related to Delayed Graft Function After Laparoscopic Live Donor Nephrectomy.[Article]	NA	NA	NA	NA	NA	NA	NA	NA	NA	NA	NA	NA	NA	NA	NA	NA	NA	NA	NA	NA	NA	NA	NA	Journals@Ovid Full Text	00005392-200401000-00013.	ABREU, SIDNEY C.; GOLDFARB, DAVID A. *; DERWEESH, ITHAAR; THORNTON, JULIE; URBAIN, JEAN L.; MASCHA, EDWARD; STEINBERG, ANDREW P.; KAOUK, JIHAD H.; FLECHNER, STUART; MODLIN, CHARLES; KRISHNAMURTHI, VENKATESH; NOVICK, ANDREW C.; GILL, INDERBIR S.	Factors Related to Delayed Graft Function After Laparoscopic Live Donor Nephrectomy.[Article]	Journal of Urology. 171(1):52-57, January 2004.	NA	CLINICAL UROLOGY: Original Articles.
NA	Alireza Abrishami, Abbas Bagheri, Hossein Salour, Maryam Aletaha, Shahin Yazdani	Outcomes of Levator Resection at Tertiary Eye Care Center in Iran: A 10-Year Experience	NA	NA	NA	NA	NA	NA	NA	NA	NA	NA	NA	NA	NCBI	Abrishami, Alireza; Bagheri, Abbas; Salour, Hossein; Aletaha, Maryam; Yazdani, Shahin			Outcomes of Levator Resection at Tertiary Eye Care Center in Iran: A 10-Year Experience	NA	NA	NA	NA	NA	NA	NA	NA	NA	NA	NA	NA	NA	NA	NA	NA	NA	NA	NA	NA	Korean J Ophthalmol. 2012 February; 26(1): 1???5. Published online 2012 January 14. doi:??10.3341/kjo.2012.26.1.1	PMC3268161	Abrishami, Alireza; Bagheri, Abbas; Salour, Hossein; Aletaha, Maryam; Yazdani, Shahin	NA	NA	NA	NA	NA	NA	NA
NA	Laith J. Abu-Raddad, Lorenzo Sabatelli, Jerusha T. Achterberg, Jonathan D. Sugimoto, Ira M. Longini, Jr., Christopher Dye, M. Elizabeth Halloran	Epidemiological benefits of more-effective tuberculosis vaccines, drugs, and diagnostics	NA	NA	NA	NA	NA	NA	NA	NA	NA	NA	NA	NA	NCBI	Abu-Raddad, Laith J.; Sabatelli, Lorenzo; Achterberg, Jerusha T.; Sugimoto, Jonathan D.; Longini, Ira M.; Jr.; Dye, Christopher; Halloran, M. Elizabeth			Epidemiological benefits of more-effective tuberculosis vaccines, drugs, and diagnostics	NA	NA	NA	NA	NA	NA	NA	NA	NA	NA	NA	NA	NA	NA	NA	NA	NA	NA	NA	NA	Proc Natl Acad Sci U S A. 2009 August 18; 106(33): 13980???13985. Published online 2009 August 3. doi:??10.1073/pnas.0901720106	PMC2720405	Abu-Raddad, Laith J.; Sabatelli, Lorenzo; Achterberg, Jerusha T.; Sugimoto, Jonathan D.; Longini, Ira M.; Jr.; Dye, Christopher; Halloran, M. Elizabeth	NA	NA	NA	NA	NA	NA	NA
NA	NA	NA	NA	NA	NA	NA	NA	NA	NA	NA	NA	NA	NA	NA	ISRCTN	Abubakar, Ibrahim	NA	NA	Evaluation of resources to promote human immunodeficiency virus (HIV) testing in tuberculosis (TB) clinics	NA	NA	NA	NA	NA	NA	NA	NA	NA	NA	NA	NA	NA	NA	NA	NA	NA	NA	NA	NA	NA	NA	NA	NA	NA	NA	Evaluation of resources to promote human immunodeficiency virus (HIV) testing in tuberculosis (TB) clinics	NA	NA	NA
NA	Timothy O Abuya, Wilfred Mutemi, Baya Karisa, Sam A Ochola, Greg Fegan, Vicki Marsh	Use of over-the-counter malaria medicines in children and adults in three districts in Kenya: implications for private medicine retailer interventions	NA	NA	NA	NA	NA	NA	NA	NA	NA	NA	NA	NA	NCBI	Abuya, Timothy O; Mutemi, Wilfred; Karisa, Baya; Ochola, Sam A; Fegan, Greg; Marsh, Vicki			Use of over-the-counter malaria medicines in children and adults in three districts in Kenya: implications for private medicine retailer interventions	NA	NA	NA	NA	NA	NA	NA	NA	NA	NA	NA	NA	NA	NA	NA	NA	NA	NA	NA	NA	Malar J. 2007; 6: 57. Published online 2007 May 10. doi:??10.1186/1475-2875-6-57	PMC1872028	Abuya, Timothy O; Mutemi, Wilfred; Karisa, Baya; Ochola, Sam A; Fegan, Greg; Marsh, Vicki	NA	NA	NA	NA	NA	NA	NA
NA	Timothy Abuya, Abdinasir Amin, Sassy Molyneux, Willis Akhwale, Vicki Marsh, Lucy Gilson	Importance of strategic management in the implementation of private medicine retailer programmes: case studies from three districts in Kenya	NA	NA	NA	NA	NA	NA	NA	NA	NA	NA	NA	NA	NCBI	Abuya, Timothy; Amin, Abdinasir; Molyneux, Sassy; Akhwale, Willis; Marsh, Vicki; Gilson, Lucy			Importance of strategic management in the implementation of private medicine retailer programmes: case studies from three districts in Kenya	NA	NA	NA	NA	NA	NA	NA	NA	NA	NA	NA	NA	NA	NA	NA	NA	NA	NA	NA	NA	BMC Health Serv Res. 2010; 10(Suppl 1): S7. Published online 2010 July 2. doi:??10.1186/1472-6963-10-S1-S7	PMC2895751	Abuya, Timothy; Amin, Abdinasir; Molyneux, Sassy; Akhwale, Willis; Marsh, Vicki; Gilson, Lucy	NA	NA	NA	NA	NA	NA	NA
NA	Timothy Abuya, Rebecca Njuki, Charlotte E Warren, Jerry Okal, Francis Obare, Lucy Kanya, Ian Askew, Ben Bellows	A Policy Analysis of the implementation of a Reproductive Health Vouchers Program in Kenya	NA	NA	NA	NA	NA	NA	NA	NA	NA	NA	NA	NA	NCBI	Abuya, Timothy; Njuki, Rebecca; Warren, Charlotte E; Okal, Jerry; Obare, Francis; Kanya, Lucy; Askew, Ian; Bellows, Ben			A Policy Analysis of the implementation of a Reproductive Health Vouchers Program in Kenya	NA	NA	NA	NA	NA	NA	NA	NA	NA	NA	NA	NA	NA	NA	NA	NA	NA	NA	NA	NA	BMC Public Health. 2012; 12: 540. Published online 2012 July 23. doi:??10.1186/1471-2458-12-540	PMC3490771	Abuya, Timothy; Njuki, Rebecca; Warren, Charlotte E; Okal, Jerry; Obare, Francis; Kanya, Lucy; Askew, Ian; Bellows, Ben	NA	NA	NA	NA	NA	NA	NA
NA	NA	NA	NA	NA	NA	NA	NA	NA	NA	NA	NA	NA	NA	NA	Ovid	Acierno, Stephanie P. MD; Jurkovich, Gregory J. MD; Nathens, Avery B. MD, MPH			Is Pediatric Trauma Still a Surgical Disease? Patterns of Emergent Operative Intervention in the Injured Child.[Article]	NA	NA	NA	NA	NA	NA	NA	NA	NA	NA	NA	NA	NA	NA	NA	NA	NA	NA	NA	NA	NA	NA	NA	Journals@Ovid Full Text	00005373-200405000-00005.	Acierno, Stephanie P. MD; Jurkovich, Gregory J. MD; Nathens, Avery B. MD, MPH	Is Pediatric Trauma Still a Surgical Disease? Patterns of Emergent Operative Intervention in the Injured Child.[Article]	Journal of Trauma-Injury Infection & Critical Care. 56(5):960-966, May 2004.	NA	ORIGINAL ARTICLES.
NA	NA	NA	NA	NA	NA	NA	NA	NA	NA	NA	NA	NA	NA	NA	Ovid	Adair A. Hamid R. Bathgate A. Powell J.J.			Induction therapy with basiliximab and delayed introduction of tacrolimus is associated with a reduced requirement for post-operative renal replacement therapy in high-risk patients undergoing orthotopic liver transplantation (OLT).	NA	NA	NA	NA	NA	NA	NA	NA	NA	NA	NA	NA	NA	NA	NA	NA	NA	NA	NA	NA	NA	NA	NA	Embase	70527782	Adair A. Hamid R. Bathgate A. Powell J.J.	Induction therapy with basiliximab and delayed introduction of tacrolimus is associated with a reduced requirement for post-operative renal replacement therapy in high-risk patients undergoing orthotopic liver transplantation (OLT).	Transplant International. Conference: 15th Congress of the European Society for Organ Transplantation, ESOT and 22nd Annual Conference of the British Society for Histocompatibility and Immunogenetics, BSHI Glasgow United Kingdom. Conference Start: 20110904 Conference End: 20110907. Conference Publication: (var.pagings). 24 (pp 198), 2011. Date of Publication: September 2011.	NA	NA
NA	NA	NA	NA	NA	NA	NA	NA	NA	NA	NA	NA	NA	NA	NA	Ovid	Adam H.M. Stern E.K. Stein R.E.K.			Anticipatory guidance: A modest invervention in the nursery.	NA	NA	NA	NA	NA	NA	NA	NA	NA	NA	NA	NA	NA	NA	NA	NA	NA	NA	NA	NA	NA	NA	NA	Embase	1986009067	Adam H.M. Stern E.K. Stein R.E.K.	Anticipatory guidance: A modest invervention in the nursery.	Pediatrics. 76 (5) (pp 781-786), 1985. Date of Publication: 1985.	NA	NA
NA	NA	NA	NA	NA	NA	NA	NA	NA	NA	NA	NA	NA	NA	NA	Ovid	Adamec, Robert *; Hebert, Mark; Blundell, Jacqueline			Long lasting effects of predator stress on pCREB expression in brain regions involved in fearful and anxious behavior.[Report]	NA	NA	NA	NA	NA	NA	NA	NA	NA	NA	NA	NA	NA	NA	NA	NA	NA	NA	NA	NA	NA	NA	NA	Journals@Ovid Full Text	00078402-201108010-00016.	Adamec, Robert *; Hebert, Mark; Blundell, Jacqueline	Long lasting effects of predator stress on pCREB expression in brain regions involved in fearful and anxious behavior.[Report]	Behavioural Brain Research. 221(1):118-133, August 2011.	NA	Research report.
NA	NA	NA	NA	NA	NA	NA	NA	NA	NA	NA	NA	NA	NA	NA	Ovid	Adamec, Robert E *; Blundell, Jacqueline; Burton, Paul			Phosphorylated cyclic AMP response element binding protein expression induced in the periaqueductal gray by predator stress: its relationship to the stress experience, behavior and limbic neural plasticity.[Article]	NA	NA	NA	NA	NA	NA	NA	NA	NA	NA	NA	NA	NA	NA	NA	NA	NA	NA	NA	NA	NA	NA	NA	Journals@Ovid Full Text	00079304-200312000-00008.	Adamec, Robert E *; Blundell, Jacqueline; Burton, Paul	Phosphorylated cyclic AMP response element binding protein expression induced in the periaqueductal gray by predator stress: its relationship to the stress experience, behavior and limbic neural plasticity.[Article]	Progress in Neuro-Psychopharmacology & Biological Psychiatry. 27(8):1243-1267, December 2003.	NA	Article.
NA	NA	NA	NA	NA	NA	NA	NA	NA	NA	NA	NA	NA	NA	NA	Ovid	Adamec, Robert E. *; Blundell, Jacqueline; Burton, Paul			Relationship of the predatory attack experience to neural plasticity, pCREB expression and neuroendocrine response.[Review]	NA	NA	NA	NA	NA	NA	NA	NA	NA	NA	NA	NA	NA	NA	NA	NA	NA	NA	NA	NA	NA	NA	NA	Journals@Ovid Full Text	00006211-200630030-00007.	Adamec, Robert E. *; Blundell, Jacqueline; Burton, Paul	Relationship of the predatory attack experience to neural plasticity, pCREB expression and neuroendocrine response.[Review]	Neuroscience & Biobehavioral Reviews. 30(3):356-375, 2006.	NA	Review.
NA	Robert Adamec, Olivier Berton, Waleed Abdul Razek	Viral Vector Induction of CREB Expression in the Periaqueductal Gray Induces a Predator Stress-Like Pattern of Changes in pCREB Expression, Neuroplasticity, and Anxiety in Rodents	NA	NA	NA	NA	NA	NA	NA	NA	NA	NA	NA	NA	NCBI	Adamec, Robert; Berton, Olivier; Razek, Waleed Abdul			Viral Vector Induction of CREB Expression in the Periaqueductal Gray Induces a Predator Stress-Like Pattern of Changes in pCREB Expression, Neuroplasticity, and Anxiety in Rodents	NA	NA	NA	NA	NA	NA	NA	NA	NA	NA	NA	NA	NA	NA	NA	NA	NA	NA	NA	NA	Neural Plast. 2009; 2009: 904568. Published online 2009 April 1. doi:??10.1155/2009/904568	PMC2664642	Adamec, Robert; Berton, Olivier; Razek, Waleed Abdul	NA	NA	NA	NA	NA	NA	NA
NA	NA	NA	NA	NA	NA	NA	NA	NA	NA	NA	NA	NA	NA	NA	Ovid	Adamkin, David H. MD			Pragmatic Approach to In-Hospital Nutrition in High-Risk Neonates.[Article]	NA	NA	NA	NA	NA	NA	NA	NA	NA	NA	NA	NA	NA	NA	NA	NA	NA	NA	NA	NA	NA	NA	NA	Journals@Ovid Full Text	00005120-200505002-00003.	Adamkin, David H. MD	Pragmatic Approach to In-Hospital Nutrition in High-Risk Neonates.[Article]	Journal of Perinatology. 25 (Supplement 2):S7-S11, May 2005.	NA	Evidence vs Experience in Neonatal Practice: Proceedings from the Inaugural Conference; (October 8-9, 2004): Original Article.
NA	NA	NA	NA	NA	NA	NA	NA	NA	NA	NA	NA	NA	NA	NA	Ovid	Adams, E J 1; LaMontagne, D S 2; Johnston, A R 3 *; Pimenta, J M; Fenton, K A 2; Edmunds, W J 1			Modelling the healthcare costs of an opportunistic chlamydia screening programme.[Article]	NA	NA	NA	NA	NA	NA	NA	NA	NA	NA	NA	NA	NA	NA	NA	NA	NA	NA	NA	NA	NA	NA	NA	Journals@Ovid Full Text	00115314-200410000-00009.	Adams, E J 1; LaMontagne, D S 2; Johnston, A R 3 *; Pimenta, J M; Fenton, K A 2; Edmunds, W J 1	Modelling the healthcare costs of an opportunistic chlamydia screening programme.[Article]	Sexually Transmitted Infections. 80(5):363-370, October 2004.	NA	ORIGINAL ARTICLE.
NA	NA	NA	NA	NA	NA	NA	NA	NA	NA	NA	NA	NA	NA	NA	Ovid	Adams, J 1; Hennessy-Priest, K 2; Ingimarsdottir, S 1; Sheeshka, J 2; Ostbye, T 3; White, M 1			Food advertising during children's television in Canada and the UK.[Article]	NA	NA	NA	NA	NA	NA	NA	NA	NA	NA	NA	NA	NA	NA	NA	NA	NA	NA	NA	NA	NA	NA	NA	Journals@Ovid Full Text	00000740-200909000-00004.	Adams, J 1; Hennessy-Priest, K 2; Ingimarsdottir, S 1; Sheeshka, J 2; Ostbye, T 3; White, M 1	Food advertising during children's television in Canada and the UK.[Article]	Archives of Disease in Childhood. 94(9):658-662, September 2009.	NA	Original article.
NA	NA	NA	NA	NA	NA	NA	NA	NA	NA	NA	NA	NA	NA	NA	Ovid	Adams, K E; Medhurst, A L; Dart, D A; Lakin, N D			Recruitment of ATR to sites of ionising radiation-induced DNA damage requires ATM and components of the MRN protein complex.[Article]	NA	NA	NA	NA	NA	NA	NA	NA	NA	NA	NA	NA	NA	NA	NA	NA	NA	NA	NA	NA	NA	NA	NA	Journals@Ovid Full Text	00006374-200625280-00002.	Adams, K E; Medhurst, A L; Dart, D A; Lakin, N D	Recruitment of ATR to sites of ionising radiation-induced DNA damage requires ATM and components of the MRN protein complex.[Article]	Oncogene. 25(28):3894-3904, June 29, 2006.	NA	Original Article.
NA	NA	NA	NA	NA	NA	NA	NA	NA	NA	NA	NA	NA	NA	NA	Ovid	Adams, Rebecca N. MS 1; Mosher, Catherine E. PhD 1; Blair, Cindy K. PhD 2; Snyder, Denise C. MS 3; Sloane, Richard MS, MPH 4,5; Demark-Wahnefried, Wendy PhD 6			Cancer survivors' uptake and adherence in diet and exercise intervention trials: An integrative data analysis.[Article]	NA	NA	NA	NA	NA	NA	NA	NA	NA	NA	NA	NA	NA	NA	NA	NA	NA	NA	NA	NA	NA	NA	NA	Journals@Ovid Full Text	01445386-201501010-00014.	Adams, Rebecca N. MS 1; Mosher, Catherine E. PhD 1; Blair, Cindy K. PhD 2; Snyder, Denise C. MS 3; Sloane, Richard MS, MPH 4,5; Demark-Wahnefried, Wendy PhD 6	Cancer survivors' uptake and adherence in diet and exercise intervention trials: An integrative data analysis.[Article]	Cancer. 121(1):77-83, January 1, 2015.	NA	Original Article: Original Articles; Discipline; Clinical Trials.
NA	NA	NA	NA	NA	NA	NA	NA	NA	NA	NA	NA	NA	NA	NA	Ovid	Adamska I. Kupczyk K. Czerwionka-Szaflarska M.			Food allergy prevention - Hydrolysed formulas, probiotics and prebiotics.	NA	NA	NA	NA	NA	NA	NA	NA	NA	NA	NA	NA	NA	NA	NA	NA	NA	NA	NA	NA	NA	NA	NA	Embase	2009649232	Adamska I. Kupczyk K. Czerwionka-Szaflarska M.	Food allergy prevention - Hydrolysed formulas, probiotics and prebiotics.	Pediatria Wspolczesna. 11 (2) (pp 47-52), 2009. Date of Publication: 2009.	NA	NA
NA	Ari Adamy, David S. Yee, Kazuhito Matsushita, Alexandra Maschino, Angel Cronin, Andrew Vickers, Bertrand Guillonneau, Peter T. Scardino, James A. Eastham	Role of Prostate Specific Antigen and Immediate Confirmatory Biopsy in Predicting Progression During Active Surveillance for Low Risk Prostate Cancer	NA	NA	NA	NA	NA	NA	NA	NA	NA	NA	NA	NA	NCBI	Adamy, Ari; Yee, David S.; Matsushita, Kazuhito; Maschino, Alexandra; Cronin, Angel; Vickers, Andrew; Guillonneau, Bertrand; Scardino, Peter T.; Eastham, James A.			Role of Prostate Specific Antigen and Immediate Confirmatory Biopsy in Predicting Progression During Active Surveillance for Low Risk Prostate Cancer	NA	NA	NA	NA	NA	NA	NA	NA	NA	NA	NA	NA	NA	NA	NA	NA	NA	NA	NA	NA	J Urol. Author manuscript; available in PMC 2012 August 13.Published in final edited form as: J Urol. 2011 February; 185(2): 477???482. Published online 2010 December 17. doi:??10.1016/j.juro.2010.09.095	PMC3417207	Adamy, Ari; Yee, David S.; Matsushita, Kazuhito; Maschino, Alexandra; Cronin, Angel; Vickers, Andrew; Guillonneau, Bertrand; Scardino, Peter T.; Eastham, James A.	NA	NA	NA	NA	NA	NA	NA
NA	Adeniran, Akingbolahan	Non-Profit Privatization of the Management of Nigerian Public Schools: A Legal and Policy Analysis	JOURNAL OF AFRICAN LAW	NA	NA	NA	NA	NA	NA	NA	52	NA	NA	NA	WebOfKnowledge	Adeniran, Akingbolahan			Non-Profit Privatization of the Management of Nigerian Public Schools: A Legal and Policy Analysis	NA	NA	NA	NA	NA	2		369	NA		NA	0021-8553	NA	NA	NA	NA	NA	NA	NA	NA	NA	NA	NA	NA	NA	NA	NA	NA	NA	NA
NA	Geri Adler, Lonique R. Pritchett, Michael R. Kauth, Danielle Nadorff	A Pilot Project to Improve Access to Telepsychotherapy at Rural Clinics	NA	NA	NA	NA	NA	NA	NA	NA	NA	NA	NA	NA	NCBI	Adler, Geri; Pritchett, Lonique R.; Kauth, Michael R.; Nadorff, Danielle			A Pilot Project to Improve Access to Telepsychotherapy at Rural Clinics	NA	NA	NA	NA	NA	NA	NA	NA	NA	NA	NA	NA	NA	NA	NA	NA	NA	NA	NA	NA	Telemed J E Health. 2014 January 1; 20(1): 83???85. doi:??10.1089/tmj.2013.0085	PMC3880058	Adler, Geri; Pritchett, Lonique R.; Kauth, Michael R.; Nadorff, Danielle	NA	NA	NA	NA	NA	NA	NA
NA	Katie Adolphus, Clare L. Lawton, Louise Dye	The effects of breakfast on behavior and academic performance in children and adolescents	NA	NA	NA	NA	NA	NA	NA	NA	NA	NA	NA	NA	NCBI	Adolphus, Katie; Lawton, Clare L.; Dye, Louise			The effects of breakfast on behavior and academic performance in children and adolescents	NA	NA	NA	NA	NA	NA	NA	NA	NA	NA	NA	NA	NA	NA	NA	NA	NA	NA	NA	NA	Front Hum Neurosci. 2013; 7: 425. Prepublished online 2013 June 25. Published online 2013 August 8. doi:??10.3389/fnhum.2013.00425	PMC3737458	Adolphus, Katie; Lawton, Clare L.; Dye, Louise	NA	NA	NA	NA	NA	NA	NA
NA	NA	NA	NA	NA	NA	NA	NA	NA	NA	NA	NA	NA	NA	NA	Ovid	Ager, A. 1; Burnham, G. 2; Checchi, F. 3; Gayer, M. 4; Grais, R. F. 5,*; Henkens, M. 6; Massaquoi, M. B. F. 7; Nandy, R. 8; Navarro-Colorado, C. 9; Spiegel, P. 10			PERSPECTIVE: Strengthening the evidence base for health programming in humanitarian crises.[Article]	NA	NA	NA	NA	NA	NA	NA	NA	NA	NA	NA	NA	NA	NA	NA	NA	NA	NA	NA	NA	NA	NA	NA	Journals@Ovid Full Text	00007529-201409120-00043.	Ager, A. 1; Burnham, G. 2; Checchi, F. 3; Gayer, M. 4; Grais, R. F. 5,*; Henkens, M. 6; Massaquoi, M. B. F. 7; Nandy, R. 8; Navarro-Colorado, C. 9; Spiegel, P. 10	PERSPECTIVE: Strengthening the evidence base for health programming in humanitarian crises.[Article]	Science. 345(6202):1290-1292, September 12, 2014.	NA	SPECIAL SECTION GLOBAL HEALTH.
NA	NA	NA	NA	NA	NA	NA	NA	NA	NA	NA	NA	NA	NA	NA	Ovid	Agger, Else Marie 1; Cassidy, Joseph P. 2; Brady, Joseph 2; Korsholm, Karen S. 1; Vingsbo-Lundberg, Carina 1; Andersen, Peter 1			Adjuvant modulation of the cytokine balance in Mycobacterium tuberculosis subunit vaccines; immunity, pathology and protection.[Article]	NA	NA	NA	NA	NA	NA	NA	NA	NA	NA	NA	NA	NA	NA	NA	NA	NA	NA	NA	NA	NA	NA	NA	Journals@Ovid Full Text	00004227-200806000-00004.	Agger, Else Marie 1; Cassidy, Joseph P. 2; Brady, Joseph 2; Korsholm, Karen S. 1; Vingsbo-Lundberg, Carina 1; Andersen, Peter 1	Adjuvant modulation of the cytokine balance in Mycobacterium tuberculosis subunit vaccines; immunity, pathology and protection.[Article]	Immunology. 124(2):175-185, June 2008.	NA	Original article.
NA	NA	NA	NA	NA	NA	NA	NA	NA	NA	NA	NA	NA	NA	NA	Ovid	Aghaloo, Tara L.; Moy, Peter K.; Freymiller, Earl G.			Evaluation of platelet-rich plasma in combination with freeze-dried bone in the rabbit cranium: A pilot study.[Article]	NA	NA	NA	NA	NA	NA	NA	NA	NA	NA	NA	NA	NA	NA	NA	NA	NA	NA	NA	NA	NA	NA	NA	Journals@Ovid Full Text	00001698-200504000-00016.	Aghaloo, Tara L.; Moy, Peter K.; Freymiller, Earl G.	Evaluation of platelet-rich plasma in combination with freeze-dried bone in the rabbit cranium: A pilot study.[Article]	Clinical Oral Implants Research. 16(2):250-257, April 2005.	NA	Original articles.
NA	Aghaloo, TL; Moy, PK; Freymiller, EG	Investigation of platelet-rich plasma in rabbit cranial defects: A pilot study	JOURNAL OF ORAL AND MAXILLOFACIAL SURGERY	NA	NA	NA	NA	NA	NA	NA	102	NA	12378494	NA	WebOfKnowledge	Aghaloo, TL; Moy, PK; Freymiller, EG			Investigation of platelet-rich plasma in rabbit cranial defects: A pilot study	NA	NA	NA	NA	NA	10		73	NA		NA	0278-2391	NA	NA	NA	NA	NA	NA	NA	NA	NA	NA	NA	NA	NA	NA	NA	NA	NA	NA
NA	NA	NA	NA	NA	NA	NA	NA	NA	NA	NA	NA	NA	NA	NA	Ovid	Agostoni C. Decsi T. Fewtrell M. Goulet O. Kolacek S. Koletzko B. Michaelsen K.F. Moreno L. Puntis J. Rigo J. Shamir R. Szajewska H. Turck D. Van Goudoever J.			Complementary feeding: A commentary by the ESPGHAN Committee on Nutrition.	NA	NA	NA	NA	NA	NA	NA	NA	NA	NA	NA	NA	NA	NA	NA	NA	NA	NA	NA	NA	NA	NA	NA	Embase	2008006932	Agostoni C. Decsi T. Fewtrell M. Goulet O. Kolacek S. Koletzko B. Michaelsen K.F. Moreno L. Puntis J. Rigo J. Shamir R. Szajewska H. Turck D. Van Goudoever J.	Complementary feeding: A commentary by the ESPGHAN Committee on Nutrition.	Journal of Pediatric Gastroenterology and Nutrition. 46 (1) (pp 99-110), 2008. Date of Publication: January 2008.	NA	NA
NA	NA	NA	NA	NA	NA	NA	NA	NA	NA	NA	NA	NA	NA	NA	Ovid	Agostoni C. Decsi T. Fewtrell M. Goulet O. Kolacek S. Koletzko B. Michaelsen K.F. Moreno L. Puntis J. Rigo J. Shamir R. Szajewska H. Turck D. van Goudoever J. Ferreira H.			Complementary feeding: A commentary by the ESPGHAN committee on nutrition.	NA	NA	NA	NA	NA	NA	NA	NA	NA	NA	NA	NA	NA	NA	NA	NA	NA	NA	NA	NA	NA	NA	NA	Embase	2008400147	Agostoni C. Decsi T. Fewtrell M. Goulet O. Kolacek S. Koletzko B. Michaelsen K.F. Moreno L. Puntis J. Rigo J. Shamir R. Szajewska H. Turck D. van Goudoever J. Ferreira H.	Complementary feeding: A commentary by the ESPGHAN committee on nutrition.	Nascer e Crescer. 17 (2) (pp 87-89), 2008. Date of Publication: 2008.	NA	NA
NA	NA	NA	NA	NA	NA	NA	NA	NA	NA	NA	NA	NA	NA	NA	Ovid	Agras W.S. Kraemer H.C. Berkowitz R.I. Hammer L.D.			Influence of early feeding style on adiposity at 6 years of age.	NA	NA	NA	NA	NA	NA	NA	NA	NA	NA	NA	NA	NA	NA	NA	NA	NA	NA	NA	NA	NA	NA	NA	Embase	1990163198	Agras W.S. Kraemer H.C. Berkowitz R.I. Hammer L.D.	Influence of early feeding style on adiposity at 6 years of age.	Journal of Pediatrics. 116 (5) (pp 805-809), 1990. Date of Publication: 1990.	NA	NA
NA	NA	NA	NA	NA	NA	NA	NA	NA	NA	NA	NA	NA	NA	NA	Ovid	Agrawal R. Shah M. Mireskandari K. Yong G.K.			Controversies in ocular trauma classification and management: Review.	NA	NA	NA	NA	NA	NA	NA	NA	NA	NA	NA	NA	NA	NA	NA	NA	NA	NA	NA	NA	NA	NA	NA	Embase	2013786852	Agrawal R. Shah M. Mireskandari K. Yong G.K.	Controversies in ocular trauma classification and management: Review.	International Ophthalmology. 33 (4) (pp 435-445), 2013. Date of Publication: August 2013.	NA	NA
NA	NA	NA	NA	NA	NA	NA	NA	NA	NA	NA	NA	NA	NA	NA	Ovid	Aguero, Jaime; Almenar, Luis; Martinez-Dolz, Luis; Moro, Jose A; Rueda, Joaquin; Raso, Rafael; Chamorro, Carlos; Sanchez, Juan M; Salvador, Antonio			Influence of immunosuppressive regimens on short-term morbidity and mortality in heart transplantation.[Article]	NA	NA	NA	NA	NA	NA	NA	NA	NA	NA	NA	NA	NA	NA	NA	NA	NA	NA	NA	NA	NA	NA	NA	Journals@Ovid Full Text	00009046-200801000-00014.	Aguero, Jaime; Almenar, Luis; Martinez-Dolz, Luis; Moro, Jose A; Rueda, Joaquin; Raso, Rafael; Chamorro, Carlos; Sanchez, Juan M; Salvador, Antonio	Influence of immunosuppressive regimens on short-term morbidity and mortality in heart transplantation.[Article]	Clinical Transplantation. 22(1):98-106, January/February 2008.	NA	Original Article.
NA	NA	NA	NA	NA	NA	NA	NA	NA	NA	NA	NA	NA	NA	NA	Ovid	Agurs-Collins, Tanya D. PhD; Kumanyika, Shiriki K. PhD; Ten Have, Thomas R. PhD; Adams-Campbell, Lucile L. PhD			A Randomized Controlled Trial of Weight Reduction and Exercise for Diabetes Management in Older African-American Subjects.[Article]	NA	NA	NA	NA	NA	NA	NA	NA	NA	NA	NA	NA	NA	NA	NA	NA	NA	NA	NA	NA	NA	NA	NA	Journals@Ovid Full Text	00003458-199710000-00002.	Agurs-Collins, Tanya D. PhD; Kumanyika, Shiriki K. PhD; Ten Have, Thomas R. PhD; Adams-Campbell, Lucile L. PhD	A Randomized Controlled Trial of Weight Reduction and Exercise for Diabetes Management in Older African-American Subjects.[Article]	Diabetes Care. 20(10):1503-1511, October 1997.	NA	Original Article: Clinical Care/Education/Nutrition.
NA	NA	NA	NA	NA	NA	NA	NA	NA	NA	NA	NA	NA	NA	NA	Ovid	Ahmadi-Pirshahid, Dadar; Ma, Maggie; Flores-Rodriguez, Neftali; Chircop, Megan			ENDOCYTOSIS IN MITOSIS: THE ROLE OF SNX9 IN CYTOKINESIS: P56:.[Abstract]	NA	NA	NA	NA	NA	NA	NA	NA	NA	NA	NA	NA	NA	NA	NA	NA	NA	NA	NA	NA	NA	NA	NA	Journals@Ovid Full Text	01253234-201411007-00127.	Ahmadi-Pirshahid, Dadar; Ma, Maggie; Flores-Rodriguez, Neftali; Chircop, Megan	ENDOCYTOSIS IN MITOSIS: THE ROLE OF SNX9 IN CYTOKINESIS: P56:.[Abstract]	Asia-Pacific Journal of Clinical Oncology. 10 (Supplement 7):44, November 2014.	NA	SYDNEY CANCER CONFERENCE, 26 November 2014, The University of Sydney: POSTER PRESENTATION ABSTRACTS.
NA	NA	NA	NA	NA	NA	NA	NA	NA	NA	NA	NA	NA	NA	NA	Ovid	Ahmed A. Giri J. Li M. Herasevich V. Gajic O. Pickering B.			The perception of intensive care unit providers to the introduction of a novel user interface for use during morning rounds.	NA	NA	NA	NA	NA	NA	NA	NA	NA	NA	NA	NA	NA	NA	NA	NA	NA	NA	NA	NA	NA	NA	NA	Embase	71065754	Ahmed A. Giri J. Li M. Herasevich V. Gajic O. Pickering B.	The perception of intensive care unit providers to the introduction of a novel user interface for use during morning rounds.	Critical Care Medicine. Conference: 42nd Critical Care Congress of the Society of Critical Care Medicine, SCCM 2013 San Juan Puerto Rico. Conference Start: 20130119 Conference End: 20130123. Conference Publication: (var.pagings). 40 (12 SUPPL. 1) (pp 152), 2012. Date of Publication: December 2012.	NA	NA
NA	Ahmed, Adamu; Dauda, Mohammed; Garba, Stephen; Ukwenya, Yahaya	Emergency abdominal surgery in Zaria, Nigeria	SOUTH AFRICAN JOURNAL OF SURGERY	NA	NA	NA	NA	NA	NA	NA	109	NA	NA	NA	WebOfKnowledge	Ahmed, Adamu; Dauda, Mohammed; Garba, Stephen; Ukwenya, Yahaya			Emergency abdominal surgery in Zaria, Nigeria	NA	NA	NA	NA	NA	2		653	NA		NA	0038-2361	NA	NA	NA	NA	NA	NA	NA	NA	NA	NA	NA	NA	NA	NA	NA	NA	NA	NA
NA	Ahmed, AM; Urassa, DP; Gherardi, E; Game, NY	Capabilities of public, voluntary and private dispensaries in basic health service provision	WORLD HEALTH FORUM	NA	NA	NA	NA	NA	NA	NA	17	NA	8756129	NA	WebOfKnowledge	Ahmed, AM; Urassa, DP; Gherardi, E; Game, NY			Capabilities of public, voluntary and private dispensaries in basic health service provision	NA	NA	NA	NA	NA	3		348	NA		NA	0251-2432	NA	NA	NA	NA	NA	NA	NA	NA	NA	NA	NA	NA	NA	NA	NA	NA	NA	NA
NA	NA	NA	NA	NA	NA	NA	NA	NA	NA	NA	NA	NA	NA	NA	Ovid	Ahmed, Hashim U 1; Emberton, Mark +,2			Is focal therapy the future for prostate cancer?.[Review]	NA	NA	NA	NA	NA	NA	NA	NA	NA	NA	NA	NA	NA	NA	NA	NA	NA	NA	NA	NA	NA	NA	NA	Journals@Ovid Full Text	01245405-201002000-00014.	Ahmed, Hashim U 1; Emberton, Mark +,2	Is focal therapy the future for prostate cancer?.[Review]	Future Oncology. 6(2):261-268, February 2010.	NA	Review.
NA	NA	NA	NA	NA	NA	NA	NA	NA	NA	NA	NA	NA	NA	NA	Ovid	Ahmed, Hashim U.			PROSTATE CANCER: Time for active surveillance of intermediate-risk disease?.[Miscellaneous]	NA	NA	NA	NA	NA	NA	NA	NA	NA	NA	NA	NA	NA	NA	NA	NA	NA	NA	NA	NA	NA	NA	NA	Journals@Ovid Full Text	01429668-201301000-00012.	Ahmed, Hashim U.	PROSTATE CANCER: Time for active surveillance of intermediate-risk disease?.[Miscellaneous]	Nature Reviews Urology. 10(1):6-8, January 2013.	NA	NEWS & VIEWS.
NA	NA	NA	NA	NA	NA	NA	NA	NA	NA	NA	NA	NA	NA	NA	Ovid	Ahmed, Hashim Uddin *; Pendse, Doug; Illing, Rowland; Allen, Clare; van der Meulen, Jan HP; Emberton, Mark			Will focal therapy become a standard of care for men with localized prostate cancer?[Review]	NA	NA	NA	NA	NA	NA	NA	NA	NA	NA	NA	NA	NA	NA	NA	NA	NA	NA	NA	NA	NA	NA	NA	Journals@Ovid Full Text	01223060-200711000-00022.	Ahmed, Hashim Uddin *; Pendse, Doug; Illing, Rowland; Allen, Clare; van der Meulen, Jan HP; Emberton, Mark	Will focal therapy become a standard of care for men with localized prostate cancer?[Review]	Nature Clinical Practice Oncology. 4(11):632-642, November 2007.	NA	Review.
NA	NA	NA	NA	NA	NA	NA	NA	NA	NA	NA	NA	NA	NA	NA	Ovid	Ahmed, Hashim Uddin a,*,+,++; Hu, Yipeng b,+; Carter, Tim b,[S]; Arumainayagam, Nimalan a; Lecornet, Emilie e; Freeman, Alex c,[P]; Hawkes, David b,++; Barratt, Dean C. b,[S]; Emberton, Mark a,d,**			Characterizing Clinically Significant Prostate Cancer Using Template Prostate Mapping Biopsy.[Miscellaneous Article]	NA	NA	NA	NA	NA	NA	NA	NA	NA	NA	NA	NA	NA	NA	NA	NA	NA	NA	NA	NA	NA	NA	NA	Journals@Ovid Full Text	00076734-201108000-00026.	Ahmed, Hashim Uddin a,*,+,++; Hu, Yipeng b,+; Carter, Tim b,[S]; Arumainayagam, Nimalan a; Lecornet, Emilie e; Freeman, Alex c,[P]; Hawkes, David b,++; Barratt, Dean C. b,[S]; Emberton, Mark a,d,**	Characterizing Clinically Significant Prostate Cancer Using Template Prostate Mapping Biopsy.[Miscellaneous Article]	Journal of Urology. 186(2):458-464, August 2011.	NA	Adult Urology:Oncology: Prostate/Testis/Penis/Urethra.
NA	NA	NA	NA	NA	NA	NA	NA	NA	NA	NA	NA	NA	NA	NA	Ovid	Ahmed, Hashim Uddin; Emberton, Mark			Re: Focal Therapy for Localized Prostate Cancer: A Critical Appraisal of Rationale and Modalities: S. E. Eggener, P. T. Scardino, P. R. Carroll, M. J. Zelefsky, O. Sartor, H. Hricak, T. M. Wheeler, S. W. Fine, J. Trachtenberg, M. A. Rubin, M. Ohori, K. Kuroiwa, M. Rossignol and L. Abenhaim, International Task Force on Prostate Cancer and the Focal Lesion Paradigm.[Letter]	NA	NA	NA	NA	NA	NA	NA	NA	NA	NA	NA	NA	NA	NA	NA	NA	NA	NA	NA	NA	NA	NA	NA	Journals@Ovid Full Text	00076734-200808000-00122.	Ahmed, Hashim Uddin; Emberton, Mark	Re: Focal Therapy for Localized Prostate Cancer: A Critical Appraisal of Rationale and Modalities: S. E. Eggener, P. T. Scardino, P. R. Carroll, M. J. Zelefsky, O. Sartor, H. Hricak, T. M. Wheeler, S. W. Fine, J. Trachtenberg, M. A. Rubin, M. Ohori, K. Kuroiwa, M. Rossignol and L. Abenhaim, International Task Force on Prostate Cancer and the Focal Lesion Paradigm.[Letter]	Journal of Urology. 180(2):780-781, August 2008.	NA	Letter to the Editor/Errata.
NA	NA	NA	NA	NA	NA	NA	NA	NA	NA	NA	NA	NA	NA	NA	Ovid	AHMED, K.; GODBOLE, H. C.; DASGUPTA, P.; KHAN, M. S.			Volvulus - a rare complication of ileal conduit.[Report]	NA	NA	NA	NA	NA	NA	NA	NA	NA	NA	NA	NA	NA	NA	NA	NA	NA	NA	NA	NA	NA	NA	NA	Journals@Ovid Full Text	00066764-200507000-00024.	AHMED, K.; GODBOLE, H. C.; DASGUPTA, P.; KHAN, M. S.	Volvulus - a rare complication of ileal conduit.[Report]	International Journal of Clinical Practice. 59(7):858-860, July 2005.	NA	CASE REPORT.
NA	NA	NA	NA	NA	NA	NA	NA	NA	NA	NA	NA	NA	NA	NA	Ovid	Ahmed, M.; Davis, G. R.; Wong, F. S.L.			X-Ray Microtomography Study to Validate the Efficacies of Caries Removal in Primary Molars by Hand Excavation and Chemo-Mechanical Technique.[Article]	NA	NA	NA	NA	NA	NA	NA	NA	NA	NA	NA	NA	NA	NA	NA	NA	NA	NA	NA	NA	NA	NA	NA	Journals@Ovid Full Text	00002860-201212000-00010.	Ahmed, M.; Davis, G. R.; Wong, F. S.L.	X-Ray Microtomography Study to Validate the Efficacies of Caries Removal in Primary Molars by Hand Excavation and Chemo-Mechanical Technique.[Article]	Caries Research. 46(6):561-567, December 2012.	NA	Original Paper.
NA	Nasim Ahmed, Jerome J Vernick	Management of liver trauma in adults	NA	NA	NA	NA	NA	NA	NA	NA	NA	NA	NA	NA	NCBI	Ahmed, Nasim; Vernick, Jerome J			Management of liver trauma in adults	NA	NA	NA	NA	NA	NA	NA	NA	NA	NA	NA	NA	NA	NA	NA	NA	NA	NA	NA	NA	J Emerg Trauma Shock. 2011 Jan-Mar; 4(1): 114???119. doi:??10.4103/0974-2700.76846	PMC3097559	Ahmed, Nasim; Vernick, Jerome J	NA	NA	NA	NA	NA	NA	NA
NA	Hong Jae Ahn, Young Hwii Ko, Hoon Ah Jang, Sung Gu Kang, Seok Ho Kang, Hong Seok Park, Jeong Gu Lee, Je Jong Kim, Jun Cheon	Single Positive Core Prostate Cancer in a 12-Core Transrectal Biopsy Scheme: Clinicopathological Implications Compared with Multifocal Counterpart	NA	NA	NA	NA	NA	NA	NA	NA	NA	NA	NA	NA	NCBI	Ahn, Hong Jae; Ko, Young Hwii; Jang, Hoon Ah; Kang, Sung Gu; Kang, Seok Ho; Park, Hong Seok; Lee, Jeong Gu; Kim, Je Jong; Cheon, Jun			Single Positive Core Prostate Cancer in a 12-Core Transrectal Biopsy Scheme: Clinicopathological Implications Compared with Multifocal Counterpart	NA	NA	NA	NA	NA	NA	NA	NA	NA	NA	NA	NA	NA	NA	NA	NA	NA	NA	NA	NA	Korean J Urol. 2010 October; 51(10): 671???676. Published online 2010 October 21. doi:??10.4111/kju.2010.51.10.671	PMC2963778	Ahn, Hong Jae; Ko, Young Hwii; Jang, Hoon Ah; Kang, Sung Gu; Kang, Seok Ho; Park, Hong Seok; Lee, Jeong Gu; Kim, Je Jong; Cheon, Jun	NA	NA	NA	NA	NA	NA	NA
NA	NA	NA	NA	NA	NA	NA	NA	NA	NA	NA	NA	NA	NA	NA	Ovid	Ahn, J Y. MD, PhD; Han, I B. MD; Yoon, P H. MD; Kim, S H. MD; Kim, N K. PhD; Kim, S PhD; Joo, J Y. MD, PhD			Clipping vs coiling of posterior communicating artery aneurysms with third nerve palsy.[Miscellaneous]	NA	NA	NA	NA	NA	NA	NA	NA	NA	NA	NA	NA	NA	NA	NA	NA	NA	NA	NA	NA	NA	NA	NA	Journals@Ovid Full Text	00006114-200601100-00031.	Ahn, J Y. MD, PhD; Han, I B. MD; Yoon, P H. MD; Kim, S H. MD; Kim, N K. PhD; Kim, S PhD; Joo, J Y. MD, PhD	Clipping vs coiling of posterior communicating artery aneurysms with third nerve palsy.[Miscellaneous]	Neurology. 66(1):121-123, January 10, 2006.	NA	Brief Communications.
NA	NA	NA	NA	NA	NA	NA	NA	NA	NA	NA	NA	NA	NA	NA	Ovid	Ahuja, Nitin K.			Fordism in the Hospital: Albert Kahn and the Design of Old Main, 1917-25.[Article]	NA	NA	NA	NA	NA	NA	NA	NA	NA	NA	NA	NA	NA	NA	NA	NA	NA	NA	NA	NA	NA	NA	NA	Journals@Ovid Full Text	00004859-201207000-00003.	Ahuja, Nitin K.	Fordism in the Hospital: Albert Kahn and the Design of Old Main, 1917-25.[Article]	Journal of the History of Medicine & Allied Sciences. 67(3):398-427, July 2012.	NA	Articles.
NA	NA	NA	NA	NA	NA	NA	NA	NA	NA	NA	NA	NA	NA	NA	Ovid	Ain, Michael C. MD *; Shirley, Eric D. MD *; Pirouzmanesh, Ashkan BS *; Hariri, Arvin BS *; Carson, Benjamin S. MD +			Postlaminectomy Kyphosis in the Skeletally Immature Achondroplast.[Miscellaneous Article]	NA	NA	NA	NA	NA	NA	NA	NA	NA	NA	NA	NA	NA	NA	NA	NA	NA	NA	NA	NA	NA	NA	NA	Journals@Ovid Full Text	00007632-200601150-00014.	Ain, Michael C. MD *; Shirley, Eric D. MD *; Pirouzmanesh, Ashkan BS *; Hariri, Arvin BS *; Carson, Benjamin S. MD +	Postlaminectomy Kyphosis in the Skeletally Immature Achondroplast.[Miscellaneous Article]	Spine. 31(2):197-201, January 15, 2006.	NA	Deformity.
NA	Zoe Aitken, Valerie A McCormack, Ralph P Highnam, Lisa Martin, Anoma Gunasekara, Olga Melnichouk, Gord Mawdsley, Chris Peressotti, Martin Yaffe, Norman F Boyd, Isabel dos Santos Silva	Screen-film mammographic density and breast cancer risk: a comparison of the volumetric Standard Mammogram Form and the Interactive Threshold Measurement Methods	NA	NA	NA	NA	NA	NA	NA	NA	NA	NA	NA	NA	NCBI	Aitken, Zoe; McCormack, Valerie A; Highnam, Ralph P; Martin, Lisa; Gunasekara, Anoma; Melnichouk, Olga; Mawdsley, Gord; Peressotti, Chris; Yaffe, Martin; Boyd, Norman F; Silva, Isabel dos Santos			Screen-film mammographic density and breast cancer risk: a comparison of the volumetric Standard Mammogram Form and the Interactive Threshold Measurement Methods	NA	NA	NA	NA	NA	NA	NA	NA	NA	NA	NA	NA	NA	NA	NA	NA	NA	NA	NA	NA	Cancer Epidemiol Biomarkers Prev. Author manuscript; available in PMC 2010 August 1.Published in final edited form as: Cancer Epidemiol Biomarkers Prev. 2010 February; 19(2): 418???428. doi:??10.1158/1055-9965.EPI-09-1059	PMC2875111	Aitken, Zoe; McCormack, Valerie A; Highnam, Ralph P; Martin, Lisa; Gunasekara, Anoma; Melnichouk, Olga; Mawdsley, Gord; Peressotti, Chris; Yaffe, Martin; Boyd, Norman F; Silva, Isabel dos Santos	NA	NA	NA	NA	NA	NA	NA
NA	O.A. Akadiri	NASO-ORBITO-ETHMOID FRACTURES: PERSPECTIVE AND PRACTICES OF NIGERIAN SURGEONS	NA	NA	NA	NA	NA	NA	NA	NA	NA	NA	NA	NA	NCBI	Akadiri, O.A.			NASO-ORBITO-ETHMOID FRACTURES: PERSPECTIVE AND PRACTICES OF NIGERIAN SURGEONS	NA	NA	NA	NA	NA	NA	NA	NA	NA	NA	NA	NA	NA	NA	NA	NA	NA	NA	NA	NA	Ann Ib Postgrad Med. 2012 December; 10(2): 40???47.	PMC4111055	Akadiri, O.A.	NA	NA	NA	NA	NA	NA	NA
NA	NA	NA	NA	NA	NA	NA	NA	NA	NA	NA	NA	NA	NA	NA	Ovid	Akdeniz B.G. Grondahl H.-G.			Degradation of storage phosphor images due to scanning delay.	NA	NA	NA	NA	NA	NA	NA	NA	NA	NA	NA	NA	NA	NA	NA	NA	NA	NA	NA	NA	NA	NA	NA	Embase	2006151209	Akdeniz B.G. Grondahl H.-G.	Degradation of storage phosphor images due to scanning delay.	Dentomaxillofacial Radiology. 35 (2) (pp 74-77), 2006. Date of Publication: March 2006.	NA	NA
NA	NA	NA	NA	NA	NA	NA	NA	NA	NA	NA	NA	NA	NA	NA	Ovid	Akdeniz, B. G.; Eyuboglu, T. F. *; Sen, B. H.; Erdilek, N.			Radiopacity of root fillings in simulated canals: the effect of sealer: R39.[Abstract]	NA	NA	NA	NA	NA	NA	NA	NA	NA	NA	NA	NA	NA	NA	NA	NA	NA	NA	NA	NA	NA	NA	NA	Journals@Ovid Full Text	00004310-200512000-00052.	Akdeniz, B. G.; Eyuboglu, T. F. *; Sen, B. H.; Erdilek, N.	Radiopacity of root fillings in simulated canals: the effect of sealer: R39.[Abstract]	International Endodontic Journal. 38(12):931, December 2005.	NA	ABSTRACTS: European Society of Endodontology 12th Biennial Congress: Research Posters - Filling.
NA	NA	NA	NA	NA	NA	NA	NA	NA	NA	NA	NA	NA	NA	NA	Ovid	Akdeniz, B. G.; Eyuboglu, T. F. *; Sen, B. H.; Erdilek, N.			Radiopacity of root fillings in simulated canals: the effect of sealer: R39.[Abstract]	NA	NA	NA	NA	NA	NA	NA	NA	NA	NA	NA	NA	NA	NA	NA	NA	NA	NA	NA	NA	NA	NA	NA	Journals@Ovid Full Text	00004310-200500381-00043.	Akdeniz, B. G.; Eyuboglu, T. F. *; Sen, B. H.; Erdilek, N.	Radiopacity of root fillings in simulated canals: the effect of sealer: R39.[Abstract]	International Endodontic Journal. 38 (Supplement 1):14, 2005.	NA	ABSTRACTS: Research Posters - Filling.
NA	NA	NA	NA	NA	NA	NA	NA	NA	NA	NA	NA	NA	NA	NA	Ovid	Akdeniz, B. Guniz DDS, PhD a; Grondahl, Hans-Goran DDS, PhD b; Kose, Timur PhD c			Effect of delayed scanning of storage phosphor plates.[Miscellaneous Article]	NA	NA	NA	NA	NA	NA	NA	NA	NA	NA	NA	NA	NA	NA	NA	NA	NA	NA	NA	NA	NA	NA	NA	Journals@Ovid Full Text	00043790-200505000-00017.	Akdeniz, B. Guniz DDS, PhD a; Grondahl, Hans-Goran DDS, PhD b; Kose, Timur PhD c	Effect of delayed scanning of storage phosphor plates.[Miscellaneous Article]	Oral Surgery, Oral Medicine, Oral Pathology, Oral Radiology, & Endodontics. 99(5):603-607, May 2005.	NA	ORAL AND MAXILLOFACIAL RADIOLOGY.
NA	NA	NA	NA	NA	NA	NA	NA	NA	NA	NA	NA	NA	NA	NA	Ovid	Akerblom, Hans K. 1; Knip, Mikael 2; Simell, Olli 3			From Pathomechanisms to Prediction, Prevention and Improved Care of Insulin-dependent Diabetes Mellitus in Children.[Article]	NA	NA	NA	NA	NA	NA	NA	NA	NA	NA	NA	NA	NA	NA	NA	NA	NA	NA	NA	NA	NA	NA	NA	Journals@Ovid Full Text	00002099-199710000-00007.	Akerblom, Hans K. 1; Knip, Mikael 2; Simell, Olli 3	From Pathomechanisms to Prediction, Prevention and Improved Care of Insulin-dependent Diabetes Mellitus in Children.[Article]	Annals of Medicine. 29(5):383-385, October 1997.	NA	Special Section: Childhood Diabetes - New Insights Into Pathogenesis, Treatment And Prevention.
NA	Ardavan Akhavan, Paul A. Merguerian, Cindy Larison, Adam B. Goldin, Margarett Shnorhavorian	Trends in the Rates of Pediatric Pyeloplasty for Ureteropelvic Junction Obstruction over 19 Years: A PHIS Database Study	NA	NA	NA	NA	NA	NA	NA	NA	NA	NA	NA	NA	NCBI	Akhavan, Ardavan; Merguerian, Paul A.; Larison, Cindy; Goldin, Adam B.; Shnorhavorian, Margarett			Trends in the Rates of Pediatric Pyeloplasty for Ureteropelvic Junction Obstruction over 19 Years: A PHIS Database Study	NA	NA	NA	NA	NA	NA	NA	NA	NA	NA	NA	NA	NA	NA	NA	NA	NA	NA	NA	NA	Adv Urol. 2014; 2014: 142625. Published online 2014 May 13. doi:??10.1155/2014/142625	PMC4052929	Akhavan, Ardavan; Merguerian, Paul A.; Larison, Cindy; Goldin, Adam B.; Shnorhavorian, Margarett	NA	NA	NA	NA	NA	NA	NA
NA	NA	NA	NA	NA	NA	NA	NA	NA	NA	NA	NA	NA	NA	NA	Ovid	Akin, Ibrahim; Kische, Stephan; Rehders, Tim C; Ince, Huseyin; Nienaber, Christoph A			Thoracic endovascular stent-graft therapy in aortic dissection.[Miscellaneous Article]	NA	NA	NA	NA	NA	NA	NA	NA	NA	NA	NA	NA	NA	NA	NA	NA	NA	NA	NA	NA	NA	NA	NA	Journals@Ovid Full Text	00001573-201011000-00005.	Akin, Ibrahim; Kische, Stephan; Rehders, Tim C; Ince, Huseyin; Nienaber, Christoph A	Thoracic endovascular stent-graft therapy in aortic dissection.[Miscellaneous Article]	Current Opinion in Cardiology. 25(6):552-559, November 2010.	NA	Diseases of the aorta, pulmonary and peripheral vessels: Edited by Alan Braverman.
NA	NA	NA	NA	NA	NA	NA	NA	NA	NA	NA	NA	NA	NA	NA	Ovid	Akins-Crichlow, Lynnetta BSN, RN, CNRN; Armstrong, Donna MSM, RN, CAGS, CCRN; DeBenedictis, Laura BSN, CPN; McLellan, Mary BSN, RN, CMT, CPN; Quigley, Louise BSN, RN, BC; Sinclair, Cheri RN, BC			Electronic Health Record: Improving Patient Safety: 003.[Abstract]	NA	NA	NA	NA	NA	NA	NA	NA	NA	NA	NA	NA	NA	NA	NA	NA	NA	NA	NA	NA	NA	NA	NA	Journals@Ovid Full Text	00005212-200904000-00013.	Akins-Crichlow, Lynnetta BSN, RN, CNRN; Armstrong, Donna MSM, RN, CAGS, CCRN; DeBenedictis, Laura BSN, CPN; McLellan, Mary BSN, RN, CMT, CPN; Quigley, Louise BSN, RN, BC; Sinclair, Cheri RN, BC	Electronic Health Record: Improving Patient Safety: 003.[Abstract]	Journal of Pediatric Nursing. 24(2):e1-e2, April 2009.	NA	SPN 2009 Convention Abstracts.
CD000171	Akolo Christopher; Adetifa Ifedayo; Shepperd Sasha; Volmink Jimmy	Treatment of latent tuberculosis infection in HIV infected persons	Cochrane Database of Systematic Reviews	2010	1	John Wiley & Sons, Ltd	AIDS-Related Opportunistic Infections [prevention & control];Antitubercular Agents [therapeutic use];HIV Infections [complications];Isoniazid [therapeutic use];Latent Tuberculosis [drug therapy];Randomized Controlled Trials as Topic;Tuberculin Test;Tuberculosis, Pulmonary [prevention & control];Adult[checkword];Humans[checkword]	HIV	10.1002/14651858.CD000171.pub3	NA	NA	NA	NA	NA	Cochrane	Akolo Christopher; Adetifa Ifedayo; Shepperd Sasha; Volmink Jimmy			Treatment of latent tuberculosis infection in HIV infected persons	NA	NA	NA	NA	NA	NA	NA	NA	NA	NA	NA	NA	NA	NA	NA	NA	NA	NA	NA	NA	NA	NA	NA	NA	NA	NA	NA	NA	NA	NA
NA	NA	NA	NA	NA	NA	NA	NA	NA	NA	NA	NA	NA	NA	NA	Ovid	Aktan A.M. Ciftci M.E. Akgunlu F.			Comparison of the delay in processing time and protective plastic cases in two phosphor plate systems.	NA	NA	NA	NA	NA	NA	NA	NA	NA	NA	NA	NA	NA	NA	NA	NA	NA	NA	NA	NA	NA	NA	NA	Embase	23213301	Aktan A.M. Ciftci M.E. Akgunlu F.	Comparison of the delay in processing time and protective plastic cases in two phosphor plate systems.	TheScientificWorldJournal. 2012 (pp 850764), 2012. Date of Publication: 2012.	NA	NA
NA	Nada Al-Hadithy, Joanna Mennie, Ken Stewart	Two different management modalities in a two sibling case report of Adams Oliver syndrome	NA	NA	NA	NA	NA	NA	NA	NA	NA	NA	NA	NA	NCBI	Al-Hadithy, Nada; Mennie, Joanna; Stewart, Ken			Two different management modalities in a two sibling case report of Adams Oliver syndrome	NA	NA	NA	NA	NA	NA	NA	NA	NA	NA	NA	NA	NA	NA	NA	NA	NA	NA	NA	NA	BMJ Case Rep. 2011; 2011: bcr1020114965. Published online 2011 December 22. doi:??10.1136/bcr.10.2011.4965	PMC3246166	Al-Hadithy, Nada; Mennie, Joanna; Stewart, Ken	NA	NA	NA	NA	NA	NA	NA
2003-00504-006	NA	NA	NA	NA	NA	University of Jordan	NA	NA	NA	NA	30	NA	NA	NA	PsycINFO	Al-Hilah, Moahmmed Mahmoud			The Effect of an Inquiry Program Based on Environmental Instructional Media on the Immediate and Delayed Achievement of Seventh Graders in Science, and Enhancing their Creative Thinking. [The Effect of an Inquiry Program Based on Environmental Instructional Media on the Immediate and Delayed Achievement of Seventh Graders in Science, and Enhancing their Creative Thinking.]	*Creativity; *Science Achievement; *Teaching Methods; Instructional Media; Junior High School Students	NA	The Effect of an Inquiry Program Based on Environmental Instructional Media on the Immediate and Delayed Achievement of Seventh Graders in Science, and Enhancing their Creative Thinking. [The Effect of an Inquiry Program Based on Environmental Instructional Media on the Immediate and Delayed Achievement of Seventh Graders in Science, and Enhancing their Creative Thinking.]	Dirasat: Educational Sciences	Al-Hilah, Moahmmed Mahmoud	1	88	104	2003	Jordan	Al-Hilah, Moahmmed Mahmoud: Faculty of Educational Sciences/U.N.R.W.A., Amman, Jordan	1026-3713(Print)	Studied the effect of a well-developed inquiry program on the immediate and delayed achievement of 7th graders in science, and enhancing their creative thinking. In all, 87 participants were assigned to an experimental group (inquiry-based teaching program) and 87 were assigned to a control group (traditional educational approach). Statistically significant differences were found in: (1) immediat…	*Creativity; *Science Achievement; *Teaching Methods; Instructional Media; Junior High School Students	NA	NA	NA	NA	NA	NA	NA	NA	NA	NA	NA	NA	NA	NA	NA	NA
NA	NA	NA	NA	NA	NA	NA	NA	NA	NA	NA	NA	NA	NA	NA	Ovid	Al-Hussaini, Abdulrahman *; Tredger, J Michael +; Dhawan, Anil *			Immunosuppression in Pediatric Liver and Intestinal Transplantation: A Closer Look at the Arsenal.[Review]	NA	NA	NA	NA	NA	NA	NA	NA	NA	NA	NA	NA	NA	NA	NA	NA	NA	NA	NA	NA	NA	NA	NA	Journals@Ovid Full Text	00005176-200508000-00002.	Al-Hussaini, Abdulrahman *; Tredger, J Michael +; Dhawan, Anil *	Immunosuppression in Pediatric Liver and Intestinal Transplantation: A Closer Look at the Arsenal.[Review]	Journal of Pediatric Gastroenterology & Nutrition. 41(2):152-165, August 2005.	NA	Invited Review.
NA	NA	NA	NA	NA	NA	NA	NA	NA	NA	NA	NA	NA	NA	NA	Ovid	Al-Ibrahim, Hind A. BDS, SSC-ARD 1; Al-Hadlaq, Solaiman M. BDS, MS, PhD 2,*; Abduljabbar, Tariq S. BDS, MSc, DMSc 4; Al-Hamdan, Khalid S. BDS, MS 4; Abdin, Hassan A. BDS, RCPS 5			Surgical and implant-supported fixed prosthetic treatment of a patient with ectodermal dysplasia: a case report.[Article]	NA	NA	NA	NA	NA	NA	NA	NA	NA	NA	NA	NA	NA	NA	NA	NA	NA	NA	NA	NA	NA	NA	NA	Journals@Ovid Full Text	01445506-201201000-00001.	Al-Ibrahim, Hind A. BDS, SSC-ARD 1; Al-Hadlaq, Solaiman M. BDS, MS, PhD 2,*; Abduljabbar, Tariq S. BDS, MSc, DMSc 4; Al-Hamdan, Khalid S. BDS, MS 4; Abdin, Hassan A. BDS, RCPS 5	Surgical and implant-supported fixed prosthetic treatment of a patient with ectodermal dysplasia: a case report.[Article]	Special Care In Dentistry. 32(1):1-5, January/February 2012.	NA	ARTICLES.
NA	Manal Al-Malik	Oral injuries in children attending a hospital in Saudi Arabia	NA	NA	NA	NA	NA	NA	NA	NA	NA	NA	NA	NA	NCBI	Al-Malik, Manal			Oral injuries in children attending a hospital in Saudi Arabia	NA	NA	NA	NA	NA	NA	NA	NA	NA	NA	NA	NA	NA	NA	NA	NA	NA	NA	NA	NA	J Maxillofac Oral Surg. 2009 March; 8(1): 34???39. Published online 2009 June 10. doi:??10.1007/s12663-009-0009-8	PMC3454025	Al-Malik, Manal	NA	NA	NA	NA	NA	NA	NA
NA	Mohammed S Al-Marhoon	Small Incidental Renal Masses in Adults: Review of the literature	NA	NA	NA	NA	NA	NA	NA	NA	NA	NA	NA	NA	NCBI	Al-Marhoon, Mohammed S			Small Incidental Renal Masses in Adults: Review of the literature	NA	NA	NA	NA	NA	NA	NA	NA	NA	NA	NA	NA	NA	NA	NA	NA	NA	NA	NA	NA	Sultan Qaboos Univ Med J. 2010 August; 10(2): 196???202. Published online 2010 July 19.	PMC3074712	Al-Marhoon, Mohammed S	NA	NA	NA	NA	NA	NA	NA
NA	Abdulmohsen A. Al-Mulhim	A Survey of Surgical Management of Acute Cholecystitis in Eastern Saudi Arabia	NA	NA	NA	NA	NA	NA	NA	NA	NA	NA	NA	NA	NCBI	Al-Mulhim, Abdulmohsen A.			A Survey of Surgical Management of Acute Cholecystitis in Eastern Saudi Arabia	NA	NA	NA	NA	NA	NA	NA	NA	NA	NA	NA	NA	NA	NA	NA	NA	NA	NA	NA	NA	Saudi J Gastroenterol. 2009 July; 15(3): 176???180. doi:??10.4103/1319-3767.54748	PMC2841417	Al-Mulhim, Abdulmohsen A.	NA	NA	NA	NA	NA	NA	NA
NA	Saad Al-Qahtani, Hasan M. Al-Dorzi	Rapid response systems in acute hospital care	NA	NA	NA	NA	NA	NA	NA	NA	NA	NA	NA	NA	NCBI	Al-Qahtani, Saad; Al-Dorzi, Hasan M.			Rapid response systems in acute hospital care	NA	NA	NA	NA	NA	NA	NA	NA	NA	NA	NA	NA	NA	NA	NA	NA	NA	NA	NA	NA	Ann Thorac Med. 2010 Jan-Mar; 5(1): 1???4. doi:??10.4103/1817-1737.58952	PMC2841802	Al-Qahtani, Saad; Al-Dorzi, Hasan M.	NA	NA	NA	NA	NA	NA	NA
NA	NA	NA	NA	NA	NA	NA	NA	NA	NA	NA	NA	NA	NA	NA	Ovid	Al-Rawi, S. 1; Spargo, P. 2			A retrospective study of anaesthetic caseload of Specialist Registrars following the introduction of new working patterns in the Wessex region *.[Article]	NA	NA	NA	NA	NA	NA	NA	NA	NA	NA	NA	NA	NA	NA	NA	NA	NA	NA	NA	NA	NA	NA	NA	Journals@Ovid Full Text	00000524-200903000-00013.	Al-Rawi, S. 1; Spargo, P. 2	A retrospective study of anaesthetic caseload of Specialist Registrars following the introduction of new working patterns in the Wessex region *.[Article]	Anaesthesia. 64(3):297-300, March 2009.	NA	Original articles.
NA	NA	NA	NA	NA	NA	NA	NA	NA	NA	NA	NA	NA	NA	NA	Ovid	Al-Rawi, S.; Spargo, P.			Effect of the 48-hour week on training in anaesthesia.[Letter]	NA	NA	NA	NA	NA	NA	NA	NA	NA	NA	NA	NA	NA	NA	NA	NA	NA	NA	NA	NA	NA	NA	NA	Journals@Ovid Full Text	00000524-200908000-00018.	Al-Rawi, S.; Spargo, P.	Effect of the 48-hour week on training in anaesthesia.[Letter]	Anaesthesia. 64(8):915-916, August 2009.	NA	Correspondence.
NA	NA	NA	NA	NA	NA	NA	NA	NA	NA	NA	NA	NA	NA	NA	Ovid	Al Hait S.			Phenylketonuria (PKU) in Jordan.	NA	NA	NA	NA	NA	NA	NA	NA	NA	NA	NA	NA	NA	NA	NA	NA	NA	NA	NA	NA	NA	NA	NA	Embase	70500006	Al Hait S.	Phenylketonuria (PKU) in Jordan.	Journal of Inherited Metabolic Disease. Conference: 7th ISNS European Neonatal Screening Regional Meeting: Neonatal Screening in Europe Geneva Switzerland. Conference Start: 20110828 Conference End: 20110830. Conference Publication: (var.pagings). 34 (pp S28), 2011. Date of Publication: August 2011.	NA	NA
NA	NA	NA	NA	NA	NA	NA	NA	NA	NA	NA	NA	NA	NA	NA	Ovid	Al Khalifah K. Brindhaban A. Al Baloul G. Al Bather F. Abdulgafoor M.			Optical density changes in dry-processed films.	NA	NA	NA	NA	NA	NA	NA	NA	NA	NA	NA	NA	NA	NA	NA	NA	NA	NA	NA	NA	NA	NA	NA	Embase	17848529	Al Khalifah K. Brindhaban A. Al Baloul G. Al Bather F. Abdulgafoor M.	Optical density changes in dry-processed films.	Radiologic technology. 79 (1) (pp 9-16), 2007. Date of Publication: 2007 Sep-Oct.	NA	NA
NA	NA	NA	NA	NA	NA	NA	NA	NA	NA	NA	NA	NA	NA	NA	Ovid	Al Khalifah K. Brindhaban A. AlArfaj R. Jassim O.			Image quality of digital mammography images produced using wet and dry laser imaging systems.	NA	NA	NA	NA	NA	NA	NA	NA	NA	NA	NA	NA	NA	NA	NA	NA	NA	NA	NA	NA	NA	NA	NA	Embase	2006028328	Al Khalifah K. Brindhaban A. AlArfaj R. Jassim O.	Image quality of digital mammography images produced using wet and dry laser imaging systems.	Radiography. 12 (1) (pp 13-19), 2006. Date of Publication: February 2006.	NA	NA
NA	NA	NA	NA	NA	NA	NA	NA	NA	NA	NA	NA	NA	NA	NA	Ovid	Al Otaibi, Mohammed MD 1; Ross, Philip MD 1; Fahmy, Nader MD 1; Jeyaganth, Suganthiny MsC 1; Trottier, Helen PhD 2; Sircar, Kanishka MD 3; Begin, Louis R. MD 3; Souhami, Luis MD 4; Kassouf, Wassim MD 1; Aprikian, Armen MD 1; Tanguay, Simon MD 1*,+			Role of Repeated Biopsy of the Prostate in Predicting Disease Progression in Patients With Prostate Cancer on Active Surveillance.[Miscellaneous Article]	NA	NA	NA	NA	NA	NA	NA	NA	NA	NA	NA	NA	NA	NA	NA	NA	NA	NA	NA	NA	NA	NA	NA	Journals@Ovid Full Text	01445386-200807150-00007.	Al Otaibi, Mohammed MD 1; Ross, Philip MD 1; Fahmy, Nader MD 1; Jeyaganth, Suganthiny MsC 1; Trottier, Helen PhD 2; Sircar, Kanishka MD 3; Begin, Louis R. MD 3; Souhami, Luis MD 4; Kassouf, Wassim MD 1; Aprikian, Armen MD 1; Tanguay, Simon MD 1*,+	Role of Repeated Biopsy of the Prostate in Predicting Disease Progression in Patients With Prostate Cancer on Active Surveillance.[Miscellaneous Article]	Cancer. 113(2):286-292, July 15, 2008.	NA	Genitourinary Disease.
NA	Al Roy, LS	Gas utility completes geospatial conversion and acronym (AM/FM/GIS/CAD/CIS/GPS) integration	CONFERENCE XXII - GEOSPATIAL INFORMATION & TECHNOLOGY ASSOCIATION, PROCEEDINGS	NA	NA	NA	NA	NA	NA	NA	1	NA	NA	NA	WebOfKnowledge	Al Roy, LS			Gas utility completes geospatial conversion and acronym (AM/FM/GIS/CAD/CIS/GPS) integration	NA	NA	NA	NA	NA		Geospatial Informat & Technol Assoc	688	NA	APR 25-28, 1999	NA		NA	NA	NA	NA	NA	NA	NA	NA	NA	NA	NA	NA	NA	NA	NA	NA	NA	NA
NA	NA	NA	NA	NA	NA	NA	NA	NA	NA	NA	NA	NA	NA	NA	ISRCTN	Ala-Ruona, Esa	NA	NA	Active music therapy for post-stroke recovery	NA	NA	NA	NA	NA	NA	NA	NA	NA	NA	NA	NA	NA	NA	NA	NA	NA	NA	NA	NA	NA	NA	NA	NA	NA	NA	Active music therapy for post-stroke recovery	NA	NA	NA
NA	NA	NA	NA	NA	NA	NA	NA	NA	NA	NA	NA	NA	NA	NA	Ovid	Alaam A. Bani M.			Mesiodens as a risk factor in treatment of trauma cases.	NA	NA	NA	NA	NA	NA	NA	NA	NA	NA	NA	NA	NA	NA	NA	NA	NA	NA	NA	NA	NA	NA	NA	Embase	19290890	Alaam A. Bani M.	Mesiodens as a risk factor in treatment of trauma cases.	Dental Traumatology. 25 (2) (pp e25-e31), 2009. Date of Publication: April 2009.	NA	NA
NA	Constance Alabert, Jimi-Carlo Bukowski-Wills, Sung-Bau Lee, Georg Kustatscher, Kyosuke Nakamura, Flavia de Lima Alves, Patrice Menard, Jakob Mejlvang, Juri Rappsilber, Anja Groth	Chromatin Dynamics During DNA Replication and Uncharacterized Replication Factors determined by Nascent Chromatin Capture (NCC) Proteomics	NA	NA	NA	NA	NA	NA	NA	NA	NA	NA	NA	NA	NCBI	Alabert, Constance; Bukowski-Wills, Jimi-Carlo; Lee, Sung-Bau; Kustatscher, Georg; Nakamura, Kyosuke; Alves, Flavia de Lima; Menard, Patrice; Mejlvang, Jakob; Rappsilber, Juri; Groth, Anja			Chromatin Dynamics During DNA Replication and Uncharacterized Replication Factors determined by Nascent Chromatin Capture (NCC) Proteomics	NA	NA	NA	NA	NA	NA	NA	NA	NA	NA	NA	NA	NA	NA	NA	NA	NA	NA	NA	NA	Nat Cell Biol. Author manuscript; available in PMC 2015 January 5.Published in final edited form as: Nat Cell Biol. 2014 March; 16(3): 281???293. Published online 2014 February 23. doi:??10.1038/ncb2918	PMC4283098	Alabert, Constance; Bukowski-Wills, Jimi-Carlo; Lee, Sung-Bau; Kustatscher, Georg; Nakamura, Kyosuke; Alves, Flavia de Lima; Menard, Patrice; Mejlvang, Jakob; Rappsilber, Juri; Groth, Anja	NA	NA	NA	NA	NA	NA	NA
NA	NA	NA	NA	NA	NA	NA	NA	NA	NA	NA	NA	NA	NA	NA	Ovid	Alacam, Alev; Bani, Mehmet			Mesiodens as a risk factor in treatment of trauma cases.[Report]	NA	NA	NA	NA	NA	NA	NA	NA	NA	NA	NA	NA	NA	NA	NA	NA	NA	NA	NA	NA	NA	NA	NA	Journals@Ovid Full Text	00130465-200904000-00025.	Alacam, Alev; Bani, Mehmet	Mesiodens as a risk factor in treatment of trauma cases.[Report]	Dental Traumatology. 25(2):e25-e31, April 2009.	NA	E-ONLY CASE REPORTS.
NA	NA	NA	NA	NA	NA	NA	NA	NA	NA	NA	NA	NA	NA	NA	Ovid	Alahyane, Nadia **; Brien, Donald C.; Coe, Brian C.; Stroman, Patrick W.; Munoz, Douglas P. *			Developmental improvements in voluntary control of behavior: Effect of preparation in the fronto-parietal network?.[Article]	NA	NA	NA	NA	NA	NA	NA	NA	NA	NA	NA	NA	NA	NA	NA	NA	NA	NA	NA	NA	NA	NA	NA	Journals@Ovid Full Text	00042393-201409001-00011.	Alahyane, Nadia **; Brien, Donald C.; Coe, Brian C.; Stroman, Patrick W.; Munoz, Douglas P. *	Developmental improvements in voluntary control of behavior: Effect of preparation in the fronto-parietal network?.[Article]	Neuroimage. 98 (Supplement C):103-117, September 2014.	NA	Articles.
NA	NA	NA	NA	NA	NA	NA	NA	NA	NA	NA	NA	NA	NA	NA	Ovid	Alam, Catharina 1; Valkonen, Suvi 1; Palagani, Vindhya 1; Jalava, Jari 2; Eerola, Erkki 1; Hanninen, Arno 1,			Inflammatory Tendencies and Overproduction of IL-17 in the Colon of Young NOD Mice Are Counteracted With Diet Change.[Miscellaneous Article]	NA	NA	NA	NA	NA	NA	NA	NA	NA	NA	NA	NA	NA	NA	NA	NA	NA	NA	NA	NA	NA	NA	NA	Journals@Ovid Full Text	00003439-201009000-00020.	Alam, Catharina 1; Valkonen, Suvi 1; Palagani, Vindhya 1; Jalava, Jari 2; Eerola, Erkki 1; Hanninen, Arno 1,	Inflammatory Tendencies and Overproduction of IL-17 in the Colon of Young NOD Mice Are Counteracted With Diet Change.[Miscellaneous Article]	Diabetes. 59(9):2237-2246, September 2010.	NA	Immunology and Transplantation.
NA	NA	NA	NA	NA	NA	NA	NA	NA	NA	NA	NA	NA	NA	NA	Ovid	ALAM, M. Rajibul 1; HAQ, Syed Atiqul 2; MAJUMDER, M. Mahabubul Islam 3; DAS, Shankar Narayan 1; ALAM, M. N. 1			Methotrexate versus chloroquine in the treatment of rheumatoid arthritis.[Article]	NA	NA	NA	NA	NA	NA	NA	NA	NA	NA	NA	NA	NA	NA	NA	NA	NA	NA	NA	NA	NA	NA	NA	Journals@Ovid Full Text	00134376-200306010-00007.	ALAM, M. Rajibul 1; HAQ, Syed Atiqul 2; MAJUMDER, M. Mahabubul Islam 3; DAS, Shankar Narayan 1; ALAM, M. N. 1	Methotrexate versus chloroquine in the treatment of rheumatoid arthritis.[Article]	APLAR Journal of Rheumatology. 6(1):26-31, 2003.	NA	ORIGINAL ARTICLES.
NA	NA	NA	NA	NA	NA	NA	NA	NA	NA	NA	NA	NA	NA	NA	Ovid	Alam, Tahsin A.; Qureshi, Tas			New frontiers in colorectal cancer surgery.[Article]	NA	NA	NA	NA	NA	NA	NA	NA	NA	NA	NA	NA	NA	NA	NA	NA	NA	NA	NA	NA	NA	NA	NA	Journals@Ovid Full Text	01371635-201206000-00009.	Alam, Tahsin A.; Qureshi, Tas	New frontiers in colorectal cancer surgery.[Article]	Innovait. 5(6):340-344, May 21, 2012.	NA	Clinical Article.
NA	NA	NA	NA	NA	NA	NA	NA	NA	NA	NA	NA	NA	NA	NA	Ovid	Alanne, Soili 1; Laitinen, Kirsi 1; Soderlund, Riitta 1; Paavilainen, Eija 1			Mothers' perceptions of factors affecting their abilities to care for infants with allergy.[Miscellaneous Article]	NA	NA	NA	NA	NA	NA	NA	NA	NA	NA	NA	NA	NA	NA	NA	NA	NA	NA	NA	NA	NA	NA	NA	Journals@Ovid Full Text	00019038-201201000-00019.	Alanne, Soili 1; Laitinen, Kirsi 1; Soderlund, Riitta 1; Paavilainen, Eija 1	Mothers' perceptions of factors affecting their abilities to care for infants with allergy.[Miscellaneous Article]	Journal of Clinical Nursing. 21(1-2):170-179, January 2012.	NA	PARENTAL CONCERNS.
NA	NA	NA	NA	NA	NA	NA	NA	NA	NA	NA	NA	NA	NA	NA	Ovid	Albaghdadi, Mazen 1; Gheorghiade, Mihai 1,2,3; Pitt, Bertram 4,*			Mineralocorticoid receptor antagonism: therapeutic potential in acute heart failure syndromes.[Review]	NA	NA	NA	NA	NA	NA	NA	NA	NA	NA	NA	NA	NA	NA	NA	NA	NA	NA	NA	NA	NA	NA	NA	Journals@Ovid Full Text	00003628-201132210-00017.	Albaghdadi, Mazen 1; Gheorghiade, Mihai 1,2,3; Pitt, Bertram 4,*	Mineralocorticoid receptor antagonism: therapeutic potential in acute heart failure syndromes.[Review]	European Heart Journal. 32(21):2626-2633, November 2011.	NA	REVIEWS.
NA	NA	NA	NA	NA	NA	NA	NA	NA	NA	NA	NA	NA	NA	NA	Ovid	Albano L.			Review of clinical trials on minimization and interruption of calcineurin inhibitors (CNIs) and protocols without CNIs in the transplantation of different organs (kidney, heart, and liver).	NA	NA	NA	NA	NA	NA	NA	NA	NA	NA	NA	NA	NA	NA	NA	NA	NA	NA	NA	NA	NA	NA	NA	Embase	2010054162	Albano L.	Review of clinical trials on minimization and interruption of calcineurin inhibitors (CNIs) and protocols without CNIs in the transplantation of different organs (kidney, heart, and liver).	Nephrologie et Therapeutique. 5 (SUPPL. 6) (pp S371-S378), 2009. Date of Publication: December 2009.	NA	NA
NA	NA	NA	NA	NA	NA	NA	NA	NA	NA	NA	NA	NA	NA	NA	Ovid	Albano, Laetitia 1; Berthoux, Francois 2; Moal, Marie-Christine 3; Rostaing, Lionel 4; Legendre, Christophe 5; Genin, Robert 6; Toupance, Olivier 7; Moulin, Bruno 8; Merville, Pierre 9; Rerolle, Jean-Philippe 10; Bayle, Francois 11; Westeel, Pierre Francois 12; Glotz, Denis 13; Kossari, Niloufar 14; Lefrancois, Nicole 15; Charpentier, Bernard 16,17; Blanc, Anne-Sandrine 18; Di Giambattista, Fabie…			Incidence of Delayed Graft Function and Wound Healing Complications After Deceased-Donor Kidney Transplantation Is not Affected by De Novo Everolimus.[Miscellaneous Article]	NA	NA	NA	NA	NA	NA	NA	NA	NA	NA	NA	NA	NA	NA	NA	NA	NA	NA	NA	NA	NA	NA	NA	Journals@Ovid Full Text	00007890-200907150-00012.	Albano, Laetitia 1; Berthoux, Francois 2; Moal, Marie-Christine 3; Rostaing, Lionel 4; Legendre, Christophe 5; Genin, Robert 6; Toupance, Olivier 7; Moulin, Bruno 8; Merville, Pierre 9; Rerolle, Jean-Philippe 10; Bayle, Francois 11; Westeel, Pierre Francois 12; Glotz, Denis 13; Kossari, Niloufar 14; Lefrancois, Nicole 15; Charpentier, Bernard 16,17; Blanc, Anne-Sandrine 18; Di Giambattista, Fabie…	Incidence of Delayed Graft Function and Wound Healing Complications After Deceased-Donor Kidney Transplantation Is not Affected by De Novo Everolimus.[Miscellaneous Article]	Transplantation. 88(1):69-76, July 15, 2009.	NA	Clinical and Translational Research.
NA	NA	NA	NA	NA	NA	NA	NA	NA	NA	NA	NA	NA	NA	NA	Ovid	Albers, Anne C. MSN, RN, CPNP			Should There Be Laws Mandating Seatbelts in All School Buses?: PRO.[Editorial]	NA	NA	NA	NA	NA	NA	NA	NA	NA	NA	NA	NA	NA	NA	NA	NA	NA	NA	NA	NA	NA	NA	NA	Journals@Ovid Full Text	00005721-200101000-00002.	Albers, Anne C. MSN, RN, CPNP	Should There Be Laws Mandating Seatbelts in All School Buses?: PRO.[Editorial]	MCN, American Journal of Maternal Child Nursing. 26(1):8, January/February 2001.	NA	Second Opinion.
NA	Albertsen, PC	Feasibility study: Watchful waiting for localized low to intermediate grade prostate carcinoma with selective delayed intervention based on prostate specific antigen, histological and/or clinical progression - Editorial comment	JOURNAL OF UROLOGY	NA	NA	NA	NA	NA	NA	NA	46	NA	NA	NA	WebOfKnowledge	Albertsen, PC			Feasibility study: Watchful waiting for localized low to intermediate grade prostate carcinoma with selective delayed intervention based on prostate specific antigen, histological and/or clinical progression - Editorial comment	NA	NA	NA	NA	NA	4		203	NA		NA	0022-5347	NA	NA	NA	NA	NA	NA	NA	NA	NA	NA	NA	NA	NA	NA	NA	NA	NA	NA
NA	Jeanine Albu, Nancy Sohler, Brenda Matti-Orozco, Jordan Sill, Daniel Baxter, Gary Burke, Edwin Young	Expansion of Electronic Health Record-Based Screening, Prevention, and Management of Diabetes in New York City	NA	NA	NA	NA	NA	NA	NA	NA	NA	NA	NA	NA	NCBI	Albu, Jeanine; Sohler, Nancy; Matti-Orozco, Brenda; Sill, Jordan; Baxter, Daniel; Burke, Gary; Young, Edwin			Expansion of Electronic Health Record-Based Screening, Prevention, and Management of Diabetes in New York City	NA	NA	NA	NA	NA	NA	NA	NA	NA	NA	NA	NA	NA	NA	NA	NA	NA	NA	NA	NA	Prev Chronic Dis. 2013; 10: E13. Published online 2013 January 31. doi:??10.5888/pcd10.120148	PMC3562173	Albu, Jeanine; Sohler, Nancy; Matti-Orozco, Brenda; Sill, Jordan; Baxter, Daniel; Burke, Gary; Young, Edwin	NA	NA	NA	NA	NA	NA	NA
NA	NA	NA	NA	NA	NA	NA	NA	NA	NA	NA	NA	NA	NA	NA	Ovid	Aldekhayel, Salah MD, MEd *; Aljaaly, Hattan MD *; Fouda-Neel, Omar MD, FRCSC *; Shararah, Abdul-Wahab MD, PharmD *; Zaid, Waleed Suliman DDS, MSc +; Gilardino, Mirko MD, MSc *			Evolving Trends in the Management of Orbital Floor Fractures.[Article]	NA	NA	NA	NA	NA	NA	NA	NA	NA	NA	NA	NA	NA	NA	NA	NA	NA	NA	NA	NA	NA	NA	NA	Journals@Ovid Full Text	00001665-201401000-00053.	Aldekhayel, Salah MD, MEd *; Aljaaly, Hattan MD *; Fouda-Neel, Omar MD, FRCSC *; Shararah, Abdul-Wahab MD, PharmD *; Zaid, Waleed Suliman DDS, MSc +; Gilardino, Mirko MD, MSc *	Evolving Trends in the Management of Orbital Floor Fractures.[Article]	Journal of Craniofacial Surgery. 25(1):258-261, January 2014.	NA	Original Articles.
NA	NA	NA	NA	NA	NA	NA	NA	NA	NA	NA	NA	NA	NA	NA	Ovid	Aldington, S. 1; Stratton, I. M. 1; Taylor, D. J. 2; Scanlon, P. H. 1,2			NHS DIABETIC EYE SCREENING PROGRAMME ON-LINE TEST AND TRAINING (TAT): PAST, PRESENT AND FUTURE.[Abstract]	NA	NA	NA	NA	NA	NA	NA	NA	NA	NA	NA	NA	NA	NA	NA	NA	NA	NA	NA	NA	NA	NA	NA	Journals@Ovid Full Text	00008369-201304220-00063.	Aldington, S. 1; Stratton, I. M. 1; Taylor, D. J. 2; Scanlon, P. H. 1,2	NHS DIABETIC EYE SCREENING PROGRAMME ON-LINE TEST AND TRAINING (TAT): PAST, PRESENT AND FUTURE.[Abstract]	European Journal of Ophthalmology. 23(3):458, April 22, 2013.	NA	Poster Sessions.
NA	NA	NA	NA	NA	NA	NA	NA	NA	NA	NA	NA	NA	NA	NA	Ovid	Aldrich D.S. Helbig L.C.			A sequential procedure for implementing a computer-based information system.	NA	NA	NA	NA	NA	NA	NA	NA	NA	NA	NA	NA	NA	NA	NA	NA	NA	NA	NA	NA	NA	NA	NA	Embase	1986246278	Aldrich D.S. Helbig L.C.	A sequential procedure for implementing a computer-based information system.	Journal of the American Dietetic Association. 86 (9) (pp 1228-1231), 1986. Date of Publication: 1986.	NA	NA
NA	Margarita Alegr?¥a, Thomas McGuire, Mildred Vera, Glorisa Canino, Leida Mat?¥as, Jos?” Calder?n	Changes in Access to Mental Health Care Among the Poor and Nonpoor: Results From the Health Care Reform in Puerto Rico	NA	NA	NA	NA	NA	NA	NA	NA	NA	NA	NA	NA	NCBI	Alegr?¥a, Margarita; McGuire, Thomas; Vera, Mildred; Canino, Glorisa; Mat?¥as, Leida; Calder?n, Jos?”			Changes in Access to Mental Health Care Among the Poor and Nonpoor: Results From the Health Care Reform in Puerto Rico	NA	NA	NA	NA	NA	NA	NA	NA	NA	NA	NA	NA	NA	NA	NA	NA	NA	NA	NA	NA	Am J Public Health. 2001 September; 91(9): 1431???1434.	PMC1446799	Alegr?¥a, Margarita; McGuire, Thomas; Vera, Mildred; Canino, Glorisa; Mat?¥as, Leida; Calder?n, Jos?”	NA	NA	NA	NA	NA	NA	NA
NA	NA	NA	NA	NA	NA	NA	NA	NA	NA	NA	NA	NA	NA	NA	Ovid	Alexi-Meskishvili, Vladimir V. MD, PhD *; Bottcher, Wolfgang ECCP			The First Closure of the Persistent Ductus Arteriosus.[Miscellaneous Article]	NA	NA	NA	NA	NA	NA	NA	NA	NA	NA	NA	NA	NA	NA	NA	NA	NA	NA	NA	NA	NA	NA	NA	Journals@Ovid Full Text	01438437-201007000-00092.	Alexi-Meskishvili, Vladimir V. MD, PhD *; Bottcher, Wolfgang ECCP	The First Closure of the Persistent Ductus Arteriosus.[Miscellaneous Article]	Annals of Thoracic Surgery,The. 90(1):349-356, July 2010.	NA	Our surgical heritage.
NA	NA	NA	NA	NA	NA	NA	NA	NA	NA	NA	NA	NA	NA	NA	Ovid	Alhashimi, R. 1,2; Mannocci, F. 2; Foxton, R. 2; Deb, S. 1			Fabrication and characterization of polymer composites for endodontic use.[Article]	NA	NA	NA	NA	NA	NA	NA	NA	NA	NA	NA	NA	NA	NA	NA	NA	NA	NA	NA	NA	NA	NA	NA	Journals@Ovid Full Text	00004310-201406000-00011.	Alhashimi, R. 1,2; Mannocci, F. 2; Foxton, R. 2; Deb, S. 1	Fabrication and characterization of polymer composites for endodontic use.[Article]	International Endodontic Journal. 47(6):574-582, June 2014.	NA	Original Article: Original Scientific Articles.
NA	NA	NA	NA	NA	NA	NA	NA	NA	NA	NA	NA	NA	NA	NA	Ovid	Ali, I.; Costescu, C.; Vicic, M.; Dempsey, J. F.; Williamson, J. F. a			Dependence of radiochromic film optical density post-exposure kinetics on dose and dose fractionation.[Miscellaneous Article]	NA	NA	NA	NA	NA	NA	NA	NA	NA	NA	NA	NA	NA	NA	NA	NA	NA	NA	NA	NA	NA	NA	NA	Journals@Ovid Full Text	00005706-200308000-00002.	Ali, I.; Costescu, C.; Vicic, M.; Dempsey, J. F.; Williamson, J. F. a	Dependence of radiochromic film optical density post-exposure kinetics on dose and dose fractionation.[Miscellaneous Article]	Medical Physics. 30(8):1958-1967, August 2003.	NA	RADIATION THERAPY PHYSICS.
NA	Ali, Khatami; Gunnar, Aus; Jan-Erik, Damber; Hans, Lija; Par, Lodding; Jonas, Hugosson	PSA doubling time predicts the outcome after active surveillance in screening-detected prostate cancer: Results from the European randomized study of screening for prostate cancer, Sweden section	INTERNATIONAL JOURNAL OF CANCER	NA	NA	NA	NA	NA	NA	NA	25	NA	NA	NA	WebOfKnowledge	Ali, Khatami; Gunnar, Aus; Jan-Erik, Damber; Hans, Lija; Par, Lodding; Jonas, Hugosson			PSA doubling time predicts the outcome after active surveillance in screening-detected prostate cancer: Results from the European randomized study of screening for prostate cancer, Sweden section	NA	NA	NA	NA	NA	1		218	NA		NA	0020-7136	NA	NA	NA	NA	NA	NA	NA	NA	NA	NA	NA	NA	NA	NA	NA	NA	NA	NA
NA	Sheikhi Rahim Ali, Heidari Mohammad, Shahbazi Sara	Evaluation of the relationship between pelvic fracture and abdominal compartment syndrome in traumatic patients	NA	NA	NA	NA	NA	NA	NA	NA	NA	NA	NA	NA	NCBI	Ali, Sheikhi Rahim; Mohammad, Heidari; Sara, Shahbazi			Evaluation of the relationship between pelvic fracture and abdominal compartment syndrome in traumatic patients	NA	NA	NA	NA	NA	NA	NA	NA	NA	NA	NA	NA	NA	NA	NA	NA	NA	NA	NA	NA	J Emerg Trauma Shock. 2013 Jul-Sep; 6(3): 176???179. doi:??10.4103/0974-2700.115330	PMC3746438	Ali, Sheikhi Rahim; Mohammad, Heidari; Sara, Shahbazi	NA	NA	NA	NA	NA	NA	NA
NA	NA	NA	NA	NA	NA	NA	NA	NA	NA	NA	NA	NA	NA	NA	Ovid	Ali, Suhail S. 1,*; Chandrashekar, Sudha Rao 2; Singh, Meenu 3; Bansal, R. K. 4; Sharma, Deepika R 1; Arora, Deepankar 1			A Multicenter, Prospective, Open-Label, Non-Comparative Study to Evaluate the Immunogenicity and Tolerance of a New, Fully Liquid Pentavalent Vaccine (DTwP-HepB-Hib Vaccine).[Article]	NA	NA	NA	NA	NA	NA	NA	NA	NA	NA	NA	NA	NA	NA	NA	NA	NA	NA	NA	NA	NA	NA	NA	Journals@Ovid Full Text	01698939-200707000-00002.	Ali, Suhail S. 1,*; Chandrashekar, Sudha Rao 2; Singh, Meenu 3; Bansal, R. K. 4; Sharma, Deepika R 1; Arora, Deepankar 1	A Multicenter, Prospective, Open-Label, Non-Comparative Study to Evaluate the Immunogenicity and Tolerance of a New, Fully Liquid Pentavalent Vaccine (DTwP-HepB-Hib Vaccine).[Article]	Human Vaccines & Immunotherapeutics. 3(4):116-121, July 2007.	NA	Research Paper.
NA	NA	NA	NA	NA	NA	NA	NA	NA	NA	NA	NA	NA	NA	NA	Ovid	Aliabadi A. Grommer M. Cochrane A. Salameh O. Zuckermann A.			Induction therapy in heart transplantation: Where are we now?.	NA	NA	NA	NA	NA	NA	NA	NA	NA	NA	NA	NA	NA	NA	NA	NA	NA	NA	NA	NA	NA	NA	NA	Embase	2013377984	Aliabadi A. Grommer M. Cochrane A. Salameh O. Zuckermann A.	Induction therapy in heart transplantation: Where are we now?.	Transplant International. 26 (7) (pp 684-695), 2013. Date of Publication: July 2013.	NA	NA
NA	Muktar H Aliyu, Meridith Blevins, Carolyn M Audet, Bryan E Shepherd, Adiba Hassan, Obinna Onwujekwe, Usman I Gebi, Marcia L Kalish, Mary Lou Lindegren, Sten H Vermund, C. William Wester	Optimizing PMTCT Service Delivery in Rural North Central Nigeria: Protocol and Design for a Cluster Randomized Study	NA	NA	NA	NA	NA	NA	NA	NA	NA	NA	NA	NA	NCBI	Aliyu, Muktar H; Blevins, Meridith; Audet, Carolyn M; Shepherd, Bryan E; Hassan, Adiba; Onwujekwe, Obinna; Gebi, Usman I; Kalish, Marcia L; Lindegren, Mary Lou; Vermund, Sten H; Wester, C. William			Optimizing PMTCT Service Delivery in Rural North Central Nigeria: Protocol and Design for a Cluster Randomized Study	NA	NA	NA	NA	NA	NA	NA	NA	NA	NA	NA	NA	NA	NA	NA	NA	NA	NA	NA	NA	Contemp Clin Trials. Author manuscript; available in PMC 2014 September 1.Published in final edited form as: Contemp Clin Trials. 2013 September; 36(1): 187???197. Published online 2013 June 29. doi:??10.1016/j.cct.2013.06.013	PMC3786261	Aliyu, Muktar H; Blevins, Meridith; Audet, Carolyn M; Shepherd, Bryan E; Hassan, Adiba; Onwujekwe, Obinna; Gebi, Usman I; Kalish, Marcia L; Lindegren, Mary Lou; Vermund, Sten H; Wester, C. William	NA	NA	NA	NA	NA	NA	NA
NA	NA	NA	NA	NA	NA	NA	NA	NA	NA	NA	NA	NA	NA	NA	Ovid	Aljateeli, Manar 1,2; Koticha, Tapan 1; Bashutski, Jill 1; Sugai, James V. 1; Braun, Thomas M. 3; Giannobile, William V. 1; Wang, Hom-Lay 1			Surgical periodontal therapy with and without initial scaling and root planing in the management of chronic periodontitis: a randomized clinical trial.[Miscellaneous Article]	NA	NA	NA	NA	NA	NA	NA	NA	NA	NA	NA	NA	NA	NA	NA	NA	NA	NA	NA	NA	NA	NA	NA	Journals@Ovid Full Text	00004699-201407000-00007.	Aljateeli, Manar 1,2; Koticha, Tapan 1; Bashutski, Jill 1; Sugai, James V. 1; Braun, Thomas M. 3; Giannobile, William V. 1; Wang, Hom-Lay 1	Surgical periodontal therapy with and without initial scaling and root planing in the management of chronic periodontitis: a randomized clinical trial.[Miscellaneous Article]	Journal of Clinical Periodontology. 41(7):693-700, July 2014.	NA	Randomized Clinical Trial: Periodontal Therapy.
NA	NA	NA	NA	NA	NA	NA	NA	NA	NA	NA	NA	NA	NA	NA	Ovid	Allan, Robert			From the Editor.[Editorial]	NA	NA	NA	NA	NA	NA	NA	NA	NA	NA	NA	NA	NA	NA	NA	NA	NA	NA	NA	NA	NA	NA	NA	Journals@Ovid Full Text	00129491-201008000-00001.	Allan, Robert	From the Editor.[Editorial]	Clinical Medicine. 10(4):315, July 2010.	NA	Editorials.
NA	NA	NA	NA	NA	NA	NA	NA	NA	NA	NA	NA	NA	NA	NA	Ovid	Allcott, Hunt 1*; Mullainathan, Sendhil 2			Behavior and Energy Policy.[Miscellaneous Article]	NA	NA	NA	NA	NA	NA	NA	NA	NA	NA	NA	NA	NA	NA	NA	NA	NA	NA	NA	NA	NA	NA	NA	Journals@Ovid Full Text	00007529-201003050-00003.	Allcott, Hunt 1*; Mullainathan, Sendhil 2	Behavior and Energy Policy.[Miscellaneous Article]	Science. 327(5970):1204-1205, March 5, 2010.	NA	POLICY FORUM: ENERGY.
NA	Claire Allcutt, Mary-Rose Sweeney	An exploration of knowledge, attitudes and advice given by health professionals to parents in Ireland about the introduction of solid foods. A pilot study	NA	NA	NA	NA	NA	NA	NA	NA	NA	NA	NA	NA	NCBI	Allcutt, Claire; Sweeney, Mary-Rose			An exploration of knowledge, attitudes and advice given by health professionals to parents in Ireland about the introduction of solid foods. A pilot study	NA	NA	NA	NA	NA	NA	NA	NA	NA	NA	NA	NA	NA	NA	NA	NA	NA	NA	NA	NA	BMC Public Health. 2010; 10: 201. Published online 2010 April 21. doi:??10.1186/1471-2458-10-201	PMC2868001	Allcutt, Claire; Sweeney, Mary-Rose	NA	NA	NA	NA	NA	NA	NA
NA	NA	NA	NA	NA	NA	NA	NA	NA	NA	NA	NA	NA	NA	NA	Ovid	Allen M. Svetaz M. Hurtado G.A. Yon K.J. Okuyemi K. Marczak M.			Utilizing CBPR to develop and pilot a parent-based substance use prevention program for Latino youth.	NA	NA	NA	NA	NA	NA	NA	NA	NA	NA	NA	NA	NA	NA	NA	NA	NA	NA	NA	NA	NA	NA	NA	Embase	70079512	Allen M. Svetaz M. Hurtado G.A. Yon K.J. Okuyemi K. Marczak M.	Utilizing CBPR to develop and pilot a parent-based substance use prevention program for Latino youth.	Journal of Adolescent Health. Conference: Society for Adolescent Medicine Annual Meeting - Adolescent Clinical Care: Integrating Art and Science Toronto, ON Canada. Conference Start: 20100407 Conference End: 20100410. Conference Publication: (var.pagings). 46 (2 SUPPL. 1) (pp S60), 2010. Date of Publication: 2010.	NA	NA
NA	NA	NA	NA	NA	NA	NA	NA	NA	NA	NA	NA	NA	NA	NA	Ovid	Allen, C. W. 1,2; Campbell, D. E. 1,2; Kemp, A. S. 1,2			Food allergy: Is strict avoidance the only answer?.[Article]	NA	NA	NA	NA	NA	NA	NA	NA	NA	NA	NA	NA	NA	NA	NA	NA	NA	NA	NA	NA	NA	NA	NA	Journals@Ovid Full Text	00012984-200908000-00004.	Allen, C. W. 1,2; Campbell, D. E. 1,2; Kemp, A. S. 1,2	Food allergy: Is strict avoidance the only answer?.[Article]	Pediatric Allergy & Immunology. 20(5):415-422, August 2009.	NA	Original Articles.
NA	Elizabeth N Allen, Francesca Little, Tunisio Camba, Yasmin Cassam, Jaishree Raman, Andrew Boulle, Karen I Barnes	Efficacy of sulphadoxine-pyrimethamine with or without artesunate for the treatment of uncomplicated Plasmodium falciparum malaria in southern Mozambique: a randomized controlled trial	NA	NA	NA	NA	NA	NA	NA	NA	NA	NA	NA	NA	NCBI	Allen, Elizabeth N; Little, Francesca; Camba, Tunisio; Cassam, Yasmin; Raman, Jaishree; Boulle, Andrew; Barnes, Karen I			Efficacy of sulphadoxine-pyrimethamine with or without artesunate for the treatment of uncomplicated Plasmodium falciparum malaria in southern Mozambique: a randomized controlled trial	NA	NA	NA	NA	NA	NA	NA	NA	NA	NA	NA	NA	NA	NA	NA	NA	NA	NA	NA	NA	Malar J. 2009; 8: 141. Published online 2009 June 26. doi:??10.1186/1475-2875-8-141	PMC2709115	Allen, Elizabeth N; Little, Francesca; Camba, Tunisio; Cassam, Yasmin; Raman, Jaishree; Boulle, Andrew; Barnes, Karen I	NA	NA	NA	NA	NA	NA	NA
NA	NA	NA	NA	NA	NA	NA	NA	NA	NA	NA	NA	NA	NA	NA	Ovid	ALLEN, J. MA, RGN			Between the trapezes-making the most of change.[Article]	NA	NA	NA	NA	NA	NA	NA	NA	NA	NA	NA	NA	NA	NA	NA	NA	NA	NA	NA	NA	NA	NA	NA	Journals@Ovid Full Text	00019040-199601000-00007.	ALLEN, J. MA, RGN	Between the trapezes-making the most of change.[Article]	Journal of Nursing Management. 4(1):39-43, January 1996.	NA	Article.
NA	NA	NA	NA	NA	NA	NA	NA	NA	NA	NA	NA	NA	NA	NA	Ovid	Allen, Jessica A MPH, MSW 1; Longenecker, Holly B MSPH 2; Perrine, Cria G PhD 1; Scanlon, Kelley S PhD, RD 1			Baby-Friendly Hospital Practices and Birth Costs.[Article]	NA	NA	NA	NA	NA	NA	NA	NA	NA	NA	NA	NA	NA	NA	NA	NA	NA	NA	NA	NA	NA	NA	NA	Journals@Ovid Full Text	00001857-201312000-00004.	Allen, Jessica A MPH, MSW 1; Longenecker, Holly B MSPH 2; Perrine, Cria G PhD 1; Scanlon, Kelley S PhD, RD 1	Baby-Friendly Hospital Practices and Birth Costs.[Article]	Birth. 40(4):221-226, December 2013.	NA	ARTICLES.
NA	NA	NA	NA	NA	NA	NA	NA	NA	NA	NA	NA	NA	NA	NA	Ovid	Allen, K. J. 1,2,3; O'Hehir, R. E. 4,5			The evolution of oral immunotherapy for the treatment of peanut allergy.[Editorial]	NA	NA	NA	NA	NA	NA	NA	NA	NA	NA	NA	NA	NA	NA	NA	NA	NA	NA	NA	NA	NA	NA	NA	Journals@Ovid Full Text	00002739-201109000-00002.	Allen, K. J. 1,2,3; O'Hehir, R. E. 4,5	The evolution of oral immunotherapy for the treatment of peanut allergy.[Editorial]	Clinical & Experimental Allergy. 41(9):1172-1174, September 2011.	NA	EDITORIALS.
NA	NA	NA	NA	NA	NA	NA	NA	NA	NA	NA	NA	NA	NA	NA	Ovid	Allen, Katrina J. MD, PhD * + ++; Martin, Pamela E. BSc (Hons) + ++			Clinical Aspects of Pediatric Food Allergy and Failed Oral Immune Tolerance.[Review]	NA	NA	NA	NA	NA	NA	NA	NA	NA	NA	NA	NA	NA	NA	NA	NA	NA	NA	NA	NA	NA	NA	NA	Journals@Ovid Full Text	00004836-201007000-00008.	Allen, Katrina J. MD, PhD * + ++; Martin, Pamela E. BSc (Hons) + ++	Clinical Aspects of Pediatric Food Allergy and Failed Oral Immune Tolerance.[Review]	Journal of Clinical Gastroenterology. 44(6):391-401, July 2010.	NA	ALIMENTARY TRACT: Clinical Reviews.
NA	Michele L Allen, Diego Garcia-Huidobro, G Ali Hurtado, Rose Allen, Cynthia S Davey, Jean L Forster, Monica Hurtado, Katia Lopez-Petrovich, Mary Marczak, Ursula Reynoso, Laura Trebs, Mar?¥a Veronica Svetaz	Immigrant family skills-building to prevent tobacco use in Latino youth: study protocol for a community-based participatory randomized controlled trial	NA	NA	NA	NA	NA	NA	NA	NA	NA	NA	NA	NA	NCBI	Allen, Michele L; Garcia-Huidobro, Diego; Hurtado, G Ali; Allen, Rose; Davey, Cynthia S; Forster, Jean L; Hurtado, Monica; Lopez-Petrovich, Katia; Marczak, Mary; Reynoso, Ursula; Trebs, Laura; Svetaz, Mar?¥a Veronica			Immigrant family skills-building to prevent tobacco use in Latino youth: study protocol for a community-based participatory randomized controlled trial	NA	NA	NA	NA	NA	NA	NA	NA	NA	NA	NA	NA	NA	NA	NA	NA	NA	NA	NA	NA	Trials. 2012; 13: 242. Published online 2012 December 19. doi:??10.1186/1745-6215-13-242	PMC3543344	Allen, Michele L; Garcia-Huidobro, Diego; Hurtado, G Ali; Allen, Rose; Davey, Cynthia S; Forster, Jean L; Hurtado, Monica; Lopez-Petrovich, Katia; Marczak, Mary; Reynoso, Ursula; Trebs, Laura; Svetaz, Mar?¥a Veronica	NA	NA	NA	NA	NA	NA	NA
NA	NA	NA	NA	NA	NA	NA	NA	NA	NA	NA	NA	NA	NA	NA	Ovid	Alli S. Djoukhadar I. Stockley H. Goddard T. Patankar T. Hassan A.			Is it time to evaluate primary mechanical thrombectomy in acute basilar artery occlusion? A single centre experience.	NA	NA	NA	NA	NA	NA	NA	NA	NA	NA	NA	NA	NA	NA	NA	NA	NA	NA	NA	NA	NA	NA	NA	Embase	71280576	Alli S. Djoukhadar I. Stockley H. Goddard T. Patankar T. Hassan A.	Is it time to evaluate primary mechanical thrombectomy in acute basilar artery occlusion? A single centre experience.	International Journal of Stroke. Conference: UK Stroke Forum 2013 Conference North Yorkshire United Kingdom. Conference Start: 20131203 Conference End: 20131205. Conference Publication: (var.pagings). 8 (pp 58), 2013. Date of Publication: December 2013.	NA	NA
NA	NA	NA	NA	NA	NA	NA	NA	NA	NA	NA	NA	NA	NA	NA	Ovid	Alli, Oluseun Jr 1; Holmes, David *,2			Evaluation of the WATCHMAN left atrial appendage closure device.[Miscellaneous Article]	NA	NA	NA	NA	NA	NA	NA	NA	NA	NA	NA	NA	NA	NA	NA	NA	NA	NA	NA	NA	NA	NA	NA	Journals@Ovid Full Text	01222846-201411000-00002.	Alli, Oluseun Jr 1; Holmes, David *,2	Evaluation of the WATCHMAN left atrial appendage closure device.[Miscellaneous Article]	Expert Review of Medical Devices. 11(6):541-551, November 2014.	NA	Device Profiles.
NA	NA	NA	NA	NA	NA	NA	NA	NA	NA	NA	NA	NA	NA	NA	Ovid	Allicock M. Campbell M.K. Valle C.G. Barlow J.N. Carr C. Meier A. Gizlice Z.			Evaluating the implementation of peer counseling in a church-based dietary intervention for African Americans.	NA	NA	NA	NA	NA	NA	NA	NA	NA	NA	NA	NA	NA	NA	NA	NA	NA	NA	NA	NA	NA	NA	NA	Embase	2010460477	Allicock M. Campbell M.K. Valle C.G. Barlow J.N. Carr C. Meier A. Gizlice Z.	Evaluating the implementation of peer counseling in a church-based dietary intervention for African Americans.	Patient Education and Counseling. 81 (1) (pp 37-42), 2010. Date of Publication: October 2010.	NA	NA
NA	NA	NA	NA	NA	NA	NA	NA	NA	NA	NA	NA	NA	NA	NA	Ovid	Allicock, Marlyn PhD 1,*; Campbell, Marci K. PhD, MPH, RD 1; Valle, Carmina G. MPH 1; Carr, Carol MA 2; Resnicow, Ken PhD 3; Gizlice, Ziya PhD 4			Evaluating the Dissemination of Body & Soul, an Evidence-based Fruit and Vegetable Intake Intervention: Challenges for Dissemination and Implementation Research.[Article]	NA	NA	NA	NA	NA	NA	NA	NA	NA	NA	NA	NA	NA	NA	NA	NA	NA	NA	NA	NA	NA	NA	NA	Journals@Ovid Full Text	00134373-201211000-00010.	Allicock, Marlyn PhD 1,*; Campbell, Marci K. PhD, MPH, RD 1; Valle, Carmina G. MPH 1; Carr, Carol MA 2; Resnicow, Ken PhD 3; Gizlice, Ziya PhD 4	Evaluating the Dissemination of Body & Soul, an Evidence-based Fruit and Vegetable Intake Intervention: Challenges for Dissemination and Implementation Research.[Article]	Journal of Nutrition Education & Behavior. 44(6):530-538, November 2012.	NA	Research Article.
NA	Susannah Allison, Jose A. Bauermeister, Sheana Bull, Marguerita Lightfoot, Brian Mustanski, Ross Shegog, Deb Levine	The Intersection of Youth, Technology, and New Media with Sexual Health: Moving the Research Agenda Forward	NA	NA	NA	NA	NA	NA	NA	NA	NA	NA	NA	NA	NCBI	Allison, Susannah; Bauermeister, Jose A.; Bull, Sheana; Lightfoot, Marguerita; Mustanski, Brian; Shegog, Ross; Levine, Deb			The Intersection of Youth, Technology, and New Media with Sexual Health: Moving the Research Agenda Forward	NA	NA	NA	NA	NA	NA	NA	NA	NA	NA	NA	NA	NA	NA	NA	NA	NA	NA	NA	NA	J Adolesc Health. Author manuscript; available in PMC 2015 February 16.Published in final edited form as: J Adolesc Health. 2012 September; 51(3): 207???212. doi:??10.1016/j.jadohealth.2012.06.012	PMC4330086	Allison, Susannah; Bauermeister, Jose A.; Bull, Sheana; Lightfoot, Marguerita; Mustanski, Brian; Shegog, Ross; Levine, Deb	NA	NA	NA	NA	NA	NA	NA
NA	NA	NA	NA	NA	NA	NA	NA	NA	NA	NA	NA	NA	NA	NA	Ovid	Alm, B 1; Aberg, N 1; Erdes, L 3; Mollborg, P 2; Pettersson, R 4; Norvenius, S G 1; Goksor, E 1; Wennergren, G 1			Early introduction of fish decreases the risk of eczema in infants.[Article]	NA	NA	NA	NA	NA	NA	NA	NA	NA	NA	NA	NA	NA	NA	NA	NA	NA	NA	NA	NA	NA	NA	NA	Journals@Ovid Full Text	00000740-200901000-00005.	Alm, B 1; Aberg, N 1; Erdes, L 3; Mollborg, P 2; Pettersson, R 4; Norvenius, S G 1; Goksor, E 1; Wennergren, G 1	Early introduction of fish decreases the risk of eczema in infants.[Article]	Archives of Disease in Childhood. 94(1):11-15, January 2009.	NA	Original article.
NA	NA	NA	NA	NA	NA	NA	NA	NA	NA	NA	NA	NA	NA	NA	Ovid	Alm, Bernt 1; Goksor, Emma 1; Thengilsdottir, Hrefna 1; Pettersson, Rolf 2; Mollborg, Per 3; Norvenius, Gunnar 1; Erdes, Laslo 4; Aberg, Nils 1; Wennergren, Goran 1			Early protective and risk factors for allergic rhinitis at age 41/2 yr.[Article]	NA	NA	NA	NA	NA	NA	NA	NA	NA	NA	NA	NA	NA	NA	NA	NA	NA	NA	NA	NA	NA	NA	NA	Journals@Ovid Full Text	00012984-201106000-00010.	Alm, Bernt 1; Goksor, Emma 1; Thengilsdottir, Hrefna 1; Pettersson, Rolf 2; Mollborg, Per 3; Norvenius, Gunnar 1; Erdes, Laslo 4; Aberg, Nils 1; Wennergren, Goran 1	Early protective and risk factors for allergic rhinitis at age 41/2 yr.[Article]	Pediatric Allergy & Immunology. 22(4):398-404, June 2011.	NA	ORIGINAL ARTICLES: Upper airways and specific immunotherapy: ORIGINAL ARTICLE.
NA	NA	NA	NA	NA	NA	NA	NA	NA	NA	NA	NA	NA	NA	NA	Ovid	ALMEIDA DE OLIVEIRA, EDILEUSA APARECIDA MS, RN; KOMURA HOGA, LUIZA AKIKO PhD, RN			The Process of Seeking and Undergoing Surgical Contraception: An Ethnographic Study in a Brazilian Community.[Miscellaneous]	NA	NA	NA	NA	NA	NA	NA	NA	NA	NA	NA	NA	NA	NA	NA	NA	NA	NA	NA	NA	NA	NA	NA	Journals@Ovid Full Text	00002045-200501000-00001.	ALMEIDA DE OLIVEIRA, EDILEUSA APARECIDA MS, RN; KOMURA HOGA, LUIZA AKIKO PhD, RN	The Process of Seeking and Undergoing Surgical Contraception: An Ethnographic Study in a Brazilian Community.[Miscellaneous]	Journal of Transcultural Nursing. 16(1):5-14, January 2005.	NA	RESEARCH DEPARTMENT.
NA	NA	NA	NA	NA	NA	NA	NA	NA	NA	NA	NA	NA	NA	NA	Ovid	Almhdawi K.A. Mathiowetz V. White M.			Multidisciplinary clinical rehabilitation effects of occupational therapy task-oriented approach in upper extremity poststroke rehabilitation.	NA	NA	NA	NA	NA	NA	NA	NA	NA	NA	NA	NA	NA	NA	NA	NA	NA	NA	NA	NA	NA	NA	NA	Embase	71646394	Almhdawi K.A. Mathiowetz V. White M.	Multidisciplinary clinical rehabilitation effects of occupational therapy task-oriented approach in upper extremity poststroke rehabilitation.	International Journal of Stroke. Conference: 9th World Stroke Congress Istanbul Turkey. Conference Start: 20141022 Conference End: 20141025. Conference Publication: (var.pagings). 9 (pp 217), 2014. Date of Publication: October 2014.	NA	NA
2012-99140-043	NA	NA	NA	NA	NA	ProQuest Information & Learning	NA	NA	NA	NA	73	NA	NA	NA	PsycINFO	Almhdawi, Khader			Effects of Occupational Therapy Task-Oriented approach in Upper Extremity post-stroke rehabilitation.	*Cerebrovascular Accidents; *Occupational Therapy; *Rehabilitation; Therapeutic Processes	NA	Effects of Occupational Therapy Task-Oriented approach in Upper Extremity post-stroke rehabilitation.	NA	Almhdawi, Khader	1-B	237	NA	2012	US	NA	0419-4217(Print)	There is a need for effective Upper Extremity (UE) post-stroke rehabilitation approaches. The Occupational Therapy Task-Oriented (TO) approach was described early in the nineties of the past century. Many of the TO principles were supported in the literature. However, the TO as a whole was only evaluated in case studies. This study aimed to evaluate the functional and the impairment effects of th…	*Cerebrovascular Accidents; *Occupational Therapy; *Rehabilitation; Therapeutic Processes	NA	NA	NA	NA	NA	NA	NA	NA	NA	NA	NA	NA	NA	NA	NA	NA
NA	Ramzi A. Alsallaq, Jared M. Baeten, Connie L. Celum, James P. Hughes, Laith J. Abu-Raddad, Ruanne V. Barnabas, Timothy B. Hallett	Understanding the Potential Impact of a Combination HIV Prevention Intervention in a Hyper-Endemic Community	NA	NA	NA	NA	NA	NA	NA	NA	NA	NA	NA	NA	NCBI	Alsallaq, Ramzi A.; Baeten, Jared M.; Celum, Connie L.; Hughes, James P.; Abu-Raddad, Laith J.; Barnabas, Ruanne V.; Hallett, Timothy B.			Understanding the Potential Impact of a Combination HIV Prevention Intervention in a Hyper-Endemic Community	NA	NA	NA	NA	NA	NA	NA	NA	NA	NA	NA	NA	NA	NA	NA	NA	NA	NA	NA	NA	PLoS One. 2013; 8(1): e54575. Published online 2013 January 23. doi:??10.1371/journal.pone.0054575	PMC3553021	Alsallaq, Ramzi A.; Baeten, Jared M.; Celum, Connie L.; Hughes, James P.; Abu-Raddad, Laith J.; Barnabas, Ruanne V.; Hallett, Timothy B.	NA	NA	NA	NA	NA	NA	NA
NA	NA	NA	NA	NA	NA	NA	NA	NA	NA	NA	NA	NA	NA	NA	Ovid	Alsoufi, Bahaaldin MD a,*; Manlhiot, Cedric BSc b; Mahle, William T. MD c; Kogon, Brian MD a; Border, William L. MBChB, MPH c; Cuadrado, Angel MD c; Vincent, Robert MD c; McCrindle, Brian W. MD, MPH b; Kanter, Kirk MD a			Low-weight infants are at increased mortality risk after palliative or corrective cardiac surgery.[Miscellaneous Article]	NA	NA	NA	NA	NA	NA	NA	NA	NA	NA	NA	NA	NA	NA	NA	NA	NA	NA	NA	NA	NA	NA	NA	Journals@Ovid Full Text	00005362-201412000-00017.	Alsoufi, Bahaaldin MD a,*; Manlhiot, Cedric BSc b; Mahle, William T. MD c; Kogon, Brian MD a; Border, William L. MBChB, MPH c; Cuadrado, Angel MD c; Vincent, Robert MD c; McCrindle, Brian W. MD, MPH b; Kanter, Kirk MD a	Low-weight infants are at increased mortality risk after palliative or corrective cardiac surgery.[Miscellaneous Article]	Journal of Thoracic & Cardiovascular Surgery. 148(6):2508-2514e1, December 2014.	NA	Congenital heart disease.
NA	NA	NA	NA	NA	NA	NA	NA	NA	NA	NA	NA	NA	NA	NA	Ovid	Altenburger, M. J. a; Schirrmeister, J. F. a; Wrbas, K.-T. a; Klasser, M. b; Hellwig, E. a			Fluoride Uptake and Remineralisation of Enamel Lesions after Weekly Application of Differently Concentrated Fluoride Gels.[Article]	NA	NA	NA	NA	NA	NA	NA	NA	NA	NA	NA	NA	NA	NA	NA	NA	NA	NA	NA	NA	NA	NA	NA	Journals@Ovid Full Text	00002860-200808000-00013.	Altenburger, M. J. a; Schirrmeister, J. F. a; Wrbas, K.-T. a; Klasser, M. b; Hellwig, E. a	Fluoride Uptake and Remineralisation of Enamel Lesions after Weekly Application of Differently Concentrated Fluoride Gels.[Article]	Caries Research. 42(4):312-318, August 2008.	NA	Original Paper.
NA	NA	NA	NA	NA	NA	NA	NA	NA	NA	NA	NA	NA	NA	NA	Ovid	Altenburger, Markus J. 1; Schirrmeister, JOrg F. 1; Lussi, Adrian 2; Klasser, Manfred 3; Hellwig, Elmar 1			In situ fluoride retention and remineralization of incipient carious lesions after the application of different concentrations of fluoride.[Article]	NA	NA	NA	NA	NA	NA	NA	NA	NA	NA	NA	NA	NA	NA	NA	NA	NA	NA	NA	NA	NA	NA	NA	Journals@Ovid Full Text	00043643-200902000-00009.	Altenburger, Markus J. 1; Schirrmeister, JOrg F. 1; Lussi, Adrian 2; Klasser, Manfred 3; Hellwig, Elmar 1	In situ fluoride retention and remineralization of incipient carious lesions after the application of different concentrations of fluoride.[Article]	European Journal of Oral Sciences. 117(1):58-63, February 2009.	NA	Original Article.
NA	NA	NA	NA	NA	NA	NA	NA	NA	NA	NA	NA	NA	NA	NA	Ovid	Althof V. van Haaren P. Westendorp R. Nuver T. Kramer D. Ikink M. Bel A. Minken A.			A quality assurance tool for helical tomotherapy using a step-wedge phantom and the on-board MVCT detector.	NA	NA	NA	NA	NA	NA	NA	NA	NA	NA	NA	NA	NA	NA	NA	NA	NA	NA	NA	NA	NA	NA	NA	Embase	22231210	Althof V. van Haaren P. Westendorp R. Nuver T. Kramer D. Ikink M. Bel A. Minken A.	A quality assurance tool for helical tomotherapy using a step-wedge phantom and the on-board MVCT detector.	Journal of applied clinical medical physics / American College of Medical Physics. 13 (1) (pp 3585), 2012. Date of Publication: 2012.	NA	NA
NA	NA	NA	NA	NA	NA	NA	NA	NA	NA	NA	NA	NA	NA	NA	Ovid	Altintas S.H. Yildirim T. Kayipmaz S. Usumez A.			Evaluation of the radiopacity of luting cements by digital radiography.	NA	NA	NA	NA	NA	NA	NA	NA	NA	NA	NA	NA	NA	NA	NA	NA	NA	NA	NA	NA	NA	NA	NA	Embase	23107317	Altintas S.H. Yildirim T. Kayipmaz S. Usumez A.	Evaluation of the radiopacity of luting cements by digital radiography.	Journal of Prosthodontics. 22 (4) (pp 282-286), 2013. Date of Publication: June 2013.	NA	NA
NA	NA	NA	NA	NA	NA	NA	NA	NA	NA	NA	NA	NA	NA	NA	Ovid	Alva H. Mercado-Uribe H. Rodriguez-Villafuerte M. Brandan M.E.			The use of a reflective scanner to study radiochronic film response.	NA	NA	NA	NA	NA	NA	NA	NA	NA	NA	NA	NA	NA	NA	NA	NA	NA	NA	NA	NA	NA	NA	NA	Embase	2002307732	Alva H. Mercado-Uribe H. Rodriguez-Villafuerte M. Brandan M.E.	The use of a reflective scanner to study radiochronic film response.	Physics in Medicine and Biology. 47 (16) (pp 2925-2933), 2002. Date of Publication: 21 Aug 2002.	NA	NA
NA	Robert E. Alvarez	Estimator for photon counting energy selective x-ray imaging with multibin pulse height analysis	NA	NA	NA	NA	NA	NA	NA	NA	NA	NA	NA	NA	NCBI	Alvarez, Robert E.			Estimator for photon counting energy selective x-ray imaging with multibin pulse height analysis	NA	NA	NA	NA	NA	NA	NA	NA	NA	NA	NA	NA	NA	NA	NA	NA	NA	NA	NA	NA	Med Phys. 2011 May; 38(5): 2324???2334. Published online 2011 April 25. doi:??10.1118/1.3570658	PMC3098892	Alvarez, Robert E.	NA	NA	NA	NA	NA	NA	NA
NA	NA	NA	NA	NA	NA	NA	NA	NA	NA	NA	NA	NA	NA	NA	Ovid	Alvarez, Robert E. a; Seibert, J. Anthony; Thompson, Stephen K.			Comparison of dual energy detector system performance.[Miscellaneous Article]	NA	NA	NA	NA	NA	NA	NA	NA	NA	NA	NA	NA	NA	NA	NA	NA	NA	NA	NA	NA	NA	NA	NA	Journals@Ovid Full Text	00005706-200403000-00017.	Alvarez, Robert E. a; Seibert, J. Anthony; Thompson, Stephen K.	Comparison of dual energy detector system performance.[Miscellaneous Article]	Medical Physics. 31(3):556-565, March 2004.	NA	RADIATION IMAGING PHYSICS.
NA	NA	NA	NA	NA	NA	NA	NA	NA	NA	NA	NA	NA	NA	NA	Ovid	Amaechi, B. T. a; Porteous, N. a; Ramalingam, K. a; Mensinkai, P. K. a; Ccahuana Vasquez, R. A. a; Sadeghpour, A. b; Nakamoto, T. b			Remineralization of Artificial Enamel Lesions by Theobromine.[Article]	NA	NA	NA	NA	NA	NA	NA	NA	NA	NA	NA	NA	NA	NA	NA	NA	NA	NA	NA	NA	NA	NA	NA	Journals@Ovid Full Text	00002860-201309000-00006.	Amaechi, B. T. a; Porteous, N. a; Ramalingam, K. a; Mensinkai, P. K. a; Ccahuana Vasquez, R. A. a; Sadeghpour, A. b; Nakamoto, T. b	Remineralization of Artificial Enamel Lesions by Theobromine.[Article]	Caries Research. 47(5):399-405, September 2013.	NA	Original Paper.
NA	NA	NA	NA	NA	NA	NA	NA	NA	NA	NA	NA	NA	NA	NA	Ovid	Amalberti, Rene MD, PhD; Auroy, Yves MD; Berwick, Don MD, MPP; Barach, Paul MD, MPH			Five System Barriers to Achieving Ultrasafe Health Care.[Miscellaneous Article]	NA	NA	NA	NA	NA	NA	NA	NA	NA	NA	NA	NA	NA	NA	NA	NA	NA	NA	NA	NA	NA	NA	NA	Journals@Ovid Full Text	00000605-200505030-00012.	Amalberti, Rene MD, PhD; Auroy, Yves MD; Berwick, Don MD, MPP; Barach, Paul MD, MPH	Five System Barriers to Achieving Ultrasafe Health Care.[Miscellaneous Article]	Annals of Internal Medicine. 142(9):756-764, May 3, 2005.	NA	Improving Patient Care.
NA	NA	NA	NA	NA	NA	NA	NA	NA	NA	NA	NA	NA	NA	NA	Ovid	Amaral, Andre Carlos Kajdacsy-Balla 1,2; Wunsch, Hannah 3,4			Rapid response teams: a diagnostic dilemma.[Editorial]	NA	NA	NA	NA	NA	NA	NA	NA	NA	NA	NA	NA	NA	NA	NA	NA	NA	NA	NA	NA	NA	NA	NA	Journals@Ovid Full Text	01438068-201203000-00001.	Amaral, Andre Carlos Kajdacsy-Balla 1,2; Wunsch, Hannah 3,4	Rapid response teams: a diagnostic dilemma.[Editorial]	BMJ Quality & Safety. 21(3):177-178, March 2012.	NA	Editorial.
NA	F. A. Amaral, D. Sachs, V. V. Costa, C. T. Fagundes, D. Cisalpino, T. M. Cunha, S. H. Ferreira, F. Q. Cunha, T. A. Silva, J. R. Nicoli, L. Q. Vieira, D. G. Souza, M. M. Teixeira	Commensal microbiota is fundamental for the development of inflammatory pain	NA	NA	NA	NA	NA	NA	NA	NA	NA	NA	NA	NA	NCBI	Amaral, F. A.; Sachs, D.; Costa, V. V.; Fagundes, C. T.; Cisalpino, D.; Cunha, T. M.; Ferreira, S. H.; Cunha, F. Q.; Silva, T. A.; Nicoli, J. R.; Vieira, L. Q.; Souza, D. G.; Teixeira, M. M.			Commensal microbiota is fundamental for the development of inflammatory pain	NA	NA	NA	NA	NA	NA	NA	NA	NA	NA	NA	NA	NA	NA	NA	NA	NA	NA	NA	NA	Proc Natl Acad Sci U S A. 2008 February 12; 105(6): 2193???2197. Published online 2008 February 11. doi:??10.1073/pnas.0711891105	PMC2538897	Amaral, F. A.; Sachs, D.; Costa, V. V.; Fagundes, C. T.; Cisalpino, D.; Cunha, T. M.; Ferreira, S. H.; Cunha, F. Q.; Silva, T. A.; Nicoli, J. R.; Vieira, L. Q.; Souza, D. G.; Teixeira, M. M.	NA	NA	NA	NA	NA	NA	NA
NA	NA	NA	NA	NA	NA	NA	NA	NA	NA	NA	NA	NA	NA	NA	Ovid	Amaranto, Daniel J. BA; Abbas, Farah MS; Krantz, Seth MD; Pearce, William H. MD; Wang, Edward PhD; Kibbe, Melina R. MD			An evaluation of gender and racial disparity in the decision to treat surgically arterial disease.[Article]	NA	NA	NA	NA	NA	NA	NA	NA	NA	NA	NA	NA	NA	NA	NA	NA	NA	NA	NA	NA	NA	NA	NA	Journals@Ovid Full Text	00005397-200912000-00018.	Amaranto, Daniel J. BA; Abbas, Farah MS; Krantz, Seth MD; Pearce, William H. MD; Wang, Edward PhD; Kibbe, Melina R. MD	An evaluation of gender and racial disparity in the decision to treat surgically arterial disease.[Article]	Journal of Vascular Surgery. 50(6):1340-1347, December 2009.	NA	Clinical research study.
NA	Ambati, Marreddy; Gerasimov, Tymofiy; De Lorenzis, Laura	A review on phase-field models of brittle fracture and a new fast hybrid formulation	COMPUTATIONAL MECHANICS	NA	NA	NA	NA	NA	NA	NA	55	NA	NA	NA	WebOfKnowledge	Ambati, Marreddy; Gerasimov, Tymofiy; De Lorenzis, Laura			A review on phase-field models of brittle fracture and a new fast hybrid formulation	NA	NA	NA	NA	NA	2		510	NA		NA	0178-7675	NA	NA	NA	NA	NA	NA	NA	NA	NA	NA	NA	NA	NA	NA	NA	NA	NA	NA
NA	Aaron M. Ambrus, Brandon N. Nicolay, Vanya I. Rasheva, Richard J. Suckling, Maxim V. Frolov	dE2F2-Independent Rescue of Proliferation in Cells Lacking an Activator dE2F1	NA	NA	NA	NA	NA	NA	NA	NA	NA	NA	NA	NA	NCBI	Ambrus, Aaron M.; Nicolay, Brandon N.; Rasheva, Vanya I.; Suckling, Richard J.; Frolov, Maxim V.			dE2F2-Independent Rescue of Proliferation in Cells Lacking an Activator dE2F1	NA	NA	NA	NA	NA	NA	NA	NA	NA	NA	NA	NA	NA	NA	NA	NA	NA	NA	NA	NA	Mol Cell Biol. 2007 December; 27(24): 8561???8570. Published online 2007 October 8. doi:??10.1128/MCB.01068-07	PMC2169406	Ambrus, Aaron M.; Nicolay, Brandon N.; Rasheva, Vanya I.; Suckling, Richard J.; Frolov, Maxim V.	NA	NA	NA	NA	NA	NA	NA
NA	NA	NA	NA	NA	NA	NA	NA	NA	NA	NA	NA	NA	NA	NA	Ovid	Amer-Wahlin, I a; Dekker, S b			Fetal monitoring-a risky business for the unborn and for clinicians.[Editorial]	NA	NA	NA	NA	NA	NA	NA	NA	NA	NA	NA	NA	NA	NA	NA	NA	NA	NA	NA	NA	NA	NA	NA	Journals@Ovid Full Text	00134415-200807000-00002.	Amer-Wahlin, I a; Dekker, S b	Fetal monitoring-a risky business for the unborn and for clinicians.[Editorial]	BJOG: An International Journal of Obstetrics & Gynaecology. 115(8):935-937, July 2008.	NA	Commentary.
NA	NA	NA	NA	NA	NA	NA	NA	NA	NA	NA	NA	NA	NA	NA	Ovid	Amico, Janet A *,a,b; Vollmer, Regis R a; Karam, Joseph R a; Lee, Paul R c; Li, Xia a; Koenig, James I d; McCarthy, Margaret M c			Centrally administered oxytocin elicits exaggerated grooming in oxytocin null mice.[Article]	NA	NA	NA	NA	NA	NA	NA	NA	NA	NA	NA	NA	NA	NA	NA	NA	NA	NA	NA	NA	NA	NA	NA	Journals@Ovid Full Text	00006489-200406000-00019.	Amico, Janet A *,a,b; Vollmer, Regis R a; Karam, Joseph R a; Lee, Paul R c; Li, Xia a; Koenig, James I d; McCarthy, Margaret M c	Centrally administered oxytocin elicits exaggerated grooming in oxytocin null mice.[Article]	Pharmacology, Biochemistry & Behavior. 78(2):333-339, June 2004.	NA	Articles.
NA	NA	NA	NA	NA	NA	NA	NA	NA	NA	NA	NA	NA	NA	NA	Ovid	Amin, Reshma MD, MSc 1,2; Sayal, Priya 1; Syed, Faiza RRT 1; Chaves, Arlene MN, NP 1; Moraes, Theo J. MD, PhD 1,2; MacLusky, Ian MBBS 3,4			Pediatric long-term home mechanical ventilation: Twenty years of follow-up from one Canadian center.[Article]	NA	NA	NA	NA	NA	NA	NA	NA	NA	NA	NA	NA	NA	NA	NA	NA	NA	NA	NA	NA	NA	NA	NA	Journals@Ovid Full Text	01445490-201408000-00012.	Amin, Reshma MD, MSc 1,2; Sayal, Priya 1; Syed, Faiza RRT 1; Chaves, Arlene MN, NP 1; Moraes, Theo J. MD, PhD 1,2; MacLusky, Ian MBBS 3,4	Pediatric long-term home mechanical ventilation: Twenty years of follow-up from one Canadian center.[Article]	Pediatric Pulmonology. 49(8):816-824, August 2014.	NA	Original Article: Other.
NA	Amirouche, A.; Mouzali, M.; Watts, D. C.	Radiopacity evaluation of bis-GMA/TEGDMA/opaque mineral filler dental composites	JOURNAL OF APPLIED POLYMER SCIENCE	NA	NA	NA	NA	NA	NA	NA	6	NA	NA	NA	WebOfKnowledge	Amirouche, A.; Mouzali, M.; Watts, D. C.			Radiopacity evaluation of bis-GMA/TEGDMA/opaque mineral filler dental composites	NA	NA	NA	NA	NA	3		195	NA		NA	0021-8995	NA	NA	NA	NA	NA	NA	NA	NA	NA	NA	NA	NA	NA	NA	NA	NA	NA	NA
NA	NA	NA	NA	NA	NA	NA	NA	NA	NA	NA	NA	NA	NA	NA	Ovid	Amland, Robert C.; Dean, Bonnie B.; Yu, Hsing-Ting; Ryan, Hugh; Orsund, Timothy; Hackman, Jeffrey L.; Roberts, Shauna R.			Computerized Clinical Decision Support to Prevent Venous Thromboembolism among Hospitalized Patients: Proximal Outcomes from a Multiyear Quality Improvement Project.[Article]	NA	NA	NA	NA	NA	NA	NA	NA	NA	NA	NA	NA	NA	NA	NA	NA	NA	NA	NA	NA	NA	NA	NA	Journals@Ovid Full Text	01445442-900000000-99995.	Amland, Robert C.; Dean, Bonnie B.; Yu, Hsing-Ting; Ryan, Hugh; Orsund, Timothy; Hackman, Jeffrey L.; Roberts, Shauna R.	Computerized Clinical Decision Support to Prevent Venous Thromboembolism among Hospitalized Patients: Proximal Outcomes from a Multiyear Quality Improvement Project.[Article]	Journal For Healthcare Quality.	Publish Ahead of Print, published online before print, 24 February 2014	Original Articles: PDF Only.
NA	Elske Ammenwerth, Carola Iller, Cornelia Mahler	IT-adoption and the interaction of task, technology and individuals: a fit framework and a case study	NA	NA	NA	NA	NA	NA	NA	NA	NA	NA	NA	NA	NCBI	Ammenwerth, Elske; Iller, Carola; Mahler, Cornelia			IT-adoption and the interaction of task, technology and individuals: a fit framework and a case study	NA	NA	NA	NA	NA	NA	NA	NA	NA	NA	NA	NA	NA	NA	NA	NA	NA	NA	NA	NA	BMC Med Inform Decis Mak. 2006; 6: 3. Published online 2006 January 9. doi:??10.1186/1472-6947-6-3	PMC1352353	Ammenwerth, Elske; Iller, Carola; Mahler, Cornelia	NA	NA	NA	NA	NA	NA	NA
NA	NA	NA	NA	NA	NA	NA	NA	NA	NA	NA	NA	NA	NA	NA	Ovid	Ammerman, Alice DrPH, RD; Corbie-Smith, Giselle MD, MSCR; St. George, Diane Marie M. PhD; Washington, Chanetta MPH; Weathers, Beneta MPH; Jackson-Christian, Bethany PhD, RD			Research Expectations Among African American Church Leaders in the PRAISE! Project: A Randomized Trial Guided by Community-Based Participatory Research.[Miscellaneous]	NA	NA	NA	NA	NA	NA	NA	NA	NA	NA	NA	NA	NA	NA	NA	NA	NA	NA	NA	NA	NA	NA	NA	Journals@Ovid Full Text	00000469-200310000-00026.	Ammerman, Alice DrPH, RD; Corbie-Smith, Giselle MD, MSCR; St. George, Diane Marie M. PhD; Washington, Chanetta MPH; Weathers, Beneta MPH; Jackson-Christian, Bethany PhD, RD	Research Expectations Among African American Church Leaders in the PRAISE! Project: A Randomized Trial Guided by Community-Based Participatory Research.[Miscellaneous]	American Journal of Public Health. ELIMINATING HEALTH INEQUALITIES. 93(10):1720-1727, October 2003.	NA	Research and Practice.
NA	Joseph J Amon	Dangerous medicines: Unproven AIDS cures and counterfeit antiretroviral drugs	NA	NA	NA	NA	NA	NA	NA	NA	NA	NA	NA	NA	NCBI	Amon, Joseph J			Dangerous medicines: Unproven AIDS cures and counterfeit antiretroviral drugs	NA	NA	NA	NA	NA	NA	NA	NA	NA	NA	NA	NA	NA	NA	NA	NA	NA	NA	NA	NA	Global Health. 2008; 4: 5. Published online 2008 February 27. doi:??10.1186/1744-8603-4-5	PMC2291042	Amon, Joseph J	NA	NA	NA	NA	NA	NA	NA
NA	NA	NA	NA	NA	NA	NA	NA	NA	NA	NA	NA	NA	NA	NA	Ovid	Amoroso, Giovanni; Laarman, Gert-Jan; Kiemeneij, Ferdinand			Overview of the transradial approach in percutaneous coronary intervention.[Review]	NA	NA	NA	NA	NA	NA	NA	NA	NA	NA	NA	NA	NA	NA	NA	NA	NA	NA	NA	NA	NA	NA	NA	Journals@Ovid Full Text	01244665-200704000-00002.	Amoroso, Giovanni; Laarman, Gert-Jan; Kiemeneij, Ferdinand	Overview of the transradial approach in percutaneous coronary intervention.[Review]	Journal of Cardiovascular Medicine. 8(4):230-237, April 2007.	NA	Review articles.
NA	Amouzou, Agbessi; Morris, Saul; Moulton, Lawrence H; Mukanga, David	Assessing the impact of integrated community case management (iCCM) programs on child mortality: Review of early results and lessons learned in sub-Saharan Africa.	Journal of global health	NA	NA	NA	NA	NA	NA	NA	42	NA	25520801	NA	WebOfKnowledge	Amouzou, Agbessi; Morris, Saul; Moulton, Lawrence H; Mukanga, David			Assessing the impact of integrated community case management (iCCM) programs on child mortality: Review of early results and lessons learned in sub-Saharan Africa.	NA	NA	NA	NA	NA	2		276	NA		NA	2047-2978	NA	NA	NA	NA	NA	NA	NA	NA	NA	NA	NA	NA	NA	NA	NA	NA	NA	NA
NA	NA	NA	NA	NA	NA	NA	NA	NA	NA	NA	NA	NA	NA	NA	Ovid	Amudhan, Senthil 1; Mani, Kalaivani 2; Rai, Sanjay K 1; S Pandav, Chandrakant 1; Krishnan, Anand 1,*			Effectiveness of demand and supply side interventions in promoting institutional deliveries - a quasi-experimental trial from rural north India.[Miscellaneous Article]	NA	NA	NA	NA	NA	NA	NA	NA	NA	NA	NA	NA	NA	NA	NA	NA	NA	NA	NA	NA	NA	NA	NA	Journals@Ovid Full Text	00004345-201306000-00022.	Amudhan, Senthil 1; Mani, Kalaivani 2; Rai, Sanjay K 1; S Pandav, Chandrakant 1; Krishnan, Anand 1,*	Effectiveness of demand and supply side interventions in promoting institutional deliveries - a quasi-experimental trial from rural north India.[Miscellaneous Article]	International Journal of Epidemiology. 42(3):769-780, June 2013.	NA	Birth.
NA	NA	NA	NA	NA	NA	NA	NA	NA	NA	NA	NA	NA	NA	NA	Ovid	Amundsen, B.; Gallon, L.; Kaufman, D.; Walker, J.; Leventhal, J.			Steroid Avoidance and Delayed Introduction of Tacrolimus (Tac) Using Alemtuzumab Induction in Kidney Transplantation: Five Year Follow-Up: Abstract# 237.[Abstract]	NA	NA	NA	NA	NA	NA	NA	NA	NA	NA	NA	NA	NA	NA	NA	NA	NA	NA	NA	NA	NA	NA	NA	Journals@Ovid Full Text	00024798-200705001-00237.	Amundsen, B.; Gallon, L.; Kaufman, D.; Walker, J.; Leventhal, J.	Steroid Avoidance and Delayed Introduction of Tacrolimus (Tac) Using Alemtuzumab Induction in Kidney Transplantation: Five Year Follow-Up: Abstract# 237.[Abstract]	American Journal of Transplantation. 7 (Supplement 2):208, May 2007.	NA	AMERICAN TRANSPLANT CONGRESS 2007 ABSTRACT: Kidney Immunosuppression: CNI Minimization - Avoidance Protocols.
NA	NA	NA	NA	NA	NA	NA	NA	NA	NA	NA	NA	NA	NA	NA	Ovid	Anagnostopoulos, Petros V. MD *			Palliative and corrective surgery in low-weight infants is associated with an increased mortality risk: How can we do better?.[Miscellaneous]	NA	NA	NA	NA	NA	NA	NA	NA	NA	NA	NA	NA	NA	NA	NA	NA	NA	NA	NA	NA	NA	NA	NA	Journals@Ovid Full Text	00005362-201412000-00018.	Anagnostopoulos, Petros V. MD *	Palliative and corrective surgery in low-weight infants is associated with an increased mortality risk: How can we do better?.[Miscellaneous]	Journal of Thoracic & Cardiovascular Surgery. 148(6):2515-2516, December 2014.	NA	Congenital heart disease.
NA	NA	NA	NA	NA	NA	NA	NA	NA	NA	NA	NA	NA	NA	NA	Ovid	Anagnostou K. Clark A.			The management of peanut allergy.	NA	NA	NA	NA	NA	NA	NA	NA	NA	NA	NA	NA	NA	NA	NA	NA	NA	NA	NA	NA	NA	NA	NA	Embase	2014610947	Anagnostou K. Clark A.	The management of peanut allergy.	Archives of Disease in Childhood. 100 (1) (pp 68-72), 2015. Date of Publication: 01 Jan 2015.	NA	NA
NA	Ashwin N Ananthakrishnan, Emily L McGinley	Treatment of Intra-abdominal Abscesses in Crohn???s Disease ??? A Nationwide Analysis of Patterns and Outcomes of Care	NA	NA	NA	NA	NA	NA	NA	NA	NA	NA	NA	NA	NCBI	Ananthakrishnan, Ashwin N; McGinley, Emily L			Treatment of Intra-abdominal Abscesses in Crohn???s Disease ??? A Nationwide Analysis of Patterns and Outcomes of Care	NA	NA	NA	NA	NA	NA	NA	NA	NA	NA	NA	NA	NA	NA	NA	NA	NA	NA	NA	NA	Dig Dis Sci. Author manuscript; available in PMC 2014 July 1.Published in final edited form as: Dig Dis Sci. 2013 July; 58(7): 2013???2018. Published online 2013 February 8. doi:??10.1007/s10620-013-2579-z	PMC3663922	Ananthakrishnan, Ashwin N; McGinley, Emily L	NA	NA	NA	NA	NA	NA	NA
NA	NA	NA	NA	NA	NA	NA	NA	NA	NA	NA	NA	NA	NA	NA	Ovid	Anbeek H.J.			The need for a 'Deltaplan' in health care (Dutch).	NA	NA	NA	NA	NA	NA	NA	NA	NA	NA	NA	NA	NA	NA	NA	NA	NA	NA	NA	NA	NA	NA	NA	Embase	975153722	Anbeek H.J.	The need for a 'Deltaplan' in health care (Dutch).	Unie. 4 (11) (pp 181-185), 1974. Date of Publication: 1974.	NA	NA
NA	NA	NA	NA	NA	NA	NA	NA	NA	NA	NA	NA	NA	NA	NA	Ovid	Andersen J.B. Thorgeirsson S.S.			Genetic profiling of intrahepatic cholangiocarcinoma.	NA	NA	NA	NA	NA	NA	NA	NA	NA	NA	NA	NA	NA	NA	NA	NA	NA	NA	NA	NA	NA	NA	NA	Embase	2012224314	Andersen J.B. Thorgeirsson S.S.	Genetic profiling of intrahepatic cholangiocarcinoma.	Current Opinion in Gastroenterology. 28 (3) (pp 266-272), 2012. Date of Publication: May 2012.	NA	NA
NA	NA	NA	NA	NA	NA	NA	NA	NA	NA	NA	NA	NA	NA	NA	Ovid	Andersen, Berit head of Department of Public Health Programmes 1; Olesen, Frede professor of general practice 2			Screening for Chlamydia trachomatis.[Editorial]	NA	NA	NA	NA	NA	NA	NA	NA	NA	NA	NA	NA	NA	NA	NA	NA	NA	NA	NA	NA	NA	NA	NA	Journals@Ovid Full Text	00002591-201207070-00056.	Andersen, Berit head of Department of Public Health Programmes 1; Olesen, Frede professor of general practice 2	Screening for Chlamydia trachomatis.[Editorial]	BMJ. 345:e4231, July 7, 2012.	NA	Editorials.
2009-99220-209	NA	NA	NA	NA	NA	ProQuest Information & Learning	NA	NA	NA	NA	70	NA	NA	NA	PsycINFO	Andersen, Lena S.			Effectiveness of cognitive-behavioral therapy on the reduction of depression in people infected with HIV/AIDS in South Africa.	*AIDS; *Cognitive Therapy; *Countries; *HIV; Major Depression	NA	Effectiveness of cognitive-behavioral therapy on the reduction of depression in people infected with HIV/AIDS in South Africa.	NA	Andersen, Lena S.	5-B	3159	NA	2009	US	NA	0419-4217(Print)	HIV/AIDS has reached pandemic proportions in South Africa. Due to the increased psychological distress associated with such a diagnosis, people infected with the virus are at greater risk of developing a mental disorder such as depression (Kalichman & Sikkema, 1994). However, few treatment options are available to most of the population in South Africa and few studies of treatment efficacy with H…	*AIDS; *Cognitive Therapy; *Countries; *HIV; Major Depression	NA	NA	NA	NA	NA	NA	NA	NA	NA	NA	NA	NA	NA	NA	NA	NA
NA	NA	NA	NA	NA	NA	NA	NA	NA	NA	NA	NA	NA	NA	NA	Ovid	Andersen, Marit Helen RN, PhD 1,a; Dueland, Svein MD, PhD 1,2,b; Hagness, Morten MD 1,3,c; Vidnes, Tone RN, MSc 1,d; Finstad, Ellen Drolsum RN, MSc 1,e; Wahl, Astrid Klopstad RN, PhD 4,f; Foss, Aksel MD, PhD 1,f			Quality of life following liver transplantation in patients with liver metastases from colorectal carcinoma.[Miscellaneous Article]	NA	NA	NA	NA	NA	NA	NA	NA	NA	NA	NA	NA	NA	NA	NA	NA	NA	NA	NA	NA	NA	NA	NA	Journals@Ovid Full Text	00007245-201212000-00012.	Andersen, Marit Helen RN, PhD 1,a; Dueland, Svein MD, PhD 1,2,b; Hagness, Morten MD 1,3,c; Vidnes, Tone RN, MSc 1,d; Finstad, Ellen Drolsum RN, MSc 1,e; Wahl, Astrid Klopstad RN, PhD 4,f; Foss, Aksel MD, PhD 1,f	Quality of life following liver transplantation in patients with liver metastases from colorectal carcinoma.[Miscellaneous Article]	Scandinavian Journal of Caring Sciences. 26(4):713-719, December 2012.	NA	Empirical Studies.
NA	NA	NA	NA	NA	NA	NA	NA	NA	NA	NA	NA	NA	NA	NA	Ovid	Andersen, Peter Hundevadt			Reflectance spectroscopic analysis of selected experimental dermatological models with emphasis on cutaneous vascular reactions.[Miscellaneous Article]	NA	NA	NA	NA	NA	NA	NA	NA	NA	NA	NA	NA	NA	NA	NA	NA	NA	NA	NA	NA	NA	NA	NA	Journals@Ovid Full Text	00061349-199700001-00001.	Andersen, Peter Hundevadt	Reflectance spectroscopic analysis of selected experimental dermatological models with emphasis on cutaneous vascular reactions.[Miscellaneous Article]	Skin Research & Technology. 3 (Supplement 1):3-58, 1997.	NA	Reflectance Spectroscopic Analysis Of Selected Experimental Dermatological Models With Emphasis On Cutaneous Vascular Reactions.
NA	NA	NA	NA	NA	NA	NA	NA	NA	NA	NA	NA	NA	NA	NA	Ovid	Anderson K. Mattsson O.			Quality assurance in radiographic imaging included in the film marking procedure.	NA	NA	NA	NA	NA	NA	NA	NA	NA	NA	NA	NA	NA	NA	NA	NA	NA	NA	NA	NA	NA	NA	NA	Embase	6869059	Anderson K. Mattsson O.	Quality assurance in radiographic imaging included in the film marking procedure.	Acta radiologica: diagnosis. 24 (1) (pp 63-65), 1983. Date of Publication: 1983.	NA	NA
NA	NA	NA	NA	NA	NA	NA	NA	NA	NA	NA	NA	NA	NA	NA	Ovid	Anderson, A. S.			Dietary interventions in low-income women - issues for UK policy.[Review]	NA	NA	NA	NA	NA	NA	NA	NA	NA	NA	NA	NA	NA	NA	NA	NA	NA	NA	NA	NA	NA	NA	NA	Journals@Ovid Full Text	00094955-200703000-00005.	Anderson, A. S.	Dietary interventions in low-income women - issues for UK policy.[Review]	Nutrition Bulletin. 32(1):15-20, March 2007.	NA	REVIEW.
NA	NA	NA	NA	NA	NA	NA	NA	NA	NA	NA	NA	NA	NA	NA	Ovid	Anderson, Annie S.			Nutrition interventions in women in low-income groups in the UK.[Report]	NA	NA	NA	NA	NA	NA	NA	NA	NA	NA	NA	NA	NA	NA	NA	NA	NA	NA	NA	NA	NA	NA	NA	Journals@Ovid Full Text	00006705-200702000-00004.	Anderson, Annie S.	Nutrition interventions in women in low-income groups in the UK.[Report]	Proceedings of the Nutrition Society. 66(1):25-32, February 2007.	NA	Symposium on 'Nutrition interventions in high-risk groups'.
NA	NA	NA	NA	NA	NA	NA	NA	NA	NA	NA	NA	NA	NA	NA	Ovid	Anderson, Iee Ching W. M.D; Sedaghat, Ahmad R. M.D., Ph.D; McGinley, Brian M. M.D; Redett, Richard J. M.D; Boss, Emily F. M.D; Ishman, Stacey L. M.D., M.P.H			Prevalence and Severity of Obstructive Sleep Apnea and Snoring in Infants With Pierre Robin Sequence.[Article]	NA	NA	NA	NA	NA	NA	NA	NA	NA	NA	NA	NA	NA	NA	NA	NA	NA	NA	NA	NA	NA	NA	NA	Journals@Ovid Full Text	00001594-201109000-00017.	Anderson, Iee Ching W. M.D; Sedaghat, Ahmad R. M.D., Ph.D; McGinley, Brian M. M.D; Redett, Richard J. M.D; Boss, Emily F. M.D; Ishman, Stacey L. M.D., M.P.H	Prevalence and Severity of Obstructive Sleep Apnea and Snoring in Infants With Pierre Robin Sequence.[Article]	Cleft Palate-Craniofacial Journal. 48(5):614-618, September 2011.	NA	Article.
NA	NA	NA	NA	NA	NA	NA	NA	NA	NA	NA	NA	NA	NA	NA	Ovid	Anderson, Linda K. RN, C; Stafford, Cynthia J. RN			The "Big Bang" Implementation: Not for the Faint of Heart.[Article]	NA	NA	NA	NA	NA	NA	NA	NA	NA	NA	NA	NA	NA	NA	NA	NA	NA	NA	NA	NA	NA	NA	NA	Journals@Ovid Full Text	00002771-200201000-00007.	Anderson, Linda K. RN, C; Stafford, Cynthia J. RN	The "Big Bang" Implementation: Not for the Faint of Heart.[Article]	Computers in Nursing. 20(1):14-20, January/February 2002.	NA	ARTICLES: CE.
NA	Louise V. B. Anderson, Keith Davison, Jennifer A. Moss, Isabelle Richard, Michel Fardeau, Fernando M. S. Tom?”, Christoph H?Ýbner, Adriana Lasa, Jaume Colomer, Jacques S. Beckmann	Characterization of Monoclonal Antibodies to Calpain 3 and Protein Expression in Muscle from Patients with Limb-Girdle Muscular Dystrophy Type 2A	NA	NA	NA	NA	NA	NA	NA	NA	NA	NA	NA	NA	NCBI	Anderson, Louise V. B.; Davison, Keith; Moss, Jennifer A.; Richard, Isabelle; Fardeau, Michel; Tom?”, Fernando M. S.; H?Ýbner, Christoph; Lasa, Adriana; Colomer, Jaume; Beckmann, Jacques S.			Characterization of Monoclonal Antibodies to Calpain 3 and Protein Expression in Muscle from Patients with Limb-Girdle Muscular Dystrophy Type 2A	NA	NA	NA	NA	NA	NA	NA	NA	NA	NA	NA	NA	NA	NA	NA	NA	NA	NA	NA	NA	Am J Pathol. 1998 October; 153(4): 1169???1179. doi:??10.1016/S0002-9440(10)65661-1	PMC1853046	Anderson, Louise V. B.; Davison, Keith; Moss, Jennifer A.; Richard, Isabelle; Fardeau, Michel; Tom?”, Fernando M. S.; H?Ýbner, Christoph; Lasa, Adriana; Colomer, Jaume; Beckmann, Jacques S.	NA	NA	NA	NA	NA	NA	NA
NA	NA	NA	NA	NA	NA	NA	NA	NA	NA	NA	NA	NA	NA	NA	Ovid	Anderson, Nancy Lois Ruth PhD, RN, FAAN 1; Lesser, Janna PhD, RN 2; Oscos-Sanchez, Manuel angel MD 3; Pineda, Daniel V. 4; Garcia, Gwyn 5; Mancha, Juan 5			Approaches to Community Nursing Research Partnerships: A Case Example.[Miscellaneous Article]	NA	NA	NA	NA	NA	NA	NA	NA	NA	NA	NA	NA	NA	NA	NA	NA	NA	NA	NA	NA	NA	NA	NA	Journals@Ovid Full Text	00002045-201404000-00003.	Anderson, Nancy Lois Ruth PhD, RN, FAAN 1; Lesser, Janna PhD, RN 2; Oscos-Sanchez, Manuel angel MD 3; Pineda, Daniel V. 4; Garcia, Gwyn 5; Mancha, Juan 5	Approaches to Community Nursing Research Partnerships: A Case Example.[Miscellaneous Article]	Journal of Transcultural Nursing. 25(2):129-136, April 2014.	NA	Theory Department.
NA	NA	NA	NA	NA	NA	NA	NA	NA	NA	NA	NA	NA	NA	NA	Ovid	Anderson, P Chris; Dinulos, James G			Atopic dermatitis and alternative management strategies.[Miscellaneous Article]	NA	NA	NA	NA	NA	NA	NA	NA	NA	NA	NA	NA	NA	NA	NA	NA	NA	NA	NA	NA	NA	NA	NA	Journals@Ovid Full Text	00008480-200902000-00019.	Anderson, P Chris; Dinulos, James G	Atopic dermatitis and alternative management strategies.[Miscellaneous Article]	Current Opinion in Pediatrics. 21(1):131-138, February 2009.	NA	Office pediatrics: Edited by Henry H. Bernstein.
NA	NA	NA	NA	NA	NA	NA	NA	NA	NA	NA	NA	NA	NA	NA	Ovid	Anderson, Ross reader in security engineering			Undermining data privacy in health information : New powers to control patient information contribute nothing to health.[Editorial]	NA	NA	NA	NA	NA	NA	NA	NA	NA	NA	NA	NA	NA	NA	NA	NA	NA	NA	NA	NA	NA	NA	NA	Journals@Ovid Full Text	00002591-200102240-00002.	Anderson, Ross reader in security engineering	Undermining data privacy in health information : New powers to control patient information contribute nothing to health.[Editorial]	BMJ. 322(7284):442-443, February 24, 2001.	NA	Editorials.
NA	NA	NA	NA	NA	NA	NA	NA	NA	NA	NA	NA	NA	NA	NA	Ovid	Anderson, T J 1; Davis, C 3; Alexander, F E 2; Dobson, H M 4; On Behalf Of The Scottish Breast Pathology Coordination Group			Measures of benefit for breast screening from the pathology database for Scotland, 1991-2001.[Article]	NA	NA	NA	NA	NA	NA	NA	NA	NA	NA	NA	NA	NA	NA	NA	NA	NA	NA	NA	NA	NA	NA	NA	Journals@Ovid Full Text	00004696-200309000-00005.	Anderson, T J 1; Davis, C 3; Alexander, F E 2; Dobson, H M 4; On Behalf Of The Scottish Breast Pathology Coordination Group	Measures of benefit for breast screening from the pathology database for Scotland, 1991-2001.[Article]	Journal of Clinical Pathology. 56(9):654-659, September 2003.	NA	ORIGINAL ARTICLE.
NA	NA	NA	NA	NA	NA	NA	NA	NA	NA	NA	NA	NA	NA	NA	Ovid	Andersson M. Hurrell R.F.			Prevention of iron deficiency in infancy, childhood and adolescence.	NA	NA	NA	NA	NA	NA	NA	NA	NA	NA	NA	NA	NA	NA	NA	NA	NA	NA	NA	NA	NA	NA	NA	Embase	2010639763	Andersson M. Hurrell R.F.	Prevention of iron deficiency in infancy, childhood and adolescence.	Annales Nestle. 68 (3) (pp 120-131), 2010. Date of Publication: November 2010.	NA	NA
NA	NA	NA	NA	NA	NA	NA	NA	NA	NA	NA	NA	NA	NA	NA	Ovid	Andersson N.			Proof of impact and pipeline planning: directions and challenges for social audit in the health sector.	NA	NA	NA	NA	NA	NA	NA	NA	NA	NA	NA	NA	NA	NA	NA	NA	NA	NA	NA	NA	NA	NA	NA	Embase	22376386	Andersson N.	Proof of impact and pipeline planning: directions and challenges for social audit in the health sector.	BMC health services research. 11 Suppl 2 (pp S16), 2011. Date of Publication: 2011.	NA	NA
NA	NA	NA	NA	NA	NA	NA	NA	NA	NA	NA	NA	NA	NA	NA	Ovid	Andersson Y. Hammarstrom M.-L. Lonnerdal B. Graverholt G. Falt H. Hernell O.			Formula feeding skews immune cell composition toward adaptive immunity compared to breastfeeding.	NA	NA	NA	NA	NA	NA	NA	NA	NA	NA	NA	NA	NA	NA	NA	NA	NA	NA	NA	NA	NA	NA	NA	Embase	2010365336	Andersson Y. Hammarstrom M.-L. Lonnerdal B. Graverholt G. Falt H. Hernell O.	Formula feeding skews immune cell composition toward adaptive immunity compared to breastfeeding.	Journal of Immunology. 183 (7) (pp 4322-4328), 2009. Date of Publication: 01 Oct 2009.	NA	NA
NA	NA	NA	NA	NA	NA	NA	NA	NA	NA	NA	NA	NA	NA	NA	ISRCTN	Andersson, Neil	NA	NA	A scaled up structural intervention program versus current national HIV prevention program	NA	NA	NA	NA	NA	NA	NA	NA	NA	NA	NA	NA	NA	NA	NA	NA	NA	NA	NA	NA	NA	NA	NA	NA	NA	NA	A scaled up structural intervention program versus current national HIV prevention program	NA	NA	NA
NA	NA	NA	NA	NA	NA	NA	NA	NA	NA	NA	NA	NA	NA	NA	ISRCTN	Andersson, Neil	NA	NA	Neonatal survival, cultural safety and traditional midwifery in indigenous communities of Guerrero State, Mexico	NA	NA	NA	NA	NA	NA	NA	NA	NA	NA	NA	NA	NA	NA	NA	NA	NA	NA	NA	NA	NA	NA	NA	NA	NA	NA	Neonatal survival, cultural safety and traditional midwifery in indigenous communities of Guerrero State, Mexico	NA	NA	NA
NA	Neil Andersson, Beverley Shea, Carol Amaratunga, Patricia McGuire, Georges Sioui	Rebuilding from Resilience: Research Framework for a Randomized Controlled Trial of Community-led Interventions to Prevent Domestic Violence in Aboriginal Communities	NA	NA	NA	NA	NA	NA	NA	NA	NA	NA	NA	NA	NCBI	Andersson, Neil; Shea, Beverley; Amaratunga, Carol; McGuire, Patricia; Sioui, Georges			Rebuilding from Resilience: Research Framework for a Randomized Controlled Trial of Community-led Interventions to Prevent Domestic Violence in Aboriginal Communities	NA	NA	NA	NA	NA	NA	NA	NA	NA	NA	NA	NA	NA	NA	NA	NA	NA	NA	NA	NA	Pimatisiwin. Author manuscript; available in PMC 2010 October 22.Published in final edited form as: Pimatisiwin. 2010 Fall; 8(2): 61???88.	PMC2962657	Andersson, Neil; Shea, Beverley; Amaratunga, Carol; McGuire, Patricia; Sioui, Georges	NA	NA	NA	NA	NA	NA	NA
NA	NA	NA	NA	NA	NA	NA	NA	NA	NA	NA	NA	NA	NA	NA	Ovid	Ando, M. a; Schemehorn, B. R. a; Eckert, G. J. b; Zero, D. T. a; Stookey, G. K. a			Influence of Enamel Thickness on Quantification of Mineral Loss in Enamel Using Laser-Induced Fluorescence.[Article]	NA	NA	NA	NA	NA	NA	NA	NA	NA	NA	NA	NA	NA	NA	NA	NA	NA	NA	NA	NA	NA	NA	NA	Journals@Ovid Full Text	00002860-200301000-00005.	Ando, M. a; Schemehorn, B. R. a; Eckert, G. J. b; Zero, D. T. a; Stookey, G. K. a	Influence of Enamel Thickness on Quantification of Mineral Loss in Enamel Using Laser-Induced Fluorescence.[Article]	Caries Research. 37(1):24-28, January/February 2003.	NA	Original Paper.
NA	NA	NA	NA	NA	NA	NA	NA	NA	NA	NA	NA	NA	NA	NA	Ovid	Andrassy, Joachim 1,5; Hoffmann, Verena S. 2; Rentsch, Markus 1; Stangl, Manfred 1; Habicht, Antje 3; Meiser, Bruno 3; Fischereder, Michael 4; Jauch, Karl-Walter 1; Guba, Markus 1			Is Cytomegalovirus Prophylaxis Dispensable in Patients Receiving an mTOR Inhibitor-Based Immunosuppression? A Systematic Review and Meta-Analysis.[Miscellaneous Article]	NA	NA	NA	NA	NA	NA	NA	NA	NA	NA	NA	NA	NA	NA	NA	NA	NA	NA	NA	NA	NA	NA	NA	Journals@Ovid Full Text	00007890-201212270-00006.	Andrassy, Joachim 1,5; Hoffmann, Verena S. 2; Rentsch, Markus 1; Stangl, Manfred 1; Habicht, Antje 3; Meiser, Bruno 3; Fischereder, Michael 4; Jauch, Karl-Walter 1; Guba, Markus 1	Is Cytomegalovirus Prophylaxis Dispensable in Patients Receiving an mTOR Inhibitor-Based Immunosuppression? A Systematic Review and Meta-Analysis.[Miscellaneous Article]	Transplantation. 94(12):1208-1217, December 27, 2012.	NA	Clinical and Translational Research.
NA	??ke Andr?”n-Sandberg	Clinical pancreatology I: Pancreatic medical history	NA	NA	NA	NA	NA	NA	NA	NA	NA	NA	NA	NA	NCBI	Andr?”n-Sandberg, ??ke			Clinical pancreatology I: Pancreatic medical history	NA	NA	NA	NA	NA	NA	NA	NA	NA	NA	NA	NA	NA	NA	NA	NA	NA	NA	NA	NA	N Am J Med Sci. 2010 November; 2(11): 502???509. doi:??10.4297/najms.2010.2502	PMC3338211	Andr?”n-Sandberg, ??ke	NA	NA	NA	NA	NA	NA	NA
NA	NA	NA	NA	NA	NA	NA	NA	NA	NA	NA	NA	NA	NA	NA	Ovid	Andreoni, K. A. a,*; Brayman, K. L. b; Guidinger, M. K. c; Sommers, C. M. d; Sung, R. S. c,e			Kidney and Pancreas Transplantation in the United States, 1996-2005.[Article]	NA	NA	NA	NA	NA	NA	NA	NA	NA	NA	NA	NA	NA	NA	NA	NA	NA	NA	NA	NA	NA	NA	NA	Journals@Ovid Full Text	00024798-200705020-00005.	Andreoni, K. A. a,*; Brayman, K. L. b; Guidinger, M. K. c; Sommers, C. M. d; Sung, R. S. c,e	Kidney and Pancreas Transplantation in the United States, 1996-2005.[Article]	American Journal of Transplantation. 7(5 Part 2):1359-1375, May 2007.	NA	Original Article.
NA	NA	NA	NA	NA	NA	NA	NA	NA	NA	NA	NA	NA	NA	NA	Ovid	Andres, A. 1; del Castillo, D. 2; Gainza, F. J. 3; Purroy, A. 4; Bustamante, J. 5; Rengel, M. 6; Pallardo, L. 7; Ortega, F. 8; Asensio, C. 9; Martins, L. 10; Tabernero, J. M. 11; Llorente, S. 12; Mota, A. 13			Comparison of a Secuential Therapy with Tacrolimus Versus a Standar Triple Therapy in Aged Kidney Transplantation with Aged Donors: Results of a Multicenter, Prospective and Randomized Trial (Estrella Study): Poster Board #-Session: P139-II: Abstract# 1152.[Abstract]	NA	NA	NA	NA	NA	NA	NA	NA	NA	NA	NA	NA	NA	NA	NA	NA	NA	NA	NA	NA	NA	NA	NA	Journals@Ovid Full Text	00024798-200705001-01152.	Andres, A. 1; del Castillo, D. 2; Gainza, F. J. 3; Purroy, A. 4; Bustamante, J. 5; Rengel, M. 6; Pallardo, L. 7; Ortega, F. 8; Asensio, C. 9; Martins, L. 10; Tabernero, J. M. 11; Llorente, S. 12; Mota, A. 13	Comparison of a Secuential Therapy with Tacrolimus Versus a Standar Triple Therapy in Aged Kidney Transplantation with Aged Donors: Results of a Multicenter, Prospective and Randomized Trial (Estrella Study): Poster Board #-Session: P139-II: Abstract# 1152.[Abstract]	American Journal of Transplantation. 7 (Supplement 2):443, May 2007.	NA	AMERICAN TRANSPLANT CONGRESS 2007 ABSTRACT: Kidney Immunosuppression: CNI Minimization-Avoidance Protocols.
NA	J. Matthew Andrews, James E. Ashfield, Michael Morse, Thomas F. Whelan	Five-year follow-up of active surveillance for prostate cancer: A Canadian community-based urological experience	NA	NA	NA	NA	NA	NA	NA	NA	NA	NA	NA	NA	NCBI	Andrews, J. Matthew; Ashfield, James E.; Morse, Michael; Whelan, Thomas F.			Five-year follow-up of active surveillance for prostate cancer: A Canadian community-based urological experience	NA	NA	NA	NA	NA	NA	NA	NA	NA	NA	NA	NA	NA	NA	NA	NA	NA	NA	NA	NA	Can Urol Assoc J. 2014 Nov-Dec; 8(11-12): E768???E774. Published online 2014 November 24. doi:??10.5489/cuaj.2186	PMC4250239	Andrews, J. Matthew; Ashfield, James E.; Morse, Michael; Whelan, Thomas F.	NA	NA	NA	NA	NA	NA	NA
NA	NA	NA	NA	NA	NA	NA	NA	NA	NA	NA	NA	NA	NA	NA	Ovid	Andrews, Jason R. 1,2; Lawn, Stephen D. 3,4; Dowdy, David W. 5,6; Walensky, Rochelle P. 1,2			Challenges in Evaluating the Cost-effectiveness of New Diagnostic Tests for HIV-Associated Tuberculosis.[Article]	NA	NA	NA	NA	NA	NA	NA	NA	NA	NA	NA	NA	NA	NA	NA	NA	NA	NA	NA	NA	NA	NA	NA	Journals@Ovid Full Text	01451458-201310010-00022.	Andrews, Jason R. 1,2; Lawn, Stephen D. 3,4; Dowdy, David W. 5,6; Walensky, Rochelle P. 1,2	Challenges in Evaluating the Cost-effectiveness of New Diagnostic Tests for HIV-Associated Tuberculosis.[Article]	Clinical Infectious Diseases. 57(7):1021-1026, October 1, 2013.	NA	INVITED ARTICLES.
NA	Peter JD Andrews, Alison Avenell, David W Noble, Marion K Campbell, Claire G Battison, Bernard L Croal, William G Simpson, John Norrie, Luke D Vale, Jonathon Cook, Robyn de Verteuil, Anne C Milne, The Trials Management Group	Randomised trial of glutamine and selenium supplemented parenteral nutrition for critically ill patients. Protocol Version 9, 19 February 2007 known as SIGNET (Scottish Intensive care Glutamine or seleNium Evaluative Trial)	NA	NA	NA	NA	NA	NA	NA	NA	NA	NA	NA	NA	NCBI	Andrews, Peter JD; Avenell, Alison; Noble, David W; Campbell, Marion K; Battison, Claire G; Croal, Bernard L; Simpson, William G; Norrie, John; Vale, Luke D; Cook, Jonathon; Verteuil, Robyn de; Milne, Anne C; Group, The Trials Management			Randomised trial of glutamine and selenium supplemented parenteral nutrition for critically ill patients. Protocol Version 9, 19 February 2007 known as SIGNET (Scottish Intensive care Glutamine or seleNium Evaluative Trial)	NA	NA	NA	NA	NA	NA	NA	NA	NA	NA	NA	NA	NA	NA	NA	NA	NA	NA	NA	NA	Trials. 2007; 8: 25. Published online 2007 September 20. doi:??10.1186/1745-6215-8-25	PMC2082027	Andrews, Peter JD; Avenell, Alison; Noble, David W; Campbell, Marion K; Battison, Claire G; Croal, Bernard L; Simpson, William G; Norrie, John; Vale, Luke D; Cook, Jonathon; Verteuil, Robyn de; Milne, Anne C; Group, The Trials Management	NA	NA	NA	NA	NA	NA	NA
NA	NA	NA	NA	NA	NA	NA	NA	NA	NA	NA	NA	NA	NA	NA	Ovid	Andrykowski, Michael A. 1,3; Redd, William H. 1; Hatfield, Alan K. 2			Development of Anticipatory Nausea: A Prospective Analysis.[Article]	NA	NA	NA	NA	NA	NA	NA	NA	NA	NA	NA	NA	NA	NA	NA	NA	NA	NA	NA	NA	NA	NA	NA	Journals@Ovid Full Text	00004730-198508000-00002.	Andrykowski, Michael A. 1,3; Redd, William H. 1; Hatfield, Alan K. 2	Development of Anticipatory Nausea: A Prospective Analysis.[Article]	Journal of Consulting & Clinical Psychology. 53(4):447-454, August 1985.	NA	Articles.
NA	NA	NA	NA	NA	NA	NA	NA	NA	NA	NA	NA	NA	NA	NA	Ovid	ANEMAN, A. 1; PARR, M. 1,2			Medical emergency teams: a role for expanding intensive care?.[Review]	NA	NA	NA	NA	NA	NA	NA	NA	NA	NA	NA	NA	NA	NA	NA	NA	NA	NA	NA	NA	NA	NA	NA	Journals@Ovid Full Text	00000013-200611000-00014.	ANEMAN, A. 1; PARR, M. 1,2	Medical emergency teams: a role for expanding intensive care?.[Review]	Acta Anaesthesiologica Scandinavica. 50(10):1255-1265, November 2006.	NA	EMERGENCY MEDICINE: Review Article.
NA	Fiorenzo Angehrn, Christoph Kuhn, Ortrud Sonnabend, Axel Voss	Extracorporeal shock waves as curative therapy for varicose veins?	NA	NA	NA	NA	NA	NA	NA	NA	NA	NA	NA	NA	NCBI	Angehrn, Fiorenzo; Kuhn, Christoph; Sonnabend, Ortrud; Voss, Axel			Extracorporeal shock waves as curative therapy for varicose veins?	NA	NA	NA	NA	NA	NA	NA	NA	NA	NA	NA	NA	NA	NA	NA	NA	NA	NA	NA	NA	Clin Interv Aging. 2008 March; 3(1): 175???182. Published online 2008 March.	PMC2544363	Angehrn, Fiorenzo; Kuhn, Christoph; Sonnabend, Ortrud; Voss, Axel	NA	NA	NA	NA	NA	NA	NA
NA	NA	NA	NA	NA	NA	NA	NA	NA	NA	NA	NA	NA	NA	NA	Ovid	Angeles R.N. Cuenter D. McCarthy L. Bauer M. Wolfson M. Chacon M. Bullock L.			Group interprofessional chronic pain management in the primary care setting: A pilot study of feasibility and effectiveness in a family health team in ontario.	NA	NA	NA	NA	NA	NA	NA	NA	NA	NA	NA	NA	NA	NA	NA	NA	NA	NA	NA	NA	NA	NA	NA	Embase	2013743180	Angeles R.N. Cuenter D. McCarthy L. Bauer M. Wolfson M. Chacon M. Bullock L.	Group interprofessional chronic pain management in the primary care setting: A pilot study of feasibility and effectiveness in a family health team in ontario.	Pain Research and Management. 18 (5) (pp 237-242), 2013. Date of Publication: September-October 2013.	NA	NA
NA	NA	NA	NA	NA	NA	NA	NA	NA	NA	NA	NA	NA	NA	NA	Ovid	Anglicheau, D. a,+,*; Loupy, A. a,+; Lefaucheur, C. b; Pessione, F. c; Letourneau, I. a; Cote, I. a; Gaha, K. a; Noel, L.-H. d; Patey, N. d; Droz, D. e; Martinez, F. a; Zuber, J. a; Glotz, D. b; Thervet, E. a; Legendre, C. a			A Simple Clinico-Histopathological Composite Scoring System Is Highly Predictive of Graft Outcomes in Marginal Donors.[Article]	NA	NA	NA	NA	NA	NA	NA	NA	NA	NA	NA	NA	NA	NA	NA	NA	NA	NA	NA	NA	NA	NA	NA	Journals@Ovid Full Text	00024798-200811000-00022.	Anglicheau, D. a,+,*; Loupy, A. a,+; Lefaucheur, C. b; Pessione, F. c; Letourneau, I. a; Cote, I. a; Gaha, K. a; Noel, L.-H. d; Patey, N. d; Droz, D. e; Martinez, F. a; Zuber, J. a; Glotz, D. b; Thervet, E. a; Legendre, C. a	A Simple Clinico-Histopathological Composite Scoring System Is Highly Predictive of Graft Outcomes in Marginal Donors.[Article]	American Journal of Transplantation. 8(11):2325-2334, November 2008.	NA	Original Article: Clinical Science.
NA	NA	NA	NA	NA	NA	NA	NA	NA	NA	NA	NA	NA	NA	NA	Ovid	Annis Emeott, Ann RN, MPH *; Markovitz, Amanda MPH *; Mason, Margaret H. MHSA +; Rajt, Lisa MSW +; Share, David A. MD, MPH +; Paustian, Michael PhD *; El Reda, Darline DrPH, MPH *			Four-Year Evolution of a Large, State-wide Patient-Centered Medical Home Designation Program in Michigan.[Article]	NA	NA	NA	NA	NA	NA	NA	NA	NA	NA	NA	NA	NA	NA	NA	NA	NA	NA	NA	NA	NA	NA	NA	Journals@Ovid Full Text	00005650-201309000-00014.	Annis Emeott, Ann RN, MPH *; Markovitz, Amanda MPH *; Mason, Margaret H. MHSA +; Rajt, Lisa MSW +; Share, David A. MD, MPH +; Paustian, Michael PhD *; El Reda, Darline DrPH, MPH *	Four-Year Evolution of a Large, State-wide Patient-Centered Medical Home Designation Program in Michigan.[Article]	Medical Care. 51(9):846-853, September 2013.	NA	Original Articles.
NA	NA	NA	NA	NA	NA	NA	NA	NA	NA	NA	NA	NA	NA	NA	Ovid	Anonymous			UK paediatric clinical research under threat.[Miscellaneous]	NA	NA	NA	NA	NA	NA	NA	NA	NA	NA	NA	NA	NA	NA	NA	NA	NA	NA	NA	NA	NA	NA	NA	Journals@Ovid Full Text	00000740-199701000-00001.	Anonymous	UK paediatric clinical research under threat.[Miscellaneous]	Archives of Disease in Childhood. 76(1):1-3, January 1997.	NA	Annotation.
NA	NA	NA	NA	NA	NA	NA	NA	NA	NA	NA	NA	NA	NA	NA	Ovid	Antolino G. Antonini G. Ferrari A. Verde G.L. Porrini R. Saltarelli F. Conte E. Veggia B. Naso V. Latino P. Arcese W. Montefusco E.			Successful autologous peripheral blood stem cell transplantation in 3 women with POEMS syndrome: A single centre experience.	NA	NA	NA	NA	NA	NA	NA	NA	NA	NA	NA	NA	NA	NA	NA	NA	NA	NA	NA	NA	NA	NA	NA	Embase	70773268	Antolino G. Antonini G. Ferrari A. Verde G.L. Porrini R. Saltarelli F. Conte E. Veggia B. Naso V. Latino P. Arcese W. Montefusco E.	Successful autologous peripheral blood stem cell transplantation in 3 women with POEMS syndrome: A single centre experience.	Blood. Conference: 53rd Annual Meeting of the American Society of Hematology, ASH 2011 San Diego, CA United States. Conference Start: 20111210 Conference End: 20111213. Conference Publication: (var.pagings). 118 (21) , 2011. Date of Publication: 18 Nov 2011.	NA	NA
NA	NA	NA	NA	NA	NA	NA	NA	NA	NA	NA	NA	NA	NA	NA	Ovid	Antonijevic D. Ilic D. Medic V. Dodic S. Obradovic-Djuricic K. Rakocevic Z.			Evaluation of conventional and digital radiography capacities for distinguishing dental materials on radiograms depending on the present radiopacifying agent.	NA	NA	NA	NA	NA	NA	NA	NA	NA	NA	NA	NA	NA	NA	NA	NA	NA	NA	NA	NA	NA	NA	NA	Embase	2014632662	Antonijevic D. Ilic D. Medic V. Dodic S. Obradovic-Djuricic K. Rakocevic Z.	Evaluation of conventional and digital radiography capacities for distinguishing dental materials on radiograms depending on the present radiopacifying agent.	Vojnosanitetski Pregled. 71 (11) (pp 1006-1012), 2014. Date of Publication: 2014.	NA	NA
NA	NA	NA	NA	NA	NA	NA	NA	NA	NA	NA	NA	NA	NA	NA	Ovid	Antonio-Gaddy, Mara San RN, MSN *; Richardson-Moore, April RN, MPH *; Burstein, Gale R MD, MPH, FAAP +; Newman, Daniel R MA +; Branson, Bernard M MD +; Birkhead, Guthrie S MD, MPH *			Rapid HIV Antibody Testing in the New York State Anonymous HIV Counseling and Testing Program: Experience From the Field.[Miscellaneous Article]	NA	NA	NA	NA	NA	NA	NA	NA	NA	NA	NA	NA	NA	NA	NA	NA	NA	NA	NA	NA	NA	NA	NA	Journals@Ovid Full Text	00126334-200612010-00011.	Antonio-Gaddy, Mara San RN, MSN *; Richardson-Moore, April RN, MPH *; Burstein, Gale R MD, MPH, FAAP +; Newman, Daniel R MA +; Branson, Bernard M MD +; Birkhead, Guthrie S MD, MPH *	Rapid HIV Antibody Testing in the New York State Anonymous HIV Counseling and Testing Program: Experience From the Field.[Miscellaneous Article]	JAIDS Journal of Acquired Immune Deficiency Syndromes. 43(4):446-450, December 1, 2006.	NA	Epidemiology and Social Science.
NA	NA	NA	NA	NA	NA	NA	NA	NA	NA	NA	NA	NA	NA	NA	Ovid	Aoki, Akiko 1; Kojima, Fumiko 1; Uchida, Keiko 1; Tanaka, Yoshiko 2; Nitta, Kosaku 1			Associations between vascular calcification, arterial stiffness and bone mineral density in chronic hemodialysis patients.[Article]	NA	NA	NA	NA	NA	NA	NA	NA	NA	NA	NA	NA	NA	NA	NA	NA	NA	NA	NA	NA	NA	NA	NA	Journals@Ovid Full Text	00134452-200909000-00005.	Aoki, Akiko 1; Kojima, Fumiko 1; Uchida, Keiko 1; Tanaka, Yoshiko 2; Nitta, Kosaku 1	Associations between vascular calcification, arterial stiffness and bone mineral density in chronic hemodialysis patients.[Article]	Geriatrics & Gerontology International. 9(3):246-252, September 2009.	NA	ORIGINAL ARTICLES: EPIDEMIOLOGY, CLINICAL PRACTICE AND HEALTH.
NA	NA	NA	NA	NA	NA	NA	NA	NA	NA	NA	NA	NA	NA	NA	Ovid	Aoun S. Toye C. Grande G. Ewing G. Stajduhar K.			Implementing and evaluating the impact of the carer support needs assessment tool (CSNAT) in community palliative care in Australia.	NA	NA	NA	NA	NA	NA	NA	NA	NA	NA	NA	NA	NA	NA	NA	NA	NA	NA	NA	NA	NA	NA	NA	Embase	71484318	Aoun S. Toye C. Grande G. Ewing G. Stajduhar K.	Implementing and evaluating the impact of the carer support needs assessment tool (CSNAT) in community palliative care in Australia.	Palliative Medicine. Conference: 8th World Research Congress of the European Association for Palliative Care, EAPC 2014 Lleida Spain. Conference Start: 20140605 Conference End: 20140607. Conference Publication: (var.pagings). 28 (6) (pp 606), 2014. Date of Publication: June 2014.	NA	NA
NA	NA	NA	NA	NA	NA	NA	NA	NA	NA	NA	NA	NA	NA	NA	Ovid	Aoyagi Y. Takahashi H. Iwasaki N. Honda E.-I. Kurabayashi T.			Radiopacity of experimental composite resins containing radiopaque materials.	NA	NA	NA	NA	NA	NA	NA	NA	NA	NA	NA	NA	NA	NA	NA	NA	NA	NA	NA	NA	NA	NA	NA	Embase	16279720	Aoyagi Y. Takahashi H. Iwasaki N. Honda E.-I. Kurabayashi T.	Radiopacity of experimental composite resins containing radiopaque materials.	Dental Materials Journal. 24 (3) (pp 315-320), 2005. Date of Publication: September 2005.	NA	NA
NA	NA	NA	NA	NA	NA	NA	NA	NA	NA	NA	NA	NA	NA	NA	Ovid	Aragona, Francesco; Pepe, Pietro 1; Patane, Domenico 1; Malfa, Pierantonio 1; D'Arrigo, Letterio 1; Pennisi, Michele 1			Management of severe blunt renal trauma in adult patients: a 10-year retrospective review from an emergency hospital.[Miscellaneous Article]	NA	NA	NA	NA	NA	NA	NA	NA	NA	NA	NA	NA	NA	NA	NA	NA	NA	NA	NA	NA	NA	NA	NA	Journals@Ovid Full Text	00125504-201209000-00020.	Aragona, Francesco; Pepe, Pietro 1; Patane, Domenico 1; Malfa, Pierantonio 1; D'Arrigo, Letterio 1; Pennisi, Michele 1	Management of severe blunt renal trauma in adult patients: a 10-year retrospective review from an emergency hospital.[Miscellaneous Article]	BJU International. 110(5):744-748, September 2012.	NA	Upper Urinary Tract.
NA	NA	NA	NA	NA	NA	NA	NA	NA	NA	NA	NA	NA	NA	NA	Ovid	Araneo B.A. Yowell R.L. Sercarz E.E.			Ir gene defects may reflect a regulatory imbalance. I. Helper T cell activity revealed in a strain whose lack of response is controlled by suppression.	NA	NA	NA	NA	NA	NA	NA	NA	NA	NA	NA	NA	NA	NA	NA	NA	NA	NA	NA	NA	NA	NA	NA	Embase	979230914	Araneo B.A. Yowell R.L. Sercarz E.E.	Ir gene defects may reflect a regulatory imbalance. I. Helper T cell activity revealed in a strain whose lack of response is controlled by suppression.	Journal of Immunology. 123 (3) (pp 961-967), 1979. Date of Publication: 1979.	NA	NA
NA	NA	NA	NA	NA	NA	NA	NA	NA	NA	NA	NA	NA	NA	NA	Ovid	Arar, Nedal H PhD; Noel, Polly H PhD; Leykum, Luci MD; Zeber, John E PhD; Romero, Raquel MD; Parchman, Michael L MD			Implementing quality improvement in small, autonomous primary care practices: implications for the patient-centred medical home.[Article]	NA	NA	NA	NA	NA	NA	NA	NA	NA	NA	NA	NA	NA	NA	NA	NA	NA	NA	NA	NA	NA	NA	NA	Journals@Ovid Full Text	00149625-201119050-00003.	Arar, Nedal H PhD; Noel, Polly H PhD; Leykum, Luci MD; Zeber, John E PhD; Romero, Raquel MD; Parchman, Michael L MD	Implementing quality improvement in small, autonomous primary care practices: implications for the patient-centred medical home.[Article]	Quality in Primary Care. 19(5):289-300, 2011.	NA	Research papers.
NA	NA	NA	NA	NA	NA	NA	NA	NA	NA	NA	NA	NA	NA	NA	Ovid	Araya, Tekebash 1; Reniers, Georges 2; Schaap, Ab 3; Kebede, Derege 1; Kumie, Abera 1; Nagelkerke, Nico 4; Coutinho, Roel 3,5; Sanders, Eduard 3			Lay diagnosis of causes of death for monitoring AIDS mortality in Addis Ababa, Ethiopia.[Article]	NA	NA	NA	NA	NA	NA	NA	NA	NA	NA	NA	NA	NA	NA	NA	NA	NA	NA	NA	NA	NA	NA	NA	Journals@Ovid Full Text	00060771-200401000-00023.	Araya, Tekebash 1; Reniers, Georges 2; Schaap, Ab 3; Kebede, Derege 1; Kumie, Abera 1; Nagelkerke, Nico 4; Coutinho, Roel 3,5; Sanders, Eduard 3	Lay diagnosis of causes of death for monitoring AIDS mortality in Addis Ababa, Ethiopia.[Article]	Tropical Medicine & International Health. 9(1):178-186, January 2004.	NA	Original articles.
NA	NA	NA	NA	NA	NA	NA	NA	NA	NA	NA	NA	NA	NA	NA	Ovid	Ard, J; Rosati, R; Oddone, E Z			ASSESSMENT OF A CULTURALLY SENSITIVE WEIGHT LOSS PROGRAM IN AFRICAN AMERICANS.[Report]	NA	NA	NA	NA	NA	NA	NA	NA	NA	NA	NA	NA	NA	NA	NA	NA	NA	NA	NA	NA	NA	NA	NA	Journals@Ovid Full Text	00005125-199704001-00400.	Ard, J; Rosati, R; Oddone, E Z	ASSESSMENT OF A CULTURALLY SENSITIVE WEIGHT LOSS PROGRAM IN AFRICAN AMERICANS.[Report]	Journal of General Internal Medicine. 12 (Supplement 1):116, April 1997.	NA	Society of General Internal Medicine; 20th Annual Meeting; Washington, DC; May 1-3, 1997.
NA	Juan A. Ardura, Bin Wang, Simon C. Watkins, Jean-Pierre Vilardaga, Peter A. Friedman	Dynamic Na+-H+ Exchanger Regulatory Factor-1 Association and Dissociation Regulate Parathyroid Hormone Receptor Trafficking at Membrane Microdomains	NA	NA	NA	NA	NA	NA	NA	NA	NA	NA	NA	NA	NCBI	Ardura, Juan A.; Wang, Bin; Watkins, Simon C.; Vilardaga, Jean-Pierre; Friedman, Peter A.			Dynamic Na+-H+ Exchanger Regulatory Factor-1 Association and Dissociation Regulate Parathyroid Hormone Receptor Trafficking at Membrane Microdomains	NA	NA	NA	NA	NA	NA	NA	NA	NA	NA	NA	NA	NA	NA	NA	NA	NA	NA	NA	NA	J Biol Chem. 2011 October 7; 286(40): 35020???35029. Published online 2011 August 8. doi:??10.1074/jbc.M111.264978	PMC3186428	Ardura, Juan A.; Wang, Bin; Watkins, Simon C.; Vilardaga, Jean-Pierre; Friedman, Peter A.	NA	NA	NA	NA	NA	NA	NA
NA	NA	NA	NA	NA	NA	NA	NA	NA	NA	NA	NA	NA	NA	NA	Ovid	Arendt M.D. Schwenter J.A. Witherington B.E. Meylan A.B. Saba V.S.			Historical versus contemporary climate forcing on the annual nesting variability of loggerhead sea turtles in the Northwest Atlantic Ocean.	NA	NA	NA	NA	NA	NA	NA	NA	NA	NA	NA	NA	NA	NA	NA	NA	NA	NA	NA	NA	NA	NA	NA	Embase	2014027996	Arendt M.D. Schwenter J.A. Witherington B.E. Meylan A.B. Saba V.S.	Historical versus contemporary climate forcing on the annual nesting variability of loggerhead sea turtles in the Northwest Atlantic Ocean.	PLoS ONE. 8 (12) , 2013. Article Number: e81097. Date of Publication: 05 Dec 2013.	NA	NA
NA	L Arevshatian, CJ Clements, SK Lwanga, AO Misore, P Ndumbe, JF Seward, P Taylor	An evaluation of infant immunization in Africa: is a transformation in progress?	NA	NA	NA	NA	NA	NA	NA	NA	NA	NA	NA	NA	NCBI	Arevshatian, L; Clements, CJ; Lwanga, SK; Misore, AO; Ndumbe, P; Seward, JF; Taylor, P			An evaluation of infant immunization in Africa: is a transformation in progress?	NA	NA	NA	NA	NA	NA	NA	NA	NA	NA	NA	NA	NA	NA	NA	NA	NA	NA	NA	NA	Bull World Health Organ. 2007 June; 85(6): 449???457. doi:??10.2471/BLT.06.031526	PMC2636339	Arevshatian, L; Clements, CJ; Lwanga, SK; Misore, AO; Ndumbe, P; Seward, JF; Taylor, P	NA	NA	NA	NA	NA	NA	NA
NA	NA	NA	NA	NA	NA	NA	NA	NA	NA	NA	NA	NA	NA	NA	Ovid	Arikan, Soykan MD; Kocakusak, Ahmet MD; Yucel, Ahmet F. MD; Adas, Gokhan MD			A Prospective Comparison of the Selective Observation and Routine Exploration Methods for Penetrating Abdominal Stab Wounds With Organ or Omentum Evisceration.[Article]	NA	NA	NA	NA	NA	NA	NA	NA	NA	NA	NA	NA	NA	NA	NA	NA	NA	NA	NA	NA	NA	NA	NA	Journals@Ovid Full Text	00005373-200503000-00015.	Arikan, Soykan MD; Kocakusak, Ahmet MD; Yucel, Ahmet F. MD; Adas, Gokhan MD	A Prospective Comparison of the Selective Observation and Routine Exploration Methods for Penetrating Abdominal Stab Wounds With Organ or Omentum Evisceration.[Article]	Journal of Trauma-Injury Infection & Critical Care. 58(3):526-532, March 2005.	NA	Original Articles.
NA	Armstrong, Julie; Abraham, Elizheeba Christie; Squair, Mhairi; Brogan, Yvonne; Merewood, Anne	Exclusive Breastfeeding, Complementary Feeding, and Food Choices in UK Infants	JOURNAL OF HUMAN LACTATION	NA	NA	NA	NA	NA	NA	NA	30	NA	24362005	NA	WebOfKnowledge	Armstrong, Julie; Abraham, Elizheeba Christie; Squair, Mhairi; Brogan, Yvonne; Merewood, Anne			Exclusive Breastfeeding, Complementary Feeding, and Food Choices in UK Infants	NA	NA	NA	NA	NA	2		279	NA		NA	0890-3344	NA	NA	NA	NA	NA	NA	NA	NA	NA	NA	NA	NA	NA	NA	NA	NA	NA	NA
NA	Arnas, Per Olof; Holmstrom, Jan; Kalantari, Joakim	In-transit services and hybrid shipment control: The use of smart goods in transportation networks	TRANSPORTATION RESEARCH PART C-EMERGING TECHNOLOGIES	NA	NA	NA	NA	NA	NA	NA	36	NA	NA	NA	WebOfKnowledge	Arnas, Per Olof; Holmstrom, Jan; Kalantari, Joakim			In-transit services and hybrid shipment control: The use of smart goods in transportation networks	NA	NA	NA	NA	NA			327	NA		NA	0968-090X	NA	NA	NA	NA	NA	NA	NA	NA	NA	NA	NA	NA	NA	NA	NA	NA	NA	NA
NA	NA	NA	NA	NA	NA	NA	NA	NA	NA	NA	NA	NA	NA	NA	Ovid	Arndt, V. 1,*; Kaatsch, P. 2; Steliarova-Foucher, E. 3; Peris-Bonet, R. 4; Brenner, H. 1			Up-to-date monitoring of childhood cancer long-term survival in Europe: central nervous system tumours.[Article]	NA	NA	NA	NA	NA	NA	NA	NA	NA	NA	NA	NA	NA	NA	NA	NA	NA	NA	NA	NA	NA	NA	NA	Journals@Ovid Full Text	00002352-200710000-00022.	Arndt, V. 1,*; Kaatsch, P. 2; Steliarova-Foucher, E. 3; Peris-Bonet, R. 4; Brenner, H. 1	Up-to-date monitoring of childhood cancer long-term survival in Europe: central nervous system tumours.[Article]	Annals of Oncology. 18(10):1734-1742, October 2007.	NA	original article: pediatric malignancies.
NA	NA	NA	NA	NA	NA	NA	NA	NA	NA	NA	NA	NA	NA	NA	Ovid	Arnfield, Mark R. a); Otto, Karl; Aroumougame, Vijayan R.; Alkins, Ryan D.			The use of film dosimetry of the penumbra region to improve the accuracy of intensity modulated radiotherapy.[Miscellaneous Article]	NA	NA	NA	NA	NA	NA	NA	NA	NA	NA	NA	NA	NA	NA	NA	NA	NA	NA	NA	NA	NA	NA	NA	Journals@Ovid Full Text	00005706-200501000-00003.	Arnfield, Mark R. a); Otto, Karl; Aroumougame, Vijayan R.; Alkins, Ryan D.	The use of film dosimetry of the penumbra region to improve the accuracy of intensity modulated radiotherapy.[Miscellaneous Article]	Medical Physics. 32(1):12-18, January 2005.	NA	RADIATION THERAPY PHYSICS.
NA	NA	NA	NA	NA	NA	NA	NA	NA	NA	NA	NA	NA	NA	NA	Ovid	Arnold-Kunz G. Ruiz J.			Preventing coronaropathy in type 2 diabetes. From evidence based medicine to patient based reality.	NA	NA	NA	NA	NA	NA	NA	NA	NA	NA	NA	NA	NA	NA	NA	NA	NA	NA	NA	NA	NA	NA	NA	Embase	2007308205	Arnold-Kunz G. Ruiz J.	Preventing coronaropathy in type 2 diabetes. From evidence based medicine to patient based reality.	Revue Medicale Suisse. 3 (114) (pp 1456-1462), 2007. Date of Publication: 06 Jun 2007.	NA	NA
NA	Ludovic Arnold, Adeline Henry, Fran??oise Poron, Yasmine Baba-Amer, Nico van Rooijen, Anne Plonquet, Romain K. Gherardi, B?”n?”dicte Chazaud	Inflammatory monocytes recruited after skeletal muscle injury switch into antiinflammatory macrophages to support myogenesis	NA	NA	NA	NA	NA	NA	NA	NA	NA	NA	NA	NA	NCBI	Arnold, Ludovic; Henry, Adeline; Poron, Fran??oise; Baba-Amer, Yasmine; Rooijen, Nico van; Plonquet, Anne; Gherardi, Romain K.; Chazaud, B?”n?”dicte			Inflammatory monocytes recruited after skeletal muscle injury switch into antiinflammatory macrophages to support myogenesis	NA	NA	NA	NA	NA	NA	NA	NA	NA	NA	NA	NA	NA	NA	NA	NA	NA	NA	NA	NA	J Exp Med. 2007 May 14; 204(5): 1057???1069. doi:??10.1084/jem.20070075	PMC2118577	Arnold, Ludovic; Henry, Adeline; Poron, Fran??oise; Baba-Amer, Yasmine; Rooijen, Nico van; Plonquet, Anne; Gherardi, Romain K.; Chazaud, B?”n?”dicte	NA	NA	NA	NA	NA	NA	NA
NA	Sarah J Arnup, Andrew B Forbes, Brennan C Kahan, Katy E Morgan, Steve McDonald, Joanne E McKenzie	The use of the cluster randomized crossover design in clinical trials: protocol for a systematic review	NA	NA	NA	NA	NA	NA	NA	NA	NA	NA	NA	NA	NCBI	Arnup, Sarah J; Forbes, Andrew B; Kahan, Brennan C; Morgan, Katy E; McDonald, Steve; McKenzie, Joanne E			The use of the cluster randomized crossover design in clinical trials: protocol for a systematic review	NA	NA	NA	NA	NA	NA	NA	NA	NA	NA	NA	NA	NA	NA	NA	NA	NA	NA	NA	NA	Syst Rev. 2014; 3: 86. Published online 2014 August 12. doi:??10.1186/2046-4053-3-86	PMC4138528	Arnup, Sarah J; Forbes, Andrew B; Kahan, Brennan C; Morgan, Katy E; McDonald, Steve; McKenzie, Joanne E	NA	NA	NA	NA	NA	NA	NA
NA	NA	NA	NA	NA	NA	NA	NA	NA	NA	NA	NA	NA	NA	NA	Ovid	Aron, Monish a; Gill, Inderbir S. a; Boorjian, Stephen A. b; Uzzo, Robert G. b			Treatment of the 2 to 3 cm Renal Mass.[Editorial]	NA	NA	NA	NA	NA	NA	NA	NA	NA	NA	NA	NA	NA	NA	NA	NA	NA	NA	NA	NA	NA	NA	NA	Journals@Ovid Full Text	00076734-201008000-00007.	Aron, Monish a; Gill, Inderbir S. a; Boorjian, Stephen A. b; Uzzo, Robert G. b	Treatment of the 2 to 3 cm Renal Mass.[Editorial]	Journal of Urology. 184(2):419-422, August 2010.	NA	Opposing Views.
NA	Vineet M. Arora, McKenna C. Eastment, Emily D. Bethea, Jeanne M. Farnan, Erica S. Friedman	Participation and Experience of Third-Year Medical Students in Handoffs: Time to Sign Out?	NA	NA	NA	NA	NA	NA	NA	NA	NA	NA	NA	NA	NCBI	Arora, Vineet M.; Eastment, McKenna C.; Bethea, Emily D.; Farnan, Jeanne M.; Friedman, Erica S.			Participation and Experience of Third-Year Medical Students in Handoffs: Time to Sign Out?	NA	NA	NA	NA	NA	NA	NA	NA	NA	NA	NA	NA	NA	NA	NA	NA	NA	NA	NA	NA	J Gen Intern Med. 2013 August; 28(8): 994???998. Published online 2013 April 18. doi:??10.1007/s11606-012-2297-9	PMC3710385	Arora, Vineet M.; Eastment, McKenna C.; Bethea, Emily D.; Farnan, Jeanne M.; Friedman, Erica S.	NA	NA	NA	NA	NA	NA	NA
NA	G?”raldine Arrode, Claire Boccaccio, Jean-Pierre Abastado, Christian Davrinche	Cross-Presentation of Human Cytomegalovirus pp65 (UL83) to CD8+ T Cells Is Regulated by Virus-Induced, Soluble-Mediator-Dependent Maturation of Dendritic Cells	NA	NA	NA	NA	NA	NA	NA	NA	NA	NA	NA	NA	NCBI	Arrode, G?”raldine; Boccaccio, Claire; Abastado, Jean-Pierre; Davrinche, Christian			Cross-Presentation of Human Cytomegalovirus pp65 (UL83) to CD8+ T Cells Is Regulated by Virus-Induced, Soluble-Mediator-Dependent Maturation of Dendritic Cells	NA	NA	NA	NA	NA	NA	NA	NA	NA	NA	NA	NA	NA	NA	NA	NA	NA	NA	NA	NA	J Virol. 2002 January; 76(1): 142???150. doi:??10.1128/JVI.76.1.142-150.2002	PMC135703	Arrode, G?”raldine; Boccaccio, Claire; Abastado, Jean-Pierre; Davrinche, Christian	NA	NA	NA	NA	NA	NA	NA
NA	NA	NA	NA	NA	NA	NA	NA	NA	NA	NA	NA	NA	NA	NA	Ovid	Arshad S.H.			Allergen avoidance and prevention of atopy.	NA	NA	NA	NA	NA	NA	NA	NA	NA	NA	NA	NA	NA	NA	NA	NA	NA	NA	NA	NA	NA	NA	NA	Embase	2004198481	Arshad S.H.	Allergen avoidance and prevention of atopy.	Current Opinion in Allergy and Clinical Immunology. 4 (2) (pp 119-123), 2004. Date of Publication: April 2004.	NA	NA
NA	NA	NA	NA	NA	NA	NA	NA	NA	NA	NA	NA	NA	NA	NA	Ovid	Arshad, S. Hasan			Food allergen avoidance in primary prevention of food allergy.[Report]	NA	NA	NA	NA	NA	NA	NA	NA	NA	NA	NA	NA	NA	NA	NA	NA	NA	NA	NA	NA	NA	NA	NA	Journals@Ovid Full Text	00019078-200100003-00029.	Arshad, S. Hasan	Food allergen avoidance in primary prevention of food allergy.[Report]	Allergy, Supplement. 56 (Supplement 67):113-116, 2001.	NA	Symposium on Immunological, Chemical and Clinical Problems of Food Allergy, 11-13 March 2001, Venice.
NA	NA	NA	NA	NA	NA	NA	NA	NA	NA	NA	NA	NA	NA	NA	Ovid	Arshad, Syed Hasan DM, FRCP			Primary prevention of asthma and allergy.[Article]	NA	NA	NA	NA	NA	NA	NA	NA	NA	NA	NA	NA	NA	NA	NA	NA	NA	NA	NA	NA	NA	NA	NA	Journals@Ovid Full Text	00004483-200507000-00002.	Arshad, Syed Hasan DM, FRCP	Primary prevention of asthma and allergy.[Article]	Journal of Allergy & Clinical Immunology. 116(1):3-14, July 2005.	NA	Review and feature article: Current reviews of allergy and clinical immunology.
NA	NA	NA	NA	NA	NA	NA	NA	NA	NA	NA	NA	NA	NA	NA	Ovid	Arthur, R. A. a,c; Waeiss, R. A. a; Hara, A. T. a; Lippert, F. a; Eckert, G. J. b; Zero, D. T. a			A Defined-Multispecies Microbial Model for Studying Enamel Caries Development.[Article]	NA	NA	NA	NA	NA	NA	NA	NA	NA	NA	NA	NA	NA	NA	NA	NA	NA	NA	NA	NA	NA	NA	NA	Journals@Ovid Full Text	00002860-201308000-00007.	Arthur, R. A. a,c; Waeiss, R. A. a; Hara, A. T. a; Lippert, F. a; Eckert, G. J. b; Zero, D. T. a	A Defined-Multispecies Microbial Model for Studying Enamel Caries Development.[Article]	Caries Research. 47(4):318-324, August 2013.	NA	Original Paper.
NA	Artis, D; Humphreys, NE; Potten, CS; Wagner, N; Muller, W; McDermott, JR; Grencis, RK; Else, KJ	beta 7 integrin-deficient mice: delayed leukocyte recruitment and attenuated protective immunity in the small intestine during enteric helminth infection	EUROPEAN JOURNAL OF IMMUNOLOGY	NA	NA	NA	NA	NA	NA	NA	30	NA	10898502	NA	WebOfKnowledge	Artis, D; Humphreys, NE; Potten, CS; Wagner, N; Muller, W; McDermott, JR; Grencis, RK; Else, KJ			beta 7 integrin-deficient mice: delayed leukocyte recruitment and attenuated protective immunity in the small intestine during enteric helminth infection	NA	NA	NA	NA	NA	6		202	NA		NA	0014-2980	NA	NA	NA	NA	NA	NA	NA	NA	NA	NA	NA	NA	NA	NA	NA	NA	NA	NA
NA	Debby Arts-Rodas, Diane Benoit	Feeding problems in infancy and early childhood: Identification and management	NA	NA	NA	NA	NA	NA	NA	NA	NA	NA	NA	NA	NCBI	Arts-Rodas, Debby; Benoit, Diane			Feeding problems in infancy and early childhood: Identification and management	NA	NA	NA	NA	NA	NA	NA	NA	NA	NA	NA	NA	NA	NA	NA	NA	NA	NA	NA	NA	Paediatr Child Health. 1998 Jan-Feb; 3(1): 21???27.	PMC2851259	Arts-Rodas, Debby; Benoit, Diane	NA	NA	NA	NA	NA	NA	NA
NA	NA	NA	NA	NA	NA	NA	NA	NA	NA	NA	NA	NA	NA	NA	Ovid	Arun V. Patnaik P. Pal S. Dash N.R. Garg P. Madhusudhan K.S. Sahni P.			Delayed necrosectomy in severe acute necrotizing pancreatitis: Experience from a tertiary care centre.	NA	NA	NA	NA	NA	NA	NA	NA	NA	NA	NA	NA	NA	NA	NA	NA	NA	NA	NA	NA	NA	NA	NA	Embase	71463688	Arun V. Patnaik P. Pal S. Dash N.R. Garg P. Madhusudhan K.S. Sahni P.	Delayed necrosectomy in severe acute necrotizing pancreatitis: Experience from a tertiary care centre.	Pancreatology. Conference: 5th International Conference of Asian Oceanic Pancreas Association, AOPA 2014 New Delhi India. Conference Start: 20140418 Conference End: 20140420. Conference Publication: (var.pagings). 14 (2 SUPPL. 1) (pp S7), 2014. Date of Publication: March-April 2014.	NA	NA
NA	NA	NA	NA	NA	NA	NA	NA	NA	NA	NA	NA	NA	NA	NA	Ovid	Asamura, H.			Multipoint Oncology Teleconference, Japan.[Miscellaneous]	NA	NA	NA	NA	NA	NA	NA	NA	NA	NA	NA	NA	NA	NA	NA	NA	NA	NA	NA	NA	NA	NA	NA	Journals@Ovid Full Text	00005422-200505000-00012.	Asamura, H.	Multipoint Oncology Teleconference, Japan.[Miscellaneous]	Japanese Journal of Clinical Oncology. 35(5):287-288, May 2005.	NA	Multipoint Oncology Teleconference, Japan.
NA	NA	NA	NA	NA	NA	NA	NA	NA	NA	NA	NA	NA	NA	NA	Ovid	Asano, Nobuhisa 1 2; Kobayashi, Yasuki 1; Kano, Katsumi 2			Issues of intervention aimed at preventing prospective surplus of physicians in Japan.[Miscellaneous]	NA	NA	NA	NA	NA	NA	NA	NA	NA	NA	NA	NA	NA	NA	NA	NA	NA	NA	NA	NA	NA	NA	NA	Journals@Ovid Full Text	00005855-200105000-00013.	Asano, Nobuhisa 1 2; Kobayashi, Yasuki 1; Kano, Katsumi 2	Issues of intervention aimed at preventing prospective surplus of physicians in Japan.[Miscellaneous]	Medical Education. 35(5):488-494, May 2001.	NA	Careers.
NA	Asberg, Anders; Midtvedt, Karsten; van Guilder, Mike; Storset, Elisabet; Bremer, Sara; Bergan, Stein; Jelliffe, Roger; Hartmann, Anders; Neely, Michael N.	Inclusion of CYP3A5 genotyping in a nonparametric population model improves dosing of tacrolimus early after transplantation	TRANSPLANT INTERNATIONAL	NA	NA	NA	NA	NA	NA	NA	26	NA	24118301	NA	WebOfKnowledge	Asberg, Anders; Midtvedt, Karsten; van Guilder, Mike; Storset, Elisabet; Bremer, Sara; Bergan, Stein; Jelliffe, Roger; Hartmann, Anders; Neely, Michael N.			Inclusion of CYP3A5 genotyping in a nonparametric population model improves dosing of tacrolimus early after transplantation	NA	NA	NA	NA	NA	12		84	NA		NA	0934-0874	NA	NA	NA	NA	NA	NA	NA	NA	NA	NA	NA	NA	NA	NA	NA	NA	NA	NA
NA	NA	NA	NA	NA	NA	NA	NA	NA	NA	NA	NA	NA	NA	NA	Ovid	Ascher, H.; Hallberg, L.; Hulthen, L; Kilander, A.; Lundberg, P-A; Nilsson, L-A; Ahren, C; Lindstedt, G.			PREVALENCE OF UNDIAGNOSED COELIAC DISEASE IN SWEDISH ADOLESCENTS IN BIRTH COHORTS WITH A LOW PREVALENCE OF DIAGNOSED COELIAC DISEASE.[Report]	NA	NA	NA	NA	NA	NA	NA	NA	NA	NA	NA	NA	NA	NA	NA	NA	NA	NA	NA	NA	NA	NA	NA	Journals@Ovid Full Text	00005176-199704000-00062.	Ascher, H.; Hallberg, L.; Hulthen, L; Kilander, A.; Lundberg, P-A; Nilsson, L-A; Ahren, C; Lindstedt, G.	PREVALENCE OF UNDIAGNOSED COELIAC DISEASE IN SWEDISH ADOLESCENTS IN BIRTH COHORTS WITH A LOW PREVALENCE OF DIAGNOSED COELIAC DISEASE.[Report]	Journal of Pediatric Gastroenterology & Nutrition. 24(4):462, April 1997.	NA	Annual Meeting Of The European Society Of Pediatric Gastroenterology And Nutrition Thessaloniki, May 21-24, 1997.
NA	NA	NA	NA	NA	NA	NA	NA	NA	NA	NA	NA	NA	NA	NA	Ovid	Ascierto, Paolo A. *; Caraco, Corrado; Ionna, Franco; Pezzullo, Luciano; Palmieri, Giuseppe; Melucci, Maria Teresa; Canzanella, Sergio; for the Melanoma Cooperative Group			Mobile hospital rooms to fight melanoma.[Letter]	NA	NA	NA	NA	NA	NA	NA	NA	NA	NA	NA	NA	NA	NA	NA	NA	NA	NA	NA	NA	NA	NA	NA	Journals@Ovid Full Text	00008390-200102000-00010.	Ascierto, Paolo A. *; Caraco, Corrado; Ionna, Franco; Pezzullo, Luciano; Palmieri, Giuseppe; Melucci, Maria Teresa; Canzanella, Sergio; for the Melanoma Cooperative Group	Mobile hospital rooms to fight melanoma.[Letter]	Melanoma Research. 11(1):83-84, February 2001.	NA	Letters To The Editors.
NA	NA	NA	NA	NA	NA	NA	NA	NA	NA	NA	NA	NA	NA	NA	Ovid	Ashabani, Abdelhakim *+; Errabtea, Haneva +; Shapan, Abdellatif +; Tuckova, Ludmila *; Tlaskalova-Hogenova, Helena *			Serologic Markers of Untreated Celiac Disease in Libyan Children: Antigliadin, Antitransglutaminase, Antiendomysial, and Anticalreticulin Antibodies.[Article]	NA	NA	NA	NA	NA	NA	NA	NA	NA	NA	NA	NA	NA	NA	NA	NA	NA	NA	NA	NA	NA	NA	NA	Journals@Ovid Full Text	00005176-200109000-00009.	Ashabani, Abdelhakim *+; Errabtea, Haneva +; Shapan, Abdellatif +; Tuckova, Ludmila *; Tlaskalova-Hogenova, Helena *	Serologic Markers of Untreated Celiac Disease in Libyan Children: Antigliadin, Antitransglutaminase, Antiendomysial, and Anticalreticulin Antibodies.[Article]	Journal of Pediatric Gastroenterology & Nutrition. 33(3):276-282, September 2001.	NA	Original Articles.
NA	NA	NA	NA	NA	NA	NA	NA	NA	NA	NA	NA	NA	NA	NA	Ovid	Asher J. Vasdev N. Wyrley-Birch H. Wilson C. Soomro N. Rix D. Jaques B. Manas D. Torpey N. Talbot D.			A prospective randomised paired trial of sirolimus versus tacrolimus as primary immunosuppression following non-heart beating donor kidney transplantation.	NA	NA	NA	NA	NA	NA	NA	NA	NA	NA	NA	NA	NA	NA	NA	NA	NA	NA	NA	NA	NA	NA	NA	Embase	2014910964	Asher J. Vasdev N. Wyrley-Birch H. Wilson C. Soomro N. Rix D. Jaques B. Manas D. Torpey N. Talbot D.	A prospective randomised paired trial of sirolimus versus tacrolimus as primary immunosuppression following non-heart beating donor kidney transplantation.	Current Urology. 7 (4) (pp 174-180), 2013. Date of Publication: 19 Nov 2014.	NA	NA
NA	NA	NA	NA	NA	NA	NA	NA	NA	NA	NA	NA	NA	NA	NA	Ovid	Asher J.F. Wilson C.H. Gupta A. Gok M.A. Talbot D.			Use of daclizumab in preventing delayed graft function in non-heart beating donor kidney transplantation in Newcastle upon Tyne.	NA	NA	NA	NA	NA	NA	NA	NA	NA	NA	NA	NA	NA	NA	NA	NA	NA	NA	NA	NA	NA	NA	NA	Embase	2004360749	Asher J.F. Wilson C.H. Gupta A. Gok M.A. Talbot D.	Use of daclizumab in preventing delayed graft function in non-heart beating donor kidney transplantation in Newcastle upon Tyne.	Transplantationsmedizin: Organ der Deutschen Transplantationsgesellschaft. 16 (2) (pp 96-100), 2004. Date of Publication: 2004.	NA	NA
NA	Toni Ashton	Recent developments in the funding and organisation of the New Zealand health system	NA	NA	NA	NA	NA	NA	NA	NA	NA	NA	NA	NA	NCBI	Ashton, Toni			Recent developments in the funding and organisation of the New Zealand health system	NA	NA	NA	NA	NA	NA	NA	NA	NA	NA	NA	NA	NA	NA	NA	NA	NA	NA	NA	NA	Aust New Zealand Health Policy. 2005; 2: 9. Published online 2005 May 7. doi:??10.1186/1743-8462-2-9	PMC1142303	Ashton, Toni	NA	NA	NA	NA	NA	NA	NA
NA	A. Ashworth, R. G. Feachem	Interventions for the control of diarrhoeal diseases among young children: weaning education.	NA	NA	NA	NA	NA	NA	NA	NA	NA	NA	NA	NA	NCBI	Ashworth, A.; Feachem, R. G.			Interventions for the control of diarrhoeal diseases among young children: weaning education.	NA	NA	NA	NA	NA	NA	NA	NA	NA	NA	NA	NA	NA	NA	NA	NA	NA	NA	NA	NA	Bull World Health Organ. 1985; 63(6): 1115???1127.	PMC2536465	Ashworth, A.; Feachem, R. G.	NA	NA	NA	NA	NA	NA	NA
NA	NA	NA	NA	NA	NA	NA	NA	NA	NA	NA	NA	NA	NA	NA	Ovid	Askling, Berit 1; Lycke, Kirsten Hofgaard 2; Stave, Ola 3			INSTITUTIONAL LEADERSHIP AND LEEWAY - IMPORTANT ELEMENTS IN A NATIONAL SYSTEM OF QUALITY ASSURANCE AND ACCREDITATION: EXPERIENCES FROM A PILOT STUDY.[Article]	NA	NA	NA	NA	NA	NA	NA	NA	NA	NA	NA	NA	NA	NA	NA	NA	NA	NA	NA	NA	NA	NA	NA	Journals@Ovid Full Text	00130355-200410020-00003.	Askling, Berit 1; Lycke, Kirsten Hofgaard 2; Stave, Ola 3	INSTITUTIONAL LEADERSHIP AND LEEWAY - IMPORTANT ELEMENTS IN A NATIONAL SYSTEM OF QUALITY ASSURANCE AND ACCREDITATION: EXPERIENCES FROM A PILOT STUDY.[Article]	Tertiary Education & Management. 10(2):107-120, June 2004.	NA	RESEARCH ARTICLE: PDF Only.
NA	NA	NA	NA	NA	NA	NA	NA	NA	NA	NA	NA	NA	NA	NA	Ovid	Asoh, Kentaro 1; Hickey, Edward 2; Dorostkar, Parvin 1; Chaturvedi, Rajiv 1; Van Arsdel, Glen 2; Humpl, Tilman 1; Benson, Lee N 1			Outcomes of Emergent Cardiac Catheterization Following Pediatric Cardiac Surgery: O-12.[Abstract]	NA	NA	NA	NA	NA	NA	NA	NA	NA	NA	NA	NA	NA	NA	NA	NA	NA	NA	NA	NA	NA	NA	NA	Journals@Ovid Full Text	01445389-200806010-00044.	Asoh, Kentaro 1; Hickey, Edward 2; Dorostkar, Parvin 1; Chaturvedi, Rajiv 1; Van Arsdel, Glen 2; Humpl, Tilman 1; Benson, Lee N 1	Outcomes of Emergent Cardiac Catheterization Following Pediatric Cardiac Surgery: O-12.[Abstract]	Catheterization & Cardiovascular Interventions. 71(7):S5, June 1, 2008.	NA	PICS/AIC Abstract.
NA	Erinn E. Aspinall, Katherine Chew, Linda Watson, Mary Parker	A case study: planning a statewide information resource for health professionals: an evidence-based approach	NA	NA	NA	NA	NA	NA	NA	NA	NA	NA	NA	NA	NCBI	Aspinall, Erinn E.; Chew, Katherine; Watson, Linda; Parker, Mary			A case study: planning a statewide information resource for health professionals: an evidence-based approach	NA	NA	NA	NA	NA	NA	NA	NA	NA	NA	NA	NA	NA	NA	NA	NA	NA	NA	NA	NA	J Med Libr Assoc. 2009 October; 97(4): 246???252. doi:??10.3163/1536-5050.97.4.007	PMC2759152	Aspinall, Erinn E.; Chew, Katherine; Watson, Linda; Parker, Mary	NA	NA	NA	NA	NA	NA	NA
NA	NA	NA	NA	NA	NA	NA	NA	NA	NA	NA	NA	NA	NA	NA	Ovid	Asplund, Kjell 1; Asberg, Kerstin Hulter 2; Appelros, Peter 3; Bjarne, Daniela 4; Eriksson, Marie 1; Johansson, Asa 1; Jonsson, Fredrik 1; Norrving, Bo 5; Stegmayr, Birgitta 6; Terent, Andreas 7; Wallin, Sari 1; Wester, Per-Olov 1			The Riks-Stroke story: building a sustainable national register for quality assessment of stroke care.[Miscellaneous Article]	NA	NA	NA	NA	NA	NA	NA	NA	NA	NA	NA	NA	NA	NA	NA	NA	NA	NA	NA	NA	NA	NA	NA	Journals@Ovid Full Text	01253236-201104000-00003.	Asplund, Kjell 1; Asberg, Kerstin Hulter 2; Appelros, Peter 3; Bjarne, Daniela 4; Eriksson, Marie 1; Johansson, Asa 1; Jonsson, Fredrik 1; Norrving, Bo 5; Stegmayr, Birgitta 6; Terent, Andreas 7; Wallin, Sari 1; Wester, Per-Olov 1	The Riks-Stroke story: building a sustainable national register for quality assessment of stroke care.[Miscellaneous Article]	International Journal of Stroke. 6(2):99-108, April 2011.	NA	Research.
NA	NA	NA	NA	NA	NA	NA	NA	NA	NA	NA	NA	NA	NA	NA	Ovid	Asrani, S. K. *; Kim, W. R. *,+; Pedersen, R. A. ++; Charlton, M. R. *,+; Kremers, W. K. ++; Therneau, T. M. ++; Rosen, C. B. +; Dean, P. G. +			Daclizumab induction therapy in liver transplant recipients with renal insufficiency.[Article]	NA	NA	NA	NA	NA	NA	NA	NA	NA	NA	NA	NA	NA	NA	NA	NA	NA	NA	NA	NA	NA	NA	NA	Journals@Ovid Full Text	00001716-201009150-00008.	Asrani, S. K. *; Kim, W. R. *,+; Pedersen, R. A. ++; Charlton, M. R. *,+; Kremers, W. K. ++; Therneau, T. M. ++; Rosen, C. B. +; Dean, P. G. +	Daclizumab induction therapy in liver transplant recipients with renal insufficiency.[Article]	Alimentary Pharmacology & Therapeutics. 32(6):776-786, September 15, 2010.	NA	Original articles.
NA	M. de Assun????o-Franco, J. I. Hoffman, J. Harwood, W. Amos	MHC genotype and near-deterministic mortality in grey seals	NA	NA	NA	NA	NA	NA	NA	NA	NA	NA	NA	NA	NCBI	Assun????o-Franco, M. de; Hoffman, J. I.; Harwood, J.; Amos, W.			MHC genotype and near-deterministic mortality in grey seals	NA	NA	NA	NA	NA	NA	NA	NA	NA	NA	NA	NA	NA	NA	NA	NA	NA	NA	NA	NA	Sci Rep. 2012; 2: 659. Published online 2012 September 20. doi:??10.1038/srep00659	PMC3447382	Assun????o-Franco, M. de; Hoffman, J. I.; Harwood, J.; Amos, W.	NA	NA	NA	NA	NA	NA	NA
NA	Asthana, Anand N.	Entrepreneurship and human rights: Evidence from a natural experiment	AFRICAN JOURNAL OF BUSINESS MANAGEMENT	NA	NA	NA	NA	NA	NA	NA	5	NA	NA	NA	WebOfKnowledge	Asthana, Anand N.			Entrepreneurship and human rights: Evidence from a natural experiment	NA	NA	NA	NA	NA	23		852	NA		NA	1993-8233	NA	NA	NA	NA	NA	NA	NA	NA	NA	NA	NA	NA	NA	NA	NA	NA	NA	NA
NA	NA	NA	NA	NA	NA	NA	NA	NA	NA	NA	NA	NA	NA	NA	Ovid	Atagi K. Shimaoka H. Nishi S. Otsuka Y.			An adaptation of endotoxin adsorption therapy.	NA	NA	NA	NA	NA	NA	NA	NA	NA	NA	NA	NA	NA	NA	NA	NA	NA	NA	NA	NA	NA	NA	NA	Embase	70192334	Atagi K. Shimaoka H. Nishi S. Otsuka Y.	An adaptation of endotoxin adsorption therapy.	Critical Care Medicine. Conference: 39th Critical Care Congress of the Society of Critical Care Medicine's Miami Beach, FL United States. Conference Start: 20100109 Conference End: 20100113. Conference Publication: (var.pagings). 37 (12 SUPPL.) (pp A471), 2009. Date of Publication: December 2009.	NA	NA
NA	D J Atherton	Breast feeding and atopic eczema.	NA	NA	NA	NA	NA	NA	NA	NA	NA	NA	NA	NA	NCBI	Atherton, D J			Breast feeding and atopic eczema.	NA	NA	NA	NA	NA	NA	NA	NA	NA	NA	NA	NA	NA	NA	NA	NA	NA	NA	NA	NA	Br Med J (Clin Res Ed) 1983 September 17; 287(6395): 775???776.	PMC1549138	Atherton, D J	NA	NA	NA	NA	NA	NA	NA
NA	NA	NA	NA	NA	NA	NA	NA	NA	NA	NA	NA	NA	NA	NA	Ovid	Attar N. Tam L.E. McComb D.			Mechanical and physical properties of contemporary dental luting agents.	NA	NA	NA	NA	NA	NA	NA	NA	NA	NA	NA	NA	NA	NA	NA	NA	NA	NA	NA	NA	NA	NA	NA	Embase	12616231	Attar N. Tam L.E. McComb D.	Mechanical and physical properties of contemporary dental luting agents.	The Journal of prosthetic dentistry. 89 (2) (pp 127-134), 2003. Date of Publication: Feb 2003.	NA	NA
CD006424	Attridge Madeleine; Creamer John; Ramsden Michael; Cannings-John Rebecca; Hawthorne Kamila	Culturally appropriate health education for people in ethnic minority groups with type 2 diabetes mellitus	Cochrane Database of Systematic Reviews	2014	9	John Wiley & Sons, Ltd	Culture;Minority Groups;Diabetes Mellitus, Type 2 [ethnology] [therapy];Health Education [methods];Patient Education as Topic [methods];Randomized Controlled Trials as Topic;Socioeconomic Factors;Humans[checkword]	ENDOC	10.1002/14651858.CD006424.pub3	http://onlinelibrary.wiley.com/doi/10.1002/14651858.CD006424.pub3/abstract	NA	NA	NA	NA	Cochrane	Attridge Madeleine; Creamer John; Ramsden Michael; Cannings-John Rebecca; Hawthorne Kamila			Culturally appropriate health education for people in ethnic minority groups with type 2 diabetes mellitus	NA	NA	NA	NA	NA	NA	NA	NA	NA	NA	NA	NA	NA	NA	NA	NA	NA	NA	NA	NA	NA	NA	NA	NA	NA	NA	NA	NA	NA	NA
NA	NA	NA	NA	NA	NA	NA	NA	NA	NA	NA	NA	NA	NA	NA	Ovid	Aubry L.M. Cam E. Koons D.N. Monnat J.-Y. Pavard S.			Drivers of age-specific survival in a long-lived seabird: Contributions of observed and hidden sources of heterogeneity.	NA	NA	NA	NA	NA	NA	NA	NA	NA	NA	NA	NA	NA	NA	NA	NA	NA	NA	NA	NA	NA	NA	NA	Embase	21182519	Aubry L.M. Cam E. Koons D.N. Monnat J.-Y. Pavard S.	Drivers of age-specific survival in a long-lived seabird: Contributions of observed and hidden sources of heterogeneity.	Journal of Animal Ecology. 80 (2) (pp 375-383), 2011. Date of Publication: March 2011.	NA	NA
NA	Aubry, Lise M.; Cam, Emmanuelle; Monnat, Jean-Yves	Habitat Selection, Age-Specific Recruitment and Reproductive Success in a Long-Lived Seabird	MODELING DEMOGRAPHIC PROCESSES IN MARKED POPULATIONS	NA	NA	NA	NA	NA	NA	NA	3	NA	NA	NA	WebOfKnowledge	Aubry, Lise M.; Cam, Emmanuelle; Monnat, Jean-Yves			Habitat Selection, Age-Specific Recruitment and Reproductive Success in a Long-Lived Seabird	NA	NA	NA	NA	NA			498	NA		NA		NA	NA	NA	NA	NA	NA	NA	NA	NA	NA	NA	NA	NA	NA	NA	NA	NA	NA
NA	Aufderheide, MB; Park, HS; Hartouni, EP; Barnes, PD; Wright, DM; Bionta, RM; Zumbro, JD; Morris, CL	Proton radiography as a means of material characterization	NONDESTRUCTIVE CHARACTERIZATION OF MATERIALS IX	NA	NA	NA	NA	NA	NA	NA	86	NA	NA	NA	WebOfKnowledge	Aufderheide, MB; Park, HS; Hartouni, EP; Barnes, PD; Wright, DM; Bionta, RM; Zumbro, JD; Morris, CL			Proton radiography as a means of material characterization	NA	NA	NA	NA	NA		Amer Soc Nondestruct Testing; NASA, Langley Res Ctr; Natl Sci Fdn; USN, Off Res; USA, Res Off Far E; USAF, Asian Off Aerosp R&D; USN, Off Res Int Field Off Asia	717	NA	JUN 28-JUL 02, 1999	NA	0094-243X	NA	NA	NA	NA	NA	NA	NA	NA	NA	NA	NA	NA	NA	NA	NA	NA	NA	NA
NA	Aufderheide, MB; Slone, DM; von Wittenau, AES	HADES, a radiographic simulation code	REVIEW OF PROGRESS IN QUANTITATIVE NONDESTRUCTIVE EVALUATION, VOLS 20A AND 20B	NA	NA	NA	NA	NA	NA	NA	96	NA	NA	NA	WebOfKnowledge	Aufderheide, MB; Slone, DM; von Wittenau, AES			HADES, a radiographic simulation code	NA	NA	NA	NA	NA		Amer Soc Nondestruct Testing; FAA; Inst Phys Sci & Technol; NASA; Natl Sci Fdn	590	NA	JUL 16-20, 2000	NA		NA	NA	NA	NA	NA	NA	NA	NA	NA	NA	NA	NA	NA	NA	NA	NA	NA	NA
NA	Augier, P; Gasiorek, M	The welfare implications of trade liberalization between the Southern Mediterranean and the EU	APPLIED ECONOMICS	NA	NA	NA	NA	NA	NA	NA	31	NA	NA	NA	WebOfKnowledge	Augier, P; Gasiorek, M			The welfare implications of trade liberalization between the Southern Mediterranean and the EU	NA	NA	NA	NA	NA	10		76	NA		NA	6846-03-01	NA	NA	NA	NA	NA	NA	NA	NA	NA	NA	NA	NA	NA	NA	NA	NA	NA	NA
CD009186	Augustincic Polec Lana; Ueffing Erin; Welch Vivian; Tanjong Ghogomu Elizabeth; Pardo Pardo Jordi; Grabowsky Mark; Attaran Amir; Tugwell Peter	Strategies to increase the ownership and use of insecticide treated bednets to prevent malaria	Cochrane Database of Systematic Reviews	2011	6	John Wiley & Sons, Ltd	NA	EPOC	10.1002/14651858.CD009186	http://onlinelibrary.wiley.com/doi/10.1002/14651858.CD009186/abstract	NA	NA	NA	NA	Cochrane	Augustincic Polec Lana; Ueffing Erin; Welch Vivian; Tanjong Ghogomu Elizabeth; Pardo Pardo Jordi; Grabowsky Mark; Attaran Amir; Tugwell Peter			Strategies to increase the ownership and use of insecticide treated bednets to prevent malaria	NA	NA	NA	NA	NA	NA	NA	NA	NA	NA	NA	NA	NA	NA	NA	NA	NA	NA	NA	NA	NA	NA	NA	NA	NA	NA	NA	NA	NA	NA
NA	NA	NA	NA	NA	NA	NA	NA	NA	NA	NA	NA	NA	NA	NA	Ovid	Aull, Meredith J.; Suthanthiran, Manikkam			TRANSPLANTATION: Personalizing induction therapy in kidney transplantation.[Miscellaneous]	NA	NA	NA	NA	NA	NA	NA	NA	NA	NA	NA	NA	NA	NA	NA	NA	NA	NA	NA	NA	NA	NA	NA	Journals@Ovid Full Text	01429649-200911000-00014.	Aull, Meredith J.; Suthanthiran, Manikkam	TRANSPLANTATION: Personalizing induction therapy in kidney transplantation.[Miscellaneous]	Nature Reviews Nephrology. 5(11):619-620, November/December 2009.	NA	NEWS & VIEWS.
NA	Jessica Ausborn, Riyadh Mahmood, Abdeljabbar El Manira	Decoding the rules of recruitment of excitatory interneurons in the adult zebrafish locomotor network	NA	NA	NA	NA	NA	NA	NA	NA	NA	NA	NA	NA	NCBI	Ausborn, Jessica; Mahmood, Riyadh; Manira, Abdeljabbar El			Decoding the rules of recruitment of excitatory interneurons in the adult zebrafish locomotor network	NA	NA	NA	NA	NA	NA	NA	NA	NA	NA	NA	NA	NA	NA	NA	NA	NA	NA	NA	NA	Proc Natl Acad Sci U S A. 2012 December 26; 109(52): E3631???E3639. Published online 2012 December 11. doi:??10.1073/pnas.1216256110	PMC3535644	Ausborn, Jessica; Mahmood, Riyadh; Manira, Abdeljabbar El	NA	NA	NA	NA	NA	NA	NA
NA	NA	NA	NA	NA	NA	NA	NA	NA	NA	NA	NA	NA	NA	NA	Ovid	Austin L. Ewing G. Grande G.			Facilitating a shift to comprehensive carer-led assessment in palliative home care: The CSNAT approach.	NA	NA	NA	NA	NA	NA	NA	NA	NA	NA	NA	NA	NA	NA	NA	NA	NA	NA	NA	NA	NA	NA	NA	Embase	71484331	Austin L. Ewing G. Grande G.	Facilitating a shift to comprehensive carer-led assessment in palliative home care: The CSNAT approach.	Palliative Medicine. Conference: 8th World Research Congress of the European Association for Palliative Care, EAPC 2014 Lleida Spain. Conference Start: 20140605 Conference End: 20140607. Conference Publication: (var.pagings). 28 (6) (pp 612-613), 2014. Date of Publication: June 2014.	NA	NA
NA	NA	NA	NA	NA	NA	NA	NA	NA	NA	NA	NA	NA	NA	NA	Ovid	Austin, L 1,; Ewing, G 2; Grande, G 1			FACILITATING A SHIFT TO COMPREHENSIVE CARER-LED ASSESSMENT IN PALLIATIVE HOME CARE: THE CSNAT APPROACH.[Abstract]	NA	NA	NA	NA	NA	NA	NA	NA	NA	NA	NA	NA	NA	NA	NA	NA	NA	NA	NA	NA	NA	NA	NA	Journals@Ovid Full Text	01735169-201403000-00053.	Austin, L 1,; Ewing, G 2; Grande, G 1	FACILITATING A SHIFT TO COMPREHENSIVE CARER-LED ASSESSMENT IN PALLIATIVE HOME CARE: THE CSNAT APPROACH.[Abstract]	BMJ Supportive & Palliative Care. 4(1):114-115, March 2014.	NA	Marie Curie abstracts: Posters: PDF Only.
NA	I B Autenrieth, M Beer, E Bohn, S H Kaufmann, J Heesemann	Immune responses to Yersinia enterocolitica in susceptible BALB/c and resistant C57BL/6 mice: an essential role for gamma interferon.	NA	NA	NA	NA	NA	NA	NA	NA	NA	NA	NA	NA	NCBI	Autenrieth, I B; Beer, M; Bohn, E; Kaufmann, S H; Heesemann, J			Immune responses to Yersinia enterocolitica in susceptible BALB/c and resistant C57BL/6 mice: an essential role for gamma interferon.	NA	NA	NA	NA	NA	NA	NA	NA	NA	NA	NA	NA	NA	NA	NA	NA	NA	NA	NA	NA	Infect Immun. 1994 June; 62(6): 2590???2599.	PMC186549	Autenrieth, I B; Beer, M; Bohn, E; Kaufmann, S H; Heesemann, J	NA	NA	NA	NA	NA	NA	NA
NA	Stella E. Autenrieth, Philipp Warnke, Guido H. Wabnitz, Cecilia Lucero Estrada, Karina A. Pasquevich, Doreen Drechsler, Manina G?Ýnter, Kristin Hochweller, Ana Novakovic, Sandra Beer-Hammer, Yvonne Samstag, G?Ýnter J. H?mmerling, Natalio Garbi, Ingo B. Autenrieth	Depletion of Dendritic Cells Enhances Innate Anti-Bacterial Host Defense through Modulation of Phagocyte Homeostasis	NA	NA	NA	NA	NA	NA	NA	NA	NA	NA	NA	NA	NCBI	Autenrieth, Stella E.; Warnke, Philipp; Wabnitz, Guido H.; Estrada, Cecilia Lucero; Pasquevich, Karina A.; Drechsler, Doreen; G?Ýnter, Manina; Hochweller, Kristin; Novakovic, Ana; Beer-Hammer, Sandra; Samstag, Yvonne; H?mmerling, G?Ýnter J.; Garbi, Natalio; Autenrieth, Ingo B.			Depletion of Dendritic Cells Enhances Innate Anti-Bacterial Host Defense through Modulation of Phagocyte Homeostasis	NA	NA	NA	NA	NA	NA	NA	NA	NA	NA	NA	NA	NA	NA	NA	NA	NA	NA	NA	NA	PLoS Pathog. 2012 February; 8(2): e1002552. Published online 2012 February 23. doi:??10.1371/journal.ppat.1002552	PMC3285606	Autenrieth, Stella E.; Warnke, Philipp; Wabnitz, Guido H.; Estrada, Cecilia Lucero; Pasquevich, Karina A.; Drechsler, Doreen; G?Ýnter, Manina; Hochweller, Kristin; Novakovic, Ana; Beer-Hammer, Sandra; Samstag, Yvonne; H?mmerling, G?Ýnter J.; Garbi, Natalio; Autenrieth, Ingo B.	NA	NA	NA	NA	NA	NA	NA
NA	NA	NA	NA	NA	NA	NA	NA	NA	NA	NA	NA	NA	NA	NA	Ovid	AuthorsTask Force Members /; Hamm, Christian W. (Chairperson) (Germany); Bassand, Jean-Pierre (Co-Chairperson) (France); Agewall, Stefan (Norway); Bax, Jeroen (The Netherlands); Boersma, Eric (The Netherlands); Bueno, Hector (Spain); Caso, Pio (Italy); Dudek, Dariusz (Poland); Gielen, Stephan (Germany); Huber, Kurt (Austria); Ohman, Magnus (USA); Petrie, Mark C. (UK); Sonntag, Frank (Germany); Uv…			ESC Guidelines for the management of acute coronary syndromes in patients presenting without persistent ST-segment elevation: The Task Force for the management of acute coronary syndromes (ACS) in patients presenting without persistent ST-segment elevation of the European Society of Cardiology (ESC).[Miscellaneous Article]	NA	NA	NA	NA	NA	NA	NA	NA	NA	NA	NA	NA	NA	NA	NA	NA	NA	NA	NA	NA	NA	NA	NA	Journals@Ovid Full Text	00003628-201132230-00019.	AuthorsTask Force Members /; Hamm, Christian W. (Chairperson) (Germany); Bassand, Jean-Pierre (Co-Chairperson) (France); Agewall, Stefan (Norway); Bax, Jeroen (The Netherlands); Boersma, Eric (The Netherlands); Bueno, Hector (Spain); Caso, Pio (Italy); Dudek, Dariusz (Poland); Gielen, Stephan (Germany); Huber, Kurt (Austria); Ohman, Magnus (USA); Petrie, Mark C. (UK); Sonntag, Frank (Germany); Uv…	ESC Guidelines for the management of acute coronary syndromes in patients presenting without persistent ST-segment elevation: The Task Force for the management of acute coronary syndromes (ACS) in patients presenting without persistent ST-segment elevation of the European Society of Cardiology (ESC).[Miscellaneous Article]	European Heart Journal. 32(23):2999-3054, December 2011.	NA	ESC GUIDELINES: guidelines.
NA	NA	NA	NA	NA	NA	NA	NA	NA	NA	NA	NA	NA	NA	NA	Ovid	Avouris, Phaedon; Lyo, In-Whan			Observation of Quantum-Size Effects at Room Temperature on Metal Surfaces With STM.[Report]	NA	NA	NA	NA	NA	NA	NA	NA	NA	NA	NA	NA	NA	NA	NA	NA	NA	NA	NA	NA	NA	NA	NA	Journals@Ovid Full Text	00007529-199405130-00006.	Avouris, Phaedon; Lyo, In-Whan	Observation of Quantum-Size Effects at Room Temperature on Metal Surfaces With STM.[Report]	Science. 264(5161):942-945, May 13, 1994.	NA	Reports.
NA	NA	NA	NA	NA	NA	NA	NA	NA	NA	NA	NA	NA	NA	NA	Ovid	Aydin Z. Mallat M.J.K. Schaapherder A.F.M. Van Zonneveld A.J. Van Kooten C. Rabelink T.J. De Fijter J.W.			Randomized trial of short-course high-dose erythropoietin in donation after cardiac death kidney transplant recipients.	NA	NA	NA	NA	NA	NA	NA	NA	NA	NA	NA	NA	NA	NA	NA	NA	NA	NA	NA	NA	NA	NA	NA	Embase	2012379477	Aydin Z. Mallat M.J.K. Schaapherder A.F.M. Van Zonneveld A.J. Van Kooten C. Rabelink T.J. De Fijter J.W.	Randomized trial of short-course high-dose erythropoietin in donation after cardiac death kidney transplant recipients.	American Journal of Transplantation. 12 (7) (pp 1793-1800), 2012. Date of Publication: July 2012.	NA	NA
NA	??zge Z. Aydin, Jurgen A. Marteijn, Cristina Ribeiro-Silva, Aida Rodr?¥guez L?pez, Nils Wijgers, Godelieve Smeenk, Haico van Attikum, Raymond A. Poot, Wim Vermeulen, Hannes Lans	Human ISWI complexes are targeted by SMARCA5 ATPase and SLIDE domains to help resolve lesion-stalled transcription	NA	NA	NA	NA	NA	NA	NA	NA	NA	NA	NA	NA	NCBI	Aydin, ??zge Z.; Marteijn, Jurgen A.; Ribeiro-Silva, Cristina; L?pez, Aida Rodr?¥guez; Wijgers, Nils; Smeenk, Godelieve; Attikum, Haico van; Poot, Raymond A.; Vermeulen, Wim; Lans, Hannes			Human ISWI complexes are targeted by SMARCA5 ATPase and SLIDE domains to help resolve lesion-stalled transcription	NA	NA	NA	NA	NA	NA	NA	NA	NA	NA	NA	NA	NA	NA	NA	NA	NA	NA	NA	NA	Nucleic Acids Res. 2014 September 1; 42(13): 8473???8485. Published online 2014 July 2. doi:??10.1093/nar/gku565	PMC4117783	Aydin, ??zge Z.; Marteijn, Jurgen A.; Ribeiro-Silva, Cristina; L?pez, Aida Rodr?¥guez; Wijgers, Nils; Smeenk, Godelieve; Attikum, Haico van; Poot, Raymond A.; Vermeulen, Wim; Lans, Hannes	NA	NA	NA	NA	NA	NA	NA
NA	Mohammed Akli Ayoub, Jean-Philippe Pin	Interaction of Protease-Activated Receptor 2 with G Proteins and ?-Arrestin 1 Studied by Bioluminescence Resonance Energy Transfer	NA	NA	NA	NA	NA	NA	NA	NA	NA	NA	NA	NA	NCBI	Ayoub, Mohammed Akli; Pin, Jean-Philippe			Interaction of Protease-Activated Receptor 2 with G Proteins and ?-Arrestin 1 Studied by Bioluminescence Resonance Energy Transfer	NA	NA	NA	NA	NA	NA	NA	NA	NA	NA	NA	NA	NA	NA	NA	NA	NA	NA	NA	NA	Front Endocrinol (Lausanne) 2013; 4: 196. Prepublished online 2013 December 4. Published online 2013 December 20. doi:??10.3389/fendo.2013.00196	PMC3869048	Ayoub, Mohammed Akli; Pin, Jean-Philippe	NA	NA	NA	NA	NA	NA	NA
NA	NA	NA	NA	NA	NA	NA	NA	NA	NA	NA	NA	NA	NA	NA	ISRCTN	Ayres-de-Campos, Diogo	NA	NA	Evaluation of a computer system that alerts heathcare professionals to changes in foetal monitoring signals acquired during labour	NA	NA	NA	NA	NA	NA	NA	NA	NA	NA	NA	NA	NA	NA	NA	NA	NA	NA	NA	NA	NA	NA	NA	NA	NA	NA	Evaluation of a computer system that alerts heathcare professionals to changes in foetal monitoring signals acquired during labour	NA	NA	NA
NA	Ayres, Benjamin E.; Montgomery, Bruce S. I.; Barber, Neil J.; Pereira, Nicola; Langley, Stephen E. M.; Denham, Philippa; Bott, Simon R. J.	The role of transperineal template prostate biopsies in restaging men with prostate cancer managed by active surveillance	BJU INTERNATIONAL	NA	NA	NA	NA	NA	NA	NA	12	NA	21854535	NA	WebOfKnowledge	Ayres, Benjamin E.; Montgomery, Bruce S. I.; Barber, Neil J.; Pereira, Nicola; Langley, Stephen E. M.; Denham, Philippa; Bott, Simon R. J.			The role of transperineal template prostate biopsies in restaging men with prostate cancer managed by active surveillance	NA	NA	NA	NA	NA	8		70	NA		NA	1464-4096	NA	NA	NA	NA	NA	NA	NA	NA	NA	NA	NA	NA	NA	NA	NA	NA	NA	NA
NA	NA	NA	NA	NA	NA	NA	NA	NA	NA	NA	NA	NA	NA	NA	Ovid	Azar K.M. Aurora M. Wang E.J. Muzaffar A. Pressman A. Palaniappan L.P.			Virtual small groups for weight management: An innovative delivery mechanism for evidence-based lifestyle interventions.	NA	NA	NA	NA	NA	NA	NA	NA	NA	NA	NA	NA	NA	NA	NA	NA	NA	NA	NA	NA	NA	NA	NA	Embase	71447073	Azar K.M. Aurora M. Wang E.J. Muzaffar A. Pressman A. Palaniappan L.P.	Virtual small groups for weight management: An innovative delivery mechanism for evidence-based lifestyle interventions.	Circulation. Conference: American Heart Association's Epidemiology and Prevention/Nutrition, Physical Activity, and Metabolism 2014 Scientific Sessions San Francisco, CA United States. Conference Start: 20140318 Conference End: 20140321. Conference Publication: (var.pagings). 129 , 2014. Date of Publication: 25 Mar 2014.	NA	NA
NA	Noreen M. Aziz, Patricia A. Grady, J. Randall Curtis	Training and Career Development in Palliative Care and End-of-Life Research: Opportunities for Development in the United States	NA	NA	NA	NA	NA	NA	NA	NA	NA	NA	NA	NA	NCBI	Aziz, Noreen M.; Grady, Patricia A.; Curtis, J. Randall			Training and Career Development in Palliative Care and End-of-Life Research: Opportunities for Development in the United States	NA	NA	NA	NA	NA	NA	NA	NA	NA	NA	NA	NA	NA	NA	NA	NA	NA	NA	NA	NA	J Pain Symptom Manage. Author manuscript; available in PMC 2014 December 1.Published in final edited form as: J Pain Symptom Manage. 2013 December; 46(6): 10.1016/j.jpainsymman.2013.02.008. Published online 2013 April 28. doi:??10.1016/j.jpainsymman.2013.02.008	PMC3735668	Aziz, Noreen M.; Grady, Patricia A.; Curtis, J. Randall	NA	NA	NA	NA	NA	NA	NA
NA	NA	NA	NA	NA	NA	NA	NA	NA	NA	NA	NA	NA	NA	NA	Ovid	Azmoon, Shah MD *; Demarest, Caitlin MD *; Pucillo, Anthony L. MD *; Hjemdahl-Monsen, Craig MD *; Kay, Richard MD *; Ahmadi, Naser MD +; Aronow, Wilbert S. MD *; Frishman, William H. MD *			Neurologic and Cardiac Benefits of Therapeutic Hypothermia.[Review]	NA	NA	NA	NA	NA	NA	NA	NA	NA	NA	NA	NA	NA	NA	NA	NA	NA	NA	NA	NA	NA	NA	NA	Journals@Ovid Full Text	00045415-201105000-00002.	Azmoon, Shah MD *; Demarest, Caitlin MD *; Pucillo, Anthony L. MD *; Hjemdahl-Monsen, Craig MD *; Kay, Richard MD *; Ahmadi, Naser MD +; Aronow, Wilbert S. MD *; Frishman, William H. MD *	Neurologic and Cardiac Benefits of Therapeutic Hypothermia.[Review]	Cardiology in Review. 19(3):108-114, May/June 2011.	NA	Review Article.
NA	NA	NA	NA	NA	NA	NA	NA	NA	NA	NA	NA	NA	NA	NA	Ovid	Azzena G.F. Cirino E. Bacchini I. Agostini M. Fumarola A.			Round table on acute cholecystitis: emergency or delayed intervention.	NA	NA	NA	NA	NA	NA	NA	NA	NA	NA	NA	NA	NA	NA	NA	NA	NA	NA	NA	NA	NA	NA	NA	Embase	2710384	Azzena G.F. Cirino E. Bacchini I. Agostini M. Fumarola A.	Round table on acute cholecystitis: emergency or delayed intervention.	Minerva chirurgica. 44 (1-2) (pp 249-266), 1989. Date of Publication: 31 Jan 1989.	NA	NA
NA	NA	NA	NA	NA	NA	NA	NA	NA	NA	NA	NA	NA	NA	NA	Ovid	Ba E.K. Cisse B. Pitt C. Ndiaye J.L. Ndiaye M. Gomis J.F. Cairns M. Greenwood B.M. Sokhna C. Gaye O. Milligan P.J.			Extending the age range for seasonal malaria chemoprevention (SMC): Effectiveness of SMC in children under 10 years of age delivered through the district health service in Senegal.	NA	NA	NA	NA	NA	NA	NA	NA	NA	NA	NA	NA	NA	NA	NA	NA	NA	NA	NA	NA	NA	NA	NA	Embase	71693130	Ba E.K. Cisse B. Pitt C. Ndiaye J.L. Ndiaye M. Gomis J.F. Cairns M. Greenwood B.M. Sokhna C. Gaye O. Milligan P.J.	Extending the age range for seasonal malaria chemoprevention (SMC): Effectiveness of SMC in children under 10 years of age delivered through the district health service in Senegal.	American Journal of Tropical Medicine and Hygiene. Conference: 63rd Annual Meeting of the American Society of Tropical Medicine and Hygiene, ASTMH 2013 New Orleans, LA United States. Conference Start: 20141102 Conference End: 20141106. Conference Publication: (var.pagings). 91 (5 SUPPL. 1) (pp 583), 2014. Date of Publication: November 2014.	NA	NA
NA	NA	NA	NA	NA	NA	NA	NA	NA	NA	NA	NA	NA	NA	NA	Ovid	Babizhayev, Mark A. 1 2; Deyev, Anatoly I. 1; Yermakova, Valentina N. 2; Semiletov, Yuri A. 1; Davydova, Nina G. 2; Doroshenko, Valerii S. 1; Zhukotskii, Alexander V. 1; Goldman, Ita M. 1			Efficacy of N-Acetylcarnosine in the Treatment of Cataracts.[Article]	NA	NA	NA	NA	NA	NA	NA	NA	NA	NA	NA	NA	NA	NA	NA	NA	NA	NA	NA	NA	NA	NA	NA	Journals@Ovid Full Text	00126839-200203020-00004.	Babizhayev, Mark A. 1 2; Deyev, Anatoly I. 1; Yermakova, Valentina N. 2; Semiletov, Yuri A. 1; Davydova, Nina G. 2; Doroshenko, Valerii S. 1; Zhukotskii, Alexander V. 1; Goldman, Ita M. 1	Efficacy of N-Acetylcarnosine in the Treatment of Cataracts.[Article]	Drugs in R & D. 3(2):87-103, 2002.	NA	Original Research Article.
NA	NA	NA	NA	NA	NA	NA	NA	NA	NA	NA	NA	NA	NA	NA	Ovid	Babor, Thomas 1; Hall, Wayne 2; Humphreys, Keith 3,4; Miller, Peter 5; Petry, Nancy 6; West, Robert 7,8			Who is responsible for the public's health? The role of the alcohol industry in the WHO global strategy to reduce the harmful use of alcohol.[Editorial]	NA	NA	NA	NA	NA	NA	NA	NA	NA	NA	NA	NA	NA	NA	NA	NA	NA	NA	NA	NA	NA	NA	NA	Journals@Ovid Full Text	00008514-201312000-00001.	Babor, Thomas 1; Hall, Wayne 2; Humphreys, Keith 3,4; Miller, Peter 5; Petry, Nancy 6; West, Robert 7,8	Who is responsible for the public's health? The role of the alcohol industry in the WHO global strategy to reduce the harmful use of alcohol.[Editorial]	Addiction. 108(12):2045-2047, December 2013.	NA	EDITORIAL.
NA	BABU S C; PICCORELLI G O; SHAH P M; STEIN J H; CLAUSS R H	INCIDENCE AND RESULTS OF ARTERIAL COMPLICATIONS AMONG 16350 PATIENTS UNDERGOING CARDIAC CATHETERIZATION	Journal of Vascular Surgery	NA	NA	NA	NA	NA	NA	NA	4	NA	2788227	NA	WebOfKnowledge	BABU S C; PICCORELLI G O; SHAH P M; STEIN J H; CLAUSS R H			INCIDENCE AND RESULTS OF ARTERIAL COMPLICATIONS AMONG 16350 PATIENTS UNDERGOING CARDIAC CATHETERIZATION	NA	NA	NA	NA	NA	2		64	NA		NA	0741-5214	NA	NA	NA	NA	NA	NA	NA	NA	NA	NA	NA	NA	NA	NA	NA	NA	NA	NA
NA	NA	NA	NA	NA	NA	NA	NA	NA	NA	NA	NA	NA	NA	NA	Ovid	Babu, Benoy I. MRCS *; Genovese, Tiziana PhD +; Mazzon, Emanuela PhD ++; Riccardi, Luisa MD, PhD +; Paterniti, Irene BS +; Galuppo, Maria BS +; Crisafulli, Concetta PhD +; Siriwardena, Ajith K MD, FRCS *; Cuzzocrea, Salvatore PhD +			Recombinant Human Activated Protein C (Xigris) Attenuates Murine Cerulein-Induced Acute Pancreatitis Via Regulation of Nuclear Factor [kappa]B and Apoptotic Pathways.[Article]	NA	NA	NA	NA	NA	NA	NA	NA	NA	NA	NA	NA	NA	NA	NA	NA	NA	NA	NA	NA	NA	NA	NA	Journals@Ovid Full Text	00006676-201205000-00019.	Babu, Benoy I. MRCS *; Genovese, Tiziana PhD +; Mazzon, Emanuela PhD ++; Riccardi, Luisa MD, PhD +; Paterniti, Irene BS +; Galuppo, Maria BS +; Crisafulli, Concetta PhD +; Siriwardena, Ajith K MD, FRCS *; Cuzzocrea, Salvatore PhD +	Recombinant Human Activated Protein C (Xigris) Attenuates Murine Cerulein-Induced Acute Pancreatitis Via Regulation of Nuclear Factor [kappa]B and Apoptotic Pathways.[Article]	Pancreas. 41(4):619-628, May 2012.	NA	Original Articles.
NA	NA	NA	NA	NA	NA	NA	NA	NA	NA	NA	NA	NA	NA	NA	Ovid	Bacchieri G. Barros A.J.D. dos Santos J.V. Goncalves H. Gigante D.P.			A community intervention to prevent traffic accidents among bicycle commuters.	NA	NA	NA	NA	NA	NA	NA	NA	NA	NA	NA	NA	NA	NA	NA	NA	NA	NA	NA	NA	NA	NA	NA	Embase	20877924	Bacchieri G. Barros A.J.D. dos Santos J.V. Goncalves H. Gigante D.P.	A community intervention to prevent traffic accidents among bicycle commuters.	Revista de Saude Publica. 44 (5) (pp 867-875), 2010. Date of Publication: October 2010.	NA	NA
NA	NA	NA	NA	NA	NA	NA	NA	NA	NA	NA	NA	NA	NA	NA	Ovid	Bach G. Shah N.A. Mejia A. Weinzweig N. Brown A. Gonzalez M.H.			Upper extremity dog bite wounds and infections.	NA	NA	NA	NA	NA	NA	NA	NA	NA	NA	NA	NA	NA	NA	NA	NA	NA	NA	NA	NA	NA	NA	NA	Embase	16442016	Bach G. Shah N.A. Mejia A. Weinzweig N. Brown A. Gonzalez M.H.	Upper extremity dog bite wounds and infections.	Journal of surgical orthopaedic advances. 14 (4) (pp 181-184), 2005. Date of Publication: 2005 Winter.	NA	NA
NA	NA	NA	NA	NA	NA	NA	NA	NA	NA	NA	NA	NA	NA	NA	Ovid	Backhouse, Martin E.			Use of Randomised Controlled Trials for Producing Cost-Effectiveness Evidence: Potential Impact of Design Choices on Sample Size and Study Duration.[Article]	NA	NA	NA	NA	NA	NA	NA	NA	NA	NA	NA	NA	NA	NA	NA	NA	NA	NA	NA	NA	NA	NA	NA	Journals@Ovid Full Text	00019053-200220150-00003.	Backhouse, Martin E.	Use of Randomised Controlled Trials for Producing Cost-Effectiveness Evidence: Potential Impact of Design Choices on Sample Size and Study Duration.[Article]	Pharmacoeconomics. 20(15):1061-1077, 2002.	NA	Original Research Article.
NA	NA	NA	NA	NA	NA	NA	NA	NA	NA	NA	NA	NA	NA	NA	Ovid	Backinger, C L 1; Fagan, P 1; Matthews, E 1; Grana, R 2			Adolescent and young adult tobacco prevention and cessation: current status and future directions.[Review]	NA	NA	NA	NA	NA	NA	NA	NA	NA	NA	NA	NA	NA	NA	NA	NA	NA	NA	NA	NA	NA	NA	NA	Journals@Ovid Full Text	00061045-200312004-00008.	Backinger, C L 1; Fagan, P 1; Matthews, E 1; Grana, R 2	Adolescent and young adult tobacco prevention and cessation: current status and future directions.[Review]	Tobacco Control. 12 (Supplement IV):iv46-iv53, December 2003.	NA	REVIEW.
NA	NA	NA	NA	NA	NA	NA	NA	NA	NA	NA	NA	NA	NA	NA	Ovid	Backstrand, Jeffrey R *			Quantitative approaches to nutrient density for public health nutrition.[Article]	NA	NA	NA	NA	NA	NA	NA	NA	NA	NA	NA	NA	NA	NA	NA	NA	NA	NA	NA	NA	NA	NA	NA	Journals@Ovid Full Text	00124318-200306080-00014.	Backstrand, Jeffrey R *	Quantitative approaches to nutrient density for public health nutrition.[Article]	Public Health Nutrition. 6(8):829-837, December 2003.	NA	Research Article.
NA	Badenbroek, Ilse F.; Stol, Daphne M.; Nielen, Marcus M. J.; Hollander, Monika; Kraaijenhagen, Roderik A.; de Wit, G. Ardine; Schellevis, Francois G.; de Wit, Niek J.	Design of the INTEGRATE study: effectiveness and cost-effectiveness of a cardiometabolic risk assessment and treatment program integrated in primary care	BMC FAMILY PRACTICE	NA	NA	NA	NA	NA	NA	NA	13	NA	24884779	NA	WebOfKnowledge	Badenbroek, Ilse F.; Stol, Daphne M.; Nielen, Marcus M. J.; Hollander, Monika; Kraaijenhagen, Roderik A.; de Wit, G. Ardine; Schellevis, Francois G.; de Wit, Niek J.			Design of the INTEGRATE study: effectiveness and cost-effectiveness of a cardiometabolic risk assessment and treatment program integrated in primary care	NA	NA	NA	NA	NA			1	NA		NA	1471-2296	NA	NA	NA	NA	NA	NA	NA	NA	NA	NA	NA	NA	NA	NA	NA	NA	NA	NA
NA	NA	NA	NA	NA	NA	NA	NA	NA	NA	NA	NA	NA	NA	NA	Ovid	Badet, Lionel *,1; Lefrancois, Nicole 2; Morelon, Emmanuel 2; Brunet, Maria 2; Martin, Xavier 1			Quintuple immunosuppression in simultaneous pancreas-kidney transplantation: Result at 1 year: PP1621.[Abstract]	NA	NA	NA	NA	NA	NA	NA	NA	NA	NA	NA	NA	NA	NA	NA	NA	NA	NA	NA	NA	NA	NA	NA	Journals@Ovid Full Text	00060647-200709000-00556.	Badet, Lionel *,1; Lefrancois, Nicole 2; Morelon, Emmanuel 2; Brunet, Maria 2; Martin, Xavier 1	Quintuple immunosuppression in simultaneous pancreas-kidney transplantation: Result at 1 year: PP1621.[Abstract]	Xenotransplantation. 14(5):527, September 2007.	NA	CTS-IPITA-IXA 2007 Joint Conference Minneapolis - September 15-20, 2007: POSTER PRESENTATIONS: PP = Pancreas Transplantation: Results.
NA	NA	NA	NA	NA	NA	NA	NA	NA	NA	NA	NA	NA	NA	NA	Ovid	Badings E.A. The S.H.K. Dambrink J.-H.E. Van Wijngaarden J. Tjeerdsma G. Rasoul S. Timmer J.R. Van Der Wielen M.L.J. Lok D.J.A. Van't Hof A.W.J.			Early or late intervention in high-risk non-ST-elevation acute coronary syndromes: Results of the ELISA-3 trial.	NA	NA	NA	NA	NA	NA	NA	NA	NA	NA	NA	NA	NA	NA	NA	NA	NA	NA	NA	NA	NA	NA	NA	Embase	2013433811	Badings E.A. The S.H.K. Dambrink J.-H.E. Van Wijngaarden J. Tjeerdsma G. Rasoul S. Timmer J.R. Van Der Wielen M.L.J. Lok D.J.A. Van't Hof A.W.J.	Early or late intervention in high-risk non-ST-elevation acute coronary syndromes: Results of the ELISA-3 trial.	EuroIntervention. 9 (1) (pp 54-61), 2013. Date of Publication: 2013.	NA	NA
NA	NA	NA	NA	NA	NA	NA	NA	NA	NA	NA	NA	NA	NA	NA	Ovid	Baeten, Marlies 1*; Dochy, Filip 1; Struyven, Katrien 2			The effects of different learning environments on students' motivation for learning and their achievement.[Article]	NA	NA	NA	NA	NA	NA	NA	NA	NA	NA	NA	NA	NA	NA	NA	NA	NA	NA	NA	NA	NA	NA	NA	Journals@Ovid Full Text	00002314-201309000-00008.	Baeten, Marlies 1*; Dochy, Filip 1; Struyven, Katrien 2	The effects of different learning environments on students' motivation for learning and their achievement.[Article]	British Journal of Educational Psychology. 83(3):484-501, September 2013.	NA	Original Articles.
NA	NA	NA	NA	NA	NA	NA	NA	NA	NA	NA	NA	NA	NA	NA	Ovid	Bagai, Akshay MD, MHS a; Schulte, Phillip J. PhD b; Granger, Christopher B. MD b; Mahaffey, Kenneth W. MD b; Christenson, Robert H. PhD c; Bell, Gregory MD d; Lopes, Renato D. MD, MHS, PhD b; Green, Cynthia L. PhD b; Lincoff, Michael A. MD e; Armstrong, Paul W. MD f; Roe, Matthew T. MD, MHS b,*			Prognostic implications of creatine kinase-MB measurements in ST-segment elevation myocardial infarction patients treated with primary percutaneous coronary intervention.[Article]	NA	NA	NA	NA	NA	NA	NA	NA	NA	NA	NA	NA	NA	NA	NA	NA	NA	NA	NA	NA	NA	NA	NA	Journals@Ovid Full Text	00000406-201410000-00013.	Bagai, Akshay MD, MHS a; Schulte, Phillip J. PhD b; Granger, Christopher B. MD b; Mahaffey, Kenneth W. MD b; Christenson, Robert H. PhD c; Bell, Gregory MD d; Lopes, Renato D. MD, MHS, PhD b; Green, Cynthia L. PhD b; Lincoff, Michael A. MD e; Armstrong, Paul W. MD f; Roe, Matthew T. MD, MHS b,*	Prognostic implications of creatine kinase-MB measurements in ST-segment elevation myocardial infarction patients treated with primary percutaneous coronary intervention.[Article]	American Heart Journal. 168(4):503-511e2, October 2014.	NA	Clinical Investigation: Acute Ischemic Heart Disease.
NA	NA	NA	NA	NA	NA	NA	NA	NA	NA	NA	NA	NA	NA	NA	Ovid	Bagai, Akshay; Dangas, George D.; Stone, Gregg W.; Granger, Christopher B.			Reperfusion Strategies in Acute Coronary Syndromes.[Miscellaneous Article]	NA	NA	NA	NA	NA	NA	NA	NA	NA	NA	NA	NA	NA	NA	NA	NA	NA	NA	NA	NA	NA	NA	NA	Journals@Ovid Full Text	00003012-201406060-00007.	Bagai, Akshay; Dangas, George D.; Stone, Gregg W.; Granger, Christopher B.	Reperfusion Strategies in Acute Coronary Syndromes.[Miscellaneous Article]	Circulation Research. 114(12):1918-1928, June 6, 2014.	NA	Acute Coronary Syndromes Compendium.
NA	NA	NA	NA	NA	NA	NA	NA	NA	NA	NA	NA	NA	NA	NA	Ovid	Bagavathiannan, Muthukumar V.; Gulden, Robert H.; Van Acker, Rene C. *			The Ability of Alfalfa (Medicago sativa) to Establish in a Seminatural Habitat under Different Seed Dispersal Times and Disturbance.[Article]	NA	NA	NA	NA	NA	NA	NA	NA	NA	NA	NA	NA	NA	NA	NA	NA	NA	NA	NA	NA	NA	NA	NA	Journals@Ovid Full Text	00010887-201107000-00007.	Bagavathiannan, Muthukumar V.; Gulden, Robert H.; Van Acker, Rene C. *	The Ability of Alfalfa (Medicago sativa) to Establish in a Seminatural Habitat under Different Seed Dispersal Times and Disturbance.[Article]	Weed Science. 59(3):314-320, July 2011.	NA	Article.
NA	Mohammad Bagherirad, Damoon Entesari-Tatafi, Sam Mirzaee, Allan Appelbe, Chenghon Yap, Eugene Athan	A case of Kingella kingae endocarditis complicated by native mitral valve rupture	NA	NA	NA	NA	NA	NA	NA	NA	NA	NA	NA	NA	NCBI	Bagherirad, Mohammad; Entesari-Tatafi, Damoon; Mirzaee, Sam; Appelbe, Allan; Yap, Chenghon; Athan, Eugene			A case of Kingella kingae endocarditis complicated by native mitral valve rupture	NA	NA	NA	NA	NA	NA	NA	NA	NA	NA	NA	NA	NA	NA	NA	NA	NA	NA	NA	NA	Australas Med J. 2013; 6(4): 172???174. Published online 2013 April 30. doi:??10.4066/AMJ.2013.1577	PMC3650306	Bagherirad, Mohammad; Entesari-Tatafi, Damoon; Mirzaee, Sam; Appelbe, Allan; Yap, Chenghon; Athan, Eugene	NA	NA	NA	NA	NA	NA	NA
NA	NA	NA	NA	NA	NA	NA	NA	NA	NA	NA	NA	NA	NA	NA	Ovid	Bagot, Kathleen L. 1; Bove, Liliana L. 2; Masser, Barbara M. 1; White, Katherine M. 3			Asking for something different from our donors: factors influencing persuasion success.[Miscellaneous Article]	NA	NA	NA	NA	NA	NA	NA	NA	NA	NA	NA	NA	NA	NA	NA	NA	NA	NA	NA	NA	NA	NA	NA	Journals@Ovid Full Text	00007885-201403020-00016.	Bagot, Kathleen L. 1; Bove, Liliana L. 2; Masser, Barbara M. 1; White, Katherine M. 3	Asking for something different from our donors: factors influencing persuasion success.[Miscellaneous Article]	Transfusion. 54(3pt2):848-855, March 2014.	NA	DONOR RECRUITMENT AND MOTIVATION.
NA	Shumei Bai, Shilian Liu, Xuxiao Guo, Zhaoyu Qin, Banqin Wang, Xiaohong Li, Yanjiang Qin, Yi-Hsin Liu	Proteome analysis of biomarkers in the cerebrospinal fluid of neuromyelitis optica patients	NA	NA	NA	NA	NA	NA	NA	NA	NA	NA	NA	NA	NCBI	Bai, Shumei; Liu, Shilian; Guo, Xuxiao; Qin, Zhaoyu; Wang, Banqin; Li, Xiaohong; Qin, Yanjiang; Liu, Yi-Hsin			Proteome analysis of biomarkers in the cerebrospinal fluid of neuromyelitis optica patients	NA	NA	NA	NA	NA	NA	NA	NA	NA	NA	NA	NA	NA	NA	NA	NA	NA	NA	NA	NA	Mol Vis. 2009; 15: 1638???1648. Published online 2009 August 19.	PMC2730746	Bai, Shumei; Liu, Shilian; Guo, Xuxiao; Qin, Zhaoyu; Wang, Banqin; Li, Xiaohong; Qin, Yanjiang; Liu, Yi-Hsin	NA	NA	NA	NA	NA	NA	NA
NA	NA	NA	NA	NA	NA	NA	NA	NA	NA	NA	NA	NA	NA	NA	Ovid	Baig M.H.A. Kauser S.H.			Disseminated intravascular coagulation and death due to snake bite.	NA	NA	NA	NA	NA	NA	NA	NA	NA	NA	NA	NA	NA	NA	NA	NA	NA	NA	NA	NA	NA	NA	NA	Embase	71669516	Baig M.H.A. Kauser S.H.	Disseminated intravascular coagulation and death due to snake bite.	Indian Journal of Hematology and Blood Transfusion. Conference: 55th Annual Conference of Indian Society of Hematology and Blood Transfusion, Haematocon 2014 Hyderabad India. Conference Start: 20141106 Conference End: 20141108. Conference Publication: (var.pagings). 30 (2 SUPPL. 1) (pp 514), 2014. Date of Publication: November 2014.	NA	NA
NA	NA	NA	NA	NA	NA	NA	NA	NA	NA	NA	NA	NA	NA	NA	Ovid	Baijal P.K. Clow E.P. Fitzpatrick D.W. Bird R.P.			Tumor-enhancing effects of cholic acid are exerted on the early stages of colon carcinogenesis via induction of aberrant crypt foci with an enhanced growth phenotype.	NA	NA	NA	NA	NA	NA	NA	NA	NA	NA	NA	NA	NA	NA	NA	NA	NA	NA	NA	NA	NA	NA	NA	Embase	1999192448	Baijal P.K. Clow E.P. Fitzpatrick D.W. Bird R.P.	Tumor-enhancing effects of cholic acid are exerted on the early stages of colon carcinogenesis via induction of aberrant crypt foci with an enhanced growth phenotype.	Canadian Journal of Physiology and Pharmacology. 76 (12) (pp 1095-1102), 1998. Date of Publication: 1998.	NA	NA
NA	NA	NA	NA	NA	NA	NA	NA	NA	NA	NA	NA	NA	NA	NA	Ovid	Bailet L.L. Repper K.K. Piasta S.B. Murphy S.P.			Emergent literacy intervention for prekindergarteners at risk for reading failure.	NA	NA	NA	NA	NA	NA	NA	NA	NA	NA	NA	NA	NA	NA	NA	NA	NA	NA	NA	NA	NA	NA	NA	Embase	19398614	Bailet L.L. Repper K.K. Piasta S.B. Murphy S.P.	Emergent literacy intervention for prekindergarteners at risk for reading failure.	Journal of Learning Disabilities. 42 (4) (pp 336-355), 2009. Date of Publication: July/August 2009.	NA	NA
NA	NA	NA	NA	NA	NA	NA	NA	NA	NA	NA	NA	NA	NA	NA	Ovid	Bailey F.A. Williams B.R. Woodby L.L. Goode P.S. Redden D.T. Houston T.K. Granstaff U.S. Johnson T.M. Pennypacker L.C. Haddock K.S. Painter J.M. Spencer J.M. Hartney T. Burgio K.L.			Intervention to improve care at life's end in inpatient settings: The BEACON trial.	NA	NA	NA	NA	NA	NA	NA	NA	NA	NA	NA	NA	NA	NA	NA	NA	NA	NA	NA	NA	NA	NA	NA	Embase	2014371752	Bailey F.A. Williams B.R. Woodby L.L. Goode P.S. Redden D.T. Houston T.K. Granstaff U.S. Johnson T.M. Pennypacker L.C. Haddock K.S. Painter J.M. Spencer J.M. Hartney T. Burgio K.L.	Intervention to improve care at life's end in inpatient settings: The BEACON trial.	Journal of General Internal Medicine. 29 (6) (pp 836-843), 2014. Date of Publication: June 2014.	NA	NA
NA	NA	NA	NA	NA	NA	NA	NA	NA	NA	NA	NA	NA	NA	NA	Ovid	Bailey I.W. Archer L.			The impact of the introduction of treated water on aspects of community health in a rural community in Kwazulu-Natal, South Africa.	NA	NA	NA	NA	NA	NA	NA	NA	NA	NA	NA	NA	NA	NA	NA	NA	NA	NA	NA	NA	NA	NA	NA	Embase	2004367618	Bailey I.W. Archer L.	The impact of the introduction of treated water on aspects of community health in a rural community in Kwazulu-Natal, South Africa.	Water Science and Technology. 50 (1) (pp 105-110), 2004. Date of Publication: 2004.	NA	NA
NA	NA	NA	NA	NA	NA	NA	NA	NA	NA	NA	NA	NA	NA	NA	Ovid	Bainbridge J. Khirwadkar H. Hourihan M.D.			Vomiting - Is this a good indication for CT head scans in patients with minor head injury?.	NA	NA	NA	NA	NA	NA	NA	NA	NA	NA	NA	NA	NA	NA	NA	NA	NA	NA	NA	NA	NA	NA	NA	Embase	2012108307	Bainbridge J. Khirwadkar H. Hourihan M.D.	Vomiting - Is this a good indication for CT head scans in patients with minor head injury?.	British Journal of Radiology. 85 (1010) (pp 183-186), 2012. Date of Publication: February 2012.	NA	NA
NA	NA	NA	NA	NA	NA	NA	NA	NA	NA	NA	NA	NA	NA	NA	Ovid	Bainey K.R. Gafni A. Rao-Melacini P. Tong W. Steg P.G. Faxon D.P. Lamy A. Granger C.B. Yusuf S. Mehta S.R.			The cost implications of an early versus delayed invasive strategy in acute coronary syndromes: The TIMACS study.	NA	NA	NA	NA	NA	NA	NA	NA	NA	NA	NA	NA	NA	NA	NA	NA	NA	NA	NA	NA	NA	NA	NA	Embase	2014341830	Bainey K.R. Gafni A. Rao-Melacini P. Tong W. Steg P.G. Faxon D.P. Lamy A. Granger C.B. Yusuf S. Mehta S.R.	The cost implications of an early versus delayed invasive strategy in acute coronary syndromes: The TIMACS study.	Journal of Medical Economics. 17 (6) (pp 415-422), 2014. Date of Publication: June 2014.	NA	NA
NA	NA	NA	NA	NA	NA	NA	NA	NA	NA	NA	NA	NA	NA	NA	Ovid	Bains, A. 1; Pakseresht, M. 1; Roache, C. 1; Beck, L. 2; Sheehy, T. 3; Gittelsohn, J. 4; Corriveau, A. 5; Sharma, S. 1			Healthy Foods North improves diet among Inuit and Inuvialuit women of childbearing age in Arctic Canada.[Article]	NA	NA	NA	NA	NA	NA	NA	NA	NA	NA	NA	NA	NA	NA	NA	NA	NA	NA	NA	NA	NA	NA	NA	Journals@Ovid Full Text	00009862-201404002-00022.	Bains, A. 1; Pakseresht, M. 1; Roache, C. 1; Beck, L. 2; Sheehy, T. 3; Gittelsohn, J. 4; Corriveau, A. 5; Sharma, S. 1	Healthy Foods North improves diet among Inuit and Inuvialuit women of childbearing age in Arctic Canada.[Article]	Journal of Human Nutrition & Dietetics. 27 (Supplement 2):175-185, April 2014.	NA	Research Paper: The British Dietetic Association Ltd and Wiley have published this supplement without financial support; PUBLIC HEALTH NUTRITION AND EPIDEMIOLOGY.
NA	Gianluca Baio, Rumana Omar, Gareth Ambler	Comparative evaluation of the stepped wedge design efficiency	NA	NA	NA	NA	NA	NA	NA	NA	NA	NA	NA	NA	NCBI	Baio, Gianluca; Omar, Rumana; Ambler, Gareth			Comparative evaluation of the stepped wedge design efficiency	NA	NA	NA	NA	NA	NA	NA	NA	NA	NA	NA	NA	NA	NA	NA	NA	NA	NA	NA	NA	Trials. 2013; 14(Suppl 1): O46. Published online 2013 November 29. doi:??10.1186/1745-6215-14-S1-O46	PMC3981510	Baio, Gianluca; Omar, Rumana; Ambler, Gareth	NA	NA	NA	NA	NA	NA	NA
NA	NA	NA	NA	NA	NA	NA	NA	NA	NA	NA	NA	NA	NA	NA	Ovid	BAIRACTARIS, CHRISOSTOMOS MD, PHD 1,*; STOURAITIS, GEORGIOS MD 1; PAPALIAS, ELIAS MD 1; FAKAS, NIKOLAOS MD 1; PAPATHEODOROU, GEORGIOS PHD 2; GOURTZELIDIS, PAVLOS MD, PHD 1,3			EARLY NEUROPHYSIOLOGICAL EVOLUTION OF CHRONIC INFLAMMATORY DEMYELINATING POLYNEUROPATHY IN A PATIENT WITH HASHIMOTO'S THYROIDITIS.[Miscellaneous]	NA	NA	NA	NA	NA	NA	NA	NA	NA	NA	NA	NA	NA	NA	NA	NA	NA	NA	NA	NA	NA	NA	NA	Journals@Ovid Full Text	01445484-200811000-00017.	BAIRACTARIS, CHRISOSTOMOS MD, PHD 1,*; STOURAITIS, GEORGIOS MD 1; PAPALIAS, ELIAS MD 1; FAKAS, NIKOLAOS MD 1; PAPATHEODOROU, GEORGIOS PHD 2; GOURTZELIDIS, PAVLOS MD, PHD 1,3	EARLY NEUROPHYSIOLOGICAL EVOLUTION OF CHRONIC INFLAMMATORY DEMYELINATING POLYNEUROPATHY IN A PATIENT WITH HASHIMOTO'S THYROIDITIS.[Miscellaneous]	Muscle & Nerve. 38(5):1518-1522, November 2008.	NA	Case of the Month: Cases of the Month.
NA	NA	NA	NA	NA	NA	NA	NA	NA	NA	NA	NA	NA	NA	NA	Ovid	Bajjoka, Iman 1; Hsaiky, Lama 1; Hegeman, Rozelle 1; Brown, Kimberly 1; Abouljoud, Marwan 1			SUSTAINED BENEFIT OF THYMOGLOBULIN INDUCTION IN PRESERVING RENAL FUNCTION IN LIVER TRANSPLANT RECIPIENTS.: Abstract# 423.[Abstract]	NA	NA	NA	NA	NA	NA	NA	NA	NA	NA	NA	NA	NA	NA	NA	NA	NA	NA	NA	NA	NA	NA	NA	Journals@Ovid Full Text	00024798-200608001-00423.	Bajjoka, Iman 1; Hsaiky, Lama 1; Hegeman, Rozelle 1; Brown, Kimberly 1; Abouljoud, Marwan 1	SUSTAINED BENEFIT OF THYMOGLOBULIN INDUCTION IN PRESERVING RENAL FUNCTION IN LIVER TRANSPLANT RECIPIENTS.: Abstract# 423.[Abstract]	American Journal of Transplantation. 6 (Suppl. 2):208-209, August 2006.	NA	WORLD TRANSPLANT CONGRESS 2006 ORAL ABSTRACT: CONCURRENT SESSION 36: AVOIDING COMPLICATIONS FROM IMMUNOSUPPRESSION IN LIVER TRANSPLANT RECIPIENTS.
NA	NA	NA	NA	NA	NA	NA	NA	NA	NA	NA	NA	NA	NA	NA	Ovid	Baker A.L. Beck A. Britton B. Carter G. Bauer J. Wratten C. Wolfenden L. McElduff P. Thornton L.			Alcohol, tobacco use and readiness to change in an australian sample of head and neck cancer patients undergoing radiotherapy.	NA	NA	NA	NA	NA	NA	NA	NA	NA	NA	NA	NA	NA	NA	NA	NA	NA	NA	NA	NA	NA	NA	NA	Embase	70911232	Baker A.L. Beck A. Britton B. Carter G. Bauer J. Wratten C. Wolfenden L. McElduff P. Thornton L.	Alcohol, tobacco use and readiness to change in an australian sample of head and neck cancer patients undergoing radiotherapy.	Asia-Pacific Journal of Clinical Oncology. Conference: COSA 39th Annual Scientific Meeting and IPOS 14th World Congress of Psycho-Oncology Brisbane, QLD Australia. Conference Start: 20121111 Conference End: 20121115. Conference Publication: (var.pagings). 8 (pp 340), 2012. Date of Publication: November 2012.	NA	NA
CD008366	Baker Philip RA; Francis Daniel P; Soares Jesus; Weightman Alison L; Foster Charles	Community wide interventions for increasing physical activity	Cochrane Database of Systematic Reviews	2015	1	John Wiley & Sons, Ltd	Exercise;Program Development;Cities;Cultural Characteristics;Health Plan Implementation [methods];Health Promotion [methods];Humans[checkword]	PUBHLTH	10.1002/14651858.CD008366.pub3	http://onlinelibrary.wiley.com/doi/10.1002/14651858.CD008366.pub3/abstract	NA	NA	NA	NA	Cochrane	Baker Philip RA; Francis Daniel P; Soares Jesus; Weightman Alison L; Foster Charles			Community wide interventions for increasing physical activity	NA	NA	NA	NA	NA	NA	NA	NA	NA	NA	NA	NA	NA	NA	NA	NA	NA	NA	NA	NA	NA	NA	NA	NA	NA	NA	NA	NA	NA	NA
NA	NA	NA	NA	NA	NA	NA	NA	NA	NA	NA	NA	NA	NA	NA	Ovid	Baker, Bruce L.; Feinfield, Kristin Abbott			Early intervention.[Miscellaneous]	NA	NA	NA	NA	NA	NA	NA	NA	NA	NA	NA	NA	NA	NA	NA	NA	NA	NA	NA	NA	NA	NA	NA	Journals@Ovid Full Text	00001504-200309000-00003.	Baker, Bruce L.; Feinfield, Kristin Abbott	Early intervention.[Miscellaneous]	Current Opinion in Psychiatry. 16(5):503-509, September 2003.	NA	Developmental disorders.
NA	NA	NA	NA	NA	NA	NA	NA	NA	NA	NA	NA	NA	NA	NA	Ovid	Baker, David W. MD, MPH 1,2; Persell, Stephen D. MD, MPH 1,2			Criteria for Waiver of Informed Consent for Quality Improvement Research.[Letter]	NA	NA	NA	NA	NA	NA	NA	NA	NA	NA	NA	NA	NA	NA	NA	NA	NA	NA	NA	NA	NA	NA	NA	Journals@Ovid Full Text	01714638-201501000-00037.	Baker, David W. MD, MPH 1,2; Persell, Stephen D. MD, MPH 1,2	Criteria for Waiver of Informed Consent for Quality Improvement Research.[Letter]	JAMA Internal Medicine. 175(1):142-143, January 2015.	NA	Letter: Comment & Response.
NA	NA	NA	NA	NA	NA	NA	NA	NA	NA	NA	NA	NA	NA	NA	Ovid	Baker, Dean *; Park, Christina; Sweeney, Carol; McCormack, Lacey; Durkin, Maureen; Brenner, Ruth; Dabelea, Dana; Entwisle, Barbara			Recruitment of Women in the National Children's Study Initial Vanguard Study.[Miscellaneous Article]	NA	NA	NA	NA	NA	NA	NA	NA	NA	NA	NA	NA	NA	NA	NA	NA	NA	NA	NA	NA	NA	NA	NA	Journals@Ovid Full Text	00000429-201406010-00011.	Baker, Dean *; Park, Christina; Sweeney, Carol; McCormack, Lacey; Durkin, Maureen; Brenner, Ruth; Dabelea, Dana; Entwisle, Barbara	Recruitment of Women in the National Children's Study Initial Vanguard Study.[Miscellaneous Article]	American Journal of Epidemiology. 179(11):1366-1374, June 1, 2014.	NA	PRACTICE OF EPIDEMIOLOGY.
NA	Erin L. Baker, Muhammad H. Zaman	The Biomechanical Integrin	NA	NA	NA	NA	NA	NA	NA	NA	NA	NA	NA	NA	NCBI	Baker, Erin L.; Zaman, Muhammad H.			The Biomechanical Integrin	NA	NA	NA	NA	NA	NA	NA	NA	NA	NA	NA	NA	NA	NA	NA	NA	NA	NA	NA	NA	J Biomech. Author manuscript; available in PMC 2011 January 5.Published in final edited form as: J Biomech. 2010 January 5; 43(1): 38. Published online 2009 October 6. doi:??10.1016/j.jbiomech.2009.09.007	PMC2813321	Baker, Erin L.; Zaman, Muhammad H.	NA	NA	NA	NA	NA	NA	NA
NA	Timothy B Baker, David H Gustafson, Dhavan Shah	How Can Research Keep Up With eHealth? Ten Strategies for Increasing the Timeliness and Usefulness of eHealth Research	NA	NA	NA	NA	NA	NA	NA	NA	NA	NA	NA	NA	NCBI	Baker, Timothy B; Gustafson, David H; Shah, Dhavan			How Can Research Keep Up With eHealth? Ten Strategies for Increasing the Timeliness and Usefulness of eHealth Research	NA	NA	NA	NA	NA	NA	NA	NA	NA	NA	NA	NA	NA	NA	NA	NA	NA	NA	NA	NA	J Med Internet Res. 2014 February; 16(2): e36. Published online 2014 February 19. doi:??10.2196/jmir.2925	PMC3961695	Baker, Timothy B; Gustafson, David H; Shah, Dhavan	NA	NA	NA	NA	NA	NA	NA
NA	NA	NA	NA	NA	NA	NA	NA	NA	NA	NA	NA	NA	NA	NA	Ovid	BAKKER, BOUDEWIJN; OOSTDIJK, WILMA; GESKUS, RONALD B.; STOKVIS-BRANTSMA, W HENRIETTE; VOSSEN, JAAK M.; WIT, JAN M.			Patterns of Growth and Body Proportions After Total-Body Irradiation and Hematopoietic Stem Cell Transplantation During Childhood.[Article]	NA	NA	NA	NA	NA	NA	NA	NA	NA	NA	NA	NA	NA	NA	NA	NA	NA	NA	NA	NA	NA	NA	NA	Journals@Ovid Full Text	00006450-200602000-00019.	BAKKER, BOUDEWIJN; OOSTDIJK, WILMA; GESKUS, RONALD B.; STOKVIS-BRANTSMA, W HENRIETTE; VOSSEN, JAAK M.; WIT, JAN M.	Patterns of Growth and Body Proportions After Total-Body Irradiation and Hematopoietic Stem Cell Transplantation During Childhood.[Article]	Pediatric Research. 59(2):259-264, February 2006.	NA	Original Articles: Clinical Investigations.
NA	NA	NA	NA	NA	NA	NA	NA	NA	NA	NA	NA	NA	NA	NA	Ovid	Bakker, M F; Jacobs, J W G; Verstappen, S M M; Bijlsma, J W J			Tight control in the treatment of rheumatoid arthritis: efficacy and feasibility.[Miscellaneous Article]	NA	NA	NA	NA	NA	NA	NA	NA	NA	NA	NA	NA	NA	NA	NA	NA	NA	NA	NA	NA	NA	NA	NA	Journals@Ovid Full Text	00000652-200711003-00012.	Bakker, M F; Jacobs, J W G; Verstappen, S M M; Bijlsma, J W J	Tight control in the treatment of rheumatoid arthritis: efficacy and feasibility.[Miscellaneous Article]	Annals of the Rheumatic Diseases. 66 (Supplement 3):iii56-iii60, November 2007.	NA	SUPPLEMENT.
NA	NA	NA	NA	NA	NA	NA	NA	NA	NA	NA	NA	NA	NA	NA	Ovid	Bakr M.A.			Induction therapy.	NA	NA	NA	NA	NA	NA	NA	NA	NA	NA	NA	NA	NA	NA	NA	NA	NA	NA	NA	NA	NA	NA	NA	Embase	15989677	Bakr M.A.	Induction therapy.	Experimental and clinical transplantation : official journal of the Middle East Society for Organ Transplantation. 3 (1) (pp 320-328), 2005. Date of Publication: Jun 2005.	NA	NA
NA	NA	NA	NA	NA	NA	NA	NA	NA	NA	NA	NA	NA	NA	NA	Ovid	Baks (Akdeniz), B. Guniz DDS, PhD a[latin dotless i]; Eyubo[Latin capital letter G with caron]lu, Tan Frat DDS b[latin dotless i]; Sen, Bilge Hakan DDS, PhD c; Erdilek, Necdet DDS, PhD c			The effect of three different sealers on the radiopacity of root fillings in simulated canals.[Miscellaneous]	NA	NA	NA	NA	NA	NA	NA	NA	NA	NA	NA	NA	NA	NA	NA	NA	NA	NA	NA	NA	NA	NA	NA	Journals@Ovid Full Text	00043790-200701000-00029.	Baks (Akdeniz), B. Guniz DDS, PhD a[latin dotless i]; Eyubo[Latin capital letter G with caron]lu, Tan Frat DDS b[latin dotless i]; Sen, Bilge Hakan DDS, PhD c; Erdilek, Necdet DDS, PhD c	The effect of three different sealers on the radiopacity of root fillings in simulated canals.[Miscellaneous]	Oral Surgery, Oral Medicine, Oral Pathology, Oral Radiology, & Endodontics. 103(1):138-141, January 2007.	NA	ENDODONTOLOGY.
NA	NA	NA	NA	NA	NA	NA	NA	NA	NA	NA	NA	NA	NA	NA	Ovid	Baksi B.G. Ermis R.B.			Comparison of conventional and digital radiography for radiometric differentiation of dental cements.	NA	NA	NA	NA	NA	NA	NA	NA	NA	NA	NA	NA	NA	NA	NA	NA	NA	NA	NA	NA	NA	NA	NA	Embase	17873973	Baksi B.G. Ermis R.B.	Comparison of conventional and digital radiography for radiometric differentiation of dental cements.	Quintessence international (Berlin, Germany : 1985). 38 (9) (pp e532-536), 2007. Date of Publication: Oct 2007.	NA	NA
NA	NA	NA	NA	NA	NA	NA	NA	NA	NA	NA	NA	NA	NA	NA	Ovid	Baksi B.G. Sen B.H. Eyuboglu T.F.			Differences in Aluminum Equivalent Values of Endodontic Sealers: Conventional Versus Digital Radiography.	NA	NA	NA	NA	NA	NA	NA	NA	NA	NA	NA	NA	NA	NA	NA	NA	NA	NA	NA	NA	NA	NA	NA	Embase	18718374	Baksi B.G. Sen B.H. Eyuboglu T.F.	Differences in Aluminum Equivalent Values of Endodontic Sealers: Conventional Versus Digital Radiography.	Journal of Endodontics. 34 (9) (pp 1101-1104), 2008. Date of Publication: September 2008.	NA	NA
NA	Geni Balaban, Maria Eug?¡nia Farias Almeida Motta, Giselia Alves Pontes Silva	Early weaning and other potential risk factors for overweight among preschool children	NA	NA	NA	NA	NA	NA	NA	NA	NA	NA	NA	NA	NCBI	Balaban, Geni; Motta, Maria Eug?¡nia Farias Almeida; Silva, Giselia Alves Pontes			Early weaning and other potential risk factors for overweight among preschool children	NA	NA	NA	NA	NA	NA	NA	NA	NA	NA	NA	NA	NA	NA	NA	NA	NA	NA	NA	NA	Clinics (Sao Paulo) 2010 February; 65(2): 181???187. doi:??10.1590/S1807-59322010000200010	PMC2827705	Balaban, Geni; Motta, Maria Eug?¡nia Farias Almeida; Silva, Giselia Alves Pontes	NA	NA	NA	NA	NA	NA	NA
NA	Chinthaka Balasooriya, Joel Rhee, Boaz Shulruf, Rosa Canalese, Nicholas Zwar	Evaluating the Guideline Enhancement Tool (GET): an innovative clinical training tool to enhance the use of hypertension guidelines in general practice	NA	NA	NA	NA	NA	NA	NA	NA	NA	NA	NA	NA	NCBI	Balasooriya, Chinthaka; Rhee, Joel; Shulruf, Boaz; Canalese, Rosa; Zwar, Nicholas			Evaluating the Guideline Enhancement Tool (GET): an innovative clinical training tool to enhance the use of hypertension guidelines in general practice	NA	NA	NA	NA	NA	NA	NA	NA	NA	NA	NA	NA	NA	NA	NA	NA	NA	NA	NA	NA	BMC Med Educ. 2014; 14: 1046. Published online 2014 December 30. doi:??10.1186/s12909-014-0273-2	PMC4318171	Balasooriya, Chinthaka; Rhee, Joel; Shulruf, Boaz; Canalese, Rosa; Zwar, Nicholas	NA	NA	NA	NA	NA	NA	NA
NA	P Baldelli, N Phelan, G Egan	Investigation of the effect of anode/filter materials on the dose and image quality of a digital mammography system based on an amorphous selenium flat panel detector	NA	NA	NA	NA	NA	NA	NA	NA	NA	NA	NA	NA	NCBI	Baldelli, P; Phelan, N; Egan, G			Investigation of the effect of anode/filter materials on the dose and image quality of a digital mammography system based on an amorphous selenium flat panel detector	NA	NA	NA	NA	NA	NA	NA	NA	NA	NA	NA	NA	NA	NA	NA	NA	NA	NA	NA	NA	Br J Radiol. 2010 April; 83(988): 290???295. doi:??10.1259/bjr/60404532	PMC3473454	Baldelli, P; Phelan, N; Egan, G	NA	NA	NA	NA	NA	NA	NA
NA	NA	NA	NA	NA	NA	NA	NA	NA	NA	NA	NA	NA	NA	NA	Ovid	Baldi, J. V. 1; Bernardes, R. A. 1; Duarte, M. A. H. 1; Ordinola-Zapata, R. 1; Cavenago, B. C. 1; Moraes, J. C. S. 2; de Moraes, I. G. 1			Variability of physicochemical properties of an epoxy resin sealer taken from different parts of the same tube.[Article]	NA	NA	NA	NA	NA	NA	NA	NA	NA	NA	NA	NA	NA	NA	NA	NA	NA	NA	NA	NA	NA	NA	NA	Journals@Ovid Full Text	00004310-201210000-00004.	Baldi, J. V. 1; Bernardes, R. A. 1; Duarte, M. A. H. 1; Ordinola-Zapata, R. 1; Cavenago, B. C. 1; Moraes, J. C. S. 2; de Moraes, I. G. 1	Variability of physicochemical properties of an epoxy resin sealer taken from different parts of the same tube.[Article]	International Endodontic Journal. 45(10):915-920, October 2012.	NA	Original Scientific Articles.
NA	Baldi, Mario; De Martin, Juan Carlos; Masala, Enrico; Vesco, Andrea	Quality-oriented video transmission with pipeline forwarding	IEEE TRANSACTIONS ON BROADCASTING	NA	NA	NA	NA	NA	NA	NA	54	NA	NA	NA	WebOfKnowledge	Baldi, Mario; De Martin, Juan Carlos; Masala, Enrico; Vesco, Andrea			Quality-oriented video transmission with pipeline forwarding	NA	NA	NA	NA	NA	3		619	NA		NA	0018-9316	NA	NA	NA	NA	NA	NA	NA	NA	NA	NA	NA	NA	NA	NA	NA	NA	NA	NA
NA	NA	NA	NA	NA	NA	NA	NA	NA	NA	NA	NA	NA	NA	NA	Ovid	Balducci, A 1; Rike, A H 1; Alloway, R R 1; Cardi, M 2; Clippard, M 1; Weimert, N 1; Thomas, M 1; Munda, R 2; Tevar, A 1; Woodle, E S 1			T CELL DEPLETING ANTIBODY INDUCTION AND DELAYED CALCINEURIN INHIBITOR INTRODUCTION IN EARLY CORTICOSTEROID WITHDRAWAL REGIMENS: AN ANALYSIS: Abstract# 1737 Poster Board #-Session: P64-II.[Abstract]	NA	NA	NA	NA	NA	NA	NA	NA	NA	NA	NA	NA	NA	NA	NA	NA	NA	NA	NA	NA	NA	NA	NA	Journals@Ovid Full Text	00024798-200608001-01743.	Balducci, A 1; Rike, A H 1; Alloway, R R 1; Cardi, M 2; Clippard, M 1; Weimert, N 1; Thomas, M 1; Munda, R 2; Tevar, A 1; Woodle, E S 1	T CELL DEPLETING ANTIBODY INDUCTION AND DELAYED CALCINEURIN INHIBITOR INTRODUCTION IN EARLY CORTICOSTEROID WITHDRAWAL REGIMENS: AN ANALYSIS: Abstract# 1737 Poster Board #-Session: P64-II.[Abstract]	American Journal of Transplantation. 6 (Suppl. 2):645, August 2006.	NA	WORLD TRANSPLANT CONGRESS 2006 POSTER ABSTRACTS: KIDNEY TRANSPLANTATION: CLINICAL/REJECTION.
NA	NA	NA	NA	NA	NA	NA	NA	NA	NA	NA	NA	NA	NA	NA	Ovid	BALDWIN, T. 1; SAKTHIANANDESWAREN, A. 1; CURTIS, J. M. 1; KUMAR, B. 2; SMYTH, G. K. 1; FOOTE, S. J. 3; HANDMAN, E. 1			Wound healing response is a major contributor to the severity of cutaneous leishmaniasis in the ear model of infection.[Article]	NA	NA	NA	NA	NA	NA	NA	NA	NA	NA	NA	NA	NA	NA	NA	NA	NA	NA	NA	NA	NA	NA	NA	Journals@Ovid Full Text	00006406-200710000-00002.	BALDWIN, T. 1; SAKTHIANANDESWAREN, A. 1; CURTIS, J. M. 1; KUMAR, B. 2; SMYTH, G. K. 1; FOOTE, S. J. 3; HANDMAN, E. 1	Wound healing response is a major contributor to the severity of cutaneous leishmaniasis in the ear model of infection.[Article]	Parasite Immunology. 29(10):501-513, October 2007.	NA	Original Paper.
NA	NA	NA	NA	NA	NA	NA	NA	NA	NA	NA	NA	NA	NA	NA	Ovid	Ballard, Dustin MD			Screened & Examined: Can It Be True? EHRs Make EPs' Lives Better.[Miscellaneous]	NA	NA	NA	NA	NA	NA	NA	NA	NA	NA	NA	NA	NA	NA	NA	NA	NA	NA	NA	NA	NA	NA	NA	Journals@Ovid Full Text	00132981-201311061-00001.	Ballard, Dustin MD	Screened & Examined: Can It Be True? EHRs Make EPs' Lives Better.[Miscellaneous]	Emergency Medicine News. 35(11A) (Supplement 1), November 6, 2013.	NA	Screened & Examined.
NA	NA	NA	NA	NA	NA	NA	NA	NA	NA	NA	NA	NA	NA	NA	Ovid	Ballard, Dustin W. MD, MBE a,b,*; Reed, Mary E. DrPH b; Huang, Jie PhD b; Kramer, Barbara J. RN, MBA b; Hsu, John MD, MBA, MSCE b; Chettipally, Uli MD, MPH a,b			Does primary stroke center certification change ED diagnosis, utilization, and disposition of patients with acute stroke?[white star],[white star][white star].[Article]	NA	NA	NA	NA	NA	NA	NA	NA	NA	NA	NA	NA	NA	NA	NA	NA	NA	NA	NA	NA	NA	NA	NA	Journals@Ovid Full Text	00001832-201209000-00022.	Ballard, Dustin W. MD, MBE a,b,*; Reed, Mary E. DrPH b; Huang, Jie PhD b; Kramer, Barbara J. RN, MBA b; Hsu, John MD, MBA, MSCE b; Chettipally, Uli MD, MPH a,b	Does primary stroke center certification change ED diagnosis, utilization, and disposition of patients with acute stroke?[white star],[white star][white star].[Article]	American Journal of Emergency Medicine. 30(7):1152-1162, September 2012.	NA	Original Contribution.
NA	NA	NA	NA	NA	NA	NA	NA	NA	NA	NA	NA	NA	NA	NA	Ovid	Balmer, Paul; Borrow, Ray +			Serologic correlates of protection for evaluating the response to meningococcal vaccines.[Review]	NA	NA	NA	NA	NA	NA	NA	NA	NA	NA	NA	NA	NA	NA	NA	NA	NA	NA	NA	NA	NA	NA	NA	Journals@Ovid Full Text	00149348-200402000-00009.	Balmer, Paul; Borrow, Ray +	Serologic correlates of protection for evaluating the response to meningococcal vaccines.[Review]	Expert Review of Vaccines. 3(1):77-87, February 2004.	NA	Review.
NA	NA	NA	NA	NA	NA	NA	NA	NA	NA	NA	NA	NA	NA	NA	Ovid	Balmford, James 1; Swift, Elena 1; Borland, Ron 1			Reported Planning Before and After Quitting and Quit Success: Retrospective Data From the ITC 4-Country Survey .[Report]	NA	NA	NA	NA	NA	NA	NA	NA	NA	NA	NA	NA	NA	NA	NA	NA	NA	NA	NA	NA	NA	NA	NA	Journals@Ovid Full Text	00011970-201409000-00029.	Balmford, James 1; Swift, Elena 1; Borland, Ron 1	Reported Planning Before and After Quitting and Quit Success: Retrospective Data From the ITC 4-Country Survey .[Report]	Psychology of Addictive Behaviors. 28(3):899-906, September 2014.	NA	BRIEF REPORTS: Nicotine.
NA	NA	NA	NA	NA	NA	NA	NA	NA	NA	NA	NA	NA	NA	NA	Ovid	Balon, Jennifer MSN, RN, CRNP 1; Thomas, Stephanie A. PharmD, BCPS, CDE 2			Comparison of Hospital Admission Medication Lists With Primary Care Physician and Outpatient Pharmacy Lists.[Miscellaneous Article]	NA	NA	NA	NA	NA	NA	NA	NA	NA	NA	NA	NA	NA	NA	NA	NA	NA	NA	NA	NA	NA	NA	NA	Journals@Ovid Full Text	00128195-201109000-00010.	Balon, Jennifer MSN, RN, CRNP 1; Thomas, Stephanie A. PharmD, BCPS, CDE 2	Comparison of Hospital Admission Medication Lists With Primary Care Physician and Outpatient Pharmacy Lists.[Miscellaneous Article]	Journal of Nursing Scholarship. 43(3):292-300, September 2011.	NA	HEALTH POLICY AND SYSTEMS: HEALTH POLICY AND SYSTEMS.
NA	NA	NA	NA	NA	NA	NA	NA	NA	NA	NA	NA	NA	NA	NA	Ovid	Bamford, J. A. 1; Putman, C. T. 1,2; Mushahwar, V. K. 1,3			Intraspinal microstimulation preferentially recruits fatigue-resistant muscle fibres and generates gradual force in rat.[Article]	NA	NA	NA	NA	NA	NA	NA	NA	NA	NA	NA	NA	NA	NA	NA	NA	NA	NA	NA	NA	NA	NA	NA	Journals@Ovid Full Text	00005245-200512150-00015.	Bamford, J. A. 1; Putman, C. T. 1,2; Mushahwar, V. K. 1,3	Intraspinal microstimulation preferentially recruits fatigue-resistant muscle fibres and generates gradual force in rat.[Article]	Journal of Physiology. 569(3):873-884, December 15, 2005.	NA	TISSUE, SYSTEM AND ORGAN PHYSIOLOGY: Research Paper.
NA	NA	NA	NA	NA	NA	NA	NA	NA	NA	NA	NA	NA	NA	NA	Ovid	Banas C.A. Erskine A.R. Sun S. Retchin S.M.			Phased implementation of electronic health records through an office of clinical transformation.	NA	NA	NA	NA	NA	NA	NA	NA	NA	NA	NA	NA	NA	NA	NA	NA	NA	NA	NA	NA	NA	NA	NA	Embase	2011541104	Banas C.A. Erskine A.R. Sun S. Retchin S.M.	Phased implementation of electronic health records through an office of clinical transformation.	Journal of the American Medical Informatics Association. 18 (5) (pp 721-725), 2011. Date of Publication: September 2011.	NA	NA
NA	NA	NA	NA	NA	NA	NA	NA	NA	NA	NA	NA	NA	NA	NA	Ovid	Banerjee, A. 1; Chatterjee, S. 1,2			SPHERICAL COLLAPSE OF A HEAT CONDUCTING FLUID IN HIGHER DIMENSIONS WITHOUT HORIZON.[Article]	NA	NA	NA	NA	NA	NA	NA	NA	NA	NA	NA	NA	NA	NA	NA	NA	NA	NA	NA	NA	NA	NA	NA	Journals@Ovid Full Text	00008810-200529930-00002.	Banerjee, A. 1; Chatterjee, S. 1,2	SPHERICAL COLLAPSE OF A HEAT CONDUCTING FLUID IN HIGHER DIMENSIONS WITHOUT HORIZON.[Article]	Astrophysics & Space Science. 299(3):219-225, July 2005.	NA	RESEARCH ARTICLE: PDF Only.
NA	Soma Banerjee, Stephanie Smith, Ji-Hyun Oum, Hung-Jiun Liaw, Ji-Young Hwang, Nilabja Sikdar, Akira Motegi, Sang Eun Lee, Kyungjae Myung	Mph1p promotes gross chromosomal rearrangement through partial inhibition of homologous recombination	NA	NA	NA	NA	NA	NA	NA	NA	NA	NA	NA	NA	NCBI	Banerjee, Soma; Smith, Stephanie; Oum, Ji-Hyun; Liaw, Hung-Jiun; Hwang, Ji-Young; Sikdar, Nilabja; Motegi, Akira; Lee, Sang Eun; Myung, Kyungjae			Mph1p promotes gross chromosomal rearrangement through partial inhibition of homologous recombination	NA	NA	NA	NA	NA	NA	NA	NA	NA	NA	NA	NA	NA	NA	NA	NA	NA	NA	NA	NA	J Cell Biol. 2008 June 30; 181(7): 1083???1093. doi:??10.1083/jcb.200711146	PMC2442200	Banerjee, Soma; Smith, Stephanie; Oum, Ji-Hyun; Liaw, Hung-Jiun; Hwang, Ji-Young; Sikdar, Nilabja; Motegi, Akira; Lee, Sang Eun; Myung, Kyungjae	NA	NA	NA	NA	NA	NA	NA
NA	Banga, Franyke R.; Truijens, Sophie E. M.; Fransen, Annemarie F.; Dieleman, Jeanne P.; Heimel, Pieter J. van Runnard; Oei, Guid S.	The impact of transmural multiprofessional simulation-based obstetric team training on perinatal outcome and quality of care in the Netherlands	BMC MEDICAL EDUCATION	NA	NA	NA	NA	NA	NA	NA	11	NA	25145317	NA	WebOfKnowledge	Banga, Franyke R.; Truijens, Sophie E. M.; Fransen, Annemarie F.; Dieleman, Jeanne P.; Heimel, Pieter J. van Runnard; Oei, Guid S.			The impact of transmural multiprofessional simulation-based obstetric team training on perinatal outcome and quality of care in the Netherlands	NA	NA	NA	NA	NA			1	NA		NA	1472-6920	NA	NA	NA	NA	NA	NA	NA	NA	NA	NA	NA	NA	NA	NA	NA	NA	NA	NA
NA	C. H. Bangma, S. Roemeling, F. H. Schr??der	Overdiagnosis and overtreatment of early detected prostate cancer	NA	NA	NA	NA	NA	NA	NA	NA	NA	NA	NA	NA	NCBI	Bangma, C. H.; Roemeling, S.; Schr??der, F. H.			Overdiagnosis and overtreatment of early detected prostate cancer	NA	NA	NA	NA	NA	NA	NA	NA	NA	NA	NA	NA	NA	NA	NA	NA	NA	NA	NA	NA	World J Urol. 2007 March; 25(1): 3???9. Published online 2007 February 14. doi:??10.1007/s00345-007-0145-z	PMC1913182	Bangma, C. H.; Roemeling, S.; Schr??der, F. H.	NA	NA	NA	NA	NA	NA	NA
NA	NA	NA	NA	NA	NA	NA	NA	NA	NA	NA	NA	NA	NA	NA	Ovid	Bankhead, Charles			Still Waiting on Watchful Waiting: Clinical Trials Test Surveillance.[Miscellaneous]	NA	NA	NA	NA	NA	NA	NA	NA	NA	NA	NA	NA	NA	NA	NA	NA	NA	NA	NA	NA	NA	NA	NA	Journals@Ovid Full Text	00005042-200311190-00009.	Bankhead, Charles	Still Waiting on Watchful Waiting: Clinical Trials Test Surveillance.[Miscellaneous]	Journal of the National Cancer Institute. 95(22):1657-1659, November 19, 2003.	NA	NEWS.
NA	Shweta Bansal, Babak Pourbohloul, Lauren Ancel Meyers	A Comparative Analysis of Influenza Vaccination Programs	NA	NA	NA	NA	NA	NA	NA	NA	NA	NA	NA	NA	NCBI	Bansal, Shweta; Pourbohloul, Babak; Meyers, Lauren Ancel			A Comparative Analysis of Influenza Vaccination Programs	NA	NA	NA	NA	NA	NA	NA	NA	NA	NA	NA	NA	NA	NA	NA	NA	NA	NA	NA	NA	PLoS Med. 2006 October; 3(10): e387. Published online 2006 October 3. doi:??10.1371/journal.pmed.0030387	PMC1584413	Bansal, Shweta; Pourbohloul, Babak; Meyers, Lauren Ancel	NA	NA	NA	NA	NA	NA	NA
NA	NA	NA	NA	NA	NA	NA	NA	NA	NA	NA	NA	NA	NA	NA	Ovid	Banz, Vanessa MD *; Gsponer, Thomas PhD +; Candinas, Daniel MD, FRCS *; Guller, Ulrich MD, MHS *			Population-Based Analysis of 4113 Patients With Acute Cholecystitis: Defining the Optimal Time-Point for Laparoscopic Cholecystectomy.[Article]	NA	NA	NA	NA	NA	NA	NA	NA	NA	NA	NA	NA	NA	NA	NA	NA	NA	NA	NA	NA	NA	NA	NA	Journals@Ovid Full Text	00000658-201112000-00020.	Banz, Vanessa MD *; Gsponer, Thomas PhD +; Candinas, Daniel MD, FRCS *; Guller, Ulrich MD, MHS *	Population-Based Analysis of 4113 Patients With Acute Cholecystitis: Defining the Optimal Time-Point for Laparoscopic Cholecystectomy.[Article]	Annals of Surgery. 254(6):964-970, December 2011.	NA	Original Articles.
NA	Ting Bao, Nancy E. Davidson	How We Maintain Bone Health in Early-Stage Breast Cancer Patients on Aromatase Inhibitors	NA	NA	NA	NA	NA	NA	NA	NA	NA	NA	NA	NA	NCBI	Bao, Ting; Davidson, Nancy E.			How We Maintain Bone Health in Early-Stage Breast Cancer Patients on Aromatase Inhibitors	NA	NA	NA	NA	NA	NA	NA	NA	NA	NA	NA	NA	NA	NA	NA	NA	NA	NA	NA	NA	J Oncol Pract. 2007 November; 3(6): 323???325. doi:??10.1200/JOP.0768501	PMC2793755	Bao, Ting; Davidson, Nancy E.	NA	NA	NA	NA	NA	NA	NA
NA	Yunhe Bao, Xuetong Shen	INO80 subfamily of Chromatin Remodeling Complexes	NA	NA	NA	NA	NA	NA	NA	NA	NA	NA	NA	NA	NCBI	Bao, Yunhe; Shen, Xuetong			INO80 subfamily of Chromatin Remodeling Complexes	NA	NA	NA	NA	NA	NA	NA	NA	NA	NA	NA	NA	NA	NA	NA	NA	NA	NA	NA	NA	Mutat Res. Author manuscript; available in PMC 2009 June 19.Published in final edited form as: Mutat Res. 2007 May 1; 618(1-2): 18???29. Published online 2007 January 21. doi:??10.1016/j.mrfmmm.2006.10.006	PMC2699258	Bao, Yunhe; Shen, Xuetong	NA	NA	NA	NA	NA	NA	NA
NA	NA	NA	NA	NA	NA	NA	NA	NA	NA	NA	NA	NA	NA	NA	Ovid	Baqui, Abdullah H. MBBS, MPH, DrPH *+; Arifeen, Shams E. MBBS, PhD +; Williams, Emma K. MHS *; Ahmed, Saifuddin MBBS, PhD ++; Mannan, Ishtiaq MBBS, MSc +; Rahman, Syed M. MBBS, DCH, MSc +; Begum, Nazma MA, DCS +; Seraji, Habibur R. MBBS, MSc [S]; Winch, Peter J. MD, MPH *; Santosham, Mathuram MD, MPH *; Black, Robert E. MD, MPH [P]; Darmstadt, Gary L. MS, MD *			Effectiveness of Home-Based Management of Newborn Infections by Community Health Workers in Rural Bangladesh.[Article]	NA	NA	NA	NA	NA	NA	NA	NA	NA	NA	NA	NA	NA	NA	NA	NA	NA	NA	NA	NA	NA	NA	NA	Journals@Ovid Full Text	00006454-200904000-00010.	Baqui, Abdullah H. MBBS, MPH, DrPH *+; Arifeen, Shams E. MBBS, PhD +; Williams, Emma K. MHS *; Ahmed, Saifuddin MBBS, PhD ++; Mannan, Ishtiaq MBBS, MSc +; Rahman, Syed M. MBBS, DCH, MSc +; Begum, Nazma MA, DCS +; Seraji, Habibur R. MBBS, MSc [S]; Winch, Peter J. MD, MPH *; Santosham, Mathuram MD, MPH *; Black, Robert E. MD, MPH [P]; Darmstadt, Gary L. MS, MD *	Effectiveness of Home-Based Management of Newborn Infections by Community Health Workers in Rural Bangladesh.[Article]	Pediatric Infectious Disease Journal. 28(4):304-310, April 2009.	NA	Original Studies.
NA	Sarah J Bar-Zeev, Sue G Kruske, Lesley M Barclay, Naor Bar-Zeev, Sue V Kildea	Adherence to management guidelines for growth faltering and anaemia in remote dwelling Australian Aboriginal infants and barriers to health service delivery	NA	NA	NA	NA	NA	NA	NA	NA	NA	NA	NA	NA	NCBI	Bar-Zeev, Sarah J; Kruske, Sue G; Barclay, Lesley M; Bar-Zeev, Naor; Kildea, Sue V			Adherence to management guidelines for growth faltering and anaemia in remote dwelling Australian Aboriginal infants and barriers to health service delivery	NA	NA	NA	NA	NA	NA	NA	NA	NA	NA	NA	NA	NA	NA	NA	NA	NA	NA	NA	NA	BMC Health Serv Res. 2013; 13: 250. Published online 2013 July 3. doi:??10.1186/1472-6963-13-250	PMC3750842	Bar-Zeev, Sarah J; Kruske, Sue G; Barclay, Lesley M; Bar-Zeev, Naor; Kildea, Sue V	NA	NA	NA	NA	NA	NA	NA
NA	Barchiesi, Franco	South African debates on the basic income grant: Wage labour and the post-apartheid social policy	JOURNAL OF SOUTHERN AFRICAN STUDIES	NA	NA	NA	NA	NA	NA	NA	28	NA	NA	NA	WebOfKnowledge	Barchiesi, Franco			South African debates on the basic income grant: Wage labour and the post-apartheid social policy	NA	NA	NA	NA	NA	3		628	NA		NA	0305-7070	NA	NA	NA	NA	NA	NA	NA	NA	NA	NA	NA	NA	NA	NA	NA	NA	NA	NA
NA	NA	NA	NA	NA	NA	NA	NA	NA	NA	NA	NA	NA	NA	NA	Ovid	Barclay, G. R.; Walker, B.; Gibson, J.; McColl, K.; Turner, M. L.			Quality assurance by a commercial flow cytometry method of leucodepletion of whole blood donations: initial application of universal testing and proposals for a batch-release sampling plan.[Article]	NA	NA	NA	NA	NA	NA	NA	NA	NA	NA	NA	NA	NA	NA	NA	NA	NA	NA	NA	NA	NA	NA	NA	Journals@Ovid Full Text	00010826-200003000-00006.	Barclay, G. R.; Walker, B.; Gibson, J.; McColl, K.; Turner, M. L.	Quality assurance by a commercial flow cytometry method of leucodepletion of whole blood donations: initial application of universal testing and proposals for a batch-release sampling plan.[Article]	Transfusion Medicine. 10(1):37-48, March 2000.	NA	Original Articles.
NA	Naomi S Bardach, Jie Huang, Richard Brand, John Hsu	Evolving health information technology and the timely availability of visit diagnoses from ambulatory visits: A natural experiment in an integrated delivery system	NA	NA	NA	NA	NA	NA	NA	NA	NA	NA	NA	NA	NCBI	Bardach, Naomi S; Huang, Jie; Brand, Richard; Hsu, John			Evolving health information technology and the timely availability of visit diagnoses from ambulatory visits: A natural experiment in an integrated delivery system	NA	NA	NA	NA	NA	NA	NA	NA	NA	NA	NA	NA	NA	NA	NA	NA	NA	NA	NA	NA	BMC Med Inform Decis Mak. 2009; 9: 35. Published online 2009 July 17. doi:??10.1186/1472-6947-9-35	PMC2731742	Bardach, Naomi S; Huang, Jie; Brand, Richard; Hsu, John	NA	NA	NA	NA	NA	NA	NA
NA	NA	NA	NA	NA	NA	NA	NA	NA	NA	NA	NA	NA	NA	NA	Ovid	Bardfield, J. 1; Agins, B. 1; Palumbo, M. 1; Wei, A.L. 2; Morris, J. 3; Marston, B. 4			Improving rates of cotrimoxazole prophylaxis in resource-limited settings: implementation of a quality improvement approach.[Article]	NA	NA	NA	NA	NA	NA	NA	NA	NA	NA	NA	NA	NA	NA	NA	NA	NA	NA	NA	NA	NA	NA	NA	Journals@Ovid Full Text	00042154-201412000-00006.	Bardfield, J. 1; Agins, B. 1; Palumbo, M. 1; Wei, A.L. 2; Morris, J. 3; Marston, B. 4	Improving rates of cotrimoxazole prophylaxis in resource-limited settings: implementation of a quality improvement approach.[Article]	International Journal for Quality in Health Care. 26(6):613-622, December 2014.	NA	Papers.
NA	NA	NA	NA	NA	NA	NA	NA	NA	NA	NA	NA	NA	NA	NA	Ovid	Bardow, A. a; ten Cate, J. M. b; Nauntofte, B. a; Nyvad, B. c			Effect of Unstimulated Saliva Flow Rate on Experimental Root Caries.[Miscellaneous Article]	NA	NA	NA	NA	NA	NA	NA	NA	NA	NA	NA	NA	NA	NA	NA	NA	NA	NA	NA	NA	NA	NA	NA	Journals@Ovid Full Text	00002860-200305000-00013.	Bardow, A. a; ten Cate, J. M. b; Nauntofte, B. a; Nyvad, B. c	Effect of Unstimulated Saliva Flow Rate on Experimental Root Caries.[Miscellaneous Article]	Caries Research. 37(3):232-236, May/June 2003.	NA	Short Communication.
NA	NA	NA	NA	NA	NA	NA	NA	NA	NA	NA	NA	NA	NA	NA	Ovid	Barendse S.M. Singh H. Little S. Rutter M. Shaw J.A.M. Speight J. Heller S.			Drivers of recurrent severe hypoglycaemia and implications for its prevention: A qualitative study of adults with Type 1 diabetes.	NA	NA	NA	NA	NA	NA	NA	NA	NA	NA	NA	NA	NA	NA	NA	NA	NA	NA	NA	NA	NA	NA	NA	Embase	70696127	Barendse S.M. Singh H. Little S. Rutter M. Shaw J.A.M. Speight J. Heller S.	Drivers of recurrent severe hypoglycaemia and implications for its prevention: A qualitative study of adults with Type 1 diabetes.	Diabetic Medicine. Conference: Diabetes UK Professional Conference 2012 Glasgow United Kingdom. Conference Start: 20120307 Conference End: 20120309. Conference Publication: (var.pagings). 29 (pp 131), 2012. Date of Publication: March 2012.	NA	NA
NA	Jelle O. Barentsz, Jonathan Richenberg, Richard Clements, Peter Choyke, Sadhna Verma, Geert Villeirs, Olivier Rouviere, Vibeke Logager, Jurgen J. F?Ýtterer	ESUR prostate MR guidelines 2012	NA	NA	NA	NA	NA	NA	NA	NA	NA	NA	NA	NA	NCBI	Barentsz, Jelle O.; Richenberg, Jonathan; Clements, Richard; Choyke, Peter; Verma, Sadhna; Villeirs, Geert; Rouviere, Olivier; Logager, Vibeke; F?Ýtterer, Jurgen J.			ESUR prostate MR guidelines 2012	NA	NA	NA	NA	NA	NA	NA	NA	NA	NA	NA	NA	NA	NA	NA	NA	NA	NA	NA	NA	Eur Radiol. 2012 April; 22(4): 746???757. Published online 2012 February 10. doi:??10.1007/s00330-011-2377-y	PMC3297750	Barentsz, Jelle O.; Richenberg, Jonathan; Clements, Richard; Choyke, Peter; Verma, Sadhna; Villeirs, Geert; Rouviere, Olivier; Logager, Vibeke; F?Ýtterer, Jurgen J.	NA	NA	NA	NA	NA	NA	NA
NA	BARKER, IC; ALLEN, NS; EDGE, M; SPERRY, JA; BATTEN, RJ	SYNTHESIS, PHOTOCHEMISTRY AND CROSS-LINKING OF VISIBLY SENSITIZED PHOTOPOLYMERS OF PVA BASED ON (E)-2-(4-FORMYLSTYRYL)-3,4-DIMETHYLTHIAZOLIUM METHYLSULFATE	JOURNAL OF THE CHEMICAL SOCIETY-FARADAY TRANSACTIONS	NA	NA	NA	NA	NA	NA	NA	147	NA	NA	NA	WebOfKnowledge	BARKER, IC; ALLEN, NS; EDGE, M; SPERRY, JA; BATTEN, RJ			SYNTHESIS, PHOTOCHEMISTRY AND CROSS-LINKING OF VISIBLY SENSITIZED PHOTOPOLYMERS OF PVA BASED ON (E)-2-(4-FORMYLSTYRYL)-3,4-DIMETHYLTHIAZOLIUM METHYLSULFATE	NA	NA	NA	NA	NA	24		472	NA		NA	0956-5000	NA	NA	NA	NA	NA	NA	NA	NA	NA	NA	NA	NA	NA	NA	NA	NA	NA	NA
NA	NA	NA	NA	NA	NA	NA	NA	NA	NA	NA	NA	NA	NA	NA	Ovid	Barkhof, Frederik MD, PhD; Polman, Chris H. MD, PhD; Radue, Ernst-Wilhelm MD; Kappos, Ludwig MD; Freedman, Mark S. MD; Edan, Gilles MD; Hartung, Hans-Peter MD; Miller, David H. MD; Montalban, Xavier MD; Poppe, Peter MD; de Vos, Marlieke MSc; Lasri, Fatiha MD; Bauer, Lars MD; Dahms, Susanne PhD; Wagner, Klaus MD; Pohl, Christoph MD; Sandbrink, Rupert MD, PhD			Magnetic Resonance Imaging Effects of Interferon Beta-1b in the BENEFIT Study: Integrated 2-Year Results.[Article]	NA	NA	NA	NA	NA	NA	NA	NA	NA	NA	NA	NA	NA	NA	NA	NA	NA	NA	NA	NA	NA	NA	NA	Journals@Ovid Full Text	00000816-200709000-00015.	Barkhof, Frederik MD, PhD; Polman, Chris H. MD, PhD; Radue, Ernst-Wilhelm MD; Kappos, Ludwig MD; Freedman, Mark S. MD; Edan, Gilles MD; Hartung, Hans-Peter MD; Miller, David H. MD; Montalban, Xavier MD; Poppe, Peter MD; de Vos, Marlieke MSc; Lasri, Fatiha MD; Bauer, Lars MD; Dahms, Susanne PhD; Wagner, Klaus MD; Pohl, Christoph MD; Sandbrink, Rupert MD, PhD	Magnetic Resonance Imaging Effects of Interferon Beta-1b in the BENEFIT Study: Integrated 2-Year Results.[Article]	Archives of Neurology. 64(9):1292-1298, September 2007.	NA	Original Contribution.
NA	NA	NA	NA	NA	NA	NA	NA	NA	NA	NA	NA	NA	NA	NA	Ovid	Barkley, Russell A Ph.D.; Fischer, Mariellen Ph.D.; Smallish, Lori M.A.; Fletcher, Kenneth Ph.D.			Young Adult Outcome of Hyperactive Children: Adaptive Functioning in Major Life Activities.[Article]	NA	NA	NA	NA	NA	NA	NA	NA	NA	NA	NA	NA	NA	NA	NA	NA	NA	NA	NA	NA	NA	NA	NA	Journals@Ovid Full Text	00004583-200602000-00009.	Barkley, Russell A Ph.D.; Fischer, Mariellen Ph.D.; Smallish, Lori M.A.; Fletcher, Kenneth Ph.D.	Young Adult Outcome of Hyperactive Children: Adaptive Functioning in Major Life Activities.[Article]	Journal of the American Academy of Child & Adolescent Psychiatry. 45(2):192-202, February 2006.	NA	ARTICLES.
NA	J. W. Barksdale, J. Harvey Johnston	Acute Cholecystitis	NA	NA	NA	NA	NA	NA	NA	NA	NA	NA	NA	NA	NCBI	Barksdale, J. W.; Johnston, J. Harvey			Acute Cholecystitis	NA	NA	NA	NA	NA	NA	NA	NA	NA	NA	NA	NA	NA	NA	NA	NA	NA	NA	NA	NA	Ann Surg. 1948 May; 127(5): 816???825.	PMC1513890	Barksdale, J. W.; Johnston, J. Harvey	NA	NA	NA	NA	NA	NA	NA
NA	NA	NA	NA	NA	NA	NA	NA	NA	NA	NA	NA	NA	NA	NA	ISRCTN	Barkun, Alan	NA	NA	The dissemination of consensus recommendations on the management of Canadian patients with non-variceal upper gastrointestinal bleeding	NA	NA	NA	NA	NA	NA	NA	NA	NA	NA	NA	NA	NA	NA	NA	NA	NA	NA	NA	NA	NA	NA	NA	NA	NA	NA	The dissemination of consensus recommendations on the management of Canadian patients with non-variceal upper gastrointestinal bleeding	NA	NA	NA
NA	NA	NA	NA	NA	NA	NA	NA	NA	NA	NA	NA	NA	NA	NA	Ovid	Barkun, Alan N. MD; Bhat, Mamatha MD; Armstrong, David MD; Dawes, Martin MBBS; Donner, Allan PhD; Enns, Robert MD; Martin, Janet PharmD; Moayyedi, Paul MD; Romagnuolo, Joseph MD; Stitt, Larry MSc			Effectiveness of disseminating consensus management recommendations for ulcer bleeding: a cluster randomized trial.[Miscellaneous Article]	NA	NA	NA	NA	NA	NA	NA	NA	NA	NA	NA	NA	NA	NA	NA	NA	NA	NA	NA	NA	NA	NA	NA	Journals@Ovid Full Text	00002792-201302190-00029.	Barkun, Alan N. MD; Bhat, Mamatha MD; Armstrong, David MD; Dawes, Martin MBBS; Donner, Allan PhD; Enns, Robert MD; Martin, Janet PharmD; Moayyedi, Paul MD; Romagnuolo, Joseph MD; Stitt, Larry MSc	Effectiveness of disseminating consensus management recommendations for ulcer bleeding: a cluster randomized trial.[Miscellaneous Article]	CMAJ Canadian Medical Association Journal. 185(3):E156-E166, February 19, 2013.	NA	Research.
NA	BARLAZ, EC	APPLICATION TRACKING IN FRANKLIN TOWNSHIP A PHASED IMPLEMENTATION APPROACH	PAPERS FROM THE 1990 ANNUAL CONFERENCE OF THE URBAN AND REGIONAL INFORMATION SYSTEMS ASSOCIATION, VOL 1	NA	NA	NA	NA	NA	NA	NA	1	NA	NA	NA	WebOfKnowledge	BARLAZ, EC			APPLICATION TRACKING IN FRANKLIN TOWNSHIP A PHASED IMPLEMENTATION APPROACH	NA	NA	NA	NA	NA		URBAN & REG INFORMAT SYST ASSOC	645	NA	AUG 12-16, 1990	NA		NA	NA	NA	NA	NA	NA	NA	NA	NA	NA	NA	NA	NA	NA	NA	NA	NA	NA
NA	Karen I Barnes, Pascalina Chanda, Gebre Ab Barnabas	Impact of the large-scale deployment of artemether/lumefantrine on the malaria disease burden in Africa: case studies of South Africa, Zambia and Ethiopia	NA	NA	NA	NA	NA	NA	NA	NA	NA	NA	NA	NA	NCBI	Barnes, Karen I; Chanda, Pascalina; Barnabas, Gebre Ab			Impact of the large-scale deployment of artemether/lumefantrine on the malaria disease burden in Africa: case studies of South Africa, Zambia and Ethiopia	NA	NA	NA	NA	NA	NA	NA	NA	NA	NA	NA	NA	NA	NA	NA	NA	NA	NA	NA	NA	Malar J. 2009; 8(Suppl 1): S8. Published online 2009 October 12. doi:??10.1186/1475-2875-8-S1-S8	PMC2760243	Barnes, Karen I; Chanda, Pascalina; Barnabas, Gebre Ab	NA	NA	NA	NA	NA	NA	NA
NA	NA	NA	NA	NA	NA	NA	NA	NA	NA	NA	NA	NA	NA	NA	Ovid	Barnett G.O. Justice N.S. Somand M.E.			COSTAR - A computer-based medical information system for ambulatory care.	NA	NA	NA	NA	NA	NA	NA	NA	NA	NA	NA	NA	NA	NA	NA	NA	NA	NA	NA	NA	NA	NA	NA	Embase	979246351	Barnett G.O. Justice N.S. Somand M.E.	COSTAR - A computer-based medical information system for ambulatory care.	Proceedings of the IEEE. 67 (9) (pp 1227-1237), 1979. Date of Publication: 1979.	NA	NA
NA	NA	NA	NA	NA	NA	NA	NA	NA	NA	NA	NA	NA	NA	NA	Ovid	Barnett S. Sutter E. Pearson T.			The deaf weight wise study: A unique clinical trial of health behavior modification with deaf adults.	NA	NA	NA	NA	NA	NA	NA	NA	NA	NA	NA	NA	NA	NA	NA	NA	NA	NA	NA	NA	NA	NA	NA	Embase	71447136	Barnett S. Sutter E. Pearson T.	The deaf weight wise study: A unique clinical trial of health behavior modification with deaf adults.	Circulation. Conference: American Heart Association's Epidemiology and Prevention/Nutrition, Physical Activity, and Metabolism 2014 Scientific Sessions San Francisco, CA United States. Conference Start: 20140318 Conference End: 20140321. Conference Publication: (var.pagings). 129 , 2014. Date of Publication: 25 Mar 2014.	NA	NA
NA	NA	NA	NA	NA	NA	NA	NA	NA	NA	NA	NA	NA	NA	NA	Ovid	Barnett, Adrian G. PhD 1; Page, Katie PhD 1; Campbell, Megan BApSc 1; Brain, David 1; Martin, Elizabeth BApSc 1; Rashleigh-Rolls, Rebecca BN 1,2; Halton, Kate PhD 1; Hall, Lisa PhD 1,3; Jimmieson, Nerina PhD 4; White, Katherine 1; Paterson, David 3,5; Graves, Nicholas PhD 1,3			Changes in Healthcare-Associated Staphylococcus aureus Bloodstream Infections after the Introduction of a National Hand Hygiene Initiative.[Article]	NA	NA	NA	NA	NA	NA	NA	NA	NA	NA	NA	NA	NA	NA	NA	NA	NA	NA	NA	NA	NA	NA	NA	Journals@Ovid Full Text	00004848-201408000-00014.	Barnett, Adrian G. PhD 1; Page, Katie PhD 1; Campbell, Megan BApSc 1; Brain, David 1; Martin, Elizabeth BApSc 1; Rashleigh-Rolls, Rebecca BN 1,2; Halton, Kate PhD 1; Hall, Lisa PhD 1,3; Jimmieson, Nerina PhD 4; White, Katherine 1; Paterson, David 3,5; Graves, Nicholas PhD 1,3	Changes in Healthcare-Associated Staphylococcus aureus Bloodstream Infections after the Introduction of a National Hand Hygiene Initiative.[Article]	Infection Control & Hospital Epidemiology. 35(8):1029-1036, August 2014.	NA	ORIGINAL ARTICLE.
NA	Andy S. Barnett, N. Ewen Wang, Ritu Sahni, Renee Y. Hsia, Jason S. Haukoos, Erik D. Barton, James F. Holmes, Craig D. Newgard, the WESTRN Investigators	Variation in Prehospital Use and Uptake of the National Field Triage Decision Scheme	NA	NA	NA	NA	NA	NA	NA	NA	NA	NA	NA	NA	NCBI	Barnett, Andy S.; Wang, N. Ewen; Sahni, Ritu; Hsia, Renee Y.; Haukoos, Jason S.; Barton, Erik D.; Holmes, James F.; Newgard, Craig D.; Investigators, the WESTRN			Variation in Prehospital Use and Uptake of the National Field Triage Decision Scheme	NA	NA	NA	NA	NA	NA	NA	NA	NA	NA	NA	NA	NA	NA	NA	NA	NA	NA	NA	NA	Prehosp Emerg Care. Author manuscript; available in PMC 2014 April 1.Published in final edited form as: Prehosp Emerg Care. 2013 Apr-Jun; 17(2): 135???148. doi:??10.3109/10903127.2012.749966	PMC3645841	Barnett, Andy S.; Wang, N. Ewen; Sahni, Ritu; Hsia, Renee Y.; Haukoos, Jason S.; Barton, Erik D.; Holmes, James F.; Newgard, Craig D.; Investigators, the WESTRN	NA	NA	NA	NA	NA	NA	NA
NA	Karen N Barnett, Marion Bennie, Shaun Treweek, Christopher Robertson, Dennis J Petrie, Lewis D Ritchie, Bruce Guthrie	Effective Feedback to Improve Primary Care Prescribing Safety (EFIPPS) a pragmatic three-arm cluster randomised trial: designing the intervention (ClinicalTrials.gov registration NCT01602705)	NA	NA	NA	NA	NA	NA	NA	NA	NA	NA	NA	NA	NCBI	Barnett, Karen N; Bennie, Marion; Treweek, Shaun; Robertson, Christopher; Petrie, Dennis J; Ritchie, Lewis D; Guthrie, Bruce			Effective Feedback to Improve Primary Care Prescribing Safety (EFIPPS) a pragmatic three-arm cluster randomised trial: designing the intervention (ClinicalTrials.gov registration NCT01602705)	NA	NA	NA	NA	NA	NA	NA	NA	NA	NA	NA	NA	NA	NA	NA	NA	NA	NA	NA	NA	Implement Sci. 2014; 9(1): 133. Published online 2014 October 11. doi:??10.1186/s13012-014-0133-9	PMC4201916	Barnett, Karen N; Bennie, Marion; Treweek, Shaun; Robertson, Christopher; Petrie, Dennis J; Ritchie, Lewis D; Guthrie, Bruce	NA	NA	NA	NA	NA	NA	NA
NA	NA	NA	NA	NA	NA	NA	NA	NA	NA	NA	NA	NA	NA	NA	Ovid	Barnighausen, Till 1,2; Bloom, David E 1; Humair, Salal 1,3			Health systems and HIV treatment in sub-Saharan Africa: matching intervention and programme evaluation strategies.[Miscellaneous Article]	NA	NA	NA	NA	NA	NA	NA	NA	NA	NA	NA	NA	NA	NA	NA	NA	NA	NA	NA	NA	NA	NA	NA	Journals@Ovid Full Text	00115314-201203000-00014.	Barnighausen, Till 1,2; Bloom, David E 1; Humair, Salal 1,3	Health systems and HIV treatment in sub-Saharan Africa: matching intervention and programme evaluation strategies.[Miscellaneous Article]	Sexually Transmitted Infections. 88(2):e2, March 2012.	NA	National and international issues.
NA	NA	NA	NA	NA	NA	NA	NA	NA	NA	NA	NA	NA	NA	NA	Ovid	Barocas, Daniel A. a,*; Cowan, Janet E. b,+; Smith, Joseph A. Jr. a,*; Carroll, Peter R. b,++,[S]; CaPSURE Investigators			What Percentage of Patients With Newly Diagnosed Carcinoma of the Prostate are Candidates for Surveillance? An Analysis of the CaPSURETM Database.[Miscellaneous Article]	NA	NA	NA	NA	NA	NA	NA	NA	NA	NA	NA	NA	NA	NA	NA	NA	NA	NA	NA	NA	NA	NA	NA	Journals@Ovid Full Text	00076734-200810000-00038.	Barocas, Daniel A. a,*; Cowan, Janet E. b,+; Smith, Joseph A. Jr. a,*; Carroll, Peter R. b,++,[S]; CaPSURE Investigators	What Percentage of Patients With Newly Diagnosed Carcinoma of the Prostate are Candidates for Surveillance? An Analysis of the CaPSURETM Database.[Miscellaneous Article]	Journal of Urology. 180(4):1330-1334, October 2008.	NA	Adult Urology: Oncology: Prostate/Testis/Penis/Urethra.
NA	Jean-Claude Baron, Sandra E. Black, Andrew J. Butler, James Carey, Francois Chollet, Leonardo G. Cohen, Maurizio Corbetta, Steven C. Cramer, Bruce H. Dobkin, Richard Frackowiak, W.D. Heiss, Heidi Johansen-Berg, John W. Krakauer, Ronald M. Lazar, Laura L. Lennihan, Isabelle Loubinoux, Randolph S. Marshall, Paul Matthews, J.P. Mohr, Gereon Nelles, Alvaro Pascual-Leone, Valerie Pomeroy, Michel Rijnt…	Neuroimaging in Stroke Recovery: A Position Paper from the First International Workshop on Neuroimaging and Stroke Recovery	NA	NA	NA	NA	NA	NA	NA	NA	NA	NA	NA	NA	NCBI	Baron, Jean-Claude; Black, Sandra E.; Butler, Andrew J.; Carey, James; Chollet, Francois; Cohen, Leonardo G.; Corbetta, Maurizio; Cramer, Steven C.; Dobkin, Bruce H.; Frackowiak, Richard; Heiss, W.D.; Johansen-Berg, Heidi; Krakauer, John W.; Lazar, Ronald M.; Lennihan, Laura L.; Loubinoux, Isabelle; Marshall, Randolph S.; Matthews, Paul; Mohr, J.P.; Nelles, Gereon; Pascual-Leone, Alvaro; Pomeroy,…			Neuroimaging in Stroke Recovery: A Position Paper from the First International Workshop on Neuroimaging and Stroke Recovery	NA	NA	NA	NA	NA	NA	NA	NA	NA	NA	NA	NA	NA	NA	NA	NA	NA	NA	NA	NA	Cerebrovasc Dis. Author manuscript; available in PMC 2013 July 22.Published in final edited form as: Cerebrovasc Dis. 2004; 18(3): 260???267.	PMC3718532	Baron, Jean-Claude; Black, Sandra E.; Butler, Andrew J.; Carey, James; Chollet, Francois; Cohen, Leonardo G.; Corbetta, Maurizio; Cramer, Steven C.; Dobkin, Bruce H.; Frackowiak, Richard; Heiss, W.D.; Johansen-Berg, Heidi; Krakauer, John W.; Lazar, Ronald M.; Lennihan, Laura L.; Loubinoux, Isabelle; Marshall, Randolph S.; Matthews, Paul; Mohr, J.P.; Nelles, Gereon; Pascual-Leone, Alvaro; Pomeroy,…	NA	NA	NA	NA	NA	NA	NA
NA	NA	NA	NA	NA	NA	NA	NA	NA	NA	NA	NA	NA	NA	NA	Ovid	Baron, Pedro W. 1; Ojogho, Okechukwu N. 1; Yorgin, Peter 2; Sahney, Shobha 2; Cutler, Drew 2; Ben-Youssef, Ramzi 1; Baqai, Waheed 3; Weissman, Jill 4; Franco, Edson 1; Zuppan, Craig 5; Concepcion, Waldo 6			Comparison of outcomes with low-dose anti-thymocyte globulin, basiliximab or no induction therapy in pediatric kidney transplant recipients: A retrospective study.[Article]	NA	NA	NA	NA	NA	NA	NA	NA	NA	NA	NA	NA	NA	NA	NA	NA	NA	NA	NA	NA	NA	NA	NA	Journals@Ovid Full Text	00125738-200802000-00007.	Baron, Pedro W. 1; Ojogho, Okechukwu N. 1; Yorgin, Peter 2; Sahney, Shobha 2; Cutler, Drew 2; Ben-Youssef, Ramzi 1; Baqai, Waheed 3; Weissman, Jill 4; Franco, Edson 1; Zuppan, Craig 5; Concepcion, Waldo 6	Comparison of outcomes with low-dose anti-thymocyte globulin, basiliximab or no induction therapy in pediatric kidney transplant recipients: A retrospective study.[Article]	Pediatric Transplantation. 12(1):32-39, February 2008.	NA	ORIGINAL ARTICLE.
NA	Giovanni Barone, Luca Maggio, Annalisa Saracino, Alessandro Perri, Costantino Romagnoli, Enrico Zecca	How to feed small for gestational age newborns	NA	NA	NA	NA	NA	NA	NA	NA	NA	NA	NA	NA	NCBI	Barone, Giovanni; Maggio, Luca; Saracino, Annalisa; Perri, Alessandro; Romagnoli, Costantino; Zecca, Enrico			How to feed small for gestational age newborns	NA	NA	NA	NA	NA	NA	NA	NA	NA	NA	NA	NA	NA	NA	NA	NA	NA	NA	NA	NA	Ital J Pediatr. 2013; 39: 28. Published online 2013 May 10. doi:??10.1186/1824-7288-39-28	PMC3660241	Barone, Giovanni; Maggio, Luca; Saracino, Annalisa; Perri, Alessandro; Romagnoli, Costantino; Zecca, Enrico	NA	NA	NA	NA	NA	NA	NA
NA	NA	NA	NA	NA	NA	NA	NA	NA	NA	NA	NA	NA	NA	NA	Ovid	Barqawi, Al B. *; Stoimenova, Diliana; Krughoff, Kevin; Eid, Khadijah; O'Donnell, Colin; Phillips, Jason M.; Crawford, David E.			Targeted Focal Therapy for the Management of Organ Confined Prostate Cancer.[Miscellaneous Article]	NA	NA	NA	NA	NA	NA	NA	NA	NA	NA	NA	NA	NA	NA	NA	NA	NA	NA	NA	NA	NA	NA	NA	Journals@Ovid Full Text	00076734-201409000-00035.	Barqawi, Al B. *; Stoimenova, Diliana; Krughoff, Kevin; Eid, Khadijah; O'Donnell, Colin; Phillips, Jason M.; Crawford, David E.	Targeted Focal Therapy for the Management of Organ Confined Prostate Cancer.[Miscellaneous Article]	Journal of Urology. 192(3):749-753, September 2014.	NA	Adult Urology: Oncology: Prostate/Testis/Penis/Urethra.
NA	R. D. Barr, J. Sertic	Soft-tissue necrosis induced by extravasated cancer chemotherapeutic agents: a study of active intervention.	NA	NA	NA	NA	NA	NA	NA	NA	NA	NA	NA	NA	NCBI	Barr, R. D.; Sertic, J.			Soft-tissue necrosis induced by extravasated cancer chemotherapeutic agents: a study of active intervention.	NA	NA	NA	NA	NA	NA	NA	NA	NA	NA	NA	NA	NA	NA	NA	NA	NA	NA	NA	NA	Br J Cancer. 1981 August; 44(2): 267???269.	PMC2010747	Barr, R. D.; Sertic, J.	NA	NA	NA	NA	NA	NA	NA
[truncated: 7,092 more rows]
[truncated: 77 more columns]

## Sheet: Records for full-text analysis
ID	AU	TI	SO	YR	NO	PB	KY	CC	DOI	US	VL	PG	PM	PT	Search.Engine	AU.Sort	Manual.AU	Manual.TI	TI.Sort	DESCRIPTORS	PMID	T1	JF	A1	IS	SP	EP	Y1	CY	AD	SN	N2	KW	M3	DO	ER	r.......60...Furthermore..the.children.who.received.the.intervention.made.significantly.more.positive.statements.about.the.game.and.about.their.partners..p....02..r.......34..suggesting.that.the.intervention.increased.their.confidence.and.enjoyment...PsycINFO.Database.Record..c..2014.APA..all.rights.reserved.	T2	A2	PUB.DET	PMCID	AU.Adj	Database	Accession.Number	Author	Title	Source	Status	Document.Type
[truncated: 472 more rows]
[truncated: 78 more columns]

## Sheet: Key to sheets
Sheet	Contents
Final included studies	Details on the 123 studies included in the review
[truncated: 3 more rows]
